# Supplementary material for: A gene regulatory element modulates myosin expression and controls cardiomyocyte response to stress
Source: HighWire-hosted journal article supplement (doi:10.1101/gr.280825.125), 2025-10-22
Supplement: Supplemental_Table_S1.xlsx [file Supplemental_Table_S1.xlsx]

## Sheet: Index
Tab	Summary of contents
Nuclei	The nuclei tab has the measurements for all muclei imaged in these experiments.
phase_summary_table	phase_summary_table contain all information related to genomic content distribution and associated cell cycle stage

## Sheet: Nuclei
ImageNumber	ObjectNumber	AreaShape_Area	Children_EdU_Count	Intensity_IntegratedIntensity_Alpha_actinin	Intensity_IntegratedIntensity_DNA	Intensity_IntegratedIntensity_EdU	Intensity_IntegratedIntensity_pHH3
1	1	1362	0	71.5515	373.407	750.408	255.762
1	2	1872	0	81.4837	580.672	839.042	280.488
1	3	1037	0	36.0853	218.463	377.241	151.616
1	4	1002	0	37.5524	278.702	5.35477	145.896
1	5	1103	0	31.956	268.318	5.56844	166.461
1	6	1367	0	41.6225	414.899	16.1754	184.53
1	7	1222	0	55.1524	284.522	5.91547	185.012
1	8	1404	0	49.6058	341.346	7.30475	194.003
1	9	1178	0	44.8955	304.669	5.78538	164.824
1	10	1247	0	38.2241	313.347	6.56915	191.687
1	11	1205	0	33.8631	281.94	5.76161	184.882
1	12	1140	0	45.9563	331.529	6.51585	156.197
1	13	1090	0	30.1122	299.562	6.25452	149.598
1	14	2236	0	73.4609	568.978	10.6626	335.157
1	15	1287	0	45.7949	443.927	19.0964	174.948
1	16	1022	0	64.7268	273.964	5.42602	142.877
1	17	1225	0	54.4178	261.438	6.26702	183.803
1	18	2469	0	93.1413	667.186	12.8007	377.833
1	19	1095	0	43.7704	235.496	5.30367	150.2
1	20	1223	0	38.6722	327.191	6.53132	188.825
1	21	1137	0	54.1478	332.649	6.14882	156.195
1	22	1155	0	31.5741	253.054	5.4918	172.742
1	23	1384	1	50.3489	329.154	820.142	275.388
1	24	1639	1	74.7901	415.177	838.532	330.626
1	25	1560	1	230.686	485.21	907.655	274.238
1	26	1035	0	30.3052	281.386	6.34771	149.397
1	27	1064	0	36.1072	370.77	12.1781	156.909
1	28	2686	1	76.3111	655.047	287.904	401.557
1	29	1290	0	43.3553	324.897	6.74321	181.934
1	30	1366	1	52.2011	379.296	848.64	236.37
1	31	1522	1	65.4733	444.181	889.213	259.758
1	32	977	1	45.4672	264.511	246.265	152.151
1	33	1116	0	39.5807	297.102	6.32876	170.936
1	34	1093	0	68.6644	295.384	5.58862	163.793
1	35	1059	0	32.4675	320.695	5.54505	164.538
1	36	1192	0	29.6607	296.424	6.34302	182.271
1	37	1782	1	144.386	493.405	937.962	296.532
1	38	1686	1	121.244	498.327	961.622	283.811
1	39	1355	1	51.5389	417.999	483.65	210.091
1	40	1133	0	34.858	318.574	5.73097	153.294
1	41	1683	1	65.6413	481.088	958.82	282.627
1	42	2929	1	160.366	860.786	1809.58	497.053
1	43	1593	1	96.5972	484.014	976.727	243.36
1	44	1019	0	40.5977	334.786	77.8245	165.543
1	45	1123	0	69.618	310.55	17.867	153.992
1	46	1743	0	69.8595	538.068	8.37935	236.866
1	47	1263	0	65.1862	288.389	7.41599	192.364
1	48	1392	0	54.6249	339.915	6.8542	195.37
1	49	1039	0	29.8305	284.557	5.31164	146.908
1	50	1045	0	63.2715	276.816	9.62513	155.335
1	51	968	0	40.8353	283.312	6.81944	143.343
1	52	1295	0	133.207	365.974	7.13803	177.309
1	53	1007	0	45.3045	336.434	5.29403	155.521
1	54	970	0	38.4691	333.415	5.00574	149.9
1	55	1358	0	63.0657	349.553	6.63137	189.656
1	56	1574	0	54.5044	465.201	7.40574	213.916
1	57	1522	1	74.6132	462.135	1031.19	316.063
1	58	1156	0	90.8874	297.78	6.81975	171.2
1	59	1004	1	78.7861	269.128	499.87	158.733
1	60	1114	0	53.3923	318.822	5.95692	172.245
1	61	1241	0	31.6372	319.52	6.49526	188.798
1	62	965	1	48.3683	257.856	341.321	143.48
1	63	993	1	67.9437	270.019	500.1	156.394
1	64	1111	0	29.687	293.179	7.31371	156.108
1	65	1302	0	35.3119	342.824	6.4332	192.089
1	66	1450	1	87.6632	454.566	1022.75	290.858
1	67	1370	0	50.8578	337.296	55.6291	198.912
1	68	1323	1	91.4508	454.662	981.203	263.679
1	69	1097	0	46.6972	318.625	8.07698	164.294
1	70	1173	0	56.0198	325.399	6.51148	168.614
1	71	1071	0	44.4946	337.202	5.51823	148.017
1	72	1013	0	30.5697	319.633	5.12917	152.222
1	73	1034	0	32.363	294.13	6.67883	151.857
1	74	1032	0	41.3424	294.003	6.38073	153.282
1	75	1940	0	67.8543	577.904	11.196	284.174
1	76	1768	1	101.87	447.014	897.611	317.95
1	77	1261	0	43.2642	345.861	49.9712	171.426
1	78	1366	0	35.2013	345.546	6.90584	199.022
1	79	1076	0	38.492	335.721	79.2143	158.658
1	80	2093	0	101.187	615.533	14.1886	306.64
1	81	1697	1	100.578	515.15	433.46	246.585
1	82	1128	0	58.5902	326.113	5.70181	169.212
1	83	1648	1	92.9712	440.943	917.368	267.37
1	84	1366	0	35.2914	333.822	6.59495	185.376
1	85	1065	0	36.6945	329.762	78.1999	156.661
1	86	1982	0	101.735	611.607	11.3121	287.979
1	87	1183	0	63.0273	298.181	6.123	173.743
1	88	1202	0	35.1788	354.259	6.15914	174.741
1	89	973	0	34.5943	291.52	5.39654	140.602
1	90	1152	0	44.1354	337.185	6.22052	164.487
1	91	2256	0	66.2614	695.25	11.6379	327.015
1	92	1167	0	43.5823	332.667	6.20029	165.079
1	93	1250	0	52.679	315.611	6.89946	174.964
1	94	1342	0	69.8085	358.264	7.76516	186.253
1	95	1215	0	31.4982	254.797	6.02684	176.786
1	96	1139	0	38.9305	312.72	6.07401	166.347
1	97	1458	0	52.8692	374.725	8.87568	195.572
1	98	989	0	56.1287	318.838	5.21524	146.814
1	99	1241	0	58.6994	307.318	6.83255	177.428
1	100	1616	1	90.6613	455.997	950.161	272.083
1	101	1268	0	97.5378	407.582	6.86999	169.004
1	102	989	0	37.4404	287.847	5.24112	141.324
1	103	1025	0	37.6667	319.542	5.47642	149.141
1	104	1005	0	43.3632	317.808	54.8575	151.557
1	105	1387	0	40.0842	371.307	6.8197	187.719
1	106	986	0	64.5107	306.898	5.41636	146.821
1	107	970	0	106.595	292.763	5.19908	128.756
1	108	1142	0	61.7499	318.826	6.32201	163.406
1	109	1210	0	42.2986	337.507	6.09055	160.02
1	110	1174	0	61.1548	326.844	9.17104	166.65
1	111	1248	0	47.575	363.388	56.8787	175.24
1	112	3125	1	374.283	817.366	277.44	419.314
1	113	1201	0	69.2166	338.702	6.43781	179.152
1	114	1254	0	44.0435	358.81	6.98747	186.688
1	115	2275	0	166.218	710.825	11.9807	327.718
1	116	1140	0	40.9186	342.342	6.37139	168.324
1	117	1606	1	105.357	465.064	732.168	242.196
1	118	3384	1	327.163	999.223	1880.21	531.503
1	119	1062	0	46.5781	364.885	6.04288	154.327
1	120	1346	0	35.1482	345.248	6.53639	176.5
1	121	995	0	49.672	340.325	7.01473	146.722
1	122	1253	1	42.9	336.817	51.3069	174.943
1	123	1523	1	71.1922	430.928	884.674	232.107
1	124	2556	0	79.4486	726.738	13.841	331.053
1	125	1179	0	64.4198	342.865	6.19234	173.27
1	126	2002	1	129.35	567.224	520.967	304.873
1	127	1367	0	35.913	350.725	6.81851	179.071
1	128	1127	0	39.6516	358.52	6.32866	159.732
1	129	2636	0	79.4616	741.295	14.1208	360.487
1	130	1198	0	47.2337	362.692	6.5172	169.618
1	131	1107	0	36.4761	345.956	6.73333	147.305
1	132	1270	0	54.0222	350.906	64.9132	184.916
1	133	1069	1	45.6503	292.8	208.337	156.336
1	134	1431	0	61.9968	358.824	8.66374	197.079
1	135	1211	0	49.3069	336.055	116.99	172.393
1	136	1382	0	74.5894	357.995	8.36127	190.287
1	137	1043	0	37.4757	344.289	5.79789	141.375
1	138	1501	1	80.2507	421.822	242.148	222.052
1	139	1235	0	70.2616	359.875	7.5977	177.251
1	140	1282	0	66.3626	411.864	16.8019	167.518
1	141	1115	0	52.0714	356.888	5.98593	149.013
1	142	1207	0	68.2117	361.324	8.92711	172.886
1	143	1581	1	68.2712	458.094	1040.83	241.643
1	144	1322	1	67.8785	452.55	912.583	194.054
1	145	1296	0	43.1809	320.885	7.34829	176.479
1	146	1226	0	58.5574	383.565	6.87259	163.352
1	147	1304	0	45.1913	325.847	8.10283	177.996
1	148	1231	0	53.6914	362.436	6.86282	172.83
1	149	1407	0	61.0608	339.17	8.34971	191.011
1	150	1455	1	116.823	394.953	255.409	212.71
1	151	1736	1	66.2515	507.519	983.439	248.735
1	152	1673	1	79.6375	479.625	928.77	231.418
1	153	1193	0	49.259	355.257	6.54417	166.614
1	154	1644	1	88.8175	453.696	1015.86	244.566
1	155	2152	1	103.138	580.853	637.5	306.311
1	156	1433	1	61.6904	351.62	17.2121	194.072
1	157	1406	0	92.0633	382.611	39.4357	180.106
1	158	1095	0	34.2999	362.031	6.05982	145.467
1	159	1323	0	59.8479	348.575	7.29575	175.928
1	160	2239	0	70.4237	707.24	13.0936	311.294
1	161	1211	1	47.4479	380.987	304.325	157.759
1	162	1622	1	119.347	498.731	1055.47	243.471
1	163	1747	1	94.8889	519.868	1003.09	247.284
1	164	1133	0	47.5899	336.815	6.75511	158.694
1	165	1267	0	35.1205	318.545	6.88948	175.429
1	166	1096	1	34.3463	235.31	412.271	147.191
1	167	2388	0	97.2424	723.338	15.7393	320.124
1	168	1305	0	36.4391	321.196	7.0108	179.542
1	169	1261	0	54.6968	312.957	9.55932	158.908
1	170	1908	0	120.822	663.629	12.3501	259.338
1	171	1077	1	48.1734	272.539	517.534	151.997
1	172	1607	0	54.8117	384.059	8.73045	222.541
1	173	1080	1	43.9456	289.632	167.368	147.21
1	174	964	1	56.8206	248.152	476.787	136.342
1	175	1424	0	62.467	394.237	7.59098	182.774
1	176	1300	0	62.2951	366.887	7.21061	163.975
1	177	993	0	64.7077	321.662	5.6421	134.945
1	178	1330	0	52.1389	374.553	12.3538	173.623
1	179	1135	1	36.6584	243.801	435.309	150.837
1	180	1151	0	76.3414	333.901	6.73762	157.393
1	181	1574	1	69.2846	510.974	790.805	224.831
1	182	1471	1	68.3589	415.252	603.755	213.724
1	183	1113	1	48.8195	271.21	503.877	152.402
1	184	1265	1	43.1684	369.498	276.623	172.326
1	185	1183	0	81.6354	340.913	6.84938	160.973
1	186	1320	0	44.9052	361.747	61.5592	179.591
1	187	1150	0	40.3225	350.043	13.8626	154.834
1	188	1324	0	46.176	356.447	9.36011	179.643
1	189	1661	1	94.1312	457.778	1027.09	257.171
1	190	1104	0	42.2437	338.742	6.92517	145.851
1	191	2927	1	107.269	854.347	612.892	397.44
1	192	1100	1	52.3032	254.329	462.892	149.147
1	193	1189	0	52.011	320.754	112.626	155.632
1	194	1784	1	132.768	460.42	1117.17	251.841
1	195	2271	0	103.268	714.497	13.4391	295.14
1	196	1217	0	36.1385	346.795	6.73617	154.767
1	197	1474	1	68.3729	420.954	707.991	214.225
1	198	1333	1	59.0583	419.454	694.483	189.187
1	199	1316	0	41.227	356.732	7.49856	175.364
1	200	1025	1	41.5859	249.048	482.119	145.21
1	201	1382	1	78.918	428.112	1043.34	206.305
1	202	1061	1	36.9545	291.708	160.867	143.028
1	203	1862	0	114.055	694.77	10.4654	234.882
1	204	1379	1	88.6066	463.538	1023.28	191.515
1	205	1198	0	54.2275	370.123	10.148	159.874
1	206	1441	1	124.659	442.05	1035.91	231.161
1	207	1554	0	54.2184	416.388	40.4641	198.332
1	208	1268	0	36.1388	345.866	7.44842	157.788
1	209	2001	0	55.6635	425.418	10.398	252.836
1	210	1475	1	67.5999	455.095	1101.8	225.173
1	211	1028	1	39.8931	281.795	174.903	134.661
1	212	1060	0	51.4706	359.089	10.1105	140.706
1	213	1279	1	47.5304	412.147	540.251	177.084
1	214	1210	1	43.5383	271.562	489.843	160.69
1	215	2479	0	108.853	720.424	14.6506	324.743
1	216	1871	1	84.4406	483.99	995.394	253.313
1	217	1119	0	51.8815	351.192	7.58653	148.542
1	218	1484	0	40.9454	305.448	8.41959	193.045
1	219	1217	0	56.6942	359.245	7.01451	153.317
1	220	1378	0	50.6078	393.159	7.78012	174.133
1	221	1408	1	64.2509	449.336	1020.67	205.247
1	222	1539	1	83.9621	435.828	1017.13	223.43
1	223	1221	0	45.7253	325.923	7.79779	154.402
1	224	1332	0	37.343	269.015	7.08574	166.739
1	225	1244	0	53.2762	365.366	7.49397	155.997
1	226	1177	0	53.7281	348.419	6.96407	148.82
1	227	2738	1	115.274	841.643	1527.76	365.3
1	228	1113	0	40.6331	375.266	48.2345	138.185
1	229	1318	0	67.4078	365.454	7.89084	171.69
1	230	2312	0	91.6614	744.771	14.9911	299.596
1	231	1315	0	38.3255	371.489	7.43456	164.095
1	232	1670	1	78.7294	484.687	676.438	232.819
1	233	1048	0	45.5202	337.648	7.23766	138.979
1	234	1245	1	47.6339	283.244	527.766	163.44
1	235	1271	0	48.3367	359.523	7.81273	158.429
1	236	1213	0	44.5262	355.269	6.99715	151.521
1	237	1347	0	55.4065	364.202	9.33144	167.927
1	238	2399	0	143.626	725.255	19.2777	313.723
1	239	1191	0	49.5067	350.472	8.43694	147.308
1	240	1196	0	46.6645	359.227	6.82249	148.215
1	241	1979	1	77.645	577.707	1098.74	294.125
1	242	1509	0	51.7109	395.199	71.2199	195.529
1	243	1114	0	64.9891	363.236	6.53288	143.797
1	244	1693	1	67.3108	501.771	800.981	224.948
1	245	1774	1	103.992	505.938	1002.48	262.719
1	246	1137	0	73.0961	351.587	10.5596	146.846
1	247	1823	1	217.625	533.303	1177.75	336.549
1	248	1148	0	51.8144	376.672	6.79585	142.057
1	249	1677	1	82.6202	490.953	1074.32	258.948
1	250	1748	1	68.9569	509.026	1009.8	244.259
1	251	1180	0	48.8045	351.545	6.85	150.701
1	252	1325	0	57.8706	371.791	8.24903	171.727
1	253	1698	1	77.0833	503.454	1145.17	239.849
1	254	2340	0	111.13	766.333	14.6975	304.139
1	255	1190	0	36.9141	338.397	7.02046	142.671
1	256	2973	1	304.238	1029.29	2214.28	462.174
1	257	1175	0	38.3915	323.388	7.72445	145.206
1	258	1186	0	56.5213	365.524	7.03697	150.875
1	259	2477	0	130.82	836.788	21.6127	300.649
1	260	1155	0	45.0483	323.878	8.93007	147.5
1	261	1498	1	66.6481	425.127	411.954	199.924
1	262	1869	0	158.094	549.786	348.688	242.902
1	263	1555	1	122.392	431.567	274.807	203.515
1	264	1346	0	51.6106	421.173	9.85605	171.688
1	265	2217	0	161.839	725.21	24.7545	281.482
1	266	1085	1	50.6827	248.85	518.506	145.002
1	267	1522	0	50.635	397.835	9.61477	192.063
1	268	1454	0	63.3943	353.449	9.91518	185.259
1	269	1491	1	113.358	427.808	280.792	194.153
1	270	1360	0	55.289	360.174	9.69728	173.403
1	271	1717	1	115.052	499.244	1161.5	249.77
1	272	1529	0	95.0631	395.281	8.85031	176.673
1	273	1428	0	91.0922	417.348	81.2549	183.413
1	274	1219	0	48.0258	375.598	6.76584	147.861
1	275	1089	1	53.9727	265.296	573.728	144.772
1	276	992	0	59.8375	461.672	6.62058	128.684
1	277	1517	0	74.2078	409.546	10.6393	190.156
1	278	1676	1	81.4555	507.583	1188.96	254.222
1	279	1040	1	53.1126	249.7	545.034	138.452
1	280	1502	0	139.754	485.492	271.258	196.63
1	281	1651	1	100.186	478.382	1206.84	219.056
1	282	1295	0	57.6331	384.883	7.33689	151.534
1	283	1055	1	53.6587	333.521	475.291	139.043
1	284	1654	1	84.9896	479.185	1096.44	249.936
1	285	1344	0	94.3633	405.316	29.3849	157.399
1	286	1190	0	47.5765	314.226	11.2666	140.997
1	287	1463	1	73.7926	467.002	818.676	204.329
1	288	1314	0	46.7353	375.198	71.5631	160.589
1	289	1244	1	45.8006	299.946	367.474	159.071
1	290	1477	0	42.2321	403.09	8.00679	171.375
1	291	1451	0	41.9628	398.469	7.84837	168.56
1	292	2523	0	254.911	785.821	14.3239	296.435
1	293	1560	1	78.4534	502.53	1158.44	225.533
1	294	1057	0	37.2643	374.054	7.05704	131.844
1	295	1514	0	42.6972	408.699	8.13988	174.093
1	296	2929	1	176.218	893.927	1048.52	371.935
1	297	1207	0	71.4028	391.06	7.1631	137.697
1	298	1549	0	74.6554	409.478	8.42551	178.813
1	299	1358	0	70.1246	402.934	7.86415	153.266
1	300	1211	0	86.586	369.202	7.17688	131.264
1	301	1218	0	68.0147	390.019	6.89055	138.387
1	302	1340	0	40.1632	381.003	7.25695	154.595
1	303	1529	1	60.1565	480.795	943.684	199.523
1	304	1451	0	41.339	406.479	7.86951	166.529
1	305	2001	1	82.7876	597.151	1071.16	254.846
1	306	1659	1	101.356	474.405	1180.01	220.765
1	307	1064	0	35.5715	353.194	7.25856	121.784
1	308	1247	0	52.8455	396.221	7.03456	140.151
1	309	1814	0	91.2901	709.048	11.2952	223.119
1	310	966	1	61.1708	250.151	566.08	124.039
1	311	1129	0	82.0154	370.954	6.70259	127.136
1	312	1139	0	89.8172	393.043	6.71771	128.185
1	313	1199	0	60.1918	383.118	8.33014	143.104
1	314	1812	1	86.5637	486.437	839.777	216.182
1	315	981	1	53.7249	244.889	546.467	125.527
1	316	2250	0	112.649	738.189	12.7248	258.447
1	317	1606	1	155.079	488.849	1078.13	240.602
1	318	1288	0	81.7438	311.059	7.91962	144.768
1	319	1619	0	82.1882	376.923	9.44396	196.066
1	320	1130	0	40.2499	344.56	7.12802	138.34
1	321	1772	0	67.0786	664.24	10.1937	221.119
1	322	1286	0	32.6946	343.35	6.10245	151.904
1	323	1031	0	37.7009	321.994	5.11221	123.14
1	324	2469	0	120.804	648.315	12.6408	308.412
1	325	1133	0	28.3237	301.701	5.07514	139.976
1	326	1063	0	46.1162	299.252	4.99287	136.853
1	327	963	0	29.6641	298.241	4.49094	125.322
1	328	1911	0	69.9343	602.567	9.1783	255.068
1	329	1046	0	33.6618	300.002	4.53327	135.366
1	330	2374	0	108.553	634.941	11.0484	334.156
1	331	1003	0	31.31	309.468	4.53144	135.452
1	332	1179	0	49.6154	307.91	5.33619	156.792
1	333	1269	0	110.814	304.034	5.70706	164.272
1	334	1237	0	127.656	308.042	5.34842	159.621
1	335	1440	0	45.173	338.028	6.98422	199.496
1	336	3501	0	163.992	1275.72	16.9641	458.106
1	337	1669	2	77.0489	463.596	686.536	389.158
1	338	1395	1	52.73	392.29	481.922	201.256
1	339	1697	1	62.2057	440.311	882.985	255.756
1	340	1016	0	29.3674	316.21	4.91167	137.337
1	341	2622	0	120.679	655.025	12.1146	336.578
1	342	1252	0	34.8636	318.987	5.74281	161.833
1	343	2707	0	117.943	653.367	12.5478	346.182
1	344	1447	1	113.642	443.399	825.605	222.825
1	345	1669	1	80.6707	455.004	842.024	263.428
1	346	969	1	39.9473	192.285	283.35	132.212
1	347	1388	1	54.0399	386.927	391.656	191.933
1	348	1011	0	32.9184	281.01	201.044	137.756
1	349	1063	1	31.5213	213.613	311.898	143.997
1	350	1843	0	105.692	463.676	8.87262	238.186
1	351	1171	1	48.3092	241.501	350.715	161.513
1	352	1816	1	95.5347	562.106	743.307	257.029
1	353	990	0	66.342	298.397	4.97412	128.095
1	354	1814	1	75.9197	512.811	430.362	245.897
1	355	1117	0	68.6632	351.925	5.61506	144.603
1	356	1477	0	83.2296	347.951	7.1413	187.551
1	357	1257	0	42.9831	346.605	6.67036	158.706
1	358	1889	0	94.722	659.003	13.4645	242.917
1	359	1006	0	34.5486	313.8	14.6911	127.493
1	360	1011	0	52.7465	317.213	5.04279	128.892
1	361	1385	0	55.5015	341.016	6.87001	174.16
1	362	1439	1	72.8222	424.41	843.345	207.35
1	363	1593	1	134.5	450.129	866.24	241.703
1	364	1491	0	38.6725	343.653	6.71296	186.505
1	365	1202	0	77.4502	325.134	5.6936	157.655
1	366	1272	0	50.323	348.225	6.94812	158.4
1	367	2486	0	138.92	1221.46	15.8589	318.884
1	368	2592	1	441.771	945.326	861.21	374.57
1	369	1595	1	62.1568	427.496	315.178	214.197
1	370	1065	0	39.0525	307.711	81.2682	135.681
1	371	3570	0	374.664	930.321	17.6542	458.598
1	372	1509	0	80.7738	364.493	8.37606	190.835
1	373	1148	1	38.8997	277.268	185.864	148.443
1	374	1122	0	41.0291	320.245	6.05428	141.899
1	375	1537	1	129.964	450.591	889.991	258.098
1	376	1251	0	101.588	328.032	5.97321	163.808
1	377	1491	0	140.333	383.847	8.3631	192.364
1	378	1274	0	42.5722	373.784	31.0087	163.741
1	379	1282	0	57.9929	343.707	6.13967	163.343
1	380	1751	1	84.3035	485.916	748.543	249.101
1	381	1052	0	55.4492	331.306	5.86999	132.218
1	382	1341	1	60.2194	411.655	675.018	184.554
1	383	1450	0	74.7862	376.963	6.88693	183.855
1	384	1283	0	58.3778	353.403	6.66375	158.237
1	385	1570	0	79.4545	342.88	7.98369	195.322
1	386	1497	0	58.9803	313.134	9.10648	185.839
1	387	5580	0	404.717	1840.84	32.4149	715.047
1	388	1261	0	54.3183	315.766	6.4786	161.698
1	389	1280	0	46.7757	342.501	6.52647	157.199
1	390	1818	0	106.703	714.64	9.84105	229.33
1	391	1245	0	45.0056	321.681	6.1346	161.255
1	392	1262	0	66.9701	395.284	10.3832	159.402
1	393	1936	0	117.349	651.295	10.8456	243.886
1	394	1558	0	41.1266	385.507	7.66084	195.98
1	395	1042	0	33.6974	329.06	5.3619	128.312
1	396	1152	0	32.9175	337.855	6.98056	137.145
1	397	3150	1	278.041	982.569	1840.43	479.989
1	398	1270	0	61.4513	288.568	5.95122	158.025
1	399	1569	1	141.477	469.787	894.934	244.449
1	400	994	0	33.4968	292.803	124.78	122.609
1	401	1627	1	59.2723	457.96	773.579	222.709
1	402	1615	1	68.7351	505.235	912.648	226.285
1	403	1473	0	40.1131	371.712	7.27778	183.426
1	404	1364	0	63.772	385.481	8.11025	168.957
1	405	1593	0	130.665	473.504	7.9985	194.603
1	406	2151	1	70.6177	554.689	567.523	287.494
1	407	1180	0	40.9581	336.718	8.57073	140.389
1	408	1635	1	76.1969	502.479	562.552	205.708
1	409	1473	1	59.883	466.31	939.638	208.999
1	410	1869	0	63.7868	697.065	10.1573	231.488
1	411	1132	0	74.5613	273.904	125.104	144.278
1	412	1508	1	67.4876	448.122	632.201	192.002
1	413	1245	0	39.2626	327.308	6.18938	157.279
1	414	4060	0	231.747	1103.63	21.7453	490.404
1	415	1067	0	50.5522	338.158	6.51299	129.209
1	416	1512	1	75.079	450.568	884.088	205.66
1	417	2489	0	137.188	738.22	13.1319	316.011
1	418	1044	0	43.689	333.741	6.0981	125.815
1	419	2839	0	127.966	761.41	13.9668	352.778
1	420	1299	0	57.7964	368.276	6.59301	162.851
1	421	1690	1	96.4417	492.624	811.934	223.038
1	422	2105	0	169.644	652.87	11.5214	244.879
1	423	3674	1	158.715	1168.09	1919.21	470.755
1	424	1787	1	139.673	507.687	788.856	249.186
1	425	1238	0	58.5932	364.531	9.69856	149.034
1	426	4542	0	267.216	1287.17	24.215	547.418
1	427	1006	0	66.2505	339.59	5.89197	121.818
1	428	1650	1	94.3673	493.849	815.402	222.946
1	429	1272	0	39.1431	346.453	6.2322	158.403
1	430	1381	0	46.2774	387.841	6.81262	170.562
1	431	1182	0	51.7008	352.235	6.19844	143.967
1	432	1140	0	36.7581	368.269	6.12679	137.888
1	433	1338	1	50.3569	399.284	400.369	170.136
1	434	1684	1	91.4442	494.403	772.218	239.735
1	435	1689	1	68.9083	479.54	779.478	229.58
1	436	1548	1	95.9063	466.05	644.058	201.451
1	437	1658	0	42.503	381.107	10.0829	191.66
1	438	1635	0	43.2589	346.737	7.89906	193.923
1	439	1392	0	46.0737	412.222	6.94713	170.129
1	440	1562	0	39.779	376.134	9.54302	180.298
1	441	1202	0	64.9814	294.622	139.441	150.339
1	442	1656	1	63.9784	508.124	935.89	240.606
1	443	1498	1	77.9052	479.684	917.462	202.966
1	444	1138	0	37.136	361.951	6.32087	135.938
1	445	1290	0	54.0284	342.398	6.67985	158.365
1	446	1306	0	77.8453	391.451	18.554	156.933
1	447	1424	1	110.068	450.944	825.672	221.477
1	448	1339	0	36.5972	363.534	14.7342	159.759
1	449	1193	0	40.5888	381.258	21.5348	143.615
1	450	1235	0	205.127	420.84	7.31939	153.951
1	451	1505	1	111.117	470.112	835.253	229.281
1	452	1290	0	43.4311	363.151	8.17781	148.934
1	453	1392	0	67.7803	398.395	7.68911	164.969
1	454	2018	0	84.8112	682.763	10.447	244.34
1	455	1230	0	48.5878	364.579	6.5548	143.614
1	456	1288	0	73.8976	351.654	7.05449	151.672
1	457	1167	0	61.6667	269.689	6.09859	140.66
1	458	1662	1	143.066	497.777	936.057	223.013
1	459	1202	0	53.2779	359.483	6.17409	143.714
1	460	1239	0	49.124	358.597	6.41186	148.574
1	461	1331	1	54.4075	440.644	723.601	175.121
1	462	1534	0	50.1212	409.864	8.1201	179.965
1	463	1232	0	41.0202	370.174	6.75564	145.83
1	464	3421	1	237.677	1054.31	1940.68	515.308
1	465	1030	1	42.4165	238.801	353.094	131.552
1	466	1058	1	33.5548	254.028	440.005	134.159
1	467	1530	1	66.0963	488.565	840.908	200.448
1	468	2117	1	104.144	580.116	539.098	268.879
1	469	1316	0	54.041	363.464	8.5346	153.173
1	470	1269	0	52.1767	363.838	6.96579	151.615
1	471	1319	0	50.6434	396.089	12.0315	153.299
1	472	1671	1	85.4152	497.505	813.044	213.797
1	473	1070	1	46.4699	253.147	380.477	132.631
1	474	2394	0	139.922	668.474	13.8325	293.346
1	475	1212	0	49.585	371.74	15.3275	141.746
1	476	2179	1	214.421	565.245	555.414	274.397
1	477	1084	1	38.9091	328.081	158.974	128.383
1	478	2429	0	144.296	753.706	13.243	284.289
1	479	2923	1	150.275	955.762	1753.7	470.28
1	480	2630	0	103.643	876.7	13.6194	309.666
1	481	1557	0	54.0889	381.412	8.37206	184.667
1	482	1362	0	56.3829	382.85	8.76632	160.54
1	483	1190	0	60.2982	341.483	7.24076	136.581
1	484	1279	0	35.1156	324.937	6.5324	153.835
1	485	1085	0	33.1842	357.415	6.13278	122.89
1	486	1343	0	82.291	380.333	8.34667	157.04
1	487	1362	0	41.7897	364.983	10.3135	163.233
1	488	1411	1	107.441	522.692	751.314	1192.2
1	489	1216	0	48.0704	361.568	6.84154	140.213
1	490	1094	0	37.8457	348.448	6.33237	128.517
1	491	1482	0	77.2786	384.575	8.70864	175.348
1	492	1355	0	44.5618	360.855	7.19739	161.414
1	493	1354	0	85.9653	383.83	7.54327	158.495
1	494	1179	0	45.5047	357.997	6.7295	134.412
1	495	2043	1	77.6078	550.066	769.487	298.727
1	496	1303	0	50.9988	343.779	7.63177	157.27
1	497	1429	0	73.8602	381.991	9.32769	172.644
1	498	3392	0	127.743	1048.58	23.4364	409.569
1	499	1361	1	51.8565	336.034	456.89	172.253
1	500	2225	1	86.845	606.686	808.758	321.726
1	501	1092	0	38.8589	349.303	31.7433	128.932
1	502	1829	1	91.2629	538.776	860.496	251.535
1	503	1109	0	38.0614	348.502	6.13179	128.868
1	504	2169	1	88.8813	603.744	815.635	288.298
1	505	1587	1	70.0938	482.919	918.222	197.349
1	506	1548	0	43.0273	375.215	7.98647	181.624
1	507	1124	1	48.7629	272.591	480.128	143.006
1	508	2979	1	139.873	808.557	1024.58	374.971
1	509	2161	1	88.8125	588.153	805.844	297.491
1	510	1568	1	135.743	573.194	1090.25	215.123
1	511	1524	1	64.5605	510.502	787.673	180.185
1	512	1329	0	46.4314	384.973	61.3408	147.747
1	513	1620	1	111.954	562.966	1109.7	221.859
1	514	1647	0	74.0063	403.027	9.22135	192.869
1	515	2307	0	64.805	711.257	12.1613	257.847
1	516	1516	1	128.509	547.926	1113.93	216.225
1	517	1997	1	77.2408	541.182	800.833	296.291
1	518	2280	1	81.6327	584.459	788.696	280.577
1	519	1561	1	124.734	562.234	1138.14	245.988
1	520	1572	1	98.8726	516.97	1005.18	217.698
1	521	1578	0	87.9971	379.825	8.43012	169.548
1	522	1098	0	37.9644	359.642	8.1612	118.595
1	523	1492	0	65.019	415.149	8.29281	174.323
1	524	1140	0	36.6678	359.469	6.28399	122.923
1	525	1776	1	89.3395	527.574	799.446	235.353
1	526	1002	0	40.199	330.657	175.548	114.564
1	527	1178	0	36.783	367.627	6.5465	126.395
1	528	1206	0	52.3421	290.225	7.69204	137.591
1	529	2674	0	168.417	750.379	14.3859	294.516
1	530	1402	0	56.0966	363.797	7.85582	164.457
1	531	1403	0	39.3336	379.751	7.67358	161.536
1	532	1161	0	42.946	366.695	7.60139	122.545
1	533	2293	0	134.028	719.939	12.9849	266.576
1	534	1480	0	50.39	387.661	8.09003	172.956
1	535	1074	1	34.8883	271.276	455.554	120.748
1	536	1057	0	39.9096	278.267	406.728	138.258
1	537	1305	0	48.7213	400.949	71.0224	137.319
1	538	1516	0	70.6103	349.978	8.09621	176.351
1	539	2386	0	154.707	717.298	16.6296	253.455
1	540	1788	0	50.8938	418.631	10.1724	209.771
1	541	2174	1	89.1379	645.36	1222.46	253.989
1	542	1875	1	113.366	554.064	903.823	246.668
1	543	2414	1	85.7628	682.044	880.061	336.06
1	544	1082	0	36.3415	361.044	6.6855	118.775
1	545	966	1	42.5435	261.016	452.223	109.301
1	546	2283	1	87.8579	628.443	809.014	290.67
1	547	2692	2	125.465	768.605	1433.26	308.155
1	548	2064	1	121.185	577.947	820.593	292.459
1	549	1535	1	82.6555	494.718	733.588	181.936
1	550	1619	0	44.1194	408.742	8.55998	185.657
1	551	1370	0	40.7567	366.452	8.22237	156.199
1	552	1612	1	72.2562	518.149	960.73	211.848
1	553	1002	1	41.2076	275.383	515.986	113.033
1	554	1652	1	71.1059	526.19	837.345	196.33
1	555	2324	1	81.9663	681.024	865.195	282.9
1	556	1511	0	67.1877	362.502	8.50774	172.896
1	557	1302	0	44.4661	369.162	7.07135	142.628
1	558	1137	0	45.1074	377.228	7.02296	118.205
1	559	2283	0	79.677	762.78	12.4884	255.059
1	560	2948	1	334.485	1051.12	1956.62	395.429
1	561	1019	1	52.0682	275.391	524.371	113.86
1	562	2723	0	159.013	656.953	256.541	311.043
1	563	1209	0	49.5514	382.136	8.03514	124.964
1	564	1524	0	84.0685	410.278	8.61482	176.027
1	565	1023	0	41.3208	364.998	5.80203	118.736
1	566	1172	0	125.803	391.641	16.222	122.157
1	567	1474	0	60.314	390.916	8.13602	170.007
1	568	1201	0	66.4343	392.592	8.34015	122.62
1	569	1802	1	122.314	550.41	1021.9	225.27
1	570	1212	0	79.7768	393.368	8.82719	124.234
1	571	1097	0	62.4948	377.69	7.10008	111.491
1	572	1021	0	42.9337	367.66	5.82782	116.606
1	573	1028	0	52.5384	335.161	6.76132	111.501
1	574	1192	0	80.6795	396.959	7.83713	121.411
1	575	1134	0	48.1471	377.946	6.57488	127.832
1	576	1253	0	52.6497	381.409	7.27128	139.39
1	577	1690	0	176.602	423.975	9.56698	187.045
1	578	1580	0	84.6237	394.712	9.53915	176.777
1	579	1747	0	103.799	456.108	210.78	202.395
1	580	1384	0	76.0871	431.362	9.44573	149.145
1	581	1186	0	49.1652	400.693	7.63973	120.293
1	582	1521	0	46.7915	379.291	8.67796	171.777
1	583	1340	0	62.9261	399.471	10.6817	141.835
1	584	1409	0	48.2551	366.87	127.52	157.209
1	585	1071	0	99.866	358.055	6.77704	110.203
1	586	1401	0	60.307	412.626	12.3109	148.781
1	587	1482	0	45.9139	401.823	10.1497	162.127
1	588	1268	1	82.532	381.726	603.546	142.989
1	589	1642	1	74.579	577.674	1131.95	217.185
1	590	2532	0	153.302	807.784	17.8385	252.894
1	591	1304	0	47.8063	429.493	7.67811	131.6
1	592	1494	1	152.033	559.539	808.017	178.595
1	593	2413	1	98.5483	734.288	905.123	286.009
1	594	1745	1	93.4034	539.272	1019.97	193.913
1	595	1511	0	65.7577	422.189	11.5647	158.39
1	596	1818	0	186.067	456.252	11.0283	191.385
1	597	1270	0	45.0504	389.702	7.80745	135.069
1	598	2477	1	115.434	696.984	883.149	297.717
1	599	1132	1	43.7505	305.035	533.008	125.671
1	600	1362	0	51.4197	371.652	134.166	148.303
1	601	1290	0	149.253	433.762	7.82861	138.568
1	602	2581	0	256.046	818.316	16.0358	271.847
1	603	1880	1	123.487	623.846	1141.95	285.506
1	604	2001	1	114.764	634.483	876.988	232.429
1	605	1225	1	44.6778	333.275	609.952	138.202
1	606	1461	0	130.851	407.112	11.656	149.909
1	607	1299	0	66.0576	409.146	7.74614	129.715
1	608	1547	1	77.2064	418.857	480.317	182.23
1	609	1628	1	86.6058	563.873	1223.9	196.614
1	610	1438	0	209.111	390.983	28.5875	194.363
1	611	2123	1	186.98	654.924	1056.11	1833.28
1	612	1597	0	169.268	405.866	9.82089	169.184
1	613	2128	0	105.601	792.656	12.9566	229.614
1	614	1396	1	63.681	394.048	460.62	161.703
1	615	1537	0	137.103	404.852	10.1724	157.283
1	616	2107	1	134.837	633.066	1125.49	265.314
1	617	4164	1	417.971	1365.25	1857.39	494.039
1	618	1483	0	78.9583	349.756	8.51193	155.75
1	619	1176	0	49.6696	384.063	7.53709	111.491
1	620	2056	1	121.281	639.528	1063.37	282.353
1	621	1160	0	48.9022	322.821	7.90179	122.163
1	622	1354	0	122.038	378.847	8.72384	135.25
1	623	1107	0	43.2358	376.747	6.73646	106.604
1	624	1853	1	128.608	633.631	1220.98	1217.41
1	625	1286	1	46.9528	359.289	217.384	119.426
1	626	2299	1	236.018	700.485	970.669	255.447
1	627	2821	1	280.994	820.991	957.718	319.161
1	628	2746	0	124.451	776.136	16.4419	277.714
1	629	1396	0	55.3551	385.956	8.29265	123.284
2	1	1100	0	45.4099	305.625	5.37748	152.347
2	2	2060	0	46.3369	460.335	11.8961	287.14
2	3	2412	0	190.939	586.856	11.8238	349.135
2	4	1179	0	90.2878	283.886	8.05965	156.932
2	5	2031	0	54.7901	563.534	9.43383	291.241
2	6	1052	0	51.732	249.43	5.01941	147.24
2	7	1229	1	46.7745	402.308	530.906	193.899
2	8	3039	1	119.841	1007.64	1295.47	536.559
2	9	1191	0	34.3117	272.528	5.72894	172.127
2	10	1154	0	39.6875	314.229	5.35274	161.464
2	11	1772	1	80.0302	538.905	647.509	317.066
2	12	1474	1	58.0156	457.766	623.906	219.458
2	13	1424	0	83.4658	382.105	7.57855	199.692
2	14	990	0	38.8332	272.586	5.5541	141.312
2	15	1368	1	46.8	420.593	621.485	204.788
2	16	1612	1	59.7975	486.472	532.495	246.167
2	17	1267	0	45.9427	357.513	127.031	190.628
2	18	1219	0	39.7984	283.478	7.05951	176.789
2	19	1069	0	39.7627	329.694	6.08133	152.987
2	20	1224	0	28.8631	304.98	5.83972	171.33
2	21	2893	1	137.991	946.904	1225.37	456.028
2	22	1001	0	29.5224	293.068	6.68495	144.84
2	23	1544	1	63.9006	514.304	676.68	240.42
2	24	1345	1	65.1298	480.118	607.446	216.19
2	25	1821	1	91.3702	505.416	611.104	281.029
2	26	1374	0	94.7489	304.96	7.05542	199.516
2	27	1157	0	52.3986	313.043	6.14511	166.061
2	28	1867	1	159.452	727.04	1058.78	338.927
2	29	3452	1	260.354	1052.56	1396.66	520.733
2	30	2211	0	191.419	660.259	13.5772	316.099
2	31	3823	1	213.598	1168.1	1277.82	618.647
2	32	1078	0	76.2789	293.483	5.95329	155.397
2	33	1252	0	102.57	397.702	156.447	184.711
2	34	1418	1	89.732	463.219	647.27	226.863
2	35	1235	0	106.122	285.861	6.12598	178.668
2	36	1218	0	66.3525	402.473	179.015	178.692
2	37	1297	1	44.4844	409.84	281.981	189.979
2	38	1756	1	157.055	654.765	433.627	266.878
2	39	2742	0	266.538	919.12	367.629	403.509
2	40	1089	0	132.931	269.997	6.93913	149.213
2	41	1316	0	53.2339	351.771	6.33135	184.166
2	42	2303	0	68.5823	719.45	11.3125	328.816
2	43	1038	0	56.2478	310.441	5.59612	151.017
2	44	1236	0	49.5221	323.509	5.69445	170.399
2	45	966	0	36.6926	321.685	4.95526	135.651
2	46	1175	0	51.4612	325.588	5.59933	163.611
2	47	1696	1	48.4267	399.328	277.893	251.122
2	48	1284	0	36.8587	333.1	15.9949	174.888
2	49	1209	0	47.4787	324.287	14.9192	162.766
2	50	1065	1	40.7381	291.669	375.985	158.31
2	51	1105	1	64.8458	246.433	254.487	161.173
2	52	1034	1	41.1095	220.16	218.449	154.458
2	53	1111	0	53.8478	331.315	5.52242	155.345
2	54	2462	0	107.185	717.055	12.6733	345.584
2	55	3241	1	333.922	1167.24	1508.34	528.249
2	56	1060	1	42.1076	314.689	125.252	151.447
2	57	1134	0	46.7183	359.275	6.4365	160.806
2	58	984	1	39.7503	292.025	392.616	146.867
2	59	1404	0	122.15	320.763	7.72573	196.414
2	60	1723	1	78.3538	569.137	532.651	257.352
2	61	1903	0	64.9145	568.62	9.86358	274.021
2	62	1124	0	50.1376	325.379	6.44134	159.045
2	63	1082	1	59.5879	310.495	217.79	155.448
2	64	1190	0	50.148	296.539	6.12012	168.778
2	65	1169	0	63.2721	343.011	6.23227	166.346
2	66	1164	0	35.11	335.736	5.63481	159.013
2	67	1415	0	102.651	322.802	8.53617	196.32
2	68	964	0	31.4886	302.656	12.9225	136.359
2	69	976	0	41.7041	292.097	5.10967	138.892
2	70	1353	0	44.0679	408.145	7.16573	188.768
2	71	991	0	44.685	308.64	5.34995	139.849
2	72	1147	0	31.4527	298.675	5.68167	159.535
2	73	1988	1	112.59	588.988	648.157	330.191
2	74	1390	0	91.7382	347.028	7.22741	196.426
2	75	967	0	37.0733	305.259	57.2929	131.018
2	76	1097	1	47.6716	299.344	223.536	154.34
2	77	1736	1	71.3823	551.022	552.415	246.893
2	78	1045	1	49.9664	240.998	286.122	152.58
2	79	1088	0	94.5638	334.071	5.86105	146.382
2	80	2184	1	131.022	659.501	439.343	314.14
2	81	1001	1	56.2172	271.714	283.565	145.256
2	82	1124	1	38.5444	277.094	136.406	153.145
2	83	1002	1	42.9675	237.021	288.891	145.85
2	84	1695	0	41.7417	378.359	8.25489	234.724
2	85	1773	0	83.8322	637.959	9.19615	233.141
2	86	1005	1	61.7306	281.328	300.41	145.175
2	87	1515	0	113.008	371.375	98.3236	208.319
2	88	984	0	36.3729	318.14	8.95711	132.455
2	89	1241	0	134.826	363.452	6.44208	160.765
2	90	1556	0	39.7763	362.131	7.52346	208.57
2	91	981	0	32.5067	304.928	5.54531	135.223
2	92	1036	0	35.2263	309.557	56.1388	134.62
2	93	2325	0	157.311	703.499	14.5244	311.751
2	94	1502	0	99.4699	374.473	104.67	202.388
2	95	1643	1	93.6257	473.41	634.405	247.888
2	96	1694	1	81.9716	583.856	693.815	260.699
2	97	2194	0	72.5805	636.004	33.6054	294.332
2	98	1714	1	74.67	537.505	615.175	244.469
2	99	1564	1	161.569	522.939	689.397	229.559
2	100	1109	0	45.4997	307.9	12.909	147.956
2	101	990	0	55.4363	336.776	5.71701	138.671
2	102	1107	0	36.8105	317.956	6.07941	146.033
2	103	1091	0	52.5664	330.223	6.44125	137.374
2	104	1158	0	49.7698	360.864	6.20645	150.036
2	105	982	0	49.6892	299.196	5.31557	128.254
2	106	1111	0	47.1832	347.107	5.89557	149.122
2	107	1767	1	124.168	488.364	733.463	250.59
2	108	1110	0	67.0403	326.454	6.0517	143.531
2	109	971	1	67.9566	234.133	278.663	134.097
2	110	1025	1	44.2343	248.613	341.098	149.463
2	111	1455	0	37.7389	356.968	7.09546	190.975
2	112	1464	1	73.7534	474.27	577.741	216.424
2	113	1102	0	41.4873	323.698	7.30686	144.586
2	114	1681	1	71.9445	493.269	688.98	236.844
2	115	1767	1	166.973	584.72	694.28	254.373
2	116	996	1	52.8575	233.816	249.263	133.544
2	117	2775	1	197.839	1050.77	1256.69	435.57
2	118	1924	0	94.2637	686.491	31.7034	262.227
2	119	1643	1	126.277	521.648	673.996	236.09
2	120	1056	1	65.0326	292.363	445.053	151.284
2	121	1034	2	98.3735	268.143	342.612	141.743
2	122	1567	0	40.5142	382.143	7.77507	215.492
2	123	1469	1	66.8225	433.982	412.046	202.534
2	124	1252	0	55.0941	335.102	7.90626	170.251
2	125	1400	1	54.5161	460.865	650.609	184.023
2	126	964	1	58.1211	237.155	263.452	128.353
2	127	1129	0	39.3814	322.723	9.09871	144.394
2	128	1110	0	37.565	333.889	5.6331	135.698
2	129	1245	0	47.4428	324.147	22.4826	160.025
2	130	1665	1	118.168	570.225	718.086	228.214
2	131	1312	0	76.9482	347.372	6.95331	161.867
2	132	1276	0	51.7288	359.036	6.72384	172.229
2	133	1961	1	107.413	528.096	583.502	244.777
2	134	1309	0	51.9865	369.312	6.84511	165.943
2	135	1269	0	92.3485	331.139	6.96623	163.407
2	136	1516	1	65.0683	511.723	445.592	201.263
2	137	2417	0	145.049	704.68	13.2067	299.699
2	138	1207	0	42.3902	361.326	6.234	159.274
2	139	1185	0	66.5185	357.395	9.38369	139.532
2	140	1110	0	44.6348	334.925	6.16686	149.117
2	141	1240	0	62.2817	344.017	7.66523	160.3
2	142	1246	0	66.3515	356.745	6.79179	159.336
2	143	2631	0	194.64	759.848	14.2684	333.169
2	144	1022	1	66.4101	290.409	210.044	131.429
2	145	2865	1	167.884	969.396	1388.2	428.617
2	146	1340	0	94.7171	352.857	7.05873	169.751
2	147	1166	0	46.4649	299.678	6.16863	144.708
2	148	991	0	50.2638	321.539	5.95065	124.391
2	149	2266	0	86.0447	646.922	13.1014	283.868
2	150	2518	1	200.965	940.738	1336.92	358.165
2	151	1227	0	54.5213	339.965	6.90663	151.559
2	152	1093	0	43.4157	310.819	6.70221	133.401
2	153	1638	1	71.2352	474.198	593.211	224.715
2	154	1941	1	92.9611	543.04	446.429	253.392
2	155	1434	0	38.7904	306.101	7.65756	177.987
2	156	1233	0	35.6807	311.77	6.49941	151.337
2	157	1091	0	46.6531	354.973	6.41515	143.67
2	158	1271	0	88.6682	329.955	7.22263	157.094
2	159	1028	1	46.7959	241.937	277.816	131.116
2	160	1467	0	47.6535	327.648	8.44199	183.03
2	161	1092	0	50.7314	334.318	7.62113	142.578
2	162	1433	0	124.431	412.651	105.758	174.246
2	163	1780	1	75.3003	795.81	597.517	219.544
2	164	1620	1	97.3551	501.115	713.88	254.901
2	165	1855	1	163.694	548.041	703.887	264.36
2	166	1533	0	97.7144	387.71	8.66386	202.457
2	167	1443	1	140.069	587.562	800.173	229.184
2	168	1844	0	99.6667	673.248	10.5762	238.07
2	169	1516	0	107.034	386.27	8.53365	199.588
2	170	967	1	49.8535	231.102	272.696	122.132
2	171	1692	0	48.1352	363.9	9.47732	221.578
2	172	1327	0	48.8483	372.386	10.1887	151.69
2	173	1164	1	72.2565	332.847	375.51	151.575
2	174	1915	0	93.4736	717.025	10.9563	249.515
2	175	1586	1	230.674	485.531	684.083	216.909
2	176	1070	0	48.4777	346.506	8.3509	125.12
2	177	1187	0	38.1216	325.398	6.98328	144.546
2	178	1047	0	57.2923	327.453	5.99599	124.104
2	179	1565	1	78.3594	451.438	413.773	206.466
2	180	1103	0	70.1699	361.669	6.03714	131.198
2	181	2076	1	152.365	506.012	475.19	261.98
2	182	1102	0	46.7254	345.079	6.70074	128.154
2	183	1021	1	53.0563	296.1	157.672	127.14
2	184	1298	1	65.894	338.75	361.154	166.836
2	185	1168	0	92.4691	313.821	6.57685	146.525
2	186	1505	0	94.9624	428.659	137.242	200.735
2	187	1457	0	121.911	418.874	129.235	191.544
2	188	2635	0	131.748	764.788	17.6236	330.169
2	189	1110	0	62.9226	328.865	6.4238	144.706
2	190	1294	0	72.4448	395.302	7.46551	169.249
2	191	1687	1	76.2199	573.696	839.4	310.519
2	192	1211	0	113.194	310.274	7.42028	145.423
2	193	2507	0	112.95	691.956	17.277	303.13
2	194	1813	1	86.3308	593.669	734.016	236.776
2	195	2753	1	192.88	959.422	1261.8	405.194
2	196	1261	0	60.3697	356.837	6.91754	158.116
2	197	1025	1	145.784	251.895	316.234	122.659
2	198	1414	0	104.469	367.382	9.06807	177.176
2	199	1068	1	41.7123	277.257	298.18	134.883
2	200	1339	0	50.7114	277.469	7.83935	159.806
2	201	1195	1	41.6066	277.935	281.412	146.881
2	202	1305	0	88.519	352.851	7.70285	163.041
2	203	1829	1	118.672	529.251	562.706	214.531
2	204	1426	1	65.3255	420.54	198.93	176.074
2	205	1063	0	39.9049	325.346	25.4462	130.635
2	206	1806	1	160.306	527.488	627.592	243.483
2	207	1009	0	37.2445	335.155	6.41309	114.875
2	208	2198	0	150.788	737.03	12.9924	275.716
2	209	1499	0	117.179	369.314	9.71569	180.626
2	210	1798	1	160.365	535.325	690.48	264.346
2	211	2170	0	127.659	665.698	12.1208	263.049
2	212	991	1	113.124	256.939	324.118	117.145
2	213	1246	0	64.2949	359.347	7.90893	149.952
2	214	1209	0	61.9054	351.534	6.91205	137.418
2	215	2002	1	89.6155	600.307	702.781	279.473
2	216	1500	0	39.7558	343.358	8.04147	165.84
2	217	1243	0	69.7968	382.433	7.24715	139.319
2	218	1384	1	59.3441	469.392	686.919	166.876
2	219	3009	0	90.967	750.25	16.1338	334.181
2	220	1092	0	48.2258	383.445	6.8681	134.667
2	221	1310	0	35.8011	341.226	7.24189	144.265
2	222	1841	1	75.6938	540.353	434.614	224.785
2	223	1484	1	66.7037	454.251	592.474	189.852
2	224	1138	0	49.8277	357.827	6.72834	139.989
2	225	1157	0	43.9911	361.576	27.457	139.107
2	226	1277	0	55.4735	387.306	7.21573	155.106
2	227	1587	1	74.694	498.092	643.508	204.13
2	228	1331	0	56.7272	392.707	7.42144	160.522
2	229	1413	1	87.6993	499.289	450.399	174.437
2	230	1650	1	75.0292	530.101	669.473	206.206
2	231	1129	0	46.5366	345.08	7.11873	133.131
2	232	1132	0	92.5672	316.125	6.63296	133.309
2	233	1022	0	38.1106	286.99	79.3732	121.655
2	234	1105	0	58.4275	351.947	6.40845	135.104
2	235	1861	1	83.3685	520.084	503.674	227.207
2	236	1097	0	55.3641	358.725	6.37572	133.702
2	237	1921	0	185.173	701.565	23.4036	229.653
2	238	1046	0	63.2313	330.773	26.6634	124.054
2	239	2195	0	120.131	772.221	12.9203	252.347
2	240	1645	1	73.7526	512.911	613.425	209.845
2	241	1463	0	53.5239	375.128	45.8521	172.14
2	242	1060	0	34.5633	323.244	7.40587	124.638
2	243	1040	0	32.1205	346.068	39.2915	126.044
2	244	1164	0	80.9584	373.024	6.73382	133.997
2	245	1419	1	186.816	633.138	410.04	180.907
2	246	1383	0	39.9194	324.214	8.95041	164.227
2	247	1004	0	41.9223	343.178	5.67649	106.576
2	248	1237	0	63.5496	372.716	7.51986	147.297
2	249	1585	1	70.1166	488.417	642.061	199.874
2	250	1203	0	79.8353	373.709	7.13188	141.047
2	251	1318	0	83.0594	343.941	7.88817	154.16
2	252	1266	0	130.085	382.315	7.08321	139.131
2	253	1065	0	34.8855	314.361	6.57594	121.443
2	254	1210	0	50.0181	370.734	6.79686	139.856
2	255	1240	0	61.2817	373.832	7.65008	146.547
2	256	1982	1	103.674	625.01	201.65	230.044
2	257	1139	1	47.1728	329.511	97.9601	133.169
2	258	1161	0	38.2891	343.63	6.90858	131.302
2	259	1084	0	40.9816	333.342	41.5821	120.442
2	260	982	0	50.1083	312.873	93.9551	113.684
2	261	1370	0	89.735	343.6	7.8256	157.21
2	262	1550	1	83.1694	494.943	677.388	191.985
2	263	1365	0	35.7171	375.96	7.37618	153.515
2	264	1595	1	62.6919	521.395	752.06	215.016
2	265	1183	0	54.7355	354.498	7.26551	132.28
2	266	1128	0	73.1499	341.017	7.47099	121.268
2	267	1434	1	68.2695	507.056	713.569	184.268
2	268	1030	0	43.7566	346.266	5.78607	107.581
2	269	1181	0	37.8089	336.094	7.34255	131.521
2	270	1598	1	137.684	517.363	658.094	211.492
2	271	1027	0	45.0468	348.431	5.73664	107.52
2	272	1301	1	49.8615	422.357	291.461	149.972
2	273	1468	1	69.5454	483.765	712.648	166.334
2	274	1380	1	64.7614	489.005	667.901	165.064
2	275	1108	0	225.185	339.036	6.41166	117.694
2	276	1621	1	224.191	523.041	684.663	208.7
2	277	2141	1	115.565	690.557	712.546	257.032
2	278	2111	0	112.216	646.066	13.6345	220.681
2	279	1807	1	124.844	551.554	734.735	226.215
2	280	1142	0	52.6454	369.233	56.0035	126.894
2	281	1317	0	68.0539	382.449	23.2372	136.644
2	282	1688	1	135.129	479.89	666.833	230.846
2	283	1014	0	47.6872	339.228	5.66003	100.875
2	284	1498	1	62.9847	447.751	704.876	162.474
2	285	3301	1	157.73	1066.21	1258.12	397.051
2	286	1611	1	68.8449	491.285	680.772	181.346
2	287	2304	0	117.098	701.259	12.5156	247.481
2	288	1571	1	76.6631	498.022	704.97	187.786
2	289	2014	0	128.099	656.043	13.3907	219.072
2	290	2094	1	106.309	504.899	559.908	248.439
2	291	1321	0	36.6668	352.852	7.37017	146.921
2	292	1474	1	68.1253	554.397	290.281	177.718
2	293	1182	0	41.2075	329.926	6.68798	134.067
2	294	1255	0	38.7815	332.267	6.36057	144.344
2	295	1175	1	44.3936	366.116	235.444	142.991
2	296	1099	0	65.3561	294.775	7.04314	130.498
2	297	1377	1	75.4631	364.58	231.407	164.349
2	298	1101	0	35.174	319.492	83.2811	138.207
2	299	1235	0	35.5871	331.139	5.72293	155.958
2	300	1063	0	32.3839	289.625	5.44369	129.048
2	301	1780	0	185.028	555.956	8.8464	233.218
2	302	1023	2	48.2611	261.915	290.695	141.207
2	303	1681	1	65.3015	480.843	442.619	240.362
2	304	1842	1	80.5664	522.485	363.606	250.641
2	305	1122	0	78.9692	331.408	5.22889	147.708
2	306	1390	1	127.941	438.148	356.543	194.113
2	307	1734	1	79.3206	487.732	442.069	252.309
2	308	1547	1	88.1887	448.94	510.979	218.163
2	309	2101	0	108.818	545.655	10.2545	271.219
2	310	1478	1	55.6537	456.942	502.993	213.073
2	311	1146	0	39.4951	303.799	5.94104	145.61
2	312	2264	0	93.6894	653.403	10.5615	292.469
2	313	1310	1	51.46	394.579	479.015	187.135
2	314	1129	0	32.4294	321.479	5.32058	144.043
2	315	1154	0	41.2111	303.504	7.14307	144.714
2	316	2655	0	179.251	806.137	14.7218	355.108
2	317	1618	0	177.956	521.419	8.19535	213.147
2	318	1298	0	71.2298	321.701	6.75526	173.169
2	319	1194	0	48.0352	312.825	6.10062	154.64
2	320	1521	1	85.8384	499.579	473.968	241.659
2	321	1533	1	78.4591	455.466	529.492	270.155
2	322	1219	0	52.5453	333.585	6.38251	157.541
2	323	1759	1	82.0224	502.075	363.454	230.114
2	324	1137	0	78.0932	301.757	6.74759	147.608
2	325	3029	1	258.037	1110.65	510.892	396.159
2	326	1968	1	78.2817	520.443	567.953	271.206
2	327	1204	0	50.2626	338.631	5.94525	155.78
2	328	2321	0	84.373	705.915	10.8537	300.818
2	329	1463	0	58.9206	476.305	517.861	197.758
2	330	1450	0	35.8025	344.973	6.58711	189.039
2	331	1271	0	48.395	382.866	123.226	171.577
2	332	1212	0	44.4894	328.999	5.85762	155.618
2	333	1816	0	88.7348	649.151	11.0314	226.537
2	334	1159	0	33.1385	346.878	5.63236	152.18
2	335	988	2	41.3755	258.007	269.741	134.261
2	336	1321	0	32.0347	329.697	5.95857	161.668
2	337	1338	0	33.3638	339.821	6.0462	175.913
2	338	1669	1	93.4645	504.694	517.3	238.662
2	339	1031	1	59.1928	247.697	255.198	143.459
2	340	1001	0	40.0545	320.806	25.0217	127.737
2	341	1693	0	88.808	736.37	9.76759	218.632
2	342	1302	0	36.2488	336.818	5.97131	169.793
2	343	2238	0	106.359	691.53	11.0992	285.572
2	344	987	0	39.676	330.875	26.8168	126.155
2	345	1508	0	67.8884	395.03	89.1384	189.447
2	346	1006	1	57.2159	260.458	277.816	135.917
2	347	1711	1	111.784	504.908	534.149	255.698
2	348	1756	1	81.6353	553.188	417.156	236.143
2	349	2239	0	73.2139	689.817	10.3215	289.466
2	350	2180	0	68.6492	635.248	10.854	271.59
2	351	1277	1	127.916	468.245	493.246	179.212
2	352	1240	1	44.7947	262.577	214.424	159.97
2	353	1177	1	41.958	269.292	234.287	149.681
2	354	3165	1	165.096	980.123	846.392	426.587
2	355	1958	0	88.9319	650.286	9.35433	233.056
2	356	1487	1	77.0034	494.543	499.01	200.314
2	357	1486	0	80.1095	366.073	7.65255	187.51
2	358	1074	1	46.6692	284.214	238.923	143.419
2	359	1065	1	55.3783	256.196	227.205	139.24
2	360	1252	0	32.4508	320.995	5.98952	153.145
2	361	2277	1	121.722	584.285	479.804	301.529
2	362	1545	1	62.3806	454.905	302.526	209.141
2	363	1085	0	34.0193	332.844	5.93573	136.269
2	364	1701	1	74.6253	550.976	463.408	225.785
2	365	2565	1	168.417	989.759	995.108	366.468
2	366	1200	0	37.4952	364.911	6.43967	150.653
2	367	1555	1	53.1244	455.736	273.821	201.455
2	368	1040	0	37.377	337.466	4.80827	130.881
2	369	1593	0	68.144	391.591	7.30726	199.807
2	370	1005	0	46.4025	280.377	4.83946	118.532
2	371	1410	0	43.0662	394.643	49.3673	177.41
2	372	1304	0	33.0208	340.257	5.9494	162.583
2	373	2719	0	309.308	783.324	158.449	341.436
2	374	1071	0	32.2718	319.238	5.25844	132.742
2	375	1361	0	71.94	420.927	7.00804	160.542
2	376	1106	0	120.457	337.929	5.70401	138.922
2	377	971	1	75.7788	263.497	266.639	128.548
2	378	1663	0	43.1721	370.704	7.4471	206.469
2	379	1213	1	54.8262	311.293	246.492	160.781
2	380	967	1	63.5193	257.138	260.396	127.385
2	381	1548	1	54.8035	491.398	483.096	201.627
2	382	1901	1	80.3969	533.194	536.252	290.212
2	383	2298	0	98.2672	739.881	11.8733	278.521
2	384	1548	0	40.9596	360.836	7.02228	188.2
2	385	1081	0	40.0075	344.077	5.10059	127.542
2	386	5926	1	302.809	1731.59	664.197	751.917
2	387	1558	1	81.0411	511.089	540.3	201.556
2	388	1720	1	75.0924	525.462	523.767	224.883
2	389	1653	1	59.3717	531.019	541.137	217.087
2	390	2475	0	228.676	819.62	13.1149	309.264
2	391	1014	0	31.3157	312.174	4.71356	120.683
2	392	1200	0	70.3239	312.365	6.52808	146.712
2	393	1307	0	99.4358	340.369	6.86932	160.255
2	394	1841	1	92.6291	534.91	573.27	233.888
2	395	1521	1	85.8862	501.878	523.857	199.612
2	396	1101	1	42.6495	281.491	262.824	138.571
2	397	1760	1	98.7369	588.927	524.998	251.485
2	398	1627	1	82.9734	521.902	578.257	230.252
2	399	1205	0	42.4421	731.973	6.96262	142.888
2	400	1102	0	85.6197	348.93	6.05748	137.254
2	401	2222	0	118.226	692.619	11.2693	274.572
2	402	1343	0	38.4887	360.69	10.489	161.126
2	403	1111	0	37.8066	347.228	6.54701	135.163
2	404	1459	1	99.2367	489.333	480.779	182.137
2	405	3135	1	275.314	1074	1110.6	405.334
2	406	1785	1	92.8711	572.759	522.91	238.864
2	407	1565	1	86.5362	566.609	552.244	212.273
2	408	1664	1	176.424	486.422	360.393	242.542
2	409	1440	0	37.9956	350.857	6.65193	169.049
2	410	2756	0	134.411	748.431	13.5928	341.602
2	411	1307	0	48.387	337.809	23.0231	160.496
2	412	1306	0	48.9015	359.135	8.84305	167.281
2	413	2880	0	117.743	1026.27	14.1733	337.69
2	414	1285	0	50.6285	329.664	22.1731	157.327
2	415	2127	1	145.944	617.87	307.245	264.823
2	416	1321	0	54.2761	377.684	6.36243	154.322
2	417	1045	0	40.7393	345.613	5.27323	124.532
2	418	1043	1	92.813	243.39	218.042	128.51
2	419	1313	0	98.2587	363.305	6.71585	160.544
2	420	992	0	55.4541	340.523	24.931	123.078
2	421	2320	1	92.5763	646.312	265.735	275.609
2	422	1168	0	37.3219	330.407	5.84239	147.707
2	423	1576	1	60.949	505.778	492.805	201.105
2	424	1670	0	87.5708	451.701	7.8323	191.279
2	425	2439	0	109.414	669.786	11.8455	299.335
2	426	1545	1	145.029	427.668	128.75	184.989
2	427	1148	0	96.0873	329.198	7.74228	133.981
2	428	2202	0	121.302	718.207	11.0465	273.005
2	429	1112	0	95.5262	264.544	5.32866	126.994
2	430	1354	0	45.4475	360.177	6.69873	174.028
2	431	1621	1	70.8779	524.344	573.003	204.473
2	432	1555	1	119.556	431.148	131.193	184.586
2	433	3247	1	220.369	973.838	1024.11	405.972
2	434	1268	0	63.6989	361.45	6.49082	157.707
2	435	1233	0	37.4503	344.398	6.07958	158.787
2	436	1565	1	94.849	504.54	488.801	203.332
2	437	1609	1	75.7592	532.549	552.293	230.452
2	438	1206	0	148.778	310.639	6.30159	140.862
2	439	2253	0	149.271	687.91	16.2926	256.834
2	440	1245	0	167.301	447.546	6.88768	146.438
2	441	1859	1	74.3449	556.832	534.841	236.825
2	442	1194	0	51.6639	336.092	6.22316	145.975
2	443	2809	0	102.404	761.826	13.9032	339.509
2	444	2509	0	381.064	799.035	13.6133	291.276
2	445	1358	0	355.672	367.217	7.30718	159.868
2	446	1409	0	93.1294	600.325	7.56773	167.588
2	447	1563	1	102.287	515.048	497.793	209.227
2	448	2786	1	156.171	836.817	535.876	354.993
2	449	997	0	28.4911	306.966	4.6197	119.117
2	450	1321	0	52.1895	372.307	6.47985	154.779
2	451	2136	1	228.978	637.841	606.8	311.66
2	452	1420	1	66.1026	455.88	220.772	166.187
2	453	2033	1	76.2521	539.538	482.668	235.281
2	454	1416	0	121.4	382.189	6.80436	157.7
2	455	1013	0	31.8687	353.93	4.97948	112.035
2	456	4806	0	306.258	2019.32	24.6632	558.742
2	457	1845	1	171.689	522.414	501.867	245.795
2	458	2131	0	144.851	714.714	10.7209	244.119
2	459	1077	1	39.0504	275.377	243.728	127.548
2	460	1312	0	65.4509	360.466	6.53506	150.588
2	461	1973	1	87.3699	565.012	488.373	237.757
2	462	1984	0	127.341	669.59	9.81173	226.801
2	463	1217	0	40.4612	364.358	6.59715	150.537
2	464	2563	0	165.499	729.106	13.3799	309.617
2	465	1365	1	113.35	508.222	529.725	187.124
2	466	1589	1	67.6341	519.333	484.296	186.27
2	467	1221	0	71.4322	354.839	5.97675	140.786
2	468	1330	1	134.537	496.541	522.715	183.15
2	469	1131	0	70.0385	343.085	5.38755	130.28
2	470	1645	0	69.0653	382.688	8.65341	185.874
2	471	1272	0	37.887	332.267	6.88861	154.407
2	472	1326	0	50.1505	372.08	7.45692	162.783
2	473	1745	1	81.6235	536.609	516.444	209.281
2	474	1207	0	57.2529	367.625	6.27102	141.912
2	475	1283	0	42.3648	409.72	104.596	152.04
2	476	1153	0	50.8282	333.837	5.89769	135.9
2	477	1055	0	42.6487	329.783	6.04053	116.3
2	478	1324	1	64.1321	353.662	325.646	172.427
2	479	1368	0	114.558	372.213	9.07243	170.388
2	480	1052	0	33.4179	362.016	5.33028	118.949
2	481	1316	1	93.7499	336.02	312.007	171.391
2	482	1359	0	50.0213	378.303	7.08411	164.872
2	483	1187	0	48.5919	427.095	5.8208	137.396
2	484	1306	0	53.232	385.599	6.53753	143.373
2	485	1105	0	44.1962	340.872	5.42449	126.029
2	486	1021	0	41.1476	366.546	5.08299	110.076
2	487	1039	0	31.9661	354.903	5.4027	121.899
2	488	1800	1	79.6328	562.756	542.96	238.282
2	489	2062	1	111.647	645.188	269.651	260.184
2	490	1918	0	88.6824	676.897	9.357	220.315
2	491	1688	1	137.621	503.654	214.653	208.343
2	492	1219	0	57.5888	348.444	6.06189	137.209
2	493	1558	0	132.027	390.7	7.93944	180.879
2	494	3359	1	299.649	976.632	956.704	451.126
2	495	1288	0	56.8748	363.638	7.24752	158.617
2	496	1179	1	44.6634	345.636	284.05	145.832
2	497	1427	0	37.1598	355.596	6.96815	161.38
2	498	2496	0	112.905	768.402	14.0306	310.567
2	499	1641	0	122.649	461.515	11.978	195.166
2	500	1065	1	68.2906	275.91	243.495	126.751
2	501	1233	0	89.4373	299.951	6.56823	145.297
2	502	1986	1	83.9334	579.833	512.645	233.277
2	503	1610	1	143.614	534.611	265.428	199.703
2	504	1379	0	40.0756	363.047	7.66668	167.64
2	505	1009	0	86.8215	325.076	263.388	124.086
2	506	1283	1	86.6835	360.5	171.204	161.321
2	507	1651	1	193.437	535.846	522.963	235.93
2	508	1258	0	192.075	387.326	11.2792	146.227
2	509	1086	0	51.1431	351.153	6.44431	119.564
2	510	1192	0	59.4977	360.324	9.325	129
2	511	1197	1	85.6194	298.907	256.817	141.369
2	512	1282	0	33.9165	343.83	6.23819	144.335
2	513	3042	0	267.305	1144.97	17.1481	349.981
2	514	1276	0	61.7619	382.55	10.5388	140.483
2	515	1228	1	54.9415	335.136	257.443	149.02
2	516	2785	1	224.554	868.144	524.328	355.858
2	517	1396	0	53.758	370.8	7.72854	166.979
2	518	1488	1	86.047	536.139	517.752	178.651
2	519	1828	1	89.7703	537.514	538.89	242.702
2	520	1129	1	73.2266	339.556	269.131	134.98
2	521	1252	0	46.7696	385.112	6.46784	134.162
2	522	1830	0	202.585	606.432	9.90605	199.426
2	523	1305	0	58.2629	369.879	29.7402	147.042
2	524	1077	0	187.801	341.478	6.33919	127.476
2	525	1208	0	53.0212	364.479	6.05303	134.446
2	526	1288	0	76.8512	366.605	6.65814	148.668
2	527	1867	1	73.8511	628.781	550.293	236.944
2	528	987	1	48.8816	279.346	251.405	113.267
2	529	1131	0	41.0851	353.217	5.67597	118.808
2	530	1555	0	214.813	429.344	7.97295	176.116
2	531	1778	1	94.7654	594.499	494.529	206.961
2	532	1897	1	76.7758	558.904	553.046	226.21
2	533	1273	1	99.4228	350.484	322.996	161.273
2	534	1041	0	46.2016	340.757	5.58842	115.239
2	535	1042	0	49.9388	343.965	5.87803	114.936
2	536	1033	1	43.5731	310.968	254.233	121.28
2	537	2019	0	81.061	693.589	10.4916	222.157
2	538	1291	0	45.5579	374.863	9.75552	156.827
2	539	1873	1	59.5656	619.645	584.586	247.21
2	540	1251	0	42.6042	353.943	7.1808	141.409
2	541	2037	0	204.888	717.474	10.7915	227.888
2	542	1695	1	89.3514	528.156	532.645	205.224
2	543	2426	0	121.3	747.149	12.6243	276.631
2	544	1237	0	129.518	328.551	6.64385	135.109
2	545	1272	0	53.4353	370.041	7.67967	136.98
2	546	1384	0	251.753	367.415	7.06438	156.395
2	547	1274	0	52.0824	358.798	7.26452	143.889
2	548	1227	1	46.2086	338.554	163.517	147.238
2	549	2884	0	270.06	802.825	16.0095	346.422
2	550	1585	1	85.7044	511.251	570.916	179.045
2	551	1893	0	71.3699	706.669	10.4413	209.566
2	552	1511	0	82.7962	444.274	98.3251	168.205
2	553	1130	0	103.943	349.056	6.01767	116.629
2	554	1255	1	81.593	308.103	272.146	146.343
2	555	1025	0	51.1052	356.066	5.44215	104.465
2	556	1177	0	50.1405	384.155	7.0305	122.929
2	557	1028	1	34.9153	321.739	139.776	107.512
2	558	1134	1	54.9064	312.146	262.836	126.592
2	559	1188	0	40.3867	381.581	6.56233	123.189
2	560	1256	0	54.8036	326.128	6.76826	142.882
2	561	1358	0	104.053	390.249	8.5077	149.532
2	562	1329	0	41.3966	364.056	7.17104	148.328
2	563	1598	1	72.9617	565.941	527.47	210.767
2	564	1273	0	48.0539	380.61	6.59718	133.054
2	565	1196	1	84.5844	357.801	286.07	134.748
2	566	1191	1	70.4147	354.922	277.106	136.901
2	567	1314	0	53.4523	381.399	8.52462	143.407
2	568	1242	0	80.9465	382.468	7.43308	140.227
2	569	980	0	44.5927	319.169	144.372	105.603
2	570	1560	1	64.5095	491.126	311.255	182.076
2	571	1416	1	95.7196	627.345	561.775	177.791
2	572	1533	0	129.87	419.074	8.32364	182.835
2	573	1305	1	58.8953	381.569	303.813	147.736
2	574	1231	0	104.122	391.239	6.84105	126.837
2	575	1226	0	45.8762	327.603	6.52117	138.349
2	576	2528	0	174.638	778.245	21.9538	279.855
2	577	1128	0	57.742	374.228	49.8914	122.274
2	578	1143	0	75.317	345.686	6.71803	129.036
2	579	1550	1	119.891	649.815	583.796	193.102
2	580	1210	1	135.085	387.941	303.72	143.333
2	581	1072	0	36.8764	357.193	5.51368	110.405
2	582	1161	0	43.2048	368.791	6.20147	116.15
2	583	1419	0	71.5915	379.248	7.82127	157.967
2	584	1332	1	82.0149	354.162	287.959	155.161
2	585	1406	0	88.1643	386.276	7.55988	164.018
2	586	1514	1	85.2962	573.769	551.519	178.778
2	587	1485	1	96.0687	445.616	307.923	165.197
2	588	1744	1	116.182	687.105	629.343	203.748
2	589	1309	1	60.2379	365.746	278.593	145.331
2	590	1531	0	106.087	724.152	9.26133	165.304
2	591	1317	1	55.7285	363.224	275.356	145.469
2	592	1361	0	92.194	360.34	9.80826	155.173
2	593	1637	1	65.2364	532.705	429.87	198.626
2	594	1466	1	118.858	841.174	506.272	171.936
2	595	1475	0	60.0622	432.483	79.1366	149.954
2	596	1615	1	126.13	564.265	572.785	233.053
2	597	1672	1	64.0505	585.498	552.132	211.978
2	598	2771	0	277.924	805.861	15.144	296.867
2	599	1097	0	47.9958	322.763	5.69891	107.003
2	600	1370	1	118.269	759.659	639.276	1267.17
2	601	1917	1	65.0837	660.662	407.39	216.792
2	602	1544	0	75.753	401.127	33.5063	176.468
2	603	1785	1	92.6635	607.357	594.345	233.503
2	604	1983	1	69.7476	625.314	564.113	235.631
2	605	1716	0	99.5708	509.333	14.3518	171.745
2	606	1019	0	135.191	369.923	5.79153	104.843
2	607	2219	1	124.529	695.93	637.608	283.343
2	608	1151	0	44.7603	416.965	6.47791	117.09
2	609	1125	1	48.5332	317.601	292.143	115.201
2	610	1930	1	129.773	579.634	361.445	227.782
2	611	2378	1	356.376	793.014	665.376	2147.05
2	612	1197	0	83.1621	322.954	7.37105	115.553
2	613	1049	0	36.2422	363.863	5.60023	99.9737
2	614	1562	1	71.7717	583.124	349.53	195.99
2	615	1737	1	68.6097	565.578	328.24	193.311
2	616	1707	1	49.1015	429.655	137.117	193.093
2	617	1665	1	73.4428	525.347	292.456	202.439
2	618	1154	0	50.2971	376.504	6.16295	108
2	619	3178	0	486.18	1324.2	472.098	342.853
2	620	1103	1	74.836	346.274	279.689	109.337
2	621	1809	1	78.0301	708.146	563.157	196.054
2	622	1217	0	43.0626	385.976	7.17998	120.012
2	623	1310	1	61.9668	357.283	159.886	144.093
2	624	1176	0	70.636	381.23	6.98392	122.892
2	625	1783	1	59.4198	617.207	440.674	198.554
2	626	1960	1	74.5553	689.189	561.123	225.163
2	627	2421	0	204.436	750.588	15.4457	263.879
2	628	1640	1	64.4998	618.161	574.023	186.51
2	629	1186	1	62.3767	365.057	278.213	117.915
2	630	1308	0	61.8564	375.755	7.44097	139.785
2	631	1855	1	105.19	710.033	594.617	206.298
2	632	1203	0	48.5138	377.12	7.17839	121.611
2	633	1568	1	136.764	637.807	531.04	174.91
2	634	1242	0	58.8291	375.823	7.21505	128.123
2	635	1012	0	48.824	331.839	137.81	96.8329
2	636	1125	1	47.7468	311.923	293.307	120.068
2	637	2882	1	203.038	1309.85	587.874	298.295
2	638	1229	0	47.2456	471.867	7.2773	111.928
2	639	1147	0	37.1803	367.15	6.11998	116.839
2	640	1156	1	53.9421	335.251	298.314	112.212
2	641	2327	1	324.542	728.299	604.355	325.24
2	642	3528	1	253.353	1378.71	1156.76	350.384
2	643	1137	1	52.3337	341.338	140.236	107.098
2	644	1122	0	47.8477	367.43	7.14168	109.864
2	645	1043	1	59.9272	352.319	298.327	102.57
2	646	1832	1	93.2368	662.684	545.159	182.785
2	647	1329	1	48.0278	462.101	147.631	130.503
2	648	2110	1	104.458	682.012	629.668	246.903
2	649	1678	1	63.8751	607.489	482.49	187.627
2	650	1399	0	63.9099	417.212	84.7239	149.96
2	651	1688	1	130.497	704.046	601.685	197.132
2	652	2712	1	143.26	741.42	323.204	286.072
2	653	1153	1	54.6643	353.572	169.453	124.34
2	654	1200	0	95.3084	318.086	9.4566	132.324
2	655	1046	1	60.4283	336.271	131.847	95.2722
2	656	1448	1	122.817	458.085	230.806	145.152
2	657	2195	0	115.98	731.598	14.1623	196.64
2	658	1167	0	36.882	368.211	7.30497	103.805
2	659	1126	0	41.1924	358.588	6.09474	109.366
2	660	2425	1	109.283	749.256	642.854	263.228
2	661	1488	0	91.2758	390.74	8.7664	141.348
2	662	1184	0	75.2587	349.531	137.347	108.661
2	663	1261	0	38.1901	342.294	6.52712	126.493
2	664	1313	0	58.9858	332.672	7.53649	136.088
2	665	1703	1	69.8959	678.188	548.876	171.251
2	666	1211	0	82.6615	396.59	8.19962	124.401
2	667	1167	0	85.9901	367.63	7.59042	121.59
2	668	2083	1	175.631	702.194	601.459	203.208
2	669	1953	1	75.9723	653.445	571.08	211.969
2	670	1976	0	95.951	728.066	20.8609	197.699
2	671	2304	1	126.52	726.756	544.771	259.785
2	672	1186	0	46.4723	367.904	22.7626	106.374
2	673	2412	0	94.5975	691.391	109.153	247.195
2	674	1145	0	144.908	359.023	6.66296	106.299
2	675	1004	0	36.1946	322.199	22.665	86.5821
2	676	1302	0	51.9787	443.291	48.356	123.155
2	677	1901	1	94.3959	663.981	585.431	200.264
2	678	2374	0	84.05	755.142	13.2204	234.356
2	679	1187	0	94.3757	339.093	6.66865	116.109
2	680	3014	1	129.455	1132	620.59	340.157
3	1	984	0	52.0614	249.869	243.607	142.312
3	2	1048	0	37.7802	299.163	5.49058	136.51
3	3	1201	0	34.5346	310.143	5.4784	167.168
3	4	1273	0	49.9428	307.825	112.584	178.885
3	5	1417	1	59.0689	461.442	662.516	279.602
3	6	1384	0	126.747	324.89	48.3915	190.47
3	7	1246	0	49.6204	301.402	7.23125	173.034
3	8	1589	1	53.8704	502.584	501.225	244.342
3	9	1117	0	27.8144	307.82	5.12569	151.158
3	10	1260	0	81.1511	312.486	5.72195	170.098
3	11	1626	1	56.8958	494.575	808.367	265.333
3	12	1421	1	56.894	517.261	688.937	222.844
3	13	1069	0	28.4437	304.983	5.20856	150.437
3	14	2526	0	283.492	680.902	12.4494	347.661
3	15	1037	1	42.3189	244.365	245.588	152.778
3	16	1269	0	67.2562	328.571	6.00932	174.997
3	17	1136	1	33.0987	274.861	326.97	162.066
3	18	1133	0	34.7545	285.103	5.29499	155.505
3	19	1639	1	74.4149	553.571	764.722	260.617
3	20	991	1	40.8693	269.395	305.464	141.155
3	21	1204	0	55.0523	353.428	171.717	174.197
3	22	1632	1	192.28	549.105	215.12	238.228
3	23	990	1	70.0657	250.154	238.853	145.876
3	24	1440	0	73.7019	338.253	6.5473	197.443
3	25	1093	0	36.738	272.793	44.5713	151.274
3	26	1007	0	46.1977	311.583	5.38344	128.976
3	27	1501	1	61.8678	538.107	699.985	220.596
3	28	1313	0	28.0131	291.966	5.89154	177.953
3	29	1428	0	33.8383	336.932	6.76341	199.698
3	30	1057	1	68.2126	263.389	244.186	154.24
3	31	1416	1	99.6799	540.054	651.129	1358.03
3	32	1513	1	110.459	540.748	718.689	238.444
3	33	1466	1	76.6161	516.938	544.584	227.873
3	34	1768	0	113.67	738.504	393.095	249.155
3	35	970	1	37.7994	261.986	253.64	141.565
3	36	1578	1	113.67	524.956	471.121	239.082
3	37	1609	1	74.3625	573.986	622.957	280.272
3	38	1164	0	84.376	341.19	6.8119	150.754
3	39	1423	0	45.2401	356.262	7.05258	198.526
3	40	2681	1	115.687	891.086	871.809	400.739
3	41	1452	0	90.6455	356.986	7.06824	194.844
3	42	1133	0	71.4229	303.62	5.70407	158.389
3	43	1137	0	42.7046	337.74	5.62466	156.475
3	44	1701	1	77.5343	561.662	528.383	264.267
3	45	982	1	37.6053	259.317	252.919	141.894
3	46	1292	0	35.6931	351.056	6.15038	178.684
3	47	1505	1	68.3846	547.492	861.135	246.507
3	48	1531	0	57.9319	609.07	8.17971	211.677
3	49	1458	0	60	325.357	6.82129	184.397
3	50	1044	0	35.7854	293.005	46.7526	145.732
3	51	1561	0	62.3188	620.684	8.33733	215.813
3	52	1660	1	118.019	438.332	257.49	227.943
3	53	1018	1	38.9865	253.914	239.495	146.269
3	54	1196	0	48.4613	351.994	5.81257	152.244
3	55	1513	1	59.9256	576.233	766.322	226.089
3	56	1606	1	69.7536	557.154	619.935	253.538
3	57	1151	0	61.5885	355.363	5.78692	159.487
3	58	2004	0	85.8428	665.121	10.0663	256.174
3	59	1222	0	66.6642	389.377	6.29306	170.727
3	60	1020	0	54.8757	311.383	5.16226	137.851
3	61	984	0	39.6472	330.67	5.1781	129.515
3	62	1988	1	65.5599	632.268	661.989	284.538
3	63	1146	0	62.7008	323.464	5.4902	141.902
3	64	1910	1	68.5659	622.219	644.438	272.964
3	65	1440	1	65.0145	521.671	593.79	224.299
3	66	1543	0	142.483	406.026	7.7387	198.89
3	67	1876	1	88.7472	557.277	627.759	296.772
3	68	1290	0	73.652	338.94	6.33684	161.723
3	69	1880	0	158.795	637.393	9.26406	256.533
3	70	1244	0	94.4954	316.832	5.98373	154.494
3	71	1376	0	51.944	375.079	6.94688	184.887
3	72	1304	0	38.9687	305.709	6.80398	175.629
3	73	1050	0	32.1022	338.228	5.19394	140.807
3	74	1182	0	87.6491	361.546	6.08804	155.613
3	75	963	1	37.8155	253.833	290.801	135.76
3	76	1326	1	90.2384	498.035	624.799	200.642
3	77	1115	1	75.3291	293.289	358.929	149.583
3	78	1378	1	58.7646	464.849	370.487	198.077
3	79	1832	0	73.1866	674.557	10.4901	240.042
3	80	1043	1	46.1644	259.446	270.509	145.775
3	81	1088	1	107.737	508.348	534.534	163.603
3	82	1006	0	58.0318	338.537	5.08115	130.127
3	83	1159	1	59.9862	291.673	346.018	153.099
3	84	1097	0	45.2333	343.224	5.79158	142.475
3	85	1653	1	85.8848	602.003	638.784	227.443
3	86	1036	1	46.4157	243.056	304.189	139.653
3	87	2048	0	137.401	682.166	10.775	267.245
3	88	2529	0	111.079	732.703	14.3493	312.298
3	89	1128	0	68.8514	349.814	5.81605	144.786
3	90	1026	0	61.4954	296.165	4.92016	124.227
3	91	1056	0	37.202	352.868	6.62367	134.972
3	92	1052	0	43.8172	347.256	5.50071	141.506
3	93	971	0	56.9462	288.127	4.67033	117.994
3	94	974	0	56.2121	347.448	5.79408	124.039
3	95	1042	0	39.5156	334.23	5.39571	139.248
3	96	1945	0	90.8711	736.197	10.2677	252.675
3	97	2483	0	142.114	739.818	13.365	305.05
3	98	1790	1	198.116	535.9	599.201	277.927
3	99	2211	0	143.97	580.804	10.8465	263.106
3	100	968	0	39.2978	301.69	4.74553	122.245
3	101	1273	0	35.1976	306.301	6.26535	161.837
3	102	1399	1	62.0804	512.102	735.245	192.374
3	103	2211	0	155.502	665.15	11.1003	283.928
3	104	1981	1	85.7484	602.598	642.716	255.619
3	105	1537	1	83.3845	539.552	853.634	233.208
3	106	1517	1	85.0406	559.073	854.218	209.845
3	107	1689	1	584.345	609.035	904.321	1394.45
3	108	1174	1	53.3378	405.083	312.249	156.58
3	109	1086	1	52.7587	281.027	405.216	138.216
3	110	1183	0	46.0493	317.92	5.9089	147.7
3	111	1561	1	108.363	556.507	892.948	247.569
3	112	1914	1	81.0895	553.355	479.55	245.611
3	113	991	0	39.3568	324.777	6.24433	119.328
3	114	1379	1	112.246	453.078	365.83	172.562
3	115	1904	1	103.285	593.839	556.685	258.448
3	116	1716	1	62.2929	503.433	446.534	207.186
3	117	2124	0	76.3997	668.596	11.0074	270.088
3	118	1758	1	81.4968	579.853	563.837	233.723
3	119	1404	0	37.1053	355.72	7.24298	164.556
3	120	2410	1	88.8514	971.187	1400.11	323.113
3	121	1239	0	40.9229	326.364	6.19867	157.766
3	122	1159	0	46.4838	342.102	7.5474	135.226
3	123	971	0	38.4195	275.466	5.91368	119.013
3	124	1372	0	35.0643	310.565	6.72686	167.939
3	125	1050	0	32.1066	325.121	5.39762	126.435
3	126	1519	1	70.9939	496.145	625.486	199.288
3	127	1074	0	37.6263	322.165	37.8763	130.783
3	128	1848	0	66.9807	490.658	10.2919	227.554
3	129	1947	1	70.8026	647.253	547.826	240.065
3	130	1559	1	78.3406	479.774	546.903	200.127
3	131	986	0	45.455	305.709	5.4705	121.256
3	132	2049	1	169.699	731.081	681.388	1894.63
3	133	972	1	42.8402	237.599	274.513	123.515
3	134	1488	1	72.5474	500.191	602.434	212.735
3	135	2094	0	111.98	696.325	12.3438	240.903
3	136	1203	0	41.6833	349.516	5.98988	128.887
3	137	1334	0	107.8	349.705	7.68972	151.243
3	138	2029	1	125.356	603.435	860.329	245.688
3	139	1005	0	37.9837	255.151	41.0236	113.31
3	140	1511	1	69.0251	486.375	553.407	198.13
3	141	972	0	30.5935	288.826	5.20418	111.366
3	142	1493	1	67.3807	460.795	522.747	179.749
3	143	1126	1	44.5976	275.076	406.729	133.195
3	144	3199	0	204.708	1243.2	16.4287	334.699
3	145	1686	1	78.6265	468.784	685.687	198.485
3	146	1352	0	60.0874	338.941	6.9147	161.144
3	147	1350	0	63.7423	329.277	7.03871	158.457
3	148	1184	0	44.0495	328.804	6.6538	129.024
3	149	1224	0	39.8413	325.611	6.44045	143.868
3	150	2838	2	149.648	985.48	1263.58	359.595
3	151	971	2	33.0349	231.833	253.073	116.838
3	152	2417	0	141.467	713.167	17.5345	254.132
3	153	3110	0	192.973	973.409	17.7203	366.407
3	154	1579	0	48.2831	521.531	8.86192	188.781
3	155	1286	1	73.1791	453.74	519.816	158.908
3	156	1144	0	49.2854	270.097	6.78267	126.071
3	157	986	1	35.411	249.559	383.937	111.519
3	158	1073	0	36.1562	270.373	5.6804	127.964
3	159	1319	0	86.0218	334.322	7.21993	152.198
3	160	1081	0	42.4882	324.451	5.80418	121.652
3	161	1112	1	43.8977	280.015	433.424	130.17
3	162	1486	1	61.0609	503.595	599.104	186.522
3	163	1237	0	69.3993	302.795	6.81308	147.829
3	164	1107	0	37.2055	316.264	5.98755	114.951
3	165	2202	1	68.2393	527.141	569.98	240.033
3	166	1673	1	120.283	515.14	885.35	236.444
3	167	1237	0	46.7342	330.958	6.63975	131.354
3	168	1843	1	103.829	611.178	1046.18	271.979
3	169	1751	1	81.4781	549.609	533.142	223.327
3	170	1706	0	104.736	572.483	310.209	199.82
3	171	1115	0	84.258	327.233	5.88808	130.98
3	172	981	0	41.6478	340.607	6.02725	109.871
3	173	1009	0	35.1985	302.854	25.8118	117.892
3	174	1609	1	63.845	515.796	624.282	202.671
3	175	3198	2	131.333	1044.18	1256.78	388.423
3	176	1149	0	43.0373	358.45	6.47675	131.87
3	177	1367	0	99.347	328.612	6.90687	161.124
3	178	2246	0	166.456	707.851	13.4885	256.354
3	179	2182	1	111.481	760.378	967.627	263.107
3	180	1101	0	68.7416	362.388	6.72801	126.552
3	181	2068	0	166.669	704.615	11.7424	246.668
3	182	1467	0	67.9671	451.576	8.69567	160.174
3	183	1034	0	36.9299	301.363	5.31772	120.14
3	184	1354	0	40.6092	334.692	7.37072	141.384
3	185	1004	1	40.5589	256.566	294.864	118.655
3	186	1245	0	63.4279	379.337	7.25693	142.514
3	187	1028	0	36.7745	309.548	5.2495	119.357
3	188	2002	0	128.841	635.908	11.6625	207.86
3	189	1515	1	78.8321	482.014	571.65	212.041
3	190	1546	1	79.1713	580.858	558.864	191.275
3	191	1276	0	125.237	331.197	8.71737	142.312
3	192	2338	1	121.092	852.524	720.224	316.902
3	193	1066	0	35.0797	343.82	50.5505	121.61
3	194	1434	1	66.7505	417.473	250.606	163.689
3	195	2200	0	99.4372	703.119	12.212	223.849
3	196	1731	1	94.6607	521.594	811.32	195.441
3	197	1203	0	39.8242	334.644	6.77404	121.837
3	198	1057	1	36.8368	299.298	135.514	109.243
3	199	1054	0	35.6166	327.177	8.24746	117.851
3	200	1679	1	150.309	528.946	500.612	210.388
3	201	1051	0	74.0615	302.232	6.23873	116.056
3	202	1041	1	33.3977	253.904	273.934	122.161
3	203	1073	0	40.1282	368.497	6.38286	121.716
3	204	1319	0	79.889	357.495	43.1976	151.204
3	205	1334	1	52.0822	485.945	552.453	163.246
3	206	1873	1	84.7798	503.669	831.79	203.122
3	207	1550	1	124.09	528.888	563.246	202.362
3	208	1089	0	50.2299	364.704	6.64372	121.77
3	209	1129	1	39.6165	263.104	272.225	128.976
3	210	1250	0	88.8384	360.663	43.2423	143.045
3	211	1363	0	76.025	346.239	7.95866	155.18
3	212	1273	0	83.2728	345.637	7.00102	144.654
3	213	1081	0	95.2647	363.63	6.81363	126.783
3	214	1502	0	39.3384	363.386	8.10732	149.706
3	215	991	0	41.3464	337.691	27.6626	113.61
3	216	1210	0	113.163	321.904	10.0541	133.766
3	217	2178	1	62.348	500.289	530.886	225.661
3	218	1469	1	71.1208	487.412	721.868	175.689
3	219	1358	1	44.4855	406.743	196.829	152.921
3	220	1355	1	53.1323	484.728	845.35	151.464
3	221	1600	1	56.0186	524.434	638.675	220.328
3	222	1419	1	109.255	487.964	322.492	165.467
3	223	1997	0	71.9253	643.692	12.8946	216.228
3	224	991	0	47.9001	326.837	6.18935	98.2319
3	225	1607	1	99.4815	560.829	1043.47	230.529
3	226	1014	0	81.8407	326.49	7.14025	109.646
3	227	1047	0	94.8626	338.549	5.80475	116.942
3	228	1620	1	83.3585	571.619	1065.7	235.592
3	229	1317	0	61.0771	355.122	7.48148	146.414
3	230	1596	0	41.2968	358.458	8.8771	155.415
3	231	1001	0	40.0735	338.628	7.28569	102.097
3	232	1760	1	81.2729	546.168	643.988	205.999
3	233	965	0	25.289	229.143	4.98747	102.865
3	234	1095	0	60.1104	376.93	6.77069	128.254
3	235	1128	0	80.9944	345.001	6.36921	126.035
3	236	1227	0	51.728	393.908	7.52584	143.927
3	237	1780	1	99.101	585.146	1015.07	224.846
3	238	2053	1	97.3031	660.416	1183.26	248.131
3	239	1087	0	40.1911	387.148	7.26064	120.896
3	240	1756	1	75.1745	537.669	842.804	188.006
3	241	1151	0	92.9266	332.323	8.24396	124.054
3	242	1496	1	59.5895	500.54	619.02	179.132
3	243	1550	1	181.409	569.293	702.931	213.629
3	244	964	0	36.2601	329.742	5.37697	105.571
3	245	1728	0	131.925	636.397	9.67919	189.708
3	246	1383	0	55.4776	497.184	8.14609	134.064
3	247	1159	0	50.531	336.643	7.8287	126.223
3	248	1213	0	47.5651	335.343	6.76977	128.128
3	249	3709	1	205.827	1535.02	1544.14	419.354
3	250	1207	0	110.977	366.665	9.31646	130.621
3	251	1065	0	45.5537	336.723	7.51733	114.809
3	252	1672	1	186.547	587.022	698.252	226.501
3	253	1269	0	34.2962	330.746	7.10666	137.812
3	254	1656	1	64.4018	535.797	713.492	171.992
3	255	1549	0	59.8224	587.782	9.38907	148.769
3	256	1117	0	53.099	313.763	6.05834	119.88
3	257	2777	1	164.243	1220.27	1352.36	483.423
3	258	1285	0	32.9546	316.826	6.79014	136.653
3	259	1592	1	74.578	527.67	235.8	179.249
3	260	1409	0	95.3284	476.56	149.41	159.828
3	261	2023	0	102.112	763.563	12.7138	229.782
3	262	2302	0	57.4984	626.895	11.8783	245.346
3	263	1089	0	58.9656	299.241	7.28595	113.414
3	264	1662	1	64.5246	576.892	559.134	201.475
3	265	2287	2	84.554	904.563	1076.38	273.668
3	266	1289	0	31.0244	302.939	6.27443	145.574
3	267	2398	2	100.958	817.37	388.553	293.397
3	268	1286	0	132.185	339.304	6.91678	142.301
3	269	1180	0	52.2851	301.546	6.74168	139.108
3	270	1088	0	40.9399	322.599	33.9558	129.222
3	271	1363	0	78.2645	349.918	7.57835	150.505
3	272	1178	1	49.9103	253.536	304.197	143.242
3	273	966	1	42.8869	206.551	252.582	116.189
3	274	1309	0	55.1201	327.804	9.33726	159.997
3	275	1317	0	56.387	328.405	9.84909	160.105
3	276	1077	0	33.1838	313.555	5.5319	130.692
3	277	994	0	43.6274	295.052	5.47439	122.186
3	278	1341	0	42.1763	290.74	5.94949	166.056
3	279	1031	0	41.3212	318.525	5.51656	127.945
3	280	1138	0	26.9691	285.824	5.19051	142.84
3	281	1136	0	36.1937	321.384	6.14855	141.631
3	282	3136	0	218.885	953.23	15.5635	400.247
3	283	4198	0	206.381	1359.9	19.9365	529.183
3	284	1018	0	32.2999	317.807	4.80548	128.411
3	285	2499	0	163.317	662.311	13.2401	318.256
3	286	1591	1	80.5456	539.77	213.067	211.99
3	287	1040	1	34.3151	276.313	208.181	136.226
3	288	1465	0	79.0062	441.835	7.51403	183.96
3	289	1056	0	39.2652	312.299	4.97867	133.206
3	290	1088	0	162.335	303.052	109.695	143.345
3	291	1480	1	108.923	410.906	561.686	202.485
3	292	1719	1	68.6516	504.061	389.496	225.776
3	293	1258	0	30.1491	298.015	8.89722	155.727
3	294	1073	0	41.0188	293.814	5.38935	135.652
3	295	2590	0	186.909	733.401	12.5507	326.243
3	296	989	1	46.1025	251.118	280.239	131.397
3	297	1436	0	58.688	348.329	7.53693	181.382
3	298	1631	0	60.9985	376.747	8.04598	208.399
3	299	2066	1	329.782	575.202	211.268	273.289
3	300	1783	1	126.409	534.551	684.305	263.25
3	301	1503	1	65.1988	436.996	434.061	196.211
3	302	1678	1	65.3416	534.106	447.387	243.172
3	303	1772	1	66.0035	571.289	452.816	283.629
3	304	1173	1	39.8036	290.264	185.619	150.373
3	305	2489	0	101.861	713.623	13.4086	308.12
3	306	1209	0	89.1467	276.832	6.12929	149.917
3	307	1235	0	30.0228	321.956	5.57911	155.224
3	308	1126	0	38.4773	303.82	94.1844	141.505
3	309	2508	0	216.159	681.395	12.6255	313.746
3	310	1995	1	71.7667	943.309	857.875	278.344
3	311	1350	0	33.1653	325.564	6.49187	169.592
3	312	1241	1	109.988	391.642	264.55	165.831
3	313	1433	1	53.5869	512.138	449.85	195.439
3	314	1040	1	43.4995	285.964	176.603	135.08
3	315	1052	1	53.1845	273.268	299.001	138.572
3	316	1041	0	48.1151	316.799	5.34781	130.476
3	317	1886	1	174.297	647.602	367.261	272.154
3	318	1697	1	61.6031	532.068	434.078	224.416
3	319	1649	1	88.6185	497.676	592.948	214.563
3	320	1718	1	70.1712	539.034	574.788	233.322
3	321	1522	0	133.905	530.105	7.76085	186.347
3	322	1983	1	72.239	540.041	588.539	259.639
3	323	1454	1	119.562	436.192	376.156	192.316
3	324	2603	0	183.086	732.185	14.5607	314.173
3	325	1510	1	71.05	490.109	617.665	228.256
3	326	2399	0	213.14	718.579	15.0781	292.836
3	327	1606	1	72.3313	592.275	473.284	220.533
3	328	1175	0	28.4546	303.466	6.64038	143.484
3	329	1301	0	151.875	380.631	6.91989	161.805
3	330	1553	1	67.9314	561.106	422.147	200.185
3	331	1489	1	132.549	434.875	350.755	195.85
3	332	1460	1	96.5787	487.366	564.154	210.706
3	333	1603	1	107.625	536.135	557.44	219.525
3	334	1109	0	81.4303	334.562	5.65248	137.094
3	335	990	1	32.7209	245.564	364.224	127.628
3	336	1674	1	68.9899	554.402	487.902	259.903
3	337	1752	1	125.913	596.613	673.035	279.043
3	338	1425	0	72.2142	484.706	113.779	176.411
3	339	1480	1	62.9433	520.675	526.042	194.302
3	340	1004	1	44.4875	253.171	373.296	128.225
3	341	2491	0	156.559	692.486	12.2867	308.569
3	342	1796	1	92.5599	481.2	701.94	237.351
3	343	2400	0	118.014	655.722	11.9228	281.262
3	344	1658	1	126.585	536.529	499.929	209.564
3	345	1144	1	43.4398	308.891	229.283	143.141
3	346	1655	0	42.0007	350.704	7.96393	203.716
3	347	1135	1	41.447	280.805	262.649	141.928
3	348	3736	1	125.298	1165.7	1110.22	485.527
3	349	1126	1	52.1063	263.68	290.863	137.624
3	350	1039	1	54.6436	260.434	192.423	129.977
3	351	1131	0	39.5918	363.909	6.91023	136.837
3	352	2392	0	102.759	684.943	288.148	302.671
3	353	1575	0	93.8943	488.847	115.954	192.786
3	354	1160	1	48.2433	281.074	259.684	143.184
3	355	1441	1	57.1908	437.417	191.273	175.558
3	356	1063	0	33.927	336.732	5.52505	125.667
3	357	1153	0	66.1604	359.674	6.05164	142.684
3	358	2726	0	67.9543	706.975	12.7636	326.182
3	359	1030	0	40.2008	325.934	5.23818	127.081
3	360	2239	0	135.074	724.752	12.8044	272.79
3	361	1141	0	37.5026	322.033	18.2376	138.237
3	362	1886	1	67.7351	535.414	801.761	255.723
3	363	1741	1	78.0174	623.915	252.795	211.104
3	364	1086	0	46.5745	340.092	5.96219	133.633
3	365	1065	0	49.6401	323.829	5.69545	126.464
3	366	1221	1	56.7611	291.229	261.746	148.448
3	367	1363	0	53.0444	332.98	6.98795	165.109
3	368	1255	0	83.2102	356.671	6.27843	152.752
3	369	1245	1	66.1494	298.551	344.447	160.737
3	370	2276	1	135.115	621.013	379.539	285.076
3	371	1204	0	52.4974	316.202	6.88385	144.254
3	372	1918	1	338.975	595.657	523.371	284.819
3	373	1084	1	46.6733	284.93	358.327	141.203
3	374	1390	0	91.2158	410.445	7.80175	171.857
3	375	1207	0	50.2968	365.778	6.22754	138.552
3	376	1614	0	42.6357	371.402	7.82997	193.018
3	377	1166	1	48.5028	282.606	274.166	139.968
3	378	1717	1	79.48	558.179	513.544	219.414
3	379	1060	1	51.92	281.967	314.07	130.164
3	380	1445	0	68.4439	381.245	8.41418	173.767
3	381	1199	0	54.3243	335.042	6.58471	136.959
3	382	1089	0	31.799	294.691	6.23401	129.21
3	383	1595	1	54.1145	582.05	459.066	224.172
3	384	1376	1	48.6465	406.514	334.633	172.714
3	385	1379	1	58.6139	448.091	356.465	163.124
3	386	1155	0	44.0634	356.176	6.84627	140.416
3	387	1638	1	196.873	568.03	488.252	218.548
3	388	1145	1	54.0525	288.542	270.15	136.512
3	389	1170	1	51.9803	349.884	244.665	144.797
3	390	2691	1	178.031	901.233	741.65	344.432
3	391	986	0	35.0172	320.726	5.11316	113.723
3	392	1403	0	34.927	351.22	6.56547	163.818
3	393	1542	1	50.0351	531.589	502.248	198.592
3	394	1099	1	50.9055	280.402	284.179	131.441
3	395	3350	1	250.1	1539.49	1271.5	2337.03
3	396	1631	1	79.1043	534.59	595.916	214.929
3	397	1489	1	54.4532	520.314	590.205	182.492
3	398	1276	0	103.664	382.361	6.69401	155.865
3	399	2420	0	154.046	689.806	13.1787	288.064
3	400	1188	0	97.8441	373.9	6.48823	145.125
3	401	1723	1	89.4896	541.579	719.285	241.312
3	402	1404	0	60.3826	385.229	8.56176	163.668
3	403	1763	1	115.831	552.796	700.737	271.587
3	404	1689	1	127.295	563.318	582.405	226.418
3	405	1658	1	131.319	561.043	597.25	224.856
3	406	1293	1	58.6896	471.672	279.818	152.714
3	407	1643	1	48.9384	590.658	432.252	201.315
3	408	1306	0	289.593	383.059	22.979	161.029
3	409	1103	1	47.6466	274.271	291.797	129.251
3	410	1005	0	34.1513	336.158	33.4555	121.01
3	411	1741	1	68.7082	584.062	482.425	240.291
3	412	1077	1	33.9598	318.972	106.699	121.06
3	413	1161	0	37.3469	357.166	33.7909	140.088
3	414	1833	1	86.2422	563.734	579.128	224.081
3	415	1187	0	44.8701	353.022	6.85771	131.672
3	416	1354	0	93.7132	401.735	96.6142	166.093
3	417	1745	1	73.7925	511.29	782.523	221.492
3	418	2197	0	73.9022	673.833	12.1419	261.389
3	419	1540	1	53.3715	584.504	455.516	184.152
3	420	2445	2	106.232	919.596	602.866	287.04
3	421	1764	1	63.3578	555.389	564.345	220.069
3	422	1481	1	71.9527	525.658	620.739	179.228
3	423	1113	1	46.4833	294.708	311.074	136.178
3	424	1047	1	44.4768	280.029	297.144	128.384
3	425	997	1	34.632	318.673	234.65	118.687
3	426	1293	0	66.5594	405.335	91.9913	155.793
3	427	1507	1	63.7823	521.455	608.436	179.815
3	428	1000	1	43.3443	295.044	192.551	121.186
3	429	1706	1	62.9816	624.544	500.154	224.539
3	430	1522	1	60.5433	596.605	490.689	192.405
3	431	1115	0	47.9872	333.514	7.01865	129.125
3	432	996	1	39.1551	276.684	288.258	114.583
3	433	966	0	67.0626	327.27	6.10581	105.703
3	434	1472	0	50.3124	402.158	40.0758	172.359
3	435	1526	1	103.339	470.907	513.801	195.513
3	436	1012	1	59.2913	286.544	181.92	122.72
3	437	1690	1	88.8547	527.502	646.732	204.937
3	438	1755	0	51.5707	401.786	9.5546	208.532
3	439	1563	1	69.8564	614.202	523.868	187.629
3	440	1502	1	62.6781	489.264	633.576	178.067
3	441	1736	1	116.487	438.252	488.358	218.058
3	442	1567	1	75.9393	518.521	599.749	201.226
3	443	1552	1	89.23	435.447	191.595	171.237
3	444	1163	1	66.0379	492.414	545.283	144.46
3	445	1800	1	103.469	536.794	716.734	270.972
3	446	982	2	54.21	292.12	344.485	114.981
3	447	2044	1	92.8758	595.656	687.826	256.054
3	448	1415	0	38.4444	322.495	8.22969	164.691
3	449	1335	1	58.8493	383.553	205.76	163.673
3	450	1766	1	175.738	540.135	668.06	255.981
3	451	984	1	37.1738	256.214	332.402	119.561
3	452	1648	1	79.1327	529.899	682.102	211.312
3	453	1027	2	62.0622	297.285	338.87	129.257
3	454	1096	0	48.4842	317.584	7.74755	130.798
3	455	3109	1	167.831	1215.75	453.453	356.374
3	456	1005	1	54.8493	284.732	223.197	121.947
3	457	2104	1	113.492	870.403	716.405	259.684
3	458	1124	1	75.0814	250.243	289.688	139.896
3	459	1569	1	54.5128	540.063	684.31	203.063
3	460	1892	1	194.503	564.25	671.909	261.125
3	461	1768	1	87.2718	528.988	572.086	214.242
3	462	1071	0	42.1548	350.605	6.18045	125.333
3	463	1106	0	47.5023	332.934	6.66484	122.792
3	464	1829	1	79.4144	570.272	800.067	270.21
3	465	1289	0	122.228	371.28	9.55428	154.789
3	466	1183	0	60.4544	380.367	77.5852	135.163
3	467	2286	0	124.868	721.378	14.5123	247.679
3	468	1036	1	40.916	274.869	354.973	125.672
3	469	974	0	61.2781	320.906	5.67765	104.676
3	470	1600	1	69.1871	541.795	637.013	203.381
3	471	4029	2	270.768	1446.25	1659.44	531.361
3	472	998	0	66.1868	308.737	5.51373	109.877
3	473	1226	0	49.2937	354.967	6.11522	138.995
3	474	1195	0	42.879	357.581	8.35033	139.389
3	475	1180	0	170.718	365.713	7.31603	140.623
3	476	1524	0	76.702	380.796	27.8604	185.633
3	477	1265	0	39.0378	331.643	7.63618	142.096
3	478	1491	0	187.912	428.676	23.3776	177.103
3	479	1244	0	36.1919	342.657	6.56684	143.882
3	480	1369	0	47.3087	414.964	16.183	144.038
3	481	1145	0	42.487	347.439	7.61427	133.148
3	482	1567	1	78.4702	506.459	682.921	203.411
3	483	1188	0	55.9727	355.07	6.86642	137.785
3	484	1059	1	50.2331	292.045	231.802	131.681
3	485	1143	0	85.8272	342.707	5.6663	119.209
3	486	1022	0	77.0224	278.83	7.60232	121.765
3	487	1019	0	56.2576	303.419	5.56938	118.801
3	488	2213	1	143.887	985.903	636.981	268.625
3	489	1571	0	131.945	379.146	21.7248	194.627
3	490	2097	0	120.317	711.762	22.3147	242.599
3	491	1970	1	160.487	587.686	263.582	243.776
3	492	1103	0	35.7757	354.91	6.65827	119.04
3	493	1272	0	149.683	352.643	7.86154	151.717
3	494	1259	1	98.6102	564.795	463.482	156.454
3	495	1213	0	40.2914	370.204	40.0546	136.274
3	496	1383	0	77.4519	366.788	7.09577	142.155
3	497	1197	0	82.2812	315.271	6.65719	141.045
3	498	1038	0	39.9269	326.727	6.23339	119.693
3	499	2029	1	139.835	624.759	522.357	237.677
3	500	1800	0	195.79	473.729	10.3868	185.327
3	501	2144	1	115.531	773.737	851.363	243.127
3	502	1079	0	64.4449	325.593	6.65892	112.385
3	503	1317	1	63.4392	426.158	198.36	140.058
3	504	1281	0	54.1854	365.036	7.34313	154.137
3	505	1332	0	141.364	436.106	11.7795	147.765
3	506	1347	0	118.488	359.56	10.2633	155.331
3	507	2468	1	169.057	808.167	793.144	283.714
3	508	1068	1	58.2985	279.273	176.341	125.739
3	509	1339	1	61.7207	543.479	405.99	154.119
3	510	1331	0	33.3218	310.57	6.7207	162.553
3	511	1445	0	43.4226	362.802	8.44961	174.883
3	512	1134	0	38.7473	367.733	46.7078	118.798
3	513	1400	1	65.1705	477.85	366.509	158.283
3	514	1304	1	48.2323	437.951	224.197	137.88
3	515	1199	0	64.1478	362.104	6.25106	137.177
3	516	1227	0	45.5177	355.928	6.65429	129.032
3	517	1116	0	40.5436	344.061	5.70019	128.534
3	518	1287	0	696.35	365.054	7.34936	154.816
3	519	1277	0	80.2501	385.117	9.15772	131.223
3	520	1179	0	94.672	366.489	6.51312	125.403
3	521	1140	0	41.1907	342.711	7.22885	128.6
3	522	1127	0	38.7559	342.192	5.94218	128.664
3	523	1035	1	35.0011	270.65	337.043	124.404
3	524	1715	1	78.0127	563.691	520.195	199.814
3	525	1083	0	38.4986	314.039	5.78886	125.529
3	526	1077	0	33.1619	317.571	5.48898	123.006
3	527	1098	0	78.5811	338.63	6.1897	123.389
3	528	1024	0	45.0289	327.346	94.1133	107.288
3	529	1982	1	157.274	599.555	826.214	262.435
3	530	1682	1	77.7888	557.908	572.194	186.094
3	531	1302	0	47.4016	403.268	113.641	134.946
3	532	1027	1	33.9955	269.141	346.055	125.501
3	533	1302	0	52.4674	378.04	7.52139	155.177
3	534	1522	1	72.6818	527.102	544.621	176.782
3	535	1254	0	93.2868	396.184	7.80719	141.656
3	536	1229	0	50.5538	344.594	7.28406	127.744
3	537	1366	0	95.1386	384.257	7.73655	144.58
3	538	2184	1	174.07	628.278	909.148	344.181
3	539	1808	1	77.512	578.728	608.877	214.881
3	540	1192	1	82.6076	295.085	180.562	139.746
3	541	1129	1	54.906	324.086	135.335	126.034
3	542	1043	0	35.2031	353.869	7.17122	105.823
3	543	1322	0	60.3981	353.093	8.62773	158.704
3	544	1379	1	79.9903	428.701	227.86	167.263
3	545	1476	1	63.0998	507.491	574.833	186.583
3	546	1168	0	129.155	373.802	7.36327	123.701
3	547	1002	0	38.1438	332.787	97.3292	104.018
3	548	1229	0	103.046	306.26	6.68458	151.162
3	549	976	0	61.8855	337.565	156.957	114.179
3	550	1085	1	124.375	297.12	259.614	114.882
3	551	3703	1	343.28	1178.44	674.612	473.182
3	552	1440	1	59.9624	555.47	576.631	166.521
3	553	1287	0	56.2051	369.732	8.80784	149.843
3	554	1314	0	50.3773	366.956	7.21286	147.042
3	555	1362	0	112.676	367.316	7.30797	166.839
3	556	1112	0	44.0903	349.368	33.8801	111.693
3	557	1731	1	87.2185	544.915	658.048	217.339
3	558	970	1	62.4998	273.731	331.107	118.429
3	559	1186	0	34.5763	339.371	6.76942	117.756
3	560	974	1	34.374	293.303	306.319	104.963
3	561	1872	1	152.778	611.242	713.738	212.769
3	562	2276	0	124.031	703.509	12.9546	277.392
3	563	2703	1	311.969	1488.82	1342.94	419.428
3	564	1069	0	78.4352	363.074	7.65791	113.775
3	565	974	1	49.6977	290.158	349.758	119.518
3	566	1209	0	58.1559	367.441	8.65579	142.882
3	567	1048	1	39.8401	280.352	337.121	128.002
3	568	1332	0	130.971	385.602	8.03488	138.923
3	569	989	1	42.3466	262.619	353.295	118.961
3	570	4210	1	377.213	1615.06	1376.36	465.606
3	571	1856	1	175.278	580.342	646.321	256.367
3	572	1168	0	99.9023	353.059	8.66586	135.042
3	573	1821	0	317.331	1037.58	916.216	301.575
3	574	1129	1	76.5583	349.179	291.694	132.711
3	575	1670	1	76.4391	599.792	535.074	199.364
3	576	1763	1	70.6156	665.505	560.28	217.751
3	577	1060	1	44.705	317.736	328.732	114.296
3	578	1159	1	45.0737	302.14	367.562	138.989
3	579	1419	0	72.1838	332.513	7.4672	172.826
3	580	1968	1	165.034	651.219	426.679	215.793
3	581	1092	1	61.8746	519.162	477.707	127.856
3	582	1106	1	46.5936	322.596	356.881	122.087
3	583	2480	1	135.261	1090.42	1035.04	293.733
3	584	1228	0	78.1674	349.674	8.15944	144.418
3	585	1455	0	59.0355	370.72	8.0634	180.002
3	586	2099	1	60.9187	609.867	607.232	222.299
3	587	1822	1	124.091	556.332	685.154	226.487
3	588	1022	0	47.4503	350.441	50.4039	111.146
3	589	1480	0	131.567	415.074	82.5129	159.254
3	590	1780	1	72.9877	611.163	282.408	185.731
3	591	1161	0	98.8234	341.066	7.83861	135.904
3	592	1088	0	43.1574	364.911	9.17853	108.931
3	593	1617	1	87.2454	644.229	597.767	210.914
3	594	1785	1	126.186	585.485	728.319	236.903
3	595	2211	0	114.282	732.099	15.3181	245.159
3	596	2666	1	139.071	1030.52	420.341	303.338
3	597	1001	0	42.9195	340.868	41.8543	108.427
3	598	1459	0	36.0566	371.5	8.21183	144.37
3	599	1097	0	41.9753	339.53	6.12218	126.774
3	600	2958	1	226.191	951.082	594.769	320.389
3	601	1064	1	48.0412	346.625	140.785	111.714
3	602	1345	0	54.094	399.073	7.93097	140.446
3	603	1238	0	49.2723	380.792	10.9724	128.868
3	604	1080	0	45.1798	360.892	6.61598	124.255
3	605	2183	0	107.624	710.009	128.451	233.744
3	606	1510	1	58.373	556.635	551.586	162.544
3	607	1033	1	37.2802	314.505	365.439	113.501
3	608	1014	1	39.2432	267.586	338.022	119.993
3	609	2115	1	122.881	912.618	617.961	278.675
3	610	1199	0	88.3841	561.456	16.0395	130.204
3	611	1394	0	67.2704	386.378	9.83091	174.145
3	612	1229	1	45.4322	445.112	207.863	134.185
3	613	2700	1	221.099	901.414	929.371	291.378
3	614	1523	0	38.7927	388.391	9.06114	151.92
3	615	1212	0	43.9394	346.989	6.58997	146.126
3	616	1521	0	158.026	392.275	11.0215	152.251
3	617	1059	1	68.1108	352.202	289.135	122.333
3	618	1013	0	43.0717	352.048	20.2515	108.713
3	619	1451	0	37.5336	370.551	7.91902	165.945
3	620	1207	1	70.2011	309.134	435.837	159.5
3	621	2994	1	207.759	939.619	678.226	352.219
3	622	3805	1	425.871	1771.94	1701.78	525.056
3	623	1303	0	70.5615	376.002	7.33777	141.29
3	624	1119	1	99.8246	322.218	310.857	118.966
3	625	1073	1	40.317	336.022	293.664	119.43
3	626	1247	0	69.8962	378.731	7.49203	133.624
3	627	1159	1	106.034	358.366	284.156	133.285
3	628	1261	0	83.4539	439.839	111.389	139.975
3	629	1422	0	99.5957	427.931	66.4795	156.702
3	630	1783	1	91.3364	588.457	713.236	239.025
3	631	1086	1	35.5721	320.983	275.102	118.044
3	632	1318	0	34.3071	389.712	7.28231	132.927
3	633	996	0	88.2058	332.254	5.90124	108.708
3	634	1114	0	40.5585	356.454	6.235	124.872
3	635	1568	0	58.0772	453.418	98.5848	200.023
3	636	1252	1	37.416	339.887	335.698	134.486
3	637	1678	0	42.7045	398.815	8.82658	165.943
3	638	1482	0	108.834	397.952	11.246	185.81
3	639	1138	1	57.9031	354.701	283.674	127.854
3	640	1327	1	76.7794	345.502	463.663	176.392
3	641	968	1	56.0076	310.232	294.351	104.958
3	642	1774	1	95.1313	640.296	621.956	215.45
3	643	1021	0	44.4133	361.431	22.2814	111.611
3	644	1140	1	64.5499	372.449	307.633	129.033
3	645	1184	0	51.2016	375.303	6.91928	126.613
3	646	1169	0	39.6637	360.356	7.43592	116.616
3	647	1262	0	54.3646	365.098	8.23896	144.097
3	648	1313	0	48.9404	383.212	7.35659	146.201
3	649	1393	0	55.1878	454.987	149.78	147.917
3	650	1026	1	48.089	322.729	300.009	106.96
3	651	999	0	63.3378	352.886	6.95361	102.805
3	652	1656	1	81.2651	552.472	711.782	213.867
3	653	1198	0	46.3021	374.571	7.63282	119.051
3	654	979	0	59.2018	358.916	6.88547	100.961
3	655	4342	1	297.879	1706.84	650.18	476.609
3	656	1466	0	56.905	420.973	106.185	167.063
3	657	2436	0	140.038	855.867	23.402	250.889
3	658	1483	0	75.5966	402.751	8.43	163.671
3	659	1156	1	57.0816	528.528	586.498	142.391
3	660	2908	1	189.269	1062.72	669.38	318.327
3	661	3310	1	160.535	998.814	239.267	368.569
3	662	1124	1	41.8784	335.655	318.873	118.547
3	663	984	0	110.194	462.012	9.65307	114.738
3	664	1165	0	40.65	354.823	6.96146	129.539
3	665	1624	1	167.322	531.44	531.212	189.47
3	666	1530	0	54.0326	350.412	7.95344	151.45
3	667	1332	0	57.7238	405.049	29.5408	139.787
3	668	1161	0	37.077	362.772	6.88014	115.935
3	669	1370	0	117.339	433.892	34.3881	152.095
3	670	2686	1	191.452	985.941	920.904	295.199
3	671	1365	0	36.4007	390.531	7.40145	135.417
3	672	1674	1	136.896	513.478	458.199	192.093
3	673	1436	0	65.473	400.372	10.6124	159.995
3	674	1232	0	59.3683	367.471	6.99127	136.19
3	675	2616	0	186.366	793.167	371.493	274.655
3	676	2053	1	84.4479	624.552	703.218	251.208
3	677	1591	1	158.332	698.6	654.247	1475.87
3	678	1527	1	78.6418	653.51	637.883	171.883
3	679	1305	1	79.421	344.863	511.705	165.31
3	680	1117	0	45.3677	408.978	6.4968	113.967
3	681	1481	1	60.0482	497.701	382.143	169.843
3	682	1419	0	71.8742	388.028	8.80548	178.557
3	683	1210	0	62.2193	355.627	6.63502	133.402
3	684	1368	0	134.164	374.046	8.5154	152.502
3	685	1103	0	34.3428	345.926	6.66983	120.459
3	686	1862	0	105.951	662.35	11.7421	219.797
3	687	1391	0	48.977	394.18	8.31991	142.137
3	688	1434	0	53.687	503.191	8.19208	145.906
3	689	988	1	49.5788	337.753	334.577	111.131
3	690	1051	0	57.056	353.477	98.2641	107.177
[truncated: 20,960 more rows]

## Sheet: phase_summary_table
Condition	EdU_Group	Phase	Total_Count	pHH3_Count	Phase_Percent	pHH3_Percent	phase_order	rep_order	group_order
0uM.rep1	Negative	G1	996	0	57.0774	0	1	1	1
0uM.rep2	Negative	G1	1097	0	65.2588	0	1	2	1
0uM.rep3	Negative	G1	1018	0	60.5952	0	1	3	1
0uM.rep1	Negative	S phase	435	0	24.9284	0	2	1	1
0uM.rep2	Negative	S phase	300	0	17.8465	0	2	2	1
0uM.rep3	Negative	S phase	377	0	22.4405	0	2	3	1
0uM.rep1	Negative	G2/M	219	0	12.5501	0	3	1	1
0uM.rep2	Negative	G2/M	200	0	11.8977	0	3	2	1
0uM.rep3	Negative	G2/M	196	0	11.6667	0	3	3	1
0uM.rep1	Negative	>4n	95	0	5.44413	0	4	1	1
0uM.rep2	Negative	>4n	84	0	4.99703	0	4	2	1
0uM.rep3	Negative	>4n	89	0	5.29762	0	4	3	1
0uM.rep1	Positive	G1	33	0	12.9412	0	1	1	1
0uM.rep2	Positive	G1	40	0	12.5392	0	1	2	1
0uM.rep3	Positive	G1	34	0	10.625	0	1	3	1
0uM.rep1	Positive	S phase	23	0	9.01961	0	2	1	1
0uM.rep2	Positive	S phase	21	0	6.58307	0	2	2	1
0uM.rep3	Positive	S phase	21	0	6.5625	0	2	3	1
0uM.rep1	Positive	G2/M	172	1	67.451	0.00581395	3	1	1
0uM.rep2	Positive	G2/M	216	0	67.7116	0	3	2	1
0uM.rep3	Positive	G2/M	219	0	68.4375	0	3	3	1
0uM.rep1	Positive	>4n	27	1	10.5882	0.037037	4	1	1
0uM.rep2	Positive	>4n	42	0	13.1661	0	4	2	1
0uM.rep3	Positive	>4n	46	0	14.375	0	4	3	1
2uM.rep1	Negative	G1	1006	0	72.7931	0	1	1	2
2uM.rep2	Negative	G1	990	0	74.4361	0	1	2	2
2uM.rep3	Negative	G1	1058	0	77.2827	0	1	3	2
2uM.rep1	Negative	S phase	187	0	13.5311	0	2	1	2
2uM.rep2	Negative	S phase	166	0	12.4812	0	2	2	2
2uM.rep3	Negative	S phase	132	0	9.64207	0	2	3	2
2uM.rep1	Negative	G2/M	153	0	11.0709	0	3	1	2
2uM.rep2	Negative	G2/M	142	0	10.6767	0	3	2	2
2uM.rep3	Negative	G2/M	139	0	10.1534	0	3	3	2
2uM.rep1	Negative	>4n	36	1	2.60492	0.0277778	4	1	2
2uM.rep2	Negative	>4n	32	0	2.40602	0	4	2	2
2uM.rep3	Negative	>4n	40	0	2.92184	0	4	3	2
2uM.rep1	Positive	G1	156	0	25.2427	0	1	1	2
2uM.rep2	Positive	G1	210	0	31.3433	0	1	2	2
2uM.rep3	Positive	G1	208	3	32.9635	0.0144231	1	3	2
2uM.rep1	Positive	S phase	74	1	11.9741	0.0135135	2	1	2
2uM.rep2	Positive	S phase	87	0	12.9851	0	2	2	2
2uM.rep3	Positive	S phase	96	0	15.2139	0	2	3	2
2uM.rep1	Positive	G2/M	346	4	55.9871	0.0115607	3	1	2
2uM.rep2	Positive	G2/M	321	4	47.9104	0.0124611	3	2	2
2uM.rep3	Positive	G2/M	293	5	46.4342	0.0170648	3	3	2
2uM.rep1	Positive	>4n	42	0	6.79612	0	4	1	2
2uM.rep2	Positive	>4n	52	1	7.76119	0.0192308	4	2	2
2uM.rep3	Positive	>4n	34	1	5.38827	0.0294118	4	3	2
4uM.rep1	Negative	G1	974	0	82.1941	0	1	1	3
4uM.rep2	Negative	G1	1034	0	84.3393	0	1	2	3
4uM.rep3	Negative	G1	866	0	73.2657	0	1	3	3
4uM.rep1	Negative	S phase	29	0	2.44726	0	2	1	3
4uM.rep2	Negative	S phase	38	0	3.09951	0	2	2	3
4uM.rep3	Negative	S phase	128	0	10.8291	0	2	3	3
4uM.rep1	Negative	G2/M	165	0	13.9241	0	3	1	3
4uM.rep2	Negative	G2/M	135	0	11.0114	0	3	2	3
4uM.rep3	Negative	G2/M	159	0	13.4518	0	3	3	3
4uM.rep1	Negative	>4n	17	0	1.4346	0	4	1	3
4uM.rep2	Negative	>4n	19	1	1.54976	0.0526316	4	2	3
4uM.rep3	Negative	>4n	29	0	2.45347	0	4	3	3
4uM.rep1	Positive	G1	286	0	35.092	0	1	1	3
4uM.rep2	Positive	G1	321	0	41.4729	0	1	2	3
4uM.rep3	Positive	G1	207	0	25.3056	0	1	3	3
4uM.rep1	Positive	S phase	263	2	32.2699	0.00760456	2	1	3
4uM.rep2	Positive	S phase	200	3	25.8398	0.015	2	2	3
4uM.rep3	Positive	S phase	177	0	21.6381	0	2	3	3
4uM.rep1	Positive	G2/M	209	7	25.6442	0.0334928	3	1	3
4uM.rep2	Positive	G2/M	209	3	27.0026	0.0143541	3	2	3
4uM.rep3	Positive	G2/M	363	6	44.3765	0.0165289	3	3	3
4uM.rep1	Positive	>4n	57	1	6.99387	0.0175439	4	1	3
4uM.rep2	Positive	>4n	44	0	5.68475	0	4	2	3
4uM.rep3	Positive	>4n	71	0	8.67971	0	4	3	3
