# Supplementary material for: A gene regulatory element modulates myosin expression and controls cardiomyocyte response to stress
Source: HighWire-hosted journal article supplement (doi:10.1101/gr.280825.125), 2025-10-22
Supplement: Supplemental_Table_S2.xlsx [file Supplemental_Table_S2.xlsx]

## Sheet: Index
Tab	Summary of contents
ATAC_counts	Counts table for ATAC-seq experiments
ATAC_deseq2_results	DeSeq2 results for ATAC-seq experiments. A positive fold change would an increase in chromatin accessibility following the treatment with the GSK3 inhibitor CHIR99021.
RNA_counts	Counts table for RNA-seq experiments
RNA_deseq2_results	DeSeq2 results for RNA-seq experiments. A positive fold change would an increase in gene expression following the treatment with the GSK3 inhibitor CHIR99021.
RNAseq_TPM	Expression levels for transcripts (TPM) across all samples
RNA_pos_GO_genes	DeSeq2 results for the genes used in GO analysis using gProfiler for genes increasing in expression following treatment is CHIR99021.
gProfiler_pos_GO_results	Results from pathway enrichment analysis using gProfiler for genes increasing in expression. All terms with an adjusted p value < 0.05 are present.
RNA_neg_GO_genes	DeSeq2 results for the genes used in GO analysis using gProfiler for genes decreasing in expression following treatment is CHIR99021.
gProfiler_neg_GO_results	Results from pathway enrichment analysis using gProfiler for genes decreasing in expression. All terms with an adjusted p value < 0.05 are present.
filtered_motifs_down_expressed	Meme Suite results for all motifs found in ATAC peaks decreasing in accessibility following the treatment with CHIR99021. TF motifs with TPM > 1 in atleast one replicate and FDR < 0.1 are displayed
enhancer_motif_down	Motifs associated with each enhancer decreasing in accessibility above our threshold
motif_frequency_down	Frequency of TF motifs in enhancer elements decreasing in accessibility
filtered_motifs_up_expressed	Meme Suite results for all motifs found in ATAC peaks decreasing in accessibility following the treatment with CHIR99021. TF motifs with TPM > 1 in atleast one replicate and FDR < 0.1 are displayed
enhancer_motif_up	Motifs associated with each enhancer increasing in accessibility above our threshold
motif_frequency_up	Frequency of TF motifs in enhancer elements increasing in accessibility
R3_motifs	Meme Suite results for all motifs found in R3

## Sheet: ATAC_counts
Geneid	CHIR.1	CHIR.2	CHIR.3	CON.1	CON.2	CON.3
chr1_10003_10465	7	24	22	21	9	51
chr1_16201_16290	7	21	23	2	2	32
chr1_17380_17538	6	11	11	5	4	16
chr1_180734_180997	11	14	15	11	6	33
chr1_181096_181166	2	0	3	2	0	3
chr1_181339_181576	16	17	11	10	5	15
chr1_183278_183341	1	2	4	0	0	0
chr1_184442_184514	10	12	7	4	1	16
chr1_187456_187523	3	6	1	0	0	4
chr1_191312_191574	16	22	30	16	12	49
chr1_267952_268051	26	40	25	13	7	39
chr1_778391_779234	312	680	469	215	153	531
chr1_789850_790377	7	2	3	5	1	10
chr1_820395_823084	67	72	68	51	28	139
chr1_826802_827783	84	189	135	68	40	158
chr1_835641_835753	4	4	5	5	5	9
chr1_845795_845908	2	9	4	5	2	10
chr1_847417_847486	3	9	8	1	0	4
chr1_850097_850279	6	6	16	2	2	5
chr1_855090_855219	8	2	7	4	1	9
chr1_858646_859036	44	97	61	26	8	100
chr1_865725_865820	20	26	23	11	5	29
chr1_866018_866482	24	70	51	27	12	59
chr1_869678_870221	115	203	165	68	48	244
chr1_875388_875711	12	9	15	10	4	22
chr1_876428_876777	13	19	21	10	7	36
chr1_876919_877224	17	20	17	8	7	26
chr1_886049_886164	9	5	2	0	1	10
chr1_886745_887034	11	11	13	7	5	20
chr1_889652_889724	1	4	6	3	3	7
chr1_890835_890957	10	4	7	4	1	15
chr1_897973_898233	6	7	8	2	2	25
chr1_902086_902335	10	12	18	6	1	29
chr1_903797_903954	19	11	7	3	4	19
chr1_904403_904969	42	115	92	39	33	143
chr1_905395_905504	5	22	5	8	3	22
chr1_906816_907075	31	39	31	16	8	30
chr1_910641_910825	14	7	17	10	1	28
chr1_911100_911573	23	42	23	29	19	80
chr1_921029_921414	82	173	135	55	48	169
chr1_923653_924039	65	105	101	60	27	139
chr1_924643_925180	66	103	66	28	11	91
chr1_935688_936202	71	123	103	49	24	103
chr1_938182_938410	71	132	90	38	22	98
chr1_940326_941003	86	159	115	52	40	162
chr1_941658_941944	25	77	63	37	19	83
chr1_942569_942688	21	40	26	7	6	52
chr1_944461_944584	11	30	16	15	4	25
chr1_959060_959450	73	132	114	67	38	112
chr1_960493_960763	40	67	41	35	18	89
chr1_960931_961137	27	26	15	22	9	46
chr1_966376_967303	134	231	192	122	72	319
chr1_975972_976617	120	240	198	76	43	202
chr1_984096_984545	49	84	66	30	21	100
chr1_997831_998063	17	20	21	29	17	74
chr1_999086_999315	51	111	73	41	19	107
chr1_999741_1000849	356	820	571	365	250	1073
chr1_1001736_1002056	129	264	212	130	74	379
chr1_1005126_1005653	157	278	190	111	66	335
chr1_1005954_1006046	7	2	8	8	1	10
chr1_1013217_1014117	147	232	198	91	57	251
chr1_1014390_1014634	10	17	9	4	3	22
chr1_1019329_1019941	118	292	206	113	56	391
chr1_1020092_1020665	70	91	72	55	24	148
chr1_1021138_1021368	40	76	56	26	27	92
chr1_1024766_1025364	43	51	62	37	20	97
chr1_1028008_1028151	14	12	20	7	10	17
chr1_1030317_1030429	6	1	1	4	0	3
chr1_1030488_1030582	6	3	5	4	1	16
chr1_1032781_1033532	188	322	255	134	85	325
chr1_1040491_1041012	116	232	216	100	62	325
chr1_1053731_1053924	14	12	21	13	5	57
chr1_1059136_1059930	104	250	141	98	52	228
chr1_1062663_1062785	21	46	22	13	9	30
chr1_1063762_1064413	78	187	134	68	30	179
chr1_1068555_1068718	16	27	23	18	5	46
chr1_1069103_1069625	69	119	101	46	40	138
chr1_1073287_1073505	17	21	26	10	5	49
chr1_1074463_1074580	16	12	24	8	2	23
chr1_1074730_1075031	18	32	41	22	14	55
chr1_1079426_1080596	224	414	323	211	144	614
chr1_1097332_1097408	4	1	9	0	1	13
chr1_1104258_1104352	4	9	7	4	1	10
chr1_1104465_1105241	39	87	54	39	24	105
chr1_1106710_1107172	16	20	25	8	9	31
chr1_1115826_1116872	482	1213	811	445	307	1122
chr1_1121985_1122551	151	314	238	113	60	323
chr1_1124044_1124108	3	2	3	1	0	5
chr1_1136230_1136449	19	13	22	10	4	22
chr1_1136490_1136587	7	5	8	3	1	11
chr1_1143533_1143764	22	6	28	7	7	23
chr1_1143773_1143852	3	2	4	2	1	7
chr1_1144409_1144900	33	58	53	23	10	88
chr1_1150519_1150835	20	25	19	13	8	33
chr1_1151356_1151788	27	18	28	20	8	39
chr1_1157134_1157208	11	7	9	1	1	12
chr1_1157421_1158173	97	222	189	97	59	266
chr1_1168917_1169119	21	20	23	11	5	30
chr1_1169942_1170069	16	11	11	10	5	31
chr1_1170735_1170850	5	14	13	4	3	21
chr1_1173653_1174150	34	63	49	25	9	76
chr1_1176408_1176606	15	18	17	12	4	33
chr1_1179429_1179537	16	10	12	4	3	10
chr1_1183077_1183436	23	23	22	15	10	28
chr1_1185014_1185516	30	36	32	10	7	59
chr1_1188073_1188222	13	28	16	7	5	24
chr1_1192436_1192747	5	2	4	5	1	14
chr1_1196533_1196688	13	9	11	7	8	20
chr1_1197485_1197641	11	6	9	3	1	24
chr1_1197751_1197951	11	14	12	10	4	23
chr1_1201349_1201772	32	83	82	54	22	106
chr1_1203589_1203759	23	17	17	10	6	26
chr1_1205025_1205335	34	20	39	17	5	43
chr1_1206307_1206830	68	108	71	39	32	102
chr1_1213446_1213809	23	24	21	14	7	79
chr1_1222233_1222460	8	22	17	8	6	47
chr1_1222979_1223122	18	16	10	6	2	38
chr1_1230785_1230916	25	38	32	12	10	54
chr1_1231288_1232329	372	788	637	317	166	930
chr1_1240809_1241223	45	85	65	29	19	104
chr1_1241950_1242148	21	14	30	16	11	43
chr1_1246512_1247019	33	62	51	40	18	83
chr1_1247161_1247296	12	13	17	5	3	25
chr1_1247329_1247820	28	28	30	24	13	76
chr1_1258718_1258933	16	20	16	9	8	18
chr1_1259270_1259508	18	19	21	11	7	22
chr1_1264857_1265785	51	52	61	61	31	122
chr1_1273127_1274591	243	446	319	173	100	447
chr1_1281308_1282341	118	161	132	51	27	136
chr1_1284679_1284793	9	13	11	6	2	9
chr1_1287105_1287344	20	22	18	14	3	33
chr1_1288450_1289930	22	5	25	19	4	41
chr1_1290226_1290548	72	185	124	32	12	143
chr1_1291682_1292246	123	266	209	73	42	231
chr1_1299044_1299313	42	58	57	21	9	75
chr1_1304600_1304986	45	111	90	44	27	133
chr1_1307430_1307653	29	66	45	27	14	93
chr1_1307788_1309206	252	601	421	229	160	722
chr1_1312824_1312979	21	12	14	8	10	44
chr1_1318353_1318589	32	78	71	41	36	138
chr1_1321333_1321856	32	25	40	26	12	68
chr1_1324346_1325271	209	503	367	204	115	468
chr1_1339084_1339194	7	14	8	9	3	37
chr1_1344724_1344856	34	68	47	13	16	57
chr1_1344892_1345027	17	6	14	6	4	20
chr1_1345506_1345603	13	12	10	4	2	22
chr1_1347988_1348339	52	109	88	58	31	158
chr1_1349315_1349455	31	120	75	21	19	97
chr1_1349620_1350000	77	186	130	55	43	183
chr1_1352301_1352458	16	14	19	13	7	22
chr1_1355515_1355695	19	36	27	19	14	53
chr1_1358017_1358256	21	45	27	23	11	57
chr1_1358620_1358735	22	20	21	14	6	39
chr1_1360152_1360232	18	14	13	7	1	32
chr1_1360536_1360853	32	28	43	30	21	94
chr1_1362099_1362269	27	37	35	14	6	66
chr1_1371995_1372293	64	115	120	46	29	97
chr1_1374962_1375637	525	1177	869	412	314	1197
chr1_1380526_1380793	9	15	16	13	2	31
chr1_1380961_1381152	12	9	10	4	5	31
chr1_1381506_1381682	12	11	10	3	6	18
chr1_1381793_1382184	24	18	13	9	6	30
chr1_1399071_1399865	555	1144	833	369	263	1125
chr1_1407047_1407752	124	269	192	127	80	272
chr1_1407757_1408010	20	44	38	19	18	60
chr1_1419118_1419352	13	12	20	15	5	30
chr1_1421130_1421352	15	22	16	6	9	14
chr1_1426079_1426302	16	41	35	8	4	41
chr1_1427571_1427851	27	54	53	15	8	78
chr1_1429787_1429861	13	34	21	5	4	38
chr1_1430481_1430642	27	65	51	14	3	40
chr1_1432016_1432158	23	67	43	19	12	41
chr1_1433260_1433664	71	179	143	45	26	121
chr1_1434312_1434763	93	157	145	32	13	84
chr1_1435370_1435869	125	290	206	94	58	279
chr1_1440797_1441311	113	207	165	76	34	169
chr1_1452472_1452637	10	14	17	4	1	22
chr1_1455558_1455939	15	21	16	4	5	38
chr1_1456770_1457230	19	12	21	19	9	41
chr1_1461827_1462081	12	15	14	6	6	39
chr1_1462277_1463033	44	57	41	23	14	54
chr1_1471331_1471994	167	394	256	169	71	355
chr1_1477310_1477523	7	5	20	6	3	23
chr1_1478416_1478577	5	9	9	5	1	16
chr1_1479349_1480138	34	24	33	22	15	45
chr1_1490242_1490431	13	6	15	11	4	13
chr1_1494750_1495086	24	15	25	7	5	34
chr1_1495261_1496376	52	54	63	31	16	107
chr1_1504730_1505228	27	41	32	16	13	62
chr1_1505589_1505733	13	34	24	7	7	24
chr1_1508604_1508751	18	22	16	10	7	20
chr1_1511043_1511194	31	71	62	9	12	41
chr1_1511489_1512354	323	599	416	197	143	557
chr1_1517860_1518201	12	9	14	10	6	21
chr1_1518304_1518586	11	11	15	5	4	15
chr1_1518695_1518800	7	4	6	1	2	7
chr1_1519890_1520086	9	6	11	4	3	25
chr1_1520778_1520887	1	9	5	5	1	16
chr1_1525141_1525307	10	11	21	12	1	14
chr1_1527342_1527646	10	15	25	9	5	29
chr1_1529404_1529600	14	10	12	1	4	13
chr1_1530726_1531708	28	18	31	9	7	41
chr1_1533276_1533689	32	43	56	22	15	69
chr1_1535587_1535727	27	15	13	9	4	41
chr1_1539552_1539937	66	110	108	44	28	118
chr1_1540395_1540956	107	262	199	105	50	267
chr1_1550792_1551403	104	249	170	43	38	171
chr1_1554816_1555145	28	20	32	17	9	50
chr1_1574113_1575417	170	314	214	104	66	313
chr1_1578189_1578289	9	11	11	11	4	9
chr1_1581192_1581313	3	3	6	3	3	19
chr1_1583007_1583279	13	9	13	2	2	32
chr1_1583297_1583877	15	16	33	13	4	33
chr1_1586259_1586440	7	13	13	8	0	19
chr1_1594122_1594214	9	7	23	0	4	23
chr1_1594519_1594820	15	37	30	15	5	36
chr1_1597530_1597898	52	114	79	22	13	58
chr1_1599573_1599851	38	88	50	29	17	83
chr1_1600370_1600725	22	22	34	17	19	58
chr1_1601436_1601581	15	18	15	6	6	17
chr1_1605783_1606218	10	13	21	9	6	23
chr1_1614252_1614428	21	45	46	21	8	75
chr1_1615115_1616414	411	888	630	326	185	805
chr1_1624914_1625525	159	322	274	118	87	379
chr1_1629478_1629555	9	7	13	8	2	17
chr1_1631425_1632458	104	192	151	104	64	325
chr1_1636591_1637044	20	10	33	15	10	35
chr1_1637073_1637439	8	11	15	4	7	21
chr1_1637700_1637810	9	9	4	2	0	14
chr1_1639376_1639633	10	6	10	1	2	11
chr1_1639749_1639861	6	4	3	3	1	16
chr1_1658786_1659425	119	242	169	98	56	241
chr1_1665021_1665210	8	12	14	3	4	16
chr1_1665728_1666062	25	20	22	8	13	31
chr1_1666560_1666819	15	12	18	14	3	15
chr1_1667511_1667686	14	34	31	11	5	22
chr1_1671393_1671600	8	3	4	7	3	20
chr1_1678266_1679127	79	113	84	27	9	77
chr1_1680466_1680626	8	9	10	4	2	11
chr1_1692400_1693351	170	392	284	129	78	367
chr1_1694432_1694641	7	8	6	1	3	6
chr1_1696721_1697014	12	15	22	10	2	24
chr1_1697441_1697701	15	6	11	7	5	21
chr1_1697828_1698057	13	11	11	2	3	11
chr1_1699519_1699637	6	3	8	2	3	8
chr1_1703720_1704575	23	36	33	14	9	62
chr1_1704730_1704890	1	5	6	6	0	5
chr1_1718158_1718429	2	2	2	1	0	4
chr1_1721352_1721588	11	10	5	2	3	14
chr1_1724094_1724736	230	504	380	198	126	560
chr1_1730938_1731248	13	16	8	6	2	21
chr1_1732486_1732648	8	2	10	2	1	28
chr1_1737824_1738136	10	8	13	6	0	16
chr1_1740308_1740432	5	1	4	0	1	9
chr1_1743236_1743348	3	4	9	4	2	6
chr1_1745773_1745850	6	9	9	10	1	17
chr1_1746022_1746711	88	209	137	72	46	204
chr1_1748817_1749285	26	22	29	16	4	45
chr1_1753083_1753224	13	18	14	8	4	16
chr1_1753711_1753810	6	2	11	5	0	15
chr1_1753838_1753984	7	15	7	8	5	11
chr1_1754190_1754450	17	21	19	10	9	33
chr1_1764337_1764579	22	33	38	9	5	21
chr1_1764921_1765018	6	4	5	5	2	10
chr1_1769103_1769165	5	2	4	2	1	4
chr1_1777021_1777335	87	159	119	26	11	59
chr1_1777961_1779245	179	352	263	148	101	443
chr1_1782338_1782556	18	12	21	10	10	36
chr1_1788130_1788533	35	86	64	15	7	46
chr1_1788712_1788849	10	6	6	7	4	9
chr1_1789145_1789277	14	16	22	5	4	28
chr1_1789934_1790138	7	6	8	0	3	13
chr1_1796514_1796721	10	23	18	4	3	17
chr1_1799729_1800099	39	65	56	25	18	49
chr1_1817971_1818226	7	12	13	7	2	23
chr1_1819325_1819642	9	6	9	2	2	14
chr1_1819857_1820060	7	4	10	1	1	16
chr1_1827182_1827357	9	23	17	6	9	20
chr1_1833005_1833123	13	16	19	5	8	14
chr1_1833508_1833726	5	6	9	5	3	19
chr1_1840393_1840719	12	15	13	11	4	26
chr1_1841457_1841599	7	5	16	2	7	4
chr1_1842980_1843077	11	19	11	4	3	23
chr1_1847124_1847541	63	130	107	31	14	81
chr1_1852956_1853358	17	18	25	14	14	38
chr1_1857329_1857610	18	21	24	7	3	23
chr1_1858549_1858919	17	52	26	23	13	63
chr1_1859103_1859595	20	23	23	7	13	20
chr1_1862948_1863181	5	19	11	8	4	30
chr1_1873146_1873600	169	308	232	70	62	248
chr1_1876578_1876849	19	23	22	9	14	73
chr1_1880767_1881033	8	33	25	8	4	38
chr1_1881784_1882067	17	24	21	5	8	30
chr1_1883616_1883828	17	19	14	10	0	20
chr1_1889978_1890455	49	91	50	42	17	92
chr1_1890467_1890591	8	10	7	10	3	37
chr1_1890974_1891998	202	484	345	168	109	551
chr1_1894109_1894271	11	15	12	5	3	29
chr1_1894588_1894659	9	5	5	2	3	7
chr1_1894686_1894934	16	14	16	10	1	25
chr1_1898172_1898478	19	15	18	7	4	24
chr1_1899274_1899494	22	31	25	12	5	23
chr1_1906293_1906647	136	282	210	79	62	252
chr1_1908486_1909438	253	500	358	209	133	483
chr1_1918965_1919939	228	511	371	184	129	473
chr1_1920664_1920902	20	30	24	13	8	37
chr1_1926087_1926160	11	10	11	6	2	32
chr1_1930184_1930366	17	5	14	14	9	22
chr1_1934563_1934901	4	7	5	2	2	6
chr1_1935642_1935950	6	28	7	7	5	25
chr1_1937134_1937313	9	15	3	10	2	24
chr1_1938965_1939061	6	6	14	3	4	9
chr1_1943908_1944482	167	263	179	96	54	279
chr1_1946605_1946868	50	47	29	18	12	66
chr1_1954748_1954872	11	10	7	4	2	24
chr1_1956588_1956902	16	12	17	14	3	34
chr1_1957724_1957910	21	22	29	9	4	21
chr1_1959893_1960391	152	285	199	105	61	322
chr1_1964228_1964298	7	6	8	3	0	11
chr1_1969302_1969537	13	35	29	7	5	43
chr1_1971096_1971654	44	11	35	15	13	52
chr1_1974847_1975183	14	26	17	21	11	56
chr1_1984510_1984652	15	7	16	6	2	14
chr1_1984705_1984867	7	11	10	12	3	19
chr1_1985403_1985978	31	42	48	25	16	80
chr1_1986463_1986824	20	31	27	15	8	42
chr1_1989163_1989316	14	12	9	10	2	31
chr1_1994616_1995314	22	7	21	16	4	35
chr1_2000856_2001018	6	11	8	7	3	17
chr1_2001998_2002122	4	14	17	5	1	10
chr1_2003557_2004075	81	144	107	53	28	128
chr1_2009148_2009661	29	18	17	15	9	45
chr1_2009894_2010178	7	9	13	5	4	21
chr1_2019288_2019407	11	32	20	9	5	55
chr1_2019576_2019862	18	50	25	25	12	63
chr1_2035527_2035676	12	18	16	5	3	14
chr1_2041877_2042037	21	22	18	9	7	24
chr1_2043369_2043509	9	10	9	6	5	23
chr1_2044809_2045235	71	171	112	40	27	153
chr1_2046590_2046716	55	86	59	34	16	69
chr1_2049503_2050885	295	736	426	232	119	657
chr1_2055466_2055580	6	7	9	2	5	9
chr1_2056240_2056362	10	7	11	8	3	12
chr1_2059779_2059858	11	8	9	3	2	10
chr1_2060132_2060370	13	12	17	9	6	27
chr1_2060639_2061926	62	45	51	35	20	96
chr1_2068661_2068863	11	15	5	9	4	13
chr1_2074399_2074580	28	12	12	11	2	32
chr1_2075191_2075423	14	10	11	13	8	39
chr1_2075717_2075920	13	14	19	7	1	18
chr1_2093184_2093516	18	8	26	13	6	21
chr1_2093575_2093942	19	17	22	10	12	29
chr1_2104602_2105239	49	90	78	39	26	123
chr1_2106642_2106766	7	8	8	2	2	17
chr1_2108544_2108858	44	61	78	18	17	68
chr1_2115626_2116329	45	69	61	33	17	111
chr1_2121177_2121349	6	10	12	4	2	13
chr1_2124484_2124693	16	20	16	9	7	36
chr1_2125842_2126100	19	17	9	5	4	24
chr1_2126640_2127079	27	36	33	19	7	55
chr1_2127480_2127648	8	13	15	13	3	33
chr1_2128142_2128297	10	7	11	6	3	20
chr1_2133058_2133850	339	740	531	224	153	598
chr1_2135358_2135831	439	926	640	278	187	925
chr1_2140072_2140250	10	25	31	9	4	34
chr1_2144593_2144723	8	11	13	6	3	10
chr1_2151103_2151431	23	23	15	9	4	35
chr1_2160254_2160909	50	86	59	26	16	74
chr1_2161446_2161566	14	8	16	5	5	17
chr1_2163320_2163498	27	13	16	17	2	38
chr1_2174239_2174731	84	142	128	55	26	144
chr1_2179664_2179756	15	19	18	6	3	26
chr1_2189499_2190116	241	573	414	182	123	551
chr1_2192185_2192354	49	91	46	25	23	75
chr1_2194683_2195594	345	719	541	319	214	753
chr1_2199176_2199746	195	432	344	168	105	514
chr1_2204515_2205040	78	136	117	58	42	168
chr1_2205221_2205598	74	179	149	69	46	212
chr1_2205614_2205761	4	13	11	5	6	19
chr1_2212303_2213112	161	287	206	95	70	308
chr1_2214131_2214468	44	81	59	46	9	82
chr1_2214796_2215139	47	69	67	20	13	45
chr1_2215584_2215908	21	28	15	10	7	25
chr1_2221113_2221192	3	6	5	1	0	6
chr1_2227438_2228108	428	1145	682	337	188	979
chr1_2229105_2229652	161	278	218	108	51	223
chr1_2231662_2231976	41	74	67	36	16	131
chr1_2238640_2238697	8	8	10	6	3	18
chr1_2240157_2240569	122	267	205	80	42	253
chr1_2243397_2243618	20	22	45	13	8	36
chr1_2246223_2246663	33	37	32	23	7	55
chr1_2247714_2247785	4	5	4	2	3	6
chr1_2251820_2252089	30	77	52	29	18	88
chr1_2267974_2268236	21	17	19	14	9	26
chr1_2270206_2271002	118	208	189	78	57	258
chr1_2275846_2276157	44	73	57	37	19	96
chr1_2277228_2277411	9	13	10	8	7	23
chr1_2277958_2278456	30	37	51	22	8	63
chr1_2278996_2279820	169	366	270	91	62	278
chr1_2284607_2284804	15	17	11	9	2	32
chr1_2286765_2286985	17	18	25	4	3	24
chr1_2289130_2289350	14	26	14	13	3	37
chr1_2299269_2299674	54	130	99	47	25	93
chr1_2300165_2300504	25	37	25	17	11	44
chr1_2304880_2305185	39	96	64	29	16	71
chr1_2311306_2311759	65	110	73	33	24	163
chr1_2313174_2313261	17	14	19	4	5	41
chr1_2314244_2315392	173	402	303	164	94	483
chr1_2322250_2322685	93	166	134	78	60	216
chr1_2322707_2322885	12	26	18	13	4	29
chr1_2329843_2330143	17	45	31	16	6	56
chr1_2330809_2331434	78	109	123	72	47	194
chr1_2340615_2340825	11	18	9	10	2	40
chr1_2344508_2344565	9	7	9	3	1	16
chr1_2344999_2345324	28	18	23	26	7	51
chr1_2347476_2347577	6	6	8	3	3	11
chr1_2347612_2347717	11	17	11	3	3	10
chr1_2348511_2348802	20	11	23	10	1	30
chr1_2355105_2355305	10	15	17	22	7	48
chr1_2356715_2356839	15	9	9	3	4	19
chr1_2360678_2360854	12	16	6	6	2	12
chr1_2372864_2373099	11	10	14	10	6	25
chr1_2381307_2381471	15	44	18	10	6	31
chr1_2381779_2382201	236	457	360	144	83	436
chr1_2382626_2382840	22	36	47	16	7	36
chr1_2383125_2383291	12	38	40	10	4	23
chr1_2391089_2392069	404	914	590	322	192	854
chr1_2406874_2406979	17	11	13	10	4	22
chr1_2412172_2413273	294	601	394	244	131	658
chr1_2414304_2414655	56	90	81	40	23	76
chr1_2426482_2426736	26	11	19	9	10	29
chr1_2428334_2428717	25	25	28	21	8	50
chr1_2431109_2431625	39	46	59	24	19	78
chr1_2440421_2440696	18	24	28	16	8	66
chr1_2443970_2444350	32	50	57	24	19	69
chr1_2451767_2452307	41	61	37	53	27	141
chr1_2459800_2460148	52	98	70	33	11	112
chr1_2462931_2463202	30	57	43	32	13	79
chr1_2467995_2468418	54	84	77	42	26	117
chr1_2471991_2472118	9	11	8	14	4	23
chr1_2473724_2474068	27	29	26	15	10	47
chr1_2481140_2481273	16	20	29	6	6	29
chr1_2482693_2482989	17	42	28	22	4	51
chr1_2491581_2491676	14	7	15	7	3	32
chr1_2491871_2491968	12	5	7	7	5	19
chr1_2506999_2507318	38	42	31	21	15	52
chr1_2522787_2522894	13	9	16	5	7	18
chr1_2525944_2526389	212	511	392	137	107	546
chr1_2526535_2527041	176	355	268	118	61	378
chr1_2534904_2535141	12	18	17	21	6	48
chr1_2543597_2543782	18	35	23	15	8	29
chr1_2545025_2545137	19	38	23	11	11	32
chr1_2545912_2546642	72	115	87	77	65	235
chr1_2546869_2547266	31	42	51	25	10	85
chr1_2548001_2548422	52	106	84	55	24	129
chr1_2554046_2554215	10	11	15	8	2	38
chr1_2554997_2555086	12	15	10	7	3	30
chr1_2556421_2556539	22	22	15	8	3	16
chr1_2558385_2558501	16	13	16	10	1	13
chr1_2567410_2567657	7	16	11	6	5	28
chr1_2569140_2569254	5	7	6	9	0	24
chr1_2575761_2575919	13	8	5	8	4	8
chr1_2578177_2578706	39	63	66	22	21	97
chr1_2585511_2585888	64	171	150	82	52	196
chr1_2586223_2587481	464	1084	784	400	244	1238
chr1_2594967_2595160	14	10	16	8	6	20
chr1_2596593_2596837	23	21	14	7	3	32
chr1_2611177_2611371	13	16	13	12	6	46
chr1_2612375_2612646	14	16	20	8	3	41
chr1_2630273_2631333	59	40	62	23	14	99
chr1_2641344_2641654	19	25	24	12	9	41
chr1_2642416_2643548	100	181	157	94	48	234
chr1_2652218_2657501	420	328	378	259	115	754
chr1_2658045_2658150	24	24	28	18	7	49
chr1_2659920_2662872	25	17	31	16	9	67
chr1_2670244_2671939	19	12	16	7	6	28
chr1_2673379_2673454	8	1	1	1	1	10
chr1_2674679_2676240	9	6	5	2	5	13
chr1_2676843_2678690	34	31	41	30	9	105
chr1_2680696_2686013	178	193	259	111	77	467
chr1_2686380_2689284	55	40	54	40	18	121
chr1_2690980_2691064	3	0	4	2	0	5
chr1_2691541_2695071	27	33	34	11	8	44
chr1_2748735_2753826	33	39	42	24	20	94
chr1_2754169_2754855	9	4	11	5	2	17
chr1_2756180_2756995	5	6	8	4	0	8
chr1_2759548_2759667	8	6	4	1	1	18
chr1_2769228_2770269	5	1	8	7	1	9
chr1_2771722_2774707	9	7	13	4	2	10
chr1_2777446_2777648	11	5	3	4	1	18
chr1_2777776_2777870	5	2	9	3	2	9
chr1_2778316_2778614	9	16	18	5	4	21
chr1_2789693_2789763	7	2	6	5	3	13
chr1_2797260_2797344	3	6	4	1	2	14
chr1_2800394_2800540	13	10	10	7	6	27
chr1_2810761_2810926	13	9	8	6	1	19
chr1_2818769_2818847	9	6	7	3	0	13
chr1_2819392_2819875	21	17	22	13	7	34
chr1_2840631_2840985	9	14	15	11	4	31
chr1_2847368_2847534	8	7	8	1	2	21
chr1_2848334_2848435	5	8	11	4	2	9
chr1_2849182_2849685	18	8	17	11	3	33
chr1_2856094_2856199	5	9	7	5	2	10
chr1_2870066_2870180	13	3	16	1	4	22
chr1_2877977_2878156	15	26	19	4	4	27
chr1_2883467_2883565	9	5	7	2	3	12
chr1_2883601_2883667	5	11	5	2	1	11
chr1_2896672_2896989	10	11	16	5	2	17
chr1_2897103_2897200	3	9	9	3	0	12
chr1_2919098_2919196	2	3	14	5	1	12
chr1_2926804_2927241	20	14	18	16	6	60
chr1_2930193_2930288	8	7	8	5	4	6
chr1_2938144_2938316	6	4	12	7	8	16
chr1_2939256_2939497	17	7	16	8	4	25
chr1_2945107_2945532	19	14	20	7	1	28
chr1_2952026_2952137	8	4	13	6	2	12
chr1_2960597_2961357	26	16	22	15	14	51
chr1_2970556_2970628	10	9	7	5	3	7
chr1_2971525_2971707	13	6	10	9	4	28
chr1_2973271_2973523	13	14	14	11	7	34
chr1_2974142_2974361	16	14	14	9	8	42
chr1_2979191_2979501	16	19	18	10	7	24
chr1_2980340_2980521	25	10	16	9	3	25
chr1_2982587_2982957	20	13	22	14	10	41
chr1_2985040_2985097	5	5	4	4	2	6
chr1_3003528_3003644	7	9	9	5	2	22
chr1_3012621_3012724	3	9	17	6	9	19
chr1_3015154_3015234	13	16	9	4	2	12
chr1_3020704_3020774	6	9	5	6	3	18
chr1_3022184_3022305	9	17	14	4	5	12
chr1_3049199_3049514	8	16	22	9	3	13
chr1_3050477_3050704	12	6	8	5	2	16
chr1_3054966_3055242	26	28	22	15	10	27
chr1_3060850_3061241	27	36	27	17	11	84
chr1_3066263_3066785	114	206	167	54	50	215
chr1_3069039_3069258	37	66	42	28	16	52
chr1_3069625_3070208	103	197	145	77	48	187
chr1_3072590_3072863	38	71	42	38	18	67
chr1_3074745_3075141	86	136	108	39	27	115
chr1_3084061_3084192	21	16	21	11	6	15
chr1_3095080_3095353	25	30	35	14	7	40
chr1_3104162_3104333	21	34	26	10	7	37
chr1_3105343_3106047	75	151	128	96	52	240
chr1_3112968_3113383	26	50	25	20	6	83
chr1_3113528_3113672	15	30	28	0	5	24
chr1_3114969_3115191	26	56	48	23	14	76
chr1_3119795_3120425	82	125	113	51	38	176
chr1_3126252_3126366	6	7	12	3	4	19
chr1_3127457_3127807	33	42	66	29	17	74
chr1_3137094_3137409	23	42	37	16	13	69
chr1_3139521_3140001	53	65	55	20	9	84
chr1_3146640_3146859	15	14	7	5	5	28
chr1_3149393_3149545	14	16	25	7	2	19
chr1_3153033_3153409	28	25	36	6	7	42
chr1_3157023_3157274	21	37	23	9	6	59
chr1_3160212_3160493	11	12	18	5	6	26
chr1_3163416_3163504	10	14	11	10	2	23
chr1_3164861_3165278	20	31	18	9	10	45
chr1_3170278_3171405	237	461	397	162	112	456
chr1_3174412_3174725	32	76	46	13	14	55
chr1_3178854_3178988	11	9	15	5	3	13
chr1_3179436_3179749	19	17	16	12	1	34
chr1_3186631_3186865	34	37	32	20	5	54
chr1_3187526_3187810	35	45	45	21	9	51
chr1_3188160_3188293	25	45	36	23	11	63
chr1_3191043_3191307	10	19	18	7	4	30
chr1_3197453_3197525	13	11	21	6	3	14
chr1_3197914_3198163	21	38	26	9	12	53
chr1_3198908_3199222	25	59	65	21	15	76
chr1_3206066_3206212	11	11	7	9	9	19
chr1_3211686_3211780	8	9	14	5	1	11
chr1_3219308_3219415	18	35	20	8	5	23
chr1_3221723_3221798	3	6	13	1	1	22
chr1_3221992_3222668	72	168	132	45	21	118
chr1_3229375_3229645	19	31	24	12	8	56
chr1_3236020_3236120	6	11	8	1	5	22
chr1_3236380_3236809	24	25	18	14	7	61
chr1_3241513_3241800	24	17	27	11	7	27
chr1_3249003_3249168	14	10	18	3	1	15
chr1_3249258_3249360	4	14	9	1	1	5
chr1_3251420_3251582	9	17	17	4	1	19
chr1_3259598_3259811	8	15	11	7	1	35
chr1_3263472_3263791	33	20	44	19	17	54
chr1_3270949_3271202	30	34	39	18	13	49
chr1_3277063_3277234	39	19	27	17	8	40
chr1_3277751_3277856	11	3	3	10	2	18
chr1_3283074_3283440	34	37	47	13	8	49
chr1_3283913_3284203	38	63	48	19	11	70
chr1_3291033_3291259	10	13	15	9	3	34
chr1_3291874_3292646	235	391	315	82	44	284
chr1_3296249_3296537	31	43	47	24	10	50
chr1_3304699_3305001	26	18	18	6	12	29
chr1_3306032_3306111	6	6	5	2	4	21
chr1_3311006_3311292	59	97	60	18	8	53
chr1_3312983_3313901	233	425	322	124	99	470
chr1_3320047_3320380	44	41	44	14	12	39
chr1_3320724_3321057	44	87	74	25	12	85
chr1_3322584_3322773	10	22	19	7	6	47
chr1_3323063_3323685	131	269	232	74	37	177
chr1_3328070_3328796	180	359	277	122	77	336
chr1_3329101_3329336	28	32	28	32	6	39
chr1_3329605_3330168	77	128	112	38	17	108
chr1_3338656_3339120	33	45	46	20	20	56
chr1_3347401_3347558	21	44	38	13	12	49
chr1_3348586_3349954	403	751	649	289	188	761
chr1_3350514_3350665	56	85	76	25	16	78
chr1_3350938_3351144	43	106	58	33	21	102
chr1_3352526_3352713	40	67	52	36	38	128
chr1_3352886_3353220	127	243	159	59	39	185
chr1_3360909_3361259	36	69	59	21	13	65
chr1_3365470_3365760	21	29	43	11	15	48
chr1_3367499_3367726	37	31	20	8	11	36
chr1_3369877_3370147	18	24	25	23	20	54
chr1_3382405_3382956	45	66	89	25	12	92
chr1_3393114_3394201	112	208	178	100	59	232
chr1_3403474_3403780	33	51	57	9	8	46
chr1_3405508_3405649	13	12	12	5	4	17
chr1_3410083_3410574	78	137	97	45	29	128
chr1_3411110_3411224	20	9	11	6	4	20
chr1_3423246_3423890	266	463	437	192	105	546
chr1_3424644_3424959	71	111	85	36	30	117
chr1_3431356_3431738	40	62	65	13	8	58
chr1_3435822_3435919	2	14	10	4	2	4
chr1_3439598_3439883	22	24	25	14	10	45
chr1_3440120_3440329	4	27	8	11	2	24
chr1_3453198_3453586	83	118	109	41	25	138
chr1_3454309_3454512	44	84	63	33	15	88
chr1_3454659_3454801	23	48	24	13	8	48
chr1_3458099_3458376	27	51	38	14	16	73
chr1_3460564_3460996	50	109	70	53	47	186
chr1_3471679_3472200	49	72	69	60	25	141
chr1_3473937_3474334	32	37	40	22	9	92
chr1_3477494_3477617	12	13	14	7	4	29
chr1_3479971_3480188	10	17	17	8	11	35
chr1_3480290_3480712	39	18	27	26	10	71
chr1_3482612_3482772	13	17	18	10	4	27
chr1_3483816_3484218	40	65	39	28	16	61
chr1_3491172_3491673	70	151	96	43	25	138
chr1_3491878_3492194	34	24	19	14	4	44
chr1_3502163_3502503	92	166	128	49	30	197
chr1_3510795_3511098	25	19	28	11	11	39
chr1_3511281_3511602	32	16	17	15	8	38
chr1_3516158_3516327	13	10	17	5	2	23
chr1_3517495_3517575	4	18	14	5	1	10
chr1_3520265_3520382	7	17	21	11	5	19
chr1_3529357_3529778	110	227	149	55	50	175
chr1_3530969_3532121	189	304	252	173	93	464
chr1_3542997_3543821	48	55	81	63	53	171
chr1_3548213_3548757	59	85	61	78	49	161
chr1_3553467_3553813	34	82	60	35	8	89
chr1_3565360_3565615	29	62	47	28	14	51
chr1_3566108_3566470	17	25	22	25	11	65
chr1_3567976_3568309	32	65	56	47	34	169
chr1_3573403_3573858	34	47	32	23	14	95
chr1_3577258_3577748	67	123	70	31	7	78
chr1_3583944_3584103	11	23	4	8	0	24
chr1_3585576_3585754	12	6	5	4	3	13
chr1_3586261_3586480	13	3	7	5	2	17
chr1_3590456_3590831	30	47	34	31	24	71
chr1_3602410_3602594	26	23	10	8	3	36
chr1_3611037_3611866	76	171	133	98	45	202
chr1_3613379_3613664	24	41	28	31	24	115
chr1_3619001_3619408	41	81	42	27	22	73
chr1_3621228_3621384	24	66	38	16	12	36
chr1_3624117_3625264	243	543	358	199	139	614
chr1_3625324_3625840	72	184	125	69	45	180
chr1_3631055_3631418	19	11	11	10	6	29
chr1_3631564_3631673	7	3	13	5	6	20
chr1_3633978_3634088	11	7	10	4	4	16
chr1_3640707_3640886	8	15	6	7	3	18
chr1_3647422_3647490	8	5	4	0	1	4
chr1_3649859_3650228	100	253	165	101	64	280
chr1_3651570_3651736	14	21	23	11	5	27
chr1_3652233_3652459	21	45	29	8	6	25
chr1_3652729_3652969	25	33	39	14	5	54
chr1_3654753_3654890	12	10	14	7	8	20
chr1_3657951_3658198	9	13	17	8	3	27
chr1_3663852_3664198	14	10	22	13	6	26
chr1_3668749_3669265	98	199	140	69	59	214
chr1_3674241_3674894	48	96	85	42	30	105
chr1_3684129_3684376	20	35	14	14	9	71
chr1_3685261_3685603	16	12	20	14	5	49
chr1_3695589_3696056	54	151	111	55	47	132
chr1_3703247_3703501	14	14	24	12	2	36
chr1_3707470_3707579	16	9	16	7	1	27
chr1_3712946_3713526	101	219	161	84	45	236
chr1_3717988_3718430	67	97	85	50	24	126
chr1_3724392_3724653	37	74	51	17	11	79
chr1_3727268_3727703	51	105	77	44	27	107
chr1_3730958_3731198	20	13	22	8	4	37
chr1_3734106_3734231	9	3	20	5	7	17
chr1_3745235_3745331	12	9	14	5	2	19
chr1_3745971_3746098	15	35	22	12	6	38
chr1_3746384_3746701	41	61	39	13	8	39
chr1_3746851_3747553	171	297	251	125	80	335
chr1_3752688_3752775	8	2	7	3	1	8
chr1_3755578_3755769	11	10	14	6	4	12
chr1_3762317_3762662	16	9	17	10	7	33
chr1_3762687_3763111	17	26	20	6	5	33
chr1_3763473_3763656	11	14	14	10	3	28
chr1_3763972_3764056	10	6	4	5	3	7
chr1_3771676_3771845	28	69	48	22	16	85
chr1_3772047_3772946	246	522	378	217	127	598
chr1_3774818_3775138	47	68	61	38	22	74
chr1_3775396_3775699	51	72	47	46	17	91
chr1_3776073_3776236	43	75	52	26	12	56
chr1_3785230_3785668	61	95	68	12	16	49
chr1_3788850_3789438	168	339	242	69	60	232
chr1_3789966_3790709	166	341	287	76	54	267
chr1_3795790_3796813	228	499	370	177	111	501
chr1_3801520_3801714	23	53	31	24	11	51
chr1_3804024_3804346	17	44	35	9	6	48
chr1_3809744_3809874	11	15	10	1	4	10
chr1_3811086_3811203	10	8	6	3	2	10
chr1_3811355_3811663	29	51	37	20	9	68
chr1_3814976_3815187	13	13	12	9	5	19
chr1_3817472_3817611	9	10	10	4	5	28
chr1_3817760_3817917	11	7	19	2	0	4
chr1_3817989_3818085	5	11	4	2	0	14
chr1_3827806_3828212	25	44	22	10	3	32
chr1_3849927_3850088	7	4	8	3	2	12
chr1_3856574_3856801	38	87	56	38	11	90
chr1_3856864_3857775	285	729	558	269	184	716
chr1_3867160_3867243	4	3	10	2	2	21
chr1_3868612_3868835	14	17	22	3	3	23
chr1_3869681_3870190	34	27	34	15	2	46
chr1_3876802_3877095	8	9	14	15	7	34
chr1_3881010_3881302	9	11	10	7	2	12
chr1_3886954_3887116	17	6	3	7	1	12
chr1_3895594_3895882	9	11	7	13	9	20
chr1_3900096_3901542	820	1982	1379	638	436	1666
chr1_3910807_3911236	68	89	72	31	21	89
chr1_3912516_3912826	13	22	17	12	8	26
chr1_3923783_3923948	14	9	6	5	2	24
chr1_3930735_3931010	14	13	13	6	1	23
chr1_3945214_3945362	10	10	6	2	0	11
chr1_3956672_3956820	8	5	8	3	3	10
chr1_3968220_3968299	2	4	3	3	1	4
chr1_3973440_3973805	8	5	5	7	3	24
chr1_3974824_3974909	9	3	7	3	1	5
chr1_3974999_3975257	12	4	11	2	4	34
chr1_3986703_3986790	3	6	3	5	4	7
chr1_3995313_3995508	4	10	14	7	4	27
chr1_4018665_4019199	19	11	31	10	9	44
chr1_4020513_4020778	16	3	13	10	3	21
chr1_4046816_4046950	7	4	3	4	2	23
chr1_4051100_4051209	5	5	5	5	4	16
chr1_4055263_4055385	15	6	3	4	2	20
chr1_4072955_4073106	2	4	6	2	4	12
chr1_4075945_4076138	8	7	9	4	4	13
chr1_4077718_4078586	14	7	9	6	3	17
chr1_4081787_4082118	11	12	25	10	2	26
chr1_4109689_4109815	10	7	5	3	0	20
chr1_4128560_4128775	12	16	7	3	5	33
chr1_4130121_4130360	13	7	17	5	5	12
chr1_4139013_4139156	9	8	6	3	3	19
chr1_4140972_4141070	5	5	3	5	1	17
chr1_4142952_4143058	5	3	5	2	1	11
chr1_4152673_4152772	8	2	3	3	1	9
chr1_4160356_4160492	11	10	6	7	0	15
chr1_4174797_4175027	9	5	17	4	1	18
chr1_4204215_4204375	3	3	2	2	1	8
chr1_4235344_4235448	9	3	8	4	4	4
chr1_4237091_4237218	8	4	6	4	2	7
chr1_4262788_4262936	7	3	10	6	1	16
chr1_4297892_4298018	6	8	9	1	2	14
chr1_4324540_4324674	6	3	7	2	3	8
chr1_4342545_4342773	14	10	10	4	9	17
chr1_4355159_4355295	7	5	7	5	1	27
chr1_4362365_4362471	7	2	6	5	3	24
chr1_4366900_4367281	19	23	15	9	8	28
chr1_4387466_4387617	9	5	4	8	1	11
chr1_4406232_4406403	14	6	7	2	2	12
chr1_4408456_4408536	3	4	3	2	2	6
chr1_4408816_4409033	5	7	7	10	8	17
chr1_4454307_4454567	7	12	7	4	4	17
chr1_4454652_4454774	4	6	8	0	3	6
chr1_4463771_4463964	10	10	11	6	4	16
chr1_4466760_4466875	10	6	9	5	2	12
chr1_4467424_4467610	6	6	12	9	3	25
chr1_4468390_4468564	9	4	4	13	1	18
chr1_4470912_4471338	21	11	32	3	3	26
chr1_4496445_4496815	13	11	19	4	6	23
chr1_4520440_4520545	4	5	12	2	0	15
chr1_4520854_4520934	6	5	5	3	3	7
chr1_4528779_4528852	5	1	7	0	1	6
chr1_4561372_4561502	5	4	2	1	3	7
chr1_4565609_4565710	3	3	2	1	2	7
chr1_4593271_4593398	7	2	5	6	1	14
chr1_4600273_4600414	2	1	3	4	2	9
chr1_4615625_4615855	9	12	15	6	6	24
chr1_4625060_4625183	7	5	16	4	3	8
chr1_4632447_4633413	34	12	22	17	4	48
chr1_4633479_4633676	8	1	6	7	3	14
chr1_4649219_4649697	12	5	18	5	8	29
chr1_4678848_4679057	19	5	8	5	1	18
chr1_4690925_4691036	5	5	6	4	3	16
chr1_4696856_4696996	11	11	15	4	1	21
chr1_4708257_4708524	5	18	9	4	7	7
chr1_4711916_4712064	4	2	2	2	4	10
chr1_4716907_4717033	2	2	3	2	4	7
chr1_4727128_4727440	12	13	12	5	4	25
chr1_4744560_4744842	12	7	11	8	3	37
chr1_4749199_4749390	10	7	24	7	3	18
chr1_4749488_4749630	5	6	7	0	4	7
chr1_4750079_4750258	8	11	7	1	1	13
chr1_4750402_4750587	11	3	7	0	0	7
chr1_4757284_4757476	7	4	20	6	1	25
chr1_4759121_4759213	2	8	4	3	4	18
chr1_4801764_4802009	8	6	9	0	4	10
chr1_4851523_4851822	9	5	5	1	3	11
chr1_4854605_4854696	0	0	4	2	3	4
chr1_4856927_4857182	8	4	10	9	2	8
chr1_4860119_4861246	9	12	16	12	8	33
chr1_4866751_4866860	2	2	6	2	1	9
chr1_4867078_4867211	4	5	6	3	1	5
chr1_4871258_4871356	8	3	5	5	3	13
chr1_4911517_4911657	4	6	4	3	4	22
chr1_4913717_4913782	2	4	6	1	1	12
chr1_4919188_4919320	4	3	7	3	1	10
chr1_4936814_4936959	4	6	5	4	0	24
chr1_4938669_4938770	1	5	3	1	1	6
chr1_4941581_4941690	2	7	5	1	3	10
chr1_4946337_4946824	16	13	31	8	4	31
chr1_4957961_4958024	5	6	3	3	1	7
chr1_4965054_4965198	4	3	5	2	0	16
chr1_4978782_4979002	11	4	13	0	3	12
chr1_5020763_5021138	11	4	6	4	3	18
chr1_5027614_5027719	5	2	2	0	3	6
chr1_5082496_5082686	10	7	2	9	0	10
chr1_5086839_5087089	8	10	12	7	3	9
chr1_5100078_5100153	5	5	1	1	1	8
chr1_5130901_5130959	3	3	9	2	2	7
chr1_5135694_5135876	5	1	4	5	0	8
chr1_5164645_5164717	4	2	8	4	2	14
chr1_5170835_5171155	10	4	5	6	4	12
chr1_5196527_5196656	12	3	6	4	2	9
chr1_5222773_5222998	5	5	11	2	1	7
chr1_5254548_5254753	10	3	5	4	5	22
chr1_5276061_5276170	2	4	5	2	4	7
chr1_5285296_5285532	8	5	17	4	4	13
chr1_5289179_5289341	2	7	5	2	1	10
chr1_5330448_5330732	6	8	7	3	6	22
chr1_5331011_5331438	16	9	12	19	9	25
chr1_5343091_5343658	16	21	12	7	9	27
chr1_5383174_5383238	4	3	5	2	4	4
chr1_5403473_5403648	7	5	7	4	6	19
chr1_5404626_5404758	5	10	2	1	1	7
chr1_5432260_5432541	12	6	15	7	2	24
chr1_5436737_5436911	8	6	9	4	1	30
chr1_5449350_5449514	6	2	4	4	5	10
chr1_5456634_5456742	3	5	5	4	0	14
chr1_5479071_5479372	9	7	7	3	0	16
chr1_5485897_5486211	12	7	12	2	2	18
chr1_5493035_5493107	2	2	8	4	3	12
chr1_5497833_5498157	17	10	17	5	4	40
chr1_5510002_5510152	14	19	15	9	7	37
chr1_5514681_5514794	8	19	22	10	7	39
chr1_5526718_5526844	7	7	6	2	0	18
chr1_5532410_5532601	2	3	4	6	3	18
chr1_5552638_5552982	10	9	12	9	2	28
chr1_5572005_5572193	14	9	8	7	2	16
chr1_5577796_5577991	5	10	14	4	8	8
chr1_5586757_5587204	13	8	12	5	5	19
chr1_5594686_5594755	7	2	3	1	0	7
chr1_5598381_5598657	16	7	16	3	3	22
chr1_5621090_5621276	6	12	10	8	4	38
chr1_5637814_5637908	5	2	7	4	2	9
chr1_5647219_5647443	7	9	3	4	1	18
chr1_5647478_5647613	9	5	10	6	6	22
chr1_5651025_5651171	2	5	8	6	4	13
chr1_5652378_5652833	11	19	28	20	10	51
chr1_5658524_5658652	3	3	5	3	2	16
chr1_5660184_5660563	31	75	44	40	16	97
chr1_5665031_5665131	5	7	12	7	0	11
chr1_5671439_5671684	9	17	11	5	2	25
chr1_5689316_5689552	13	9	4	10	4	25
chr1_5705443_5705542	9	13	4	9	1	10
chr1_5712123_5712299	15	5	9	8	4	18
chr1_5712615_5712712	6	9	3	3	2	4
chr1_5712852_5713193	12	17	18	9	5	31
chr1_5725372_5725512	11	9	8	6	4	15
chr1_5741345_5741559	8	5	21	7	5	21
chr1_5741688_5741820	8	1	11	1	4	9
chr1_5745849_5746234	40	89	65	44	27	117
chr1_5752979_5753229	18	24	24	9	16	36
chr1_5756466_5756652	10	2	10	4	1	20
chr1_5758166_5758346	10	17	9	5	5	24
chr1_5758910_5759063	10	9	8	1	2	19
chr1_5766406_5766706	12	6	16	6	3	30
chr1_5770994_5771525	36	75	68	30	21	111
chr1_5780964_5781310	20	11	13	12	1	34
chr1_5786681_5786959	13	12	6	3	2	9
chr1_5792633_5792698	8	2	8	2	0	14
chr1_5793653_5793742	9	4	3	3	2	12
chr1_5794329_5794558	14	11	17	5	5	17
chr1_5798251_5798450	11	9	19	9	3	20
chr1_5802093_5802263	8	5	11	9	4	20
chr1_5811007_5811193	5	3	10	11	1	11
chr1_5811223_5811341	1	1	5	3	1	2
chr1_5814174_5814441	16	20	14	6	2	38
chr1_5819975_5820155	10	13	10	8	6	27
chr1_5820769_5820955	11	11	9	15	1	19
chr1_5821978_5822283	10	8	16	8	4	13
chr1_5822327_5822802	18	21	11	12	7	35
chr1_5827884_5828057	1	7	8	2	1	16
chr1_5831415_5831586	20	7	14	5	8	16
chr1_5841981_5842055	9	5	6	3	2	20
chr1_5842948_5843064	8	19	5	5	6	23
chr1_5844160_5844333	16	4	13	6	3	22
chr1_5847212_5847564	35	65	52	22	13	89
chr1_5855640_5855955	16	12	15	7	5	33
chr1_5861922_5862036	8	7	6	6	1	30
chr1_5872898_5873151	15	24	22	4	4	32
chr1_5873762_5874033	11	13	17	7	10	28
chr1_5874698_5874922	18	10	9	6	3	24
chr1_5878000_5878359	26	9	14	8	7	30
chr1_5879719_5879790	2	4	2	1	1	7
chr1_5879897_5880009	3	2	4	4	0	10
chr1_5883722_5883834	16	11	20	6	1	18
chr1_5888030_5888260	9	12	16	14	2	35
chr1_5892487_5892834	10	13	19	8	4	31
chr1_5907075_5907290	9	7	6	2	5	9
chr1_5913613_5913863	19	18	19	7	6	42
chr1_5915919_5916243	21	19	28	16	14	49
chr1_5920362_5920504	16	6	4	3	1	2
chr1_5926906_5927292	13	8	16	11	10	25
chr1_5934328_5934654	21	13	17	5	5	33
chr1_5937992_5938170	10	10	7	7	4	16
chr1_5939468_5939758	8	18	16	3	3	21
chr1_5951916_5952164	10	7	10	9	2	20
chr1_5966702_5967050	19	19	18	12	3	32
chr1_5975091_5975575	88	166	112	42	28	132
chr1_5980458_5980890	26	47	34	22	9	77
chr1_5982943_5983059	7	10	9	7	2	17
chr1_5991581_5992019	52	61	58	36	21	96
chr1_5992020_5992927	489	1068	720	412	230	1053
chr1_5999827_5999958	12	19	11	5	2	19
chr1_6001973_6002466	43	75	63	21	13	86
chr1_6002829_6002925	11	21	15	6	5	18
chr1_6006943_6007280	13	20	28	14	9	38
chr1_6009217_6009476	14	10	17	8	3	43
chr1_6009537_6009683	4	4	1	4	6	5
chr1_6016307_6016416	4	7	8	3	5	20
chr1_6018452_6018591	5	18	3	5	6	16
chr1_6019914_6020180	18	22	14	6	3	12
chr1_6026124_6026402	22	11	15	8	9	34
chr1_6026592_6026745	11	14	12	9	2	26
chr1_6027003_6027521	26	14	27	10	7	52
chr1_6033994_6034835	80	135	132	55	34	170
chr1_6041518_6041682	21	22	28	11	11	28
chr1_6052569_6052752	15	39	20	7	18	36
chr1_6052972_6053183	17	34	28	15	8	43
chr1_6058580_6059095	42	80	63	14	21	65
chr1_6059923_6060036	9	10	12	3	2	21
chr1_6065151_6065299	14	15	14	3	7	18
chr1_6065545_6065649	5	9	11	8	4	11
chr1_6080712_6080812	15	25	18	3	2	21
chr1_6082378_6082631	34	25	31	12	8	36
chr1_6085881_6086131	18	32	29	9	10	35
chr1_6093172_6093309	8	18	12	7	2	25
chr1_6099782_6100040	20	25	36	17	5	40
chr1_6100510_6100590	6	0	10	6	2	12
chr1_6108939_6109435	37	71	72	33	19	123
chr1_6109564_6110048	20	17	19	16	6	45
chr1_6111843_6111946	17	14	15	4	3	12
chr1_6112521_6112885	18	29	25	14	6	45
chr1_6122022_6122142	13	13	7	5	3	15
chr1_6127625_6128048	37	75	58	54	33	135
chr1_6141767_6141894	14	19	10	4	2	13
chr1_6148432_6148976	66	124	81	38	32	166
chr1_6157182_6157383	13	13	10	7	6	22
chr1_6157524_6157918	18	22	23	14	13	57
chr1_6161619_6161918	34	54	52	24	16	66
chr1_6166093_6166289	13	9	13	6	3	28
chr1_6171642_6172072	47	86	66	29	19	84
chr1_6179087_6179633	36	58	49	26	18	74
chr1_6180301_6180460	17	19	11	8	3	26
chr1_6183655_6183939	11	28	16	13	8	39
chr1_6185324_6185515	2	1	11	8	6	17
chr1_6185762_6186026	11	17	34	16	7	19
chr1_6187840_6187926	5	8	6	2	3	11
chr1_6198966_6200076	379	764	569	300	181	776
chr1_6204998_6205512	152	308	264	150	98	405
chr1_6205741_6206438	288	586	429	231	160	636
chr1_6207086_6207578	179	301	253	97	60	266
chr1_6209139_6209477	69	143	106	49	36	144
chr1_6211834_6212008	7	9	14	6	3	21
chr1_6218023_6218307	33	24	28	14	3	41
chr1_6220408_6220583	12	17	16	3	9	29
chr1_6222612_6223048	57	82	108	21	28	110
chr1_6224783_6224936	15	9	16	8	9	34
chr1_6225285_6225838	30	36	48	22	21	92
chr1_6233521_6233622	6	2	5	6	7	10
chr1_6235653_6236240	115	338	244	124	63	390
chr1_6238780_6238880	30	34	29	1	3	31
chr1_6245096_6245548	139	262	212	74	44	242
chr1_6245760_6245883	5	15	12	5	5	12
chr1_6246795_6247010	73	136	87	33	33	144
chr1_6259874_6260290	48	56	57	29	14	93
chr1_6261029_6261437	61	116	70	43	30	116
chr1_6261866_6262069	29	26	31	11	11	56
chr1_6268549_6268645	10	26	19	7	3	25
chr1_6269673_6269925	14	18	24	11	2	60
chr1_6275987_6276815	165	281	232	89	74	308
chr1_6280969_6281058	15	26	19	13	6	32
chr1_6285049_6285242	17	15	15	11	5	36
chr1_6290006_6290394	27	68	44	13	11	54
chr1_6291683_6291777	11	7	6	5	4	22
chr1_6298695_6298958	16	22	15	6	5	16
chr1_6300383_6300493	8	14	5	2	2	17
chr1_6303752_6303924	9	3	9	4	2	21
chr1_6322336_6322593	16	18	21	8	5	26
chr1_6325631_6325769	9	7	14	10	2	14
chr1_6326125_6326188	10	3	11	2	4	16
chr1_6327100_6327228	9	11	3	5	5	18
chr1_6329527_6329626	9	19	6	4	4	5
chr1_6334207_6334408	13	3	14	4	5	22
chr1_6337098_6337280	22	5	11	5	6	22
chr1_6343362_6343897	101	146	134	46	32	162
chr1_6348059_6348264	39	79	36	20	17	61
chr1_6348697_6348941	17	23	31	10	2	45
chr1_6350420_6350824	76	124	97	62	37	142
chr1_6353879_6354338	38	81	55	39	30	118
chr1_6359390_6359985	92	209	144	63	47	194
chr1_6363165_6363411	43	77	58	21	16	70
chr1_6367411_6367699	19	26	25	5	6	23
chr1_6368002_6368067	4	8	8	2	5	10
chr1_6368477_6368865	25	25	27	9	7	30
chr1_6369072_6369179	0	5	0	0	1	12
chr1_6374223_6374754	29	26	15	9	6	49
chr1_6378244_6378707	21	31	34	10	6	39
chr1_6384967_6385983	65	70	61	24	19	84
chr1_6386040_6386183	11	5	4	4	2	18
chr1_6387038_6387243	7	17	9	3	1	8
chr1_6392827_6392956	10	14	13	5	5	17
chr1_6393009_6394180	361	765	521	296	173	756
chr1_6404761_6404907	14	44	24	10	11	27
chr1_6406301_6406447	8	5	3	3	0	5
chr1_6414433_6414766	30	59	44	23	19	40
chr1_6419038_6419346	29	39	35	21	10	45
chr1_6419635_6420038	21	53	40	23	13	85
chr1_6423406_6423908	58	82	74	31	18	80
chr1_6424178_6424281	14	31	18	8	2	27
chr1_6430091_6430419	15	42	36	15	7	50
chr1_6435738_6435902	14	11	16	3	3	33
chr1_6438101_6438431	46	65	47	32	16	68
chr1_6440389_6440509	12	15	27	8	5	27
chr1_6440609_6440876	21	34	41	17	9	39
chr1_6445044_6445495	42	84	65	28	15	91
chr1_6448594_6449132	65	114	112	36	19	120
chr1_6457324_6457390	5	10	10	6	2	14
chr1_6459814_6460091	27	28	21	9	2	30
chr1_6462518_6462614	10	6	15	1	4	10
chr1_6475455_6476078	92	107	105	44	34	141
chr1_6485195_6485520	32	54	41	26	18	69
chr1_6486242_6486339	4	8	3	6	4	8
chr1_6486430_6486885	165	279	221	111	77	307
chr1_6489988_6490205	73	206	140	53	39	162
chr1_6490475_6490898	102	210	175	77	50	199
chr1_6491706_6491808	10	12	14	13	3	23
chr1_6497231_6497895	77	198	137	77	64	261
chr1_6502241_6502395	13	9	21	6	5	20
chr1_6511584_6511904	31	31	36	11	4	34
chr1_6513350_6513577	19	19	21	10	11	45
chr1_6515769_6516186	22	27	16	16	14	64
chr1_6517499_6517802	17	18	9	13	5	37
chr1_6519894_6520496	74	162	136	40	38	143
chr1_6523738_6523864	14	32	20	9	6	17
chr1_6534344_6534575	11	7	6	8	6	10
chr1_6554042_6554754	152	336	244	117	77	298
chr1_6567592_6568094	13	6	7	7	6	27
chr1_6579620_6580290	354	666	550	246	150	650
chr1_6580557_6580775	33	51	37	22	16	70
chr1_6586625_6587057	62	97	85	26	22	80
chr1_6587276_6587743	82	101	89	25	9	59
chr1_6588908_6589242	44	50	77	10	5	45
chr1_6591291_6591719	56	95	99	13	17	55
chr1_6596749_6597189	70	98	91	33	13	81
chr1_6600838_6601444	209	485	304	114	87	254
chr1_6601830_6602019	36	58	33	20	11	65
chr1_6602032_6603322	429	1035	723	358	175	958
chr1_6603519_6603760	100	175	127	49	31	137
chr1_6604002_6604481	230	422	364	97	76	308
chr1_6612750_6614066	507	1235	777	453	277	1196
chr1_6614172_6614880	78	199	126	63	39	190
chr1_6619644_6619747	10	5	10	5	1	14
chr1_6624767_6625870	240	457	353	159	107	479
chr1_6634538_6635074	185	315	211	58	38	186
chr1_6646444_6646918	23	41	32	21	8	38
chr1_6657093_6657687	20	28	30	14	5	34
chr1_6667002_6667517	39	58	48	10	16	52
chr1_6672574_6673067	173	328	255	107	84	278
chr1_6674946_6675143	18	15	23	12	10	35
chr1_6686323_6686724	13	10	15	19	11	35
chr1_6691594_6691826	10	15	19	12	5	28
chr1_6701368_6702194	122	290	176	119	62	283
chr1_6704221_6704473	17	54	38	11	9	54
chr1_6715229_6715429	3	3	2	1	1	10
chr1_6715494_6715615	4	4	0	1	0	7
chr1_6720059_6720278	16	43	57	15	14	44
chr1_6722192_6723153	17	23	31	13	6	41
chr1_6724592_6725198	24	29	35	51	25	125
chr1_6727563_6727732	16	21	14	5	5	19
chr1_6738709_6738796	6	7	2	5	2	6
chr1_6739182_6739244	3	2	3	2	1	5
chr1_6743421_6744037	37	40	29	12	11	37
chr1_6747171_6747386	4	3	13	4	1	15
chr1_6747460_6747579	4	1	3	0	2	18
chr1_6758041_6758243	5	10	6	5	1	23
chr1_6770821_6770997	6	13	9	6	7	16
chr1_6777044_6777129	5	3	3	4	0	5
chr1_6784307_6785478	1083	2335	1612	774	534	2282
chr1_6793487_6793595	10	5	11	9	4	20
chr1_6802013_6802323	12	16	16	11	9	41
chr1_6803472_6803626	1	3	4	1	3	5
chr1_6811588_6811828	19	40	17	3	2	14
chr1_6816356_6816817	16	13	18	7	4	34
chr1_6822590_6822735	15	18	19	9	4	21
chr1_6832936_6833062	11	14	9	8	3	27
chr1_6839832_6839936	5	4	3	7	0	11
chr1_6842290_6842465	6	7	6	1	1	26
chr1_6859409_6859564	9	7	10	3	3	13
chr1_6860132_6860263	0	2	5	8	6	22
chr1_6864303_6864785	38	50	31	9	5	23
chr1_6867841_6868009	6	9	4	3	2	8
chr1_6870725_6870827	6	7	7	4	4	12
chr1_6874412_6874566	4	3	10	2	2	5
chr1_6874937_6875177	15	9	12	5	5	26
chr1_6888409_6888475	0	2	3	4	2	8
chr1_6889981_6890156	24	55	38	13	13	50
chr1_6891899_6892077	7	5	4	5	4	17
chr1_6904590_6904687	3	9	12	6	4	20
chr1_6907624_6907820	14	19	10	4	3	20
chr1_6916983_6917283	15	5	19	8	1	24
chr1_6918520_6918802	17	20	17	12	11	46
chr1_6924901_6925307	39	54	66	29	20	100
chr1_6925906_6926155	14	15	30	12	4	23
chr1_6934691_6934768	3	7	5	3	1	17
chr1_6941592_6941715	11	14	13	4	2	16
chr1_6944448_6944584	11	5	11	5	1	8
chr1_6949944_6950691	38	41	58	35	24	103
chr1_6960355_6960700	20	27	25	26	21	75
chr1_6962105_6963203	72	142	144	64	45	237
chr1_6977904_6978051	13	26	15	10	6	25
chr1_6979181_6979310	8	7	7	4	2	13
chr1_6985089_6985339	27	41	22	13	10	24
chr1_6991417_6991519	3	3	0	1	2	7
chr1_6998351_6998549	11	42	36	10	5	36
chr1_6999947_7000105	5	10	11	5	1	8
chr1_7003421_7003586	15	24	15	14	7	46
chr1_7010298_7010358	5	3	5	3	1	11
chr1_7013910_7014357	73	75	89	55	53	166
chr1_7044165_7044386	18	13	19	10	4	19
chr1_7046345_7046656	31	65	59	32	19	81
chr1_7051410_7051527	9	13	10	10	0	27
chr1_7052707_7053001	19	19	27	10	8	43
chr1_7060461_7060586	13	10	9	2	0	9
chr1_7061314_7061440	10	8	8	3	1	9
chr1_7069959_7070314	21	25	31	18	8	45
chr1_7070436_7070816	45	60	56	33	26	77
chr1_7075452_7075609	20	50	33	15	8	63
chr1_7085573_7085749	14	12	11	17	9	16
chr1_7101675_7101813	7	0	6	4	3	8
chr1_7103472_7103809	15	5	6	4	3	21
chr1_7117469_7117879	21	23	34	19	14	65
chr1_7121641_7122015	30	55	33	14	11	43
chr1_7122480_7122596	8	10	13	4	2	11
chr1_7136286_7136401	11	2	6	1	3	14
chr1_7142032_7142138	7	8	5	1	2	10
chr1_7148059_7148362	9	5	10	5	3	17
chr1_7148769_7148908	10	12	14	7	5	11
chr1_7149455_7149892	24	38	38	21	12	33
chr1_7155023_7155315	9	18	15	6	2	24
chr1_7156563_7156695	5	5	5	4	2	13
chr1_7177682_7177871	8	9	14	3	5	18
chr1_7195352_7195635	10	8	17	5	1	16
chr1_7198261_7198483	14	11	15	2	2	18
chr1_7199330_7199690	19	11	13	8	6	21
chr1_7207881_7208357	33	62	51	22	12	54
chr1_7208858_7208976	11	4	8	4	1	7
chr1_7209486_7209645	12	16	11	5	8	33
chr1_7218365_7218502	6	14	4	4	1	4
chr1_7222590_7222829	9	5	13	5	3	15
chr1_7229111_7229297	4	12	10	4	4	17
chr1_7230681_7230986	19	13	13	6	6	25
chr1_7245999_7246331	12	14	19	9	4	13
chr1_7247074_7247401	10	8	7	3	4	14
chr1_7252635_7252728	3	7	2	0	0	9
chr1_7266211_7266407	11	9	5	10	5	13
chr1_7285959_7286183	8	4	10	4	0	6
chr1_7291348_7291958	92	160	89	41	32	118
chr1_7293051_7293500	68	163	114	56	56	208
chr1_7299335_7299819	22	31	29	30	17	86
chr1_7303013_7303112	10	12	11	3	1	20
chr1_7309386_7310820	7	3	5	1	6	29
chr1_7313068_7313220	0	4	2	1	4	4
chr1_7313315_7313470	2	1	0	3	0	8
chr1_7318124_7318228	4	10	6	3	2	6
chr1_7331626_7331794	5	4	7	3	4	10
chr1_7341146_7342071	47	105	66	54	26	138
chr1_7346905_7347173	24	23	20	21	9	37
chr1_7350079_7350163	7	4	9	5	3	8
chr1_7363510_7363963	54	79	83	58	28	116
chr1_7364849_7365035	10	6	12	2	4	22
chr1_7366687_7366815	15	16	26	12	6	23
chr1_7369609_7370201	64	105	126	60	52	187
chr1_7376535_7376894	13	12	11	4	6	19
chr1_7379687_7379912	22	18	13	10	3	20
chr1_7386353_7386512	8	11	6	4	5	11
chr1_7388818_7389796	84	106	112	45	36	149
chr1_7401845_7402193	21	31	32	37	36	117
chr1_7418615_7418891	15	8	12	7	5	11
chr1_7420502_7421024	38	79	67	40	28	109
chr1_7439252_7439372	2	6	7	4	4	12
chr1_7440298_7440380	4	8	9	10	5	17
chr1_7456010_7456123	16	28	23	9	3	23
chr1_7456484_7456954	76	168	125	55	47	167
chr1_7469362_7469504	6	12	12	9	4	18
chr1_7470952_7471476	24	32	42	42	16	90
chr1_7473208_7473376	4	10	18	8	3	17
chr1_7479037_7479137	15	10	15	11	5	17
chr1_7482821_7483087	16	15	27	11	11	62
chr1_7483570_7483685	4	12	10	7	5	11
chr1_7492209_7492462	10	9	18	8	4	30
chr1_7495912_7496177	21	36	21	9	6	22
chr1_7496280_7496374	5	13	11	3	6	2
chr1_7496845_7496978	4	5	8	3	5	30
chr1_7498452_7498701	7	8	13	4	5	14
chr1_7500541_7500728	12	26	21	6	4	29
chr1_7505736_7506285	73	93	105	40	29	122
chr1_7509149_7509371	20	21	21	8	17	34
chr1_7513237_7513405	14	4	5	3	3	15
chr1_7516382_7516589	41	74	64	40	34	147
chr1_7518002_7518346	34	70	47	32	19	104
chr1_7525143_7525230	10	4	1	1	2	11
chr1_7526334_7526897	17	34	32	15	8	38
chr1_7528518_7528618	3	6	5	5	2	16
chr1_7529080_7529355	16	29	15	8	6	27
chr1_7537345_7537594	20	27	30	10	7	45
chr1_7548300_7548483	7	4	11	5	5	14
chr1_7549358_7549528	12	9	22	19	5	45
chr1_7553397_7553499	14	24	22	8	6	38
chr1_7554940_7555167	20	39	35	30	17	45
chr1_7557923_7558434	69	113	88	55	49	151
chr1_7560558_7560754	20	20	18	13	2	35
chr1_7561574_7561672	10	23	16	2	1	24
chr1_7562199_7562299	0	2	4	3	0	12
chr1_7570785_7570876	11	3	3	1	1	7
chr1_7577207_7577505	16	34	29	20	7	59
chr1_7586008_7586656	45	97	62	31	18	102
chr1_7590172_7590445	20	25	27	19	13	50
chr1_7594433_7594676	7	12	12	6	6	36
chr1_7595495_7595641	8	18	14	8	2	27
chr1_7596292_7596757	12	16	22	9	6	26
chr1_7611546_7611744	8	11	13	4	3	27
chr1_7613318_7613763	24	10	18	15	11	92
chr1_7614557_7614742	20	26	13	13	10	40
chr1_7616462_7616710	36	50	48	20	18	84
chr1_7617033_7617308	19	19	19	20	12	66
chr1_7621312_7621537	10	18	16	15	9	40
chr1_7624702_7625056	23	23	32	19	14	80
chr1_7631819_7632034	10	13	21	15	2	16
chr1_7632905_7633067	10	10	15	13	4	21
chr1_7642125_7642448	27	46	30	33	31	94
chr1_7645395_7645819	59	114	91	41	15	117
chr1_7647370_7647519	9	44	16	11	15	52
chr1_7651572_7651803	10	9	8	7	6	45
chr1_7661983_7662167	13	23	13	8	7	34
chr1_7663244_7663606	26	19	16	14	8	40
chr1_7664775_7665134	13	12	24	17	8	39
chr1_7667508_7668054	82	177	135	69	45	167
chr1_7669526_7669959	56	67	58	30	13	70
chr1_7672919_7673254	38	55	56	23	7	58
chr1_7677912_7678018	4	11	7	6	5	11
chr1_7680052_7680761	98	208	140	92	35	255
chr1_7680837_7681118	8	34	34	9	13	33
chr1_7702490_7702643	16	44	27	12	9	50
chr1_7704518_7704916	179	438	292	173	107	493
chr1_7705655_7705756	6	14	7	5	4	18
chr1_7719817_7719960	12	14	10	12	5	41
chr1_7722781_7722870	9	13	8	7	8	26
chr1_7752633_7753079	22	30	27	8	11	24
chr1_7755596_7755702	13	24	19	6	1	12
chr1_7761235_7761340	3	7	6	4	7	21
chr1_7770922_7771987	126	276	204	125	69	266
chr1_7783472_7784336	487	1259	912	450	310	1352
chr1_7809758_7809994	8	4	2	2	1	16
chr1_7827281_7827393	10	5	4	3	0	10
chr1_7845631_7846066	10	10	9	10	9	35
chr1_7856519_7856629	9	12	9	3	1	8
chr1_7860289_7860363	3	3	5	4	0	7
chr1_7864000_7864173	13	7	10	4	5	22
chr1_7865928_7866125	8	3	4	1	5	11
chr1_7874518_7874638	6	7	3	3	1	12
chr1_7875351_7875708	13	9	10	8	5	19
chr1_7875876_7876325	14	19	16	11	9	23
chr1_7885485_7885792	12	17	13	5	10	10
chr1_7892053_7892250	7	8	11	3	8	23
chr1_7892625_7892767	13	1	2	1	3	9
chr1_7894411_7894603	9	3	4	5	2	18
chr1_7901913_7901999	4	2	6	2	1	8
chr1_7902726_7903026	25	43	42	17	17	56
chr1_7920620_7920815	0	2	3	2	2	17
chr1_7932729_7932913	11	5	11	5	4	4
chr1_7942258_7942727	55	102	51	37	11	96
chr1_7945179_7945299	6	4	7	3	1	6
chr1_7948925_7949237	7	6	9	4	7	23
chr1_7954068_7954345	14	5	8	9	6	22
chr1_7956704_7956898	17	6	15	20	11	44
chr1_7961180_7962017	890	1840	1355	610	401	1613
chr1_7975332_7975565	82	180	121	41	27	153
chr1_7982276_7982639	21	36	38	24	14	41
chr1_7989800_7990097	31	62	34	18	12	53
chr1_7990383_7990489	4	5	7	1	2	7
chr1_8004162_8004261	7	5	8	3	3	17
chr1_8004702_8005454	108	179	170	166	107	450
chr1_8010173_8010239	6	2	4	3	0	7
chr1_8015035_8015332	22	44	28	16	6	34
chr1_8015955_8016202	8	11	9	3	6	26
chr1_8025736_8027230	363	715	468	288	140	711
chr1_8040583_8040904	27	51	69	21	6	56
chr1_8048300_8048382	8	3	5	7	1	21
chr1_8061258_8061531	9	15	13	16	13	56
chr1_8075515_8075725	9	8	8	9	2	20
chr1_8077163_8077496	12	41	40	20	14	85
chr1_8078267_8078725	16	12	30	18	19	70
chr1_8083192_8083305	9	19	17	12	11	24
chr1_8083682_8083815	7	16	6	1	5	20
chr1_8090519_8090656	3	5	6	6	3	14
chr1_8097470_8097757	3	9	16	23	16	44
chr1_8115797_8116073	19	21	19	11	10	39
chr1_8118050_8118185	8	1	4	3	2	7
chr1_8118226_8118516	10	6	10	6	2	18
chr1_8121330_8121799	26	39	49	21	11	48
chr1_8125826_8126010	8	5	1	3	0	8
chr1_8134088_8134371	11	16	9	12	6	30
chr1_8136951_8137028	14	5	12	4	2	13
chr1_8154768_8155000	16	14	21	5	8	30
chr1_8166173_8166278	4	5	2	4	0	10
chr1_8168073_8168143	5	7	9	0	0	7
chr1_8170232_8170530	13	9	12	8	2	15
chr1_8183970_8184144	3	12	3	2	1	7
chr1_8190036_8190188	8	6	2	3	4	19
chr1_8197809_8198253	11	22	25	22	19	70
chr1_8201287_8201593	8	14	14	10	10	35
chr1_8202228_8202790	28	31	40	28	18	80
chr1_8211997_8212213	12	8	11	13	5	36
chr1_8221442_8221668	12	8	13	5	5	18
chr1_8226800_8227030	16	17	15	3	1	18
chr1_8238136_8238673	19	37	32	24	15	78
chr1_8239710_8239934	6	8	13	5	7	19
chr1_8240848_8241205	7	9	6	6	4	19
chr1_8241503_8241568	4	1	3	3	0	4
chr1_8250987_8251103	7	5	6	1	1	16
chr1_8265402_8265539	7	10	7	2	2	13
chr1_8269227_8269385	5	6	13	8	9	21
chr1_8277146_8277225	3	2	4	1	0	6
chr1_8278984_8279081	8	1	2	3	0	5
chr1_8284177_8284466	3	6	8	6	0	26
chr1_8293215_8293563	5	7	9	22	9	60
chr1_8307776_8307974	9	9	10	1	1	24
chr1_8312358_8312470	14	22	24	6	10	19
chr1_8314400_8314723	66	120	79	44	41	111
chr1_8317979_8318401	50	110	88	45	25	124
chr1_8323730_8324016	26	24	25	9	9	32
chr1_8324579_8324710	8	3	5	2	1	18
chr1_8329536_8330055	29	34	16	14	14	34
chr1_8330228_8330786	27	15	23	18	6	41
chr1_8335561_8335905	20	9	8	9	3	32
chr1_8338388_8338526	9	7	12	8	2	14
chr1_8343359_8343849	25	21	24	30	14	56
chr1_8348949_8349230	33	91	59	24	14	75
chr1_8351548_8351700	5	9	10	6	5	30
chr1_8351708_8352112	49	61	43	10	14	72
chr1_8357786_8357898	12	8	17	6	6	22
chr1_8358979_8359203	17	28	22	9	12	29
chr1_8368020_8368131	10	19	20	3	3	25
chr1_8371034_8371181	28	42	38	14	13	41
chr1_8371481_8371850	35	36	37	27	11	44
chr1_8373556_8374244	184	293	234	99	68	255
chr1_8381935_8382429	61	141	95	46	32	102
chr1_8390170_8390371	7	9	19	9	3	16
chr1_8391207_8391505	17	17	28	10	12	40
chr1_8396309_8396560	32	61	31	26	16	80
chr1_8396919_8397371	86	131	120	85	52	269
chr1_8402202_8402679	39	48	43	29	22	59
chr1_8407079_8407278	14	17	17	11	10	24
chr1_8408140_8408471	51	101	62	37	17	70
chr1_8409099_8409616	100	237	155	61	63	189
chr1_8412227_8412542	34	50	49	21	31	126
chr1_8422943_8423189	28	49	36	26	17	59
chr1_8423352_8424406	167	400	266	126	72	324
chr1_8424888_8425136	38	89	48	20	16	71
chr1_8428975_8429073	5	4	8	4	0	7
chr1_8432017_8432112	6	16	12	1	4	4
chr1_8434062_8434200	13	18	15	8	2	11
chr1_8439000_8439428	100	180	160	75	42	154
chr1_8440102_8440295	30	50	41	14	9	47
chr1_8443536_8444083	23	42	47	14	7	46
chr1_8447774_8448072	12	12	20	13	10	37
chr1_8448968_8449480	33	73	45	22	21	64
chr1_8450047_8450182	10	11	14	2	0	11
chr1_8451638_8451864	6	5	20	1	5	9
chr1_8455759_8456152	21	37	20	22	14	66
chr1_8456338_8456798	24	65	56	31	16	84
chr1_8457160_8457264	6	11	10	9	3	23
chr1_8460179_8460338	12	17	8	5	2	18
chr1_8462479_8462673	21	22	15	6	4	17
chr1_8463197_8463927	50	94	102	29	26	103
chr1_8464407_8464820	16	27	22	10	11	43
chr1_8478632_8478710	7	7	11	3	2	14
chr1_8481774_8481924	3	3	6	7	3	12
chr1_8481950_8482142	5	3	14	2	2	4
chr1_8483191_8483405	9	10	8	9	5	30
chr1_8497480_8497773	9	8	7	7	2	9
chr1_8503378_8503522	7	13	8	2	1	5
chr1_8506550_8506724	7	14	21	10	5	33
chr1_8506987_8507242	22	19	14	11	11	38
chr1_8510192_8510473	14	10	12	13	6	20
chr1_8518227_8518482	10	13	13	10	11	29
chr1_8525315_8526261	250	503	332	149	116	422
chr1_8542059_8542446	40	51	65	27	9	79
chr1_8550133_8550233	5	13	9	5	2	9
chr1_8552915_8553408	15	16	26	11	4	27
chr1_8561170_8561464	11	17	23	6	2	20
chr1_8563018_8563195	12	26	20	9	2	14
chr1_8563358_8563751	15	23	23	12	8	33
chr1_8570544_8570750	14	33	22	19	10	41
chr1_8571667_8571856	15	29	22	8	4	34
chr1_8580658_8580982	86	116	122	23	21	77
chr1_8590781_8591177	28	73	44	21	17	49
chr1_8597628_8597723	9	8	9	7	2	17
chr1_8598103_8598675	48	79	80	37	28	92
chr1_8598834_8599144	36	57	32	11	8	62
chr1_8602988_8603078	11	4	21	7	3	18
chr1_8614129_8614314	2	4	2	2	0	11
chr1_8626454_8626834	31	80	50	65	35	171
chr1_8629371_8629961	41	103	73	43	26	123
chr1_8631264_8631391	6	22	27	17	12	27
chr1_8646787_8646938	12	8	16	5	3	15
chr1_8660322_8660781	34	76	73	53	36	163
chr1_8664109_8664313	20	20	22	12	4	35
chr1_8670501_8670925	31	42	62	26	20	67
chr1_8671460_8671554	6	16	10	2	4	19
chr1_8679303_8679654	14	29	23	19	13	39
chr1_8701058_8701351	45	83	57	26	25	91
chr1_8702971_8703735	293	600	448	202	119	599
chr1_8707043_8707374	55	96	79	31	33	106
chr1_8712238_8712671	54	123	76	49	35	121
chr1_8712831_8713009	10	29	16	14	6	30
chr1_8717826_8717977	5	15	6	2	4	11
chr1_8719107_8719276	13	16	16	9	3	22
chr1_8721847_8721974	8	9	10	7	4	21
chr1_8723675_8723959	8	19	16	6	1	13
chr1_8726479_8726673	13	18	19	4	4	27
chr1_8728043_8728149	8	14	18	3	3	10
chr1_8740261_8740409	5	5	4	0	1	19
chr1_8764075_8764247	18	14	9	7	6	19
chr1_8789422_8789844	29	36	22	28	20	80
chr1_8811192_8811354	10	5	4	6	1	18
chr1_8811558_8811882	12	12	14	5	9	28
chr1_8817549_8818221	265	591	432	170	97	539
chr1_8822777_8823153	17	27	27	17	11	29
chr1_8826198_8826332	5	17	9	5	5	10
chr1_8836166_8836395	16	3	3	2	1	11
chr1_8840511_8840629	14	5	4	3	1	2
chr1_8848652_8849155	346	656	506	187	114	632
chr1_8854240_8854483	10	10	29	4	2	13
chr1_8858078_8858533	38	65	56	51	20	121
chr1_8859380_8859632	23	42	38	17	11	37
chr1_8862587_8862839	44	61	43	19	10	44
chr1_8869143_8869612	30	55	52	24	12	56
chr1_8873624_8873888	20	41	42	40	16	114
chr1_8877946_8878340	49	89	65	47	33	99
chr1_8878435_8879412	358	713	550	251	164	703
chr1_8884397_8884530	4	5	2	4	1	25
chr1_8890004_8890258	47	74	78	29	16	89
chr1_8890509_8890734	26	40	36	26	16	80
chr1_8896967_8897131	6	11	17	8	2	17
chr1_8903859_8904249	10	20	24	23	15	95
chr1_8906814_8907064	2	3	9	1	2	12
chr1_8907719_8907843	6	15	12	6	2	8
chr1_8913745_8913940	8	7	14	6	3	13
chr1_8918178_8918383	27	55	34	13	7	40
chr1_8933262_8933568	14	10	14	5	4	12
chr1_8937699_8937974	18	34	20	12	10	46
chr1_8941962_8942060	3	7	17	6	2	22
chr1_8943206_8943505	13	11	14	0	7	10
chr1_8943506_8943670	3	12	4	10	2	4
chr1_8949255_8949493	10	15	11	6	4	17
chr1_8949499_8949708	8	4	9	2	0	21
chr1_8956899_8957274	12	20	21	5	2	26
chr1_8963035_8963310	13	31	11	5	7	19
chr1_8964044_8964188	11	16	15	3	10	30
chr1_8979698_8979784	6	7	2	2	2	9
chr1_8986268_8986618	31	34	32	24	13	70
chr1_8988060_8988292	13	44	38	17	11	32
chr1_8988872_8989046	11	5	9	9	2	13
chr1_8989131_8989276	6	5	6	5	2	20
chr1_8999626_8999746	6	6	8	5	2	4
chr1_9005008_9005346	31	91	64	29	20	97
chr1_9010089_9010260	17	27	17	8	8	36
chr1_9014560_9014763	18	23	14	9	3	28
chr1_9026092_9026482	18	10	19	9	4	30
chr1_9031262_9032315	184	298	209	89	39	193
chr1_9038038_9038658	25	27	64	15	4	58
chr1_9038857_9039134	17	23	18	10	6	30
chr1_9039594_9039657	6	3	2	2	2	10
chr1_9039917_9040004	3	10	9	8	1	22
chr1_9057870_9058268	28	15	19	10	8	45
chr1_9058469_9058731	13	33	21	10	8	25
chr1_9065514_9065643	8	6	7	2	5	22
chr1_9067349_9067434	8	14	13	6	4	25
chr1_9069432_9069550	12	19	16	5	6	13
chr1_9071605_9071859	18	11	10	5	5	15
chr1_9077989_9078234	21	14	20	4	6	19
chr1_9078959_9079085	6	5	11	7	1	6
chr1_9084591_9084698	14	6	8	1	1	4
chr1_9084804_9085269	93	199	113	61	35	146
chr1_9085468_9085630	9	9	2	7	5	35
chr1_9098609_9098899	19	11	15	6	8	16
chr1_9101484_9101834	64	129	83	35	30	99
chr1_9105129_9105648	37	22	26	10	15	50
chr1_9110095_9110198	21	30	19	7	2	16
chr1_9110679_9111230	65	114	116	47	35	132
chr1_9112258_9112444	20	6	7	5	4	14
chr1_9113340_9113505	22	17	17	10	2	9
chr1_9122054_9122290	18	13	26	11	1	16
chr1_9128175_9129876	189	431	297	183	107	469
chr1_9142326_9142477	28	26	20	8	9	19
chr1_9145213_9145509	26	21	16	14	6	36
chr1_9149815_9150234	96	192	134	66	54	207
chr1_9157118_9157218	7	3	15	6	1	4
chr1_9162532_9163165	52	45	71	31	18	105
chr1_9165273_9165547	21	41	27	7	9	38
chr1_9167886_9168029	15	16	15	1	8	18
chr1_9174001_9174148	8	13	13	1	2	6
chr1_9176287_9176441	4	2	5	1	0	3
chr1_9180350_9180501	6	9	6	8	1	13
chr1_9181217_9181743	51	110	87	59	39	155
chr1_9182056_9183360	154	219	176	131	76	335
chr1_9192599_9193271	84	119	95	38	41	135
chr1_9196304_9196420	4	6	7	7	6	14
chr1_9196569_9196726	12	49	25	12	7	18
chr1_9197492_9197777	10	7	14	9	8	40
chr1_9198561_9199196	123	183	142	65	46	191
chr1_9201418_9201732	22	32	47	21	15	66
chr1_9201830_9201921	7	15	17	3	9	25
chr1_9209325_9209546	6	8	4	3	0	22
chr1_9209633_9209828	5	5	11	1	3	9
chr1_9218021_9218274	5	13	9	2	6	32
chr1_9222832_9223046	6	6	7	6	0	18
chr1_9225183_9225557	15	22	19	6	6	18
chr1_9234307_9235365	205	498	349	150	105	539
chr1_9238262_9238471	14	56	41	23	16	92
chr1_9242510_9242852	37	59	28	30	14	69
chr1_9247604_9247685	11	9	4	2	3	14
chr1_9249671_9250277	111	220	173	73	50	173
chr1_9250548_9250733	14	17	20	14	6	36
chr1_9251648_9251743	22	37	31	16	9	34
chr1_9253775_9254081	80	167	124	50	51	159
chr1_9263662_9263843	14	12	15	4	2	15
chr1_9267088_9267398	87	142	109	28	32	115
chr1_9269284_9270797	208	365	341	103	64	238
chr1_9280461_9280829	28	35	38	22	12	83
chr1_9281917_9282175	15	18	29	13	8	39
chr1_9290639_9290733	11	21	11	1	3	18
chr1_9291954_9292059	9	10	14	5	6	12
chr1_9292151_9292320	13	14	9	7	3	19
chr1_9292438_9293094	67	110	80	48	25	120
chr1_9293661_9293848	21	23	9	16	4	20
chr1_9294960_9295202	23	21	25	12	6	43
chr1_9300244_9300527	17	13	10	5	8	29
chr1_9303155_9303457	24	39	34	22	24	99
chr1_9315537_9315727	4	12	8	5	2	16
chr1_9318813_9318886	7	4	12	3	0	4
chr1_9325503_9325644	16	6	9	11	2	17
chr1_9349462_9349563	15	13	14	2	0	27
chr1_9350418_9350622	16	18	8	14	5	24
chr1_9366130_9366292	8	14	9	6	2	14
chr1_9371446_9371938	39	74	59	48	46	167
chr1_9375822_9376123	20	26	26	17	12	67
chr1_9376326_9376624	23	31	20	16	5	58
chr1_9384454_9384697	10	14	11	15	7	18
chr1_9384706_9385247	43	76	81	63	45	156
chr1_9399863_9400998	49	84	107	44	28	125
chr1_9401955_9402147	17	9	8	5	8	32
chr1_9402265_9402568	12	38	24	6	6	24
chr1_9405473_9405610	7	7	12	4	5	23
chr1_9410776_9411113	27	23	32	8	5	53
chr1_9413047_9413668	68	126	91	51	34	173
chr1_9413835_9414135	13	19	17	18	11	50
chr1_9420325_9420541	11	25	22	11	8	25
chr1_9428693_9429307	165	342	288	129	83	339
chr1_9441520_9441752	18	19	23	9	5	15
chr1_9443971_9444364	30	22	26	22	17	61
chr1_9449294_9449745	23	51	39	10	7	35
chr1_9450115_9450216	4	3	3	2	3	2
chr1_9453438_9453685	10	12	22	7	3	18
chr1_9455873_9456198	45	58	61	30	21	63
chr1_9459882_9460190	16	23	22	12	7	24
chr1_9467167_9467438	13	9	14	5	6	21
chr1_9468093_9468171	3	6	3	5	1	13
chr1_9473071_9473552	30	28	29	21	20	85
chr1_9477649_9477950	27	9	18	6	3	22
chr1_9482833_9483235	21	19	10	9	5	28
chr1_9483290_9483537	10	5	14	7	3	20
chr1_9491126_9491354	49	90	64	29	13	98
chr1_9495093_9495686	63	107	87	36	23	86
chr1_9500940_9501056	6	8	7	4	1	11
chr1_9505294_9505672	13	7	10	9	5	21
chr1_9520451_9520659	13	11	14	7	2	14
chr1_9520746_9520952	7	18	6	1	4	9
chr1_9530151_9530241	8	7	8	5	2	14
chr1_9531199_9531450	46	78	57	30	24	71
chr1_9539179_9540331	323	838	528	322	187	869
chr1_9546769_9547183	22	27	28	11	8	59
chr1_9548869_9549280	13	17	22	5	3	21
chr1_9558130_9558567	19	14	39	15	10	37
chr1_9558616_9559432	44	64	66	28	15	96
chr1_9573659_9573901	26	35	27	6	3	13
chr1_9576501_9576643	15	18	22	5	5	22
chr1_9579877_9579997	18	4	4	3	3	4
chr1_9583459_9583664	49	144	109	31	19	88
chr1_9588367_9589044	155	431	281	137	80	431
chr1_9589279_9589680	47	92	83	47	23	126
chr1_9592356_9592483	31	32	41	19	9	56
chr1_9593476_9593883	83	118	128	41	34	152
chr1_9596414_9596645	32	42	45	18	9	42
chr1_9602104_9602359	18	18	29	14	2	24
chr1_9612491_9612742	12	16	20	6	2	25
chr1_9612942_9613537	44	27	35	17	8	64
chr1_9615464_9615815	24	58	52	21	13	73
chr1_9617981_9618121	9	20	10	9	2	18
chr1_9619527_9619625	10	13	3	4	3	6
chr1_9627031_9627441	132	284	187	99	42	289
chr1_9629978_9630111	16	7	17	4	5	13
chr1_9630290_9630728	22	31	36	12	6	32
chr1_9651712_9652504	134	345	212	89	48	242
chr1_9659474_9659816	10	9	7	25	8	60
chr1_9664289_9664511	10	19	3	1	0	12
chr1_9664872_9665025	8	8	2	4	2	10
chr1_9671471_9671618	6	6	4	0	3	10
chr1_9671678_9671792	5	2	5	0	4	7
chr1_9676425_9676666	12	13	8	6	4	25
chr1_9676877_9677284	36	50	47	28	14	70
chr1_9687363_9688042	59	117	99	45	34	135
chr1_9689105_9690173	146	341	227	95	69	324
chr1_9700351_9700605	8	15	12	8	3	25
chr1_9702343_9702659	17	53	48	24	12	54
chr1_9715659_9715807	7	13	15	7	5	24
chr1_9719145_9719440	35	30	26	32	13	96
chr1_9721599_9722051	44	56	53	26	14	83
chr1_9722246_9722303	2	6	4	3	1	6
chr1_9724886_9725294	48	81	75	26	16	93
chr1_9730447_9730527	10	5	7	4	2	8
chr1_9733365_9733545	4	9	8	10	4	16
chr1_9738088_9738535	13	14	18	11	3	40
chr1_9744274_9744486	7	4	13	6	0	16
chr1_9749547_9749776	12	4	11	4	4	12
chr1_9753157_9753543	29	36	45	20	12	50
chr1_9755538_9755947	36	81	66	36	17	114
chr1_9759514_9759782	28	39	37	13	13	53
chr1_9766718_9767283	22	20	34	26	23	90
chr1_9786771_9787173	21	22	22	4	3	39
chr1_9792274_9792790	45	94	71	32	18	80
chr1_9796786_9797173	36	57	56	23	17	70
chr1_9804926_9805015	10	11	17	6	10	19
chr1_9808868_9809581	71	125	85	58	31	176
chr1_9822934_9824702	176	369	276	140	79	400
chr1_9825464_9825947	28	59	45	35	24	100
chr1_9835426_9836526	65	80	76	28	20	96
chr1_9843189_9843317	7	12	9	5	5	16
chr1_9843692_9844024	17	21	33	17	2	36
chr1_9852512_9852925	20	23	33	16	10	60
chr1_9859603_9859846	19	14	19	9	7	39
chr1_9861301_9861596	33	25	36	12	4	32
chr1_9867419_9867945	80	148	119	56	19	109
chr1_9869990_9870109	8	8	8	0	2	15
chr1_9874920_9875278	72	130	101	41	29	129
chr1_9876971_9877347	47	82	77	40	23	95
chr1_9882690_9882808	10	31	10	8	3	8
chr1_9884182_9884302	26	23	19	13	5	25
chr1_9886093_9886707	128	197	201	104	63	235
chr1_9890490_9890776	24	31	26	32	27	82
chr1_9900319_9900947	181	320	276	115	73	333
chr1_9901682_9902034	26	59	49	15	12	53
chr1_9904649_9904885	6	17	16	14	6	25
chr1_9910097_9911125	770	1786	1252	548	352	1811
chr1_9921189_9921347	6	5	9	3	4	10
chr1_9922259_9922726	65	118	91	26	32	106
chr1_9942461_9943584	282	508	381	171	115	494
chr1_9950403_9950790	90	229	162	93	46	198
chr1_9960823_9961489	76	93	74	35	27	85
chr1_9972654_9972752	1	2	0	3	0	5
chr1_9977724_9977827	5	2	3	5	1	4
chr1_9978463_9978696	11	6	13	3	4	18
chr1_9985160_9985345	30	50	45	14	5	31
chr1_9989886_9990084	10	7	4	4	3	27
chr1_9993753_9993891	9	9	7	8	6	14
chr1_9997072_9997565	39	56	52	13	20	64
chr1_9997712_9998117	21	30	30	26	11	38
chr1_10015721_10015995	21	45	38	13	9	62
chr1_10019670_10019775	8	3	3	3	4	15
chr1_10031615_10031797	15	39	23	11	14	28
chr1_10032534_10033776	445	1063	725	349	225	795
chr1_10034614_10034728	10	16	18	11	5	36
chr1_10045288_10045491	9	32	20	6	7	27
chr1_10045900_10046612	65	82	83	14	20	87
chr1_10052538_10052639	11	8	7	9	6	19
chr1_10055799_10056035	7	14	8	7	3	33
chr1_10058560_10058829	12	10	11	8	9	23
chr1_10067116_10067258	15	41	42	12	14	40
chr1_10069780_10069840	4	3	4	2	0	6
chr1_10074450_10074638	10	12	11	10	7	38
chr1_10075201_10075599	42	90	44	25	16	51
chr1_10083884_10084306	15	24	26	15	3	28
chr1_10085135_10085219	6	3	4	1	4	6
chr1_10085351_10085444	4	6	4	3	2	10
chr1_10105479_10105779	28	34	37	5	4	16
chr1_10108208_10108697	54	77	90	43	25	84
chr1_10111495_10111702	7	2	12	6	5	6
chr1_10123011_10123403	10	4	10	7	1	22
chr1_10133138_10133241	7	5	3	2	0	8
chr1_10152887_10153187	23	21	17	13	3	34
chr1_10155044_10155683	62	99	101	35	38	89
chr1_10165201_10165636	21	34	35	14	7	29
chr1_10174059_10174131	3	2	4	1	3	3
chr1_10179430_10179571	10	6	2	3	1	6
chr1_10186866_10186994	6	7	8	2	0	8
chr1_10193109_10193173	6	3	9	5	0	7
chr1_10204363_10204511	11	13	13	5	2	12
chr1_10209825_10210766	798	1777	1186	573	325	1516
chr1_10210876_10211171	51	100	73	37	18	132
chr1_10211848_10212171	96	185	164	44	33	131
chr1_10218105_10218215	7	20	11	7	1	8
chr1_10225137_10225316	8	4	13	6	2	28
chr1_10225767_10225889	7	11	12	7	7	12
chr1_10228610_10228815	12	24	21	10	10	25
chr1_10253600_10254183	175	391	286	76	67	205
chr1_10283375_10283709	20	23	19	7	4	35
chr1_10286174_10286659	124	231	265	61	46	215
chr1_10289223_10289566	39	67	66	12	9	57
chr1_10304358_10304645	16	19	20	13	5	30
chr1_10338154_10338338	48	104	84	24	23	108
chr1_10338724_10338861	13	26	33	5	0	31
chr1_10339840_10340061	26	95	65	23	12	51
chr1_10341305_10341464	6	11	12	7	3	16
chr1_10360903_10361100	11	19	21	5	2	15
chr1_10361592_10361790	17	22	27	6	6	31
chr1_10365552_10365707	6	10	8	3	3	10
chr1_10372407_10372519	6	5	4	4	2	9
chr1_10374469_10374605	10	10	12	3	3	9
chr1_10377316_10377833	55	110	65	26	20	89
chr1_10378524_10378737	13	11	13	15	7	28
chr1_10385392_10385550	12	19	8	2	1	18
chr1_10385697_10386058	89	112	98	16	18	93
chr1_10387661_10387937	10	23	18	6	8	36
chr1_10398466_10399710	927	1900	1418	566	393	1543
chr1_10411585_10411713	8	9	4	2	2	19
chr1_10415448_10415624	8	10	11	3	2	8
chr1_10419487_10419819	14	20	25	6	7	19
chr1_10422369_10422475	13	12	18	2	1	4
chr1_10428148_10428278	31	92	55	26	13	62
chr1_10430141_10431321	230	476	378	190	104	476
chr1_10438671_10439064	68	102	91	48	33	129
chr1_10449459_10449618	9	20	4	4	1	10
chr1_10450270_10450668	21	21	17	9	5	34
chr1_10456785_10457091	35	74	97	35	17	108
chr1_10459194_10459490	7	14	16	10	13	41
chr1_10461460_10461544	6	10	13	3	0	8
chr1_10472109_10472721	174	424	320	154	89	369
chr1_10474816_10475458	140	324	248	121	85	319
chr1_10494582_10495053	60	120	82	34	24	109
chr1_10495175_10495514	28	57	45	18	13	79
chr1_10496037_10496157	12	14	24	7	2	17
chr1_10507201_10507730	57	88	82	31	23	87
chr1_10508604_10508989	16	29	14	15	9	42
chr1_10510621_10510791	7	11	12	7	3	17
chr1_10514384_10514652	12	44	30	11	6	36
chr1_10518854_10519595	100	176	170	73	28	190
chr1_10528232_10528906	48	74	91	89	44	218
chr1_10530398_10530725	58	94	75	29	26	131
chr1_10530871_10531133	11	18	18	29	4	53
chr1_10539117_10539230	9	29	19	2	1	11
chr1_10539530_10539787	21	37	21	16	9	28
chr1_10546849_10547240	10	24	23	11	4	35
chr1_10550328_10550583	8	15	18	15	1	30
chr1_10555814_10556746	84	121	123	44	47	149
chr1_10573549_10573928	2	6	15	4	1	23
chr1_10591582_10591877	20	20	24	14	16	53
chr1_10597708_10597911	7	15	18	6	1	21
chr1_10599216_10599545	12	7	12	5	2	33
chr1_10599697_10599815	3	0	2	5	3	12
chr1_10606033_10606428	11	15	16	7	7	36
chr1_10612509_10612981	68	115	92	34	16	103
chr1_10616531_10616643	9	7	9	4	7	6
chr1_10618548_10618852	12	9	18	12	6	34
chr1_10628778_10628951	27	39	41	8	13	26
chr1_10629228_10629398	13	13	14	5	3	26
chr1_10631972_10632191	29	74	65	19	13	88
chr1_10634861_10635307	52	87	76	30	17	93
chr1_10640122_10641740	175	249	260	97	58	378
chr1_10646440_10646609	23	52	45	12	12	35
chr1_10649369_10649610	19	35	32	17	10	61
chr1_10651452_10651703	40	87	89	27	18	120
chr1_10656825_10657436	77	125	97	27	26	79
chr1_10663309_10664056	541	1176	1022	337	232	1023
chr1_10668582_10668777	28	45	35	19	15	38
chr1_10670559_10670769	22	34	53	16	5	37
chr1_10671699_10672070	43	103	83	40	21	88
chr1_10676813_10677838	116	178	181	87	31	183
chr1_10679676_10679965	64	97	92	22	20	83
chr1_10681762_10681970	26	52	52	14	9	40
chr1_10682194_10682356	12	64	38	21	9	37
chr1_10682852_10683279	43	104	72	38	21	97
chr1_10685781_10686411	86	136	130	61	47	185
chr1_10687348_10687576	40	40	54	18	6	48
chr1_10692329_10692715	65	125	96	44	29	119
chr1_10693914_10694175	27	64	36	22	15	57
chr1_10694444_10694552	19	49	37	17	10	52
chr1_10694725_10695332	89	211	163	69	44	283
chr1_10700117_10700457	25	29	41	13	9	42
chr1_10704671_10705020	28	48	50	17	20	94
chr1_10705598_10706135	46	38	58	25	12	64
chr1_10706664_10706799	17	34	16	10	4	17
chr1_10714390_10715065	144	295	231	111	78	332
chr1_10715159_10715316	13	11	21	11	7	37
chr1_10715673_10716003	8	5	6	4	3	8
chr1_10716490_10717106	115	170	131	50	50	172
chr1_10717570_10717983	44	74	75	44	36	100
chr1_10720376_10720937	179	303	248	40	34	145
chr1_10721683_10721783	18	34	33	17	4	44
chr1_10724074_10724528	113	255	162	49	34	145
chr1_10725265_10725360	18	42	19	12	7	37
chr1_10731085_10731330	17	23	28	22	13	39
chr1_10733905_10734204	66	106	99	36	22	108
chr1_10735317_10735638	59	167	116	41	33	171
chr1_10737048_10737909	203	362	302	97	63	236
chr1_10739273_10739516	13	15	8	8	6	11
chr1_10745943_10746205	24	29	31	5	8	31
chr1_10746631_10746747	6	5	11	7	0	11
chr1_10750005_10750138	14	13	20	6	2	13
chr1_10753368_10753469	19	35	18	8	2	15
chr1_10755889_10756653	82	120	96	51	34	164
chr1_10767338_10767449	8	18	9	5	4	19
chr1_10773689_10773859	10	25	14	8	6	24
chr1_10774341_10774451	3	18	20	8	6	38
chr1_10774706_10774822	8	19	13	1	2	34
chr1_10776493_10776572	7	15	12	7	2	15
chr1_10781277_10781635	38	30	30	12	5	39
chr1_10785517_10785648	7	29	14	5	4	25
chr1_10786270_10786631	77	123	103	50	27	74
chr1_10788611_10789070	132	243	222	47	33	191
chr1_10793802_10794552	152	315	237	95	76	258
chr1_10794906_10795174	42	82	73	22	16	96
chr1_10795434_10795914	58	92	77	48	31	79
chr1_10796117_10796893	125	284	220	107	70	248
chr1_10803037_10803362	37	73	53	16	18	62
chr1_10804383_10804486	2	10	8	3	1	8
chr1_10804508_10804773	11	18	15	7	3	23
chr1_10809793_10810074	24	42	29	11	5	30
chr1_10819767_10820071	27	27	35	10	8	57
chr1_10820519_10820778	42	83	60	19	18	64
chr1_10824870_10825194	15	13	26	20	13	59
chr1_10829656_10829760	9	8	20	5	5	13
chr1_10835860_10836299	115	193	147	51	25	130
chr1_10841050_10841296	14	9	14	4	5	12
chr1_10852106_10852325	16	31	27	8	8	46
chr1_10856915_10857293	62	96	98	21	24	85
chr1_10857829_10858014	16	35	24	11	5	31
chr1_10862709_10863153	84	100	91	30	24	73
chr1_10866778_10867542	120	312	232	110	50	297
chr1_10868018_10868122	11	23	28	7	8	25
chr1_10880119_10880406	17	6	13	5	11	29
chr1_10888493_10888617	5	12	12	7	3	17
chr1_10889187_10889728	15	24	23	7	3	62
chr1_10889856_10890107	7	15	12	7	1	18
chr1_10890509_10890812	22	7	15	9	7	22
chr1_10890879_10891113	7	10	17	5	3	14
chr1_10896509_10896635	8	7	4	1	5	8
chr1_10897949_10898678	34	54	36	16	12	61
chr1_10910015_10910404	38	70	55	21	19	66
chr1_10910544_10911477	84	98	100	37	22	121
chr1_10916925_10917121	8	4	12	6	2	26
chr1_10918366_10918678	11	15	21	3	11	15
chr1_10928675_10928907	18	1	6	5	0	10
chr1_10937219_10937878	208	329	291	22	11	68
chr1_10942066_10942248	21	57	53	19	7	31
chr1_10944195_10944627	28	55	34	13	16	38
chr1_10947640_10947830	10	12	16	10	3	17
chr1_10952082_10952248	29	28	32	16	4	41
chr1_10960595_10960675	7	3	4	3	1	10
chr1_10960937_10961442	97	155	138	43	25	137
chr1_10962587_10962863	33	54	38	12	16	42
chr1_10973510_10973814	21	24	26	11	7	29
chr1_10975874_10976024	17	14	19	13	13	34
chr1_10979520_10979683	17	19	33	5	6	29
chr1_10980119_10980554	150	281	230	85	55	290
chr1_10988855_10989058	9	9	13	7	2	8
chr1_10990203_10990314	1	12	5	2	4	10
chr1_10997519_10997658	7	3	6	4	1	6
chr1_11012222_11013350	272	553	411	265	159	551
chr1_11018244_11018474	9	8	3	3	5	7
chr1_11031709_11031812	7	2	1	3	1	12
chr1_11037699_11038156	57	164	103	38	31	165
chr1_11044869_11044989	12	10	12	8	2	25
chr1_11045210_11045444	18	19	27	15	5	36
chr1_11047002_11047345	16	21	21	12	8	35
chr1_11052783_11052899	9	8	10	8	3	20
chr1_11053788_11054188	45	43	34	18	13	46
chr1_11054361_11054798	22	31	38	16	5	52
chr1_11054894_11055046	8	13	14	5	2	14
chr1_11059521_11060674	326	875	589	268	191	886
chr1_11076464_11076573	6	8	7	4	4	13
chr1_11076680_11076885	6	9	17	4	4	11
chr1_11099214_11100145	137	261	194	97	60	215
chr1_11133078_11133167	5	9	3	2	0	16
chr1_11134262_11134626	23	34	20	7	7	25
chr1_11139497_11139567	4	2	2	2	0	4
chr1_11144005_11144223	27	44	39	12	9	47
chr1_11152471_11152634	14	12	18	12	9	30
chr1_11157194_11157701	22	30	27	15	7	44
chr1_11158703_11158970	2	7	7	11	12	26
chr1_11176238_11176861	75	101	93	82	60	247
chr1_11178014_11178589	56	131	116	61	28	170
chr1_11187429_11187832	29	48	21	13	9	38
chr1_11188012_11188200	12	11	18	12	6	29
chr1_11188517_11188667	21	29	26	13	9	44
chr1_11189073_11189476	13	37	55	16	7	80
chr1_11194459_11194861	32	17	13	2	3	29
chr1_11241547_11242126	34	76	34	16	18	69
chr1_11247972_11248062	5	3	3	3	1	3
chr1_11252600_11252771	5	5	7	1	2	8
chr1_11262244_11262940	652	1356	994	478	296	1206
chr1_11272785_11273981	285	573	411	194	150	575
chr1_11286370_11286481	8	13	15	4	1	12
chr1_11287038_11287227	5	5	1	2	1	11
chr1_11289105_11289180	6	16	10	6	5	23
chr1_11291118_11291341	7	15	14	5	2	28
chr1_11292574_11293108	72	124	98	58	49	165
chr1_11294555_11294620	7	3	3	3	1	10
chr1_11298813_11299225	26	21	29	13	6	33
chr1_11304105_11304254	11	2	7	6	0	7
chr1_11308017_11308118	4	4	2	3	4	8
chr1_11313440_11313546	7	5	7	1	1	24
chr1_11320212_11320450	23	42	29	10	9	41
chr1_11321806_11321953	12	7	11	5	5	23
chr1_11322129_11322319	13	21	15	6	4	18
chr1_11331522_11331858	16	35	45	11	11	63
chr1_11337612_11337752	21	68	50	14	9	49
chr1_11339976_11340211	17	34	31	25	29	78
chr1_11344128_11344344	8	20	10	4	4	11
chr1_11346011_11346135	11	16	4	2	1	15
chr1_11373513_11373820	11	5	12	6	2	19
chr1_11374031_11374360	10	5	10	7	0	18
chr1_11375296_11375975	34	37	51	29	17	80
chr1_11377244_11377360	9	14	4	2	1	11
chr1_11387385_11387684	46	89	55	44	37	150
chr1_11395108_11395272	5	18	14	9	2	12
chr1_11395774_11396315	25	10	34	11	6	47
chr1_11397362_11397757	22	34	18	12	10	38
chr1_11413342_11413496	7	8	3	3	3	6
chr1_11415149_11415303	4	7	7	3	1	21
chr1_11422918_11423111	8	6	15	11	1	10
chr1_11430302_11430526	10	8	19	2	5	25
chr1_11430768_11430867	4	3	2	0	2	8
chr1_11434120_11434318	12	5	8	13	5	22
chr1_11434447_11434537	6	12	10	3	2	13
chr1_11434977_11435080	11	10	5	3	2	13
chr1_11440479_11440706	10	16	7	5	5	19
chr1_11444724_11444930	18	8	14	5	2	16
chr1_11451073_11451164	9	2	8	3	5	17
chr1_11458782_11459054	16	33	32	10	3	36
chr1_11462403_11462830	23	16	18	17	5	48
chr1_11463192_11463449	12	18	14	7	4	33
chr1_11473741_11473869	15	26	31	16	11	37
chr1_11478732_11479456	96	188	113	74	33	187
chr1_11480067_11480394	43	77	54	28	16	89
chr1_11484064_11484576	42	77	53	30	17	77
chr1_11499796_11500174	10	11	11	10	9	26
chr1_11500235_11500318	9	9	8	3	3	19
chr1_11522523_11522927	31	26	46	10	6	57
chr1_11528794_11528873	13	7	14	11	1	12
chr1_11539988_11540097	12	5	10	6	2	24
chr1_11540519_11540673	8	14	12	2	2	11
chr1_11550696_11550936	28	50	44	27	17	56
chr1_11563555_11564083	41	72	52	34	30	138
chr1_11587531_11587626	5	2	1	3	2	18
chr1_11594276_11594578	14	19	17	13	9	35
chr1_11610704_11611038	7	14	22	12	6	26
chr1_11622267_11622510	12	15	11	9	7	32
chr1_11629534_11629732	10	10	9	12	12	8
chr1_11630045_11630320	13	18	14	6	3	22
chr1_11635897_11636124	35	87	48	32	23	101
chr1_11642497_11642667	35	77	49	26	16	67
chr1_11645814_11646074	58	90	94	33	15	93
chr1_11647793_11647980	15	12	11	5	1	24
[truncated: 292,787+ more rows]

## Sheet: ATAC_deseq2_results
atac_peak	baseMean	log2FoldChange	lfcSE	stat	pvalue	padj
chr14_23376493_23379689	1642.95	2.45929	0.1605	15.3227	5.4e-53	6.65e-48
chr7_5518725_5519829	348.28	3.01177	0.210511	14.307	1.98e-46	1.22e-41
chr12_52059607_52060851	303.542	2.97505	0.219443	13.5573	7.18e-42	2.95e-37
chr15_34789215_34790556	599.138	2.34076	0.181417	12.9027	4.35e-38	1.34e-33
chr7_5520965_5521500	245.706	2.99518	0.233894	12.8057	1.52e-37	3.76e-33
chr7_5522894_5524539	883.159	2.05262	0.188023	10.9169	9.58e-28	1.97e-23
chr1_16009732_16010276	180.095	2.90567	0.277101	10.486	1e-25	1.77e-21
chr14_23379863_23380586	316.386	2.09418	0.200124	10.4644	1.26e-25	1.94e-21
chr7_107593127_107593474	134.032	2.87844	0.277523	10.3719	3.33e-25	4.56e-21
chr11_65506555_65508133	1562.4	1.61059	0.156956	10.2614	1.05e-24	1.3e-20
chr1_10937219_10937878	124.029	2.76811	0.282078	9.81328	9.87e-23	1.11e-18
chr1_25909017_25909499	161.052	2.43366	0.251645	9.67098	4.01e-22	4.12e-18
chr13_38590863_38591451	122.327	2.63253	0.276683	9.51461	1.82e-21	1.73e-17
chr1_203309716_203310547	169.364	2.37624	0.251905	9.43305	3.98e-21	3.51e-17
chr14_23408047_23408795	270.993	2.11315	0.224619	9.40771	5.07e-21	4.17e-17
chr12_52053622_52054365	137.269	2.4132	0.261617	9.22419	2.86e-20	2.2e-16
chr14_23375417_23375935	173.633	2.1285	0.237514	8.96155	3.2e-19	2.32e-15
chr5_138469214_138470725	1949.78	1.38932	0.155896	8.91183	5.02e-19	3.44e-15
chr14_23393873_23394513	94.9529	2.68832	0.304157	8.83859	9.69e-19	6.29e-15
chr5_79744135_79744662	108.483	-2.41483	0.273535	-8.82824	1.06e-18	6.56e-15
chr7_10870761_10871399	55.7502	3.8988	0.456245	8.54542	1.28e-17	7.52e-14
chr7_5520434_5520580	72.6043	3.03961	0.356713	8.52116	1.58e-17	8.86e-14
chr1_58779808_58780575	434.12	1.73456	0.206713	8.39117	4.81e-17	2.58e-13
chr11_96798433_96798809	87.0737	2.58384	0.312189	8.27654	1.27e-16	6.52e-13
chr10_88952600_88953278	248.684	1.70694	0.206477	8.26698	1.37e-16	6.78e-13
chr10_18551423_18551966	217.426	2.16586	0.265332	8.16284	3.27e-16	1.55e-12
chr16_69166285_69166853	111.753	2.17699	0.274031	7.94432	1.95e-15	8.92e-12
chr10_11224791_11225441	370.65	1.50934	0.191781	7.87012	3.54e-15	1.54e-11
chr14_23387970_23389276	190.591	1.86935	0.237739	7.863	3.75e-15	1.54e-11
chr8_100384561_100385349	180.38	1.79227	0.227903	7.86419	3.71e-15	1.54e-11
chr8_61075056_61075850	89.441	2.53903	0.32471	7.81939	5.31e-15	2.11e-11
chr12_52056074_52056528	103.959	2.26767	0.290267	7.81235	5.61e-15	2.16e-11
chr10_76050914_76051523	91.89	2.44915	0.314872	7.77825	7.35e-15	2.75e-11
chr14_75282235_75283747	768.29	1.30344	0.169066	7.70966	1.26e-14	4.58e-11
chr17_81508012_81509257	246.925	1.62885	0.211528	7.70041	1.36e-14	4.78e-11
chr1_111748394_111749249	188.471	1.79648	0.235867	7.6165	2.61e-14	8.93e-11
chr3_185656233_185656792	86.0422	-2.17776	0.287837	-7.56592	3.85e-14	1.28e-10
chr11_79236389_79237032	123.943	2.12195	0.28118	7.54661	4.47e-14	1.42e-10
chr5_159514420_159514902	178.359	1.71194	0.226872	7.54581	4.49e-14	1.42e-10
chr1_89928522_89928916	60.3072	2.81718	0.375937	7.49376	6.69e-14	2.06e-10
chr2_15169617_15170179	59.3931	-2.54436	0.339717	-7.48962	6.91e-14	2.08e-10
chr1_111364664_111365010	82.4235	2.51383	0.336384	7.47312	7.83e-14	2.3e-10
chr16_65283221_65283713	71.9729	2.7012	0.363135	7.43856	1.02e-13	2.92e-10
chr2_18741764_18743277	221.471	1.69515	0.227988	7.43529	1.04e-13	2.92e-10
chr11_121280708_121281684	101.161	2.07246	0.280373	7.3918	1.45e-13	3.93e-10
chr4_52202288_52202677	88.7425	2.344	0.317175	7.39024	1.47e-13	3.93e-10
chr4_182212201_182212870	180.847	1.95042	0.264152	7.38368	1.54e-13	4.04e-10
chr9_4020147_4021116	163.841	1.75427	0.238114	7.36733	1.74e-13	4.47e-10
chr7_5524741_5527087	1354.48	1.13615	0.155925	7.28647	3.18e-13	8.01e-10
chr13_23570066_23570705	164.369	1.69811	0.233571	7.27021	3.59e-13	8.85e-10
chr4_119370419_119370785	62.0364	2.73993	0.378193	7.2448	4.33e-13	1.05e-09
chr11_12287025_12287355	79.6233	-2.26811	0.31338	-7.23756	4.57e-13	1.08e-09
chr1_224213496_224213924	96.7361	2.18406	0.303478	7.19676	6.17e-13	1.43e-09
chr16_15829419_15829848	101.503	2.1806	0.305117	7.14676	8.88e-13	1.99e-09
chr19_50496252_50497070	393.055	1.34283	0.187832	7.14909	8.74e-13	1.99e-09
chr13_110014745_110015078	74.4304	2.45154	0.344451	7.11725	1.1e-12	2.42e-09
chr2_168272223_168272583	54.1425	2.72238	0.384767	7.07539	1.49e-12	3.22e-09
chr12_52052695_52053050	89.0977	2.14624	0.303627	7.0687	1.56e-12	3.27e-09
chr9_116233987_116234501	91.8761	-2.07996	0.294223	-7.06935	1.56e-12	3.27e-09
chr10_34743681_34744149	242.608	1.47456	0.209429	7.04088	1.91e-12	3.93e-09
chr2_101434939_101435388	52.8149	2.77499	0.395321	7.01958	2.23e-12	4.5e-09
chr22_27461433_27461855	108.983	-1.7961	0.257583	-6.9729	3.1e-12	6.08e-09
chr7_152989883_152990395	104.5	1.97023	0.282528	6.97356	3.09e-12	6.08e-09
chr13_81927462_81927974	51.8156	2.9319	0.421832	6.95038	3.64e-12	6.91e-09
chr14_23391346_23391796	75.9933	2.20303	0.316922	6.95132	3.62e-12	6.91e-09
chr1_16011807_16013696	1238.41	1.16624	0.168182	6.93439	4.08e-12	7.51e-09
chr9_35681418_35682839	201.978	1.50774	0.217389	6.93566	4.04e-12	7.51e-09
chr19_19276384_19276792	55.0907	-2.46545	0.356092	-6.92363	4.4e-12	7.67e-09
chr2_134676907_134677348	92.9723	2.02068	0.291839	6.92393	4.39e-12	7.67e-09
chr3_194621129_194621696	140.685	1.70444	0.246195	6.92314	4.42e-12	7.67e-09
chr4_108359957_108360470	65.5192	2.39839	0.346413	6.9235	4.41e-12	7.67e-09
chr20_41177658_41177956	59.9446	-2.3368	0.338212	-6.90927	4.87e-12	8.34e-09
chr8_116576694_116577336	51.3771	2.68139	0.388913	6.89459	5.4e-12	9.13e-09
chr14_23398940_23399393	80.6931	2.10618	0.306326	6.87562	6.17e-12	1.03e-08
chr6_101776836_101777423	89.1309	2.12141	0.308728	6.87145	6.36e-12	1.05e-08
chr3_66410660_66411108	113.92	1.92972	0.281888	6.8457	7.61e-12	1.23e-08
chr17_75775774_75776338	89.2757	2.01403	0.294812	6.83157	8.4e-12	1.35e-08
chr3_47557107_47557622	138.934	1.87549	0.27469	6.82766	8.63e-12	1.36e-08
chr1_74470883_74471339	148.659	1.63656	0.240158	6.81452	9.46e-12	1.48e-08
chr7_17849596_17849876	41.4604	3.058	0.449273	6.80656	1e-11	1.54e-08
chr6_55260134_55260638	51.1086	2.80799	0.415472	6.75855	1.39e-11	2.12e-08
chr12_64650867_64651185	100.1	1.8812	0.278467	6.75558	1.42e-11	2.14e-08
chr14_23400453_23400931	87.2457	1.98565	0.293998	6.75395	1.44e-11	2.14e-08
chr7_76304890_76305766	396.922	1.36338	0.201925	6.7519	1.46e-11	2.14e-08
chr2_226631631_226632053	48.4618	2.70076	0.400454	6.74425	1.54e-11	2.23e-08
chr14_66045454_66046083	160.913	-1.52437	0.226306	-6.73587	1.63e-11	2.31e-08
chr3_123071640_123073128	135.849	1.71266	0.254215	6.73704	1.62e-11	2.31e-08
chr20_62557558_62559401	420.026	1.22079	0.182124	6.70305	2.04e-11	2.86e-08
chr12_101925326_101925665	69.0892	-2.06953	0.309311	-6.69077	2.22e-11	3.08e-08
chr6_35168480_35168989	82.1416	2.29761	0.344104	6.67709	2.44e-11	3.3e-08
chr6_125340290_125341179	141.624	1.78844	0.267896	6.67587	2.46e-11	3.3e-08
chr7_35450555_35451174	101.52	1.91682	0.28714	6.67555	2.46e-11	3.3e-08
chr1_16009113_16009466	216.234	1.48809	0.225701	6.59321	4.3e-11	5.71e-08
chr20_51492513_51493186	275.345	1.30206	0.198233	6.56834	5.09e-11	6.68e-08
chr3_32137528_32138396	82.5422	1.95881	0.298602	6.55995	5.38e-11	6.99e-08
chr8_107747144_107747618	56.1031	2.3806	0.363444	6.55012	5.75e-11	7.39e-08
chr1_59994336_59995176	56.9158	-2.17694	0.333074	-6.53591	6.32e-11	8.04e-08
chr10_110512168_110513128	109.494	1.75612	0.270118	6.5013	7.96e-11	1e-07
chr12_27193822_27194279	277.491	1.38904	0.214358	6.48003	9.17e-11	1.14e-07
chr11_11171081_11171734	177.292	1.50481	0.232302	6.47783	9.3e-11	1.15e-07
chr14_73761747_73762293	136.405	1.66336	0.257072	6.47039	9.78e-11	1.19e-07
chr3_62607080_62608081	88.1112	1.92074	0.297001	6.46711	9.99e-11	1.21e-07
chr1_168513142_168513844	108.81	1.76107	0.272723	6.45735	1.07e-10	1.28e-07
chr10_114856687_114857033	33.4315	-2.90431	0.450548	-6.44617	1.15e-10	1.36e-07
chr19_50494688_50495707	240.648	1.39507	0.216777	6.43548	1.23e-10	1.45e-07
chr11_114294877_114295379	44.2059	-2.64819	0.412103	-6.42605	1.31e-10	1.48e-07
chr14_23390405_23390738	60.1599	2.27558	0.353958	6.42896	1.28e-10	1.48e-07
chr15_25830836_25831626	67.6671	-1.98854	0.309396	-6.42717	1.3e-10	1.48e-07
chr17_5516121_5516791	60.9055	-2.08855	0.324968	-6.42694	1.3e-10	1.48e-07
chr1_42962642_42962999	135.067	1.60759	0.250648	6.41372	1.42e-10	1.59e-07
chr12_83763372_83763900	73.7077	2.01484	0.315847	6.37916	1.78e-10	1.98e-07
chr13_42990758_42991184	90.2343	1.83959	0.288536	6.3756	1.82e-10	2.01e-07
chr4_176270667_176271011	35.2192	-2.7729	0.435125	-6.37264	1.86e-10	2.03e-07
chr19_38711616_38712114	140.224	1.55381	0.244134	6.36457	1.96e-10	2.12e-07
chr6_35363251_35363729	256.505	1.3706	0.215617	6.35667	2.06e-10	2.21e-07
chr1_156664515_156665396	299.333	1.24477	0.196298	6.34124	2.28e-10	2.42e-07
chr5_172897698_172898138	69.6464	-1.93917	0.308228	-6.29136	3.15e-10	3.32e-07
chr2_231318400_231319010	114.405	1.677	0.26662	6.28983	3.18e-10	3.32e-07
chr1_212305994_212306322	62.1094	2.29976	0.366346	6.27755	3.44e-10	3.55e-07
chr14_53509227_53509800	78.6274	1.90178	0.302971	6.2771	3.45e-10	3.55e-07
chr5_176530989_176531598	116.095	1.66051	0.264686	6.2735	3.53e-10	3.6e-07
chr5_129656904_129657286	46.116	2.51404	0.402533	6.24555	4.22e-10	4.27e-07
chr20_13146972_13147564	104.158	1.69869	0.272924	6.22404	4.85e-10	4.82e-07
chr3_76565817_76566426	60.2636	2.14567	0.344743	6.22395	4.85e-10	4.82e-07
chr1_176602262_176602659	63.7972	2.22676	0.357885	6.22201	4.91e-10	4.84e-07
chr22_29004510_29005310	239.863	1.29462	0.208457	6.21048	5.28e-10	5.17e-07
chr17_70307475_70307777	56.1606	-2.0712	0.333741	-6.20602	5.43e-10	5.28e-07
chr14_31263509_31263978	60.5505	-2.14445	0.346214	-6.19401	5.87e-10	5.65e-07
chr14_54219902_54220712	99.9007	1.74138	0.2822	6.17073	6.8e-10	6.5e-07
chr11_117220682_117221436	92.2518	1.7426	0.282551	6.16739	6.94e-10	6.59e-07
chr12_52058534_52058840	53.5324	2.29139	0.37166	6.16529	7.04e-10	6.62e-07
chr10_71766696_71767413	112.562	-1.5773	0.256181	-6.15695	7.42e-10	6.93e-07
chr11_8709009_8709629	84.8026	1.79292	0.291991	6.14034	8.23e-10	7.64e-07
chr9_131490440_131491302	101.917	1.65801	0.270396	6.13177	8.69e-10	8e-07
chr5_58787891_58788352	47.7239	2.64168	0.431119	6.12748	8.93e-10	8.16e-07
chr12_66969813_66970245	40.8248	2.6332	0.430002	6.1237	9.14e-10	8.29e-07
chr1_21490733_21491277	136.578	-1.49385	0.244384	-6.11271	9.8e-10	8.82e-07
chr14_23396620_23397118	69.6056	2.00799	0.328815	6.10673	1.02e-09	9.09e-07
chr14_23386493_23386786	46.7371	2.48878	0.40848	6.09278	1.11e-09	9.85e-07
chr1_111559715_111560446	173.622	1.39731	0.230304	6.06724	1.3e-09	1.15e-06
chr20_10282950_10283455	27.3399	-3.03283	0.500102	-6.06441	1.32e-09	1.16e-06
chr3_123089556_123090443	91.4617	1.73383	0.286331	6.05532	1.4e-09	1.21e-06
chrX_154400964_154401675	118.06	1.5505	0.256009	6.05642	1.39e-09	1.21e-06
chr10_92757015_92757594	69.3894	2.04338	0.337619	6.05232	1.43e-09	1.22e-06
chr14_23387358_23387805	71.7103	2.03285	0.335963	6.0508	1.44e-09	1.23e-06
chr7_138257481_138258078	160.378	1.47687	0.24425	6.04654	1.48e-09	1.25e-06
chr16_4231372_4231725	77.3679	1.82509	0.302934	6.02472	1.69e-09	1.42e-06
chr15_63053259_63053575	159.128	1.4132	0.234803	6.01864	1.76e-09	1.46e-06
chr20_37984009_37984554	129.651	1.4834	0.246462	6.01878	1.76e-09	1.46e-06
chr3_150255388_150255891	79.5261	1.89572	0.315125	6.01576	1.79e-09	1.47e-06
chr3_119650441_119651261	205.429	1.3133	0.218462	6.01155	1.84e-09	1.5e-06
chr11_107222894_107223611	53.0245	2.18623	0.36403	6.00563	1.91e-09	1.55e-06
chr17_35801528_35802085	229.68	1.3339	0.222302	6.00042	1.97e-09	1.59e-06
chr15_34796885_34797157	134.174	1.46234	0.243766	5.99895	1.99e-09	1.59e-06
chr4_84499192_84499643	118.533	1.53695	0.256502	5.99197	2.07e-09	1.65e-06
chr5_82357028_82357862	109.831	1.61985	0.27066	5.98479	2.17e-09	1.71e-06
chr6_3612227_3612667	36.2053	-2.49312	0.416678	-5.98333	2.19e-09	1.72e-06
chr7_64959252_64959918	75.3522	1.91897	0.321022	5.9777	2.26e-09	1.77e-06
chr9_112041551_112042214	129.942	-1.50875	0.252537	-5.97437	2.31e-09	1.79e-06
chr13_23509770_23510207	85.9091	1.94142	0.325205	5.96982	2.38e-09	1.83e-06
chr11_43830775_43831352	55.1644	-2.14338	0.359202	-5.96704	2.42e-09	1.85e-06
chr13_84192126_84192478	40.1443	-2.53446	0.425006	-5.96335	2.47e-09	1.88e-06
chr1_109197331_109198599	116.055	-1.50573	0.252966	-5.9523	2.64e-09	2e-06
chr15_63054144_63054697	259.254	1.18961	0.200037	5.94696	2.73e-09	2.04e-06
chr4_91589944_91590636	74.6743	2.04203	0.343323	5.94783	2.72e-09	2.04e-06
chr15_32855873_32856274	63.3451	-1.98061	0.333222	-5.94382	2.78e-09	2.07e-06
chr20_1946872_1947654	178.975	1.36316	0.229468	5.94054	2.84e-09	2.1e-06
chr2_110119811_110120854	125.631	1.48119	0.249825	5.9289	3.05e-09	2.24e-06
chr15_70494879_70495683	89.6049	-1.65607	0.279613	-5.92274	3.17e-09	2.31e-06
chr22_27531775_27532370	71.5629	-1.87069	0.315895	-5.92188	3.18e-09	2.31e-06
chr20_57445356_57445819	319.745	1.13609	0.191889	5.92054	3.21e-09	2.31e-06
chr9_121607699_121608439	270.965	1.23854	0.209361	5.91583	3.3e-09	2.37e-06
chr17_81506871_81507336	59.7834	2.08418	0.353042	5.90349	3.56e-09	2.54e-06
chr17_56540807_56541165	96.649	1.61992	0.274675	5.89758	3.69e-09	2.61e-06
chr11_41659850_41660469	146.476	1.4061	0.238744	5.88957	3.87e-09	2.73e-06
chr1_16013978_16014194	114.683	1.57997	0.268455	5.88542	3.97e-09	2.78e-06
chr11_131033124_131033691	126.505	-1.65222	0.280884	-5.88224	4.05e-09	2.82e-06
chr7_17988237_17988646	76.408	1.79366	0.30498	5.88121	4.07e-09	2.82e-06
chr10_132627788_132628449	247.669	1.20166	0.204522	5.87545	4.22e-09	2.91e-06
chr10_76175656_76176454	72.6076	2.05764	0.35083	5.86506	4.49e-09	3.08e-06
chr5_172930929_172931468	35.4974	-2.43378	0.416367	-5.84526	5.06e-09	3.45e-06
chr12_3252234_3252830	358.248	1.09738	0.188084	5.83455	5.39e-09	3.65e-06
chr5_149416991_149417484	94.5329	1.64982	0.283306	5.82345	5.76e-09	3.88e-06
chr6_12709153_12709423	35.159	-2.50333	0.430034	-5.82124	5.84e-09	3.92e-06
chr6_14622078_14622777	38.5366	2.59521	0.446413	5.81346	6.12e-09	4.08e-06
chr8_38401562_38401863	30.8377	-2.6808	0.461487	-5.80905	6.28e-09	4.17e-06
chr6_72954769_72955118	38.4125	2.59686	0.447502	5.80301	6.51e-09	4.3e-06
chr1_168498116_168498742	112.186	1.50361	0.259493	5.79441	6.86e-09	4.5e-06
chr1_10720376_10720937	130.828	1.42272	0.245625	5.79225	6.95e-09	4.53e-06
chr19_51726033_51726436	42.6713	-2.23287	0.385599	-5.79066	7.01e-09	4.55e-06
chr22_35620633_35621260	256.754	1.20722	0.208562	5.78828	7.11e-09	4.59e-06
chr1_201486029_201486621	278.221	1.14989	0.198704	5.78697	7.17e-09	4.6e-06
chr1_15139774_15140306	246.454	1.18797	0.206041	5.7657	8.13e-09	5.2e-06
chr3_52444849_52447940	984.539	0.948985	0.164631	5.76431	8.2e-09	5.21e-06
chr7_134827716_134828276	95.3325	1.60353	0.27823	5.76332	8.25e-09	5.22e-06
chr10_126247438_126247897	43.8161	-2.17292	0.377219	-5.76037	8.39e-09	5.28e-06
chr7_67937632_67938250	98.1438	-1.59271	0.27668	-5.75652	8.59e-09	5.38e-06
chr12_52054444_52054625	44.0752	2.31608	0.402482	5.7545	8.69e-09	5.41e-06
chr4_145735175_145735609	129.297	-1.45044	0.252462	-5.7452	9.18e-09	5.68e-06
chr5_124401929_124402562	134.17	1.40649	0.244833	5.74471	9.21e-09	5.68e-06
chr11_47149010_47149586	72.2034	1.983	0.345474	5.73994	9.47e-09	5.76e-06
chr13_110359989_110360448	290.186	1.18104	0.205754	5.74004	9.47e-09	5.76e-06
chr19_45474659_45475680	415.384	1.16745	0.203416	5.73922	9.51e-09	5.76e-06
chr4_2665811_2666078	50.8692	-2.16413	0.377092	-5.73901	9.52e-09	5.76e-06
chr15_31229177_31229581	62.9219	1.98616	0.347168	5.72104	1.06e-08	6.37e-06
chr21_45154673_45155237	188.529	1.26203	0.22083	5.71495	1.1e-08	6.57e-06
chr9_87279332_87279717	33.4033	-2.4755	0.433456	-5.71108	1.12e-08	6.69e-06
chr18_48610455_48610829	70.793	-1.70874	0.299527	-5.7048	1.16e-08	6.91e-06
chr3_46863212_46863850	99.2812	-1.59445	0.279594	-5.70273	1.18e-08	6.92e-06
chr4_173805951_173806212	31.2217	2.90879	0.510029	5.70318	1.18e-08	6.92e-06
chr10_69899823_69900433	94.3512	-1.57864	0.277256	-5.69382	1.24e-08	7.26e-06
chr17_68517690_68518684	172.866	1.27678	0.224372	5.69047	1.27e-08	7.34e-06
chr20_25229958_25230591	150.817	1.37486	0.241579	5.69114	1.26e-08	7.34e-06
chr1_219757739_219758337	66.2914	1.87116	0.328912	5.68893	1.28e-08	7.37e-06
chr22_30206758_30207328	88.6552	-1.55864	0.274025	-5.68795	1.29e-08	7.38e-06
chr13_31209002_31209723	111.38	1.48548	0.261232	5.68645	1.3e-08	7.41e-06
chr9_137918616_137919482	250.892	-1.27877	0.224949	-5.68471	1.31e-08	7.45e-06
chr12_69405543_69405826	35.2996	-2.37413	0.418091	-5.67851	1.36e-08	7.69e-06
chrX_115503142_115503468	53.5187	2.10222	0.371248	5.66258	1.49e-08	8.4e-06
chr11_128467571_128468113	74.4572	-1.68505	0.298223	-5.6503	1.6e-08	8.98e-06
chr20_37990592_37991280	237.873	1.17472	0.207979	5.64828	1.62e-08	9.04e-06
chr3_159340989_159341635	42.5733	2.2788	0.403579	5.64647	1.64e-08	9.1e-06
chr6_166466024_166466689	70.1996	-1.71722	0.304246	-5.64417	1.66e-08	9.18e-06
chr8_115440255_115440552	105.613	1.64152	0.290978	5.6414	1.69e-08	9.29e-06
chr10_44935517_44935939	91.9819	-1.55328	0.275458	-5.63892	1.71e-08	9.38e-06
chr12_109695932_109696442	52.3638	2.03894	0.361643	5.63797	1.72e-08	9.39e-06
chr2_60054888_60055362	58.0199	-1.96941	0.3495	-5.63493	1.75e-08	9.43e-06
chr2_131807846_131808214	65.3667	1.87816	0.333301	5.63504	1.75e-08	9.43e-06
chr4_122548387_122548965	56.7156	1.95655	0.347202	5.63519	1.75e-08	9.43e-06
chr12_52029737_52030111	240.466	1.19113	0.211419	5.63399	1.76e-08	9.44e-06
chr4_67465057_67466049	164.063	1.32554	0.235358	5.63202	1.78e-08	9.51e-06
chr1_206457409_206458137	77.5897	1.78819	0.317581	5.63065	1.8e-08	9.54e-06
chr12_101536074_101536493	33.6347	2.69768	0.47934	5.6279	1.82e-08	9.66e-06
chr14_93976548_93976952	164.431	1.29025	0.229435	5.62359	1.87e-08	9.86e-06
chr15_52143960_52144319	40.0851	-2.30333	0.410195	-5.61521	1.96e-08	1.03e-05
chr12_69459310_69459834	61.9528	1.91688	0.341462	5.61376	1.98e-08	1.03e-05
chr20_15854822_15855334	39.0088	-2.19363	0.390933	-5.61128	2.01e-08	1.05e-05
chr4_108168574_108169225	210.844	1.32187	0.235663	5.60918	2.03e-08	1.05e-05
chr12_4116555_4117100	90.244	-1.51895	0.270868	-5.60772	2.05e-08	1.06e-05
chr8_66369587_66369873	53.4471	1.99595	0.355959	5.60725	2.06e-08	1.06e-05
chr14_23401342_23401740	77.0586	1.70441	0.304747	5.59284	2.23e-08	1.14e-05
chr7_6443507_6443960	37.057	-2.33529	0.417522	-5.59321	2.23e-08	1.14e-05
chr13_35285648_35286076	44.9727	2.40582	0.430793	5.58464	2.34e-08	1.19e-05
chr1_111535182_111536146	64.5404	1.89867	0.34038	5.57809	2.43e-08	1.23e-05
chr13_20997555_20998134	54.4776	-1.86588	0.334708	-5.57465	2.48e-08	1.25e-05
chr7_109938878_109939516	115.819	1.46673	0.263171	5.57331	2.5e-08	1.25e-05
chr10_30182762_30183287	73.1917	-1.79942	0.323131	-5.56869	2.57e-08	1.28e-05
chr5_154603914_154604563	227.105	1.32491	0.237956	5.56786	2.58e-08	1.28e-05
chr14_55780105_55780684	89.0014	-1.53116	0.2752	-5.56379	2.64e-08	1.3e-05
chr3_172877027_172877431	42.6595	2.22588	0.40003	5.5643	2.63e-08	1.3e-05
chr14_52954620_52954956	178.255	1.24244	0.223455	5.56016	2.7e-08	1.32e-05
chr20_44692912_44693354	68.1746	-1.68609	0.303524	-5.55505	2.78e-08	1.36e-05
chr22_25754596_25755119	282.126	1.12474	0.202726	5.54806	2.89e-08	1.4e-05
chr6_170403531_170403865	62.0223	1.87076	0.337199	5.54794	2.89e-08	1.4e-05
chr11_102603038_102603565	163.797	1.26697	0.228838	5.53653	3.09e-08	1.49e-05
chr11_117885711_117886286	195.41	1.27524	0.230308	5.53712	3.07e-08	1.49e-05
chr11_129143325_129143672	69.2566	-1.80403	0.326007	-5.53371	3.14e-08	1.5e-05
chr3_154795593_154795994	60.2339	-1.80321	0.325999	-5.53134	3.18e-08	1.52e-05
chr12_124236651_124237001	24.4426	-2.87953	0.520745	-5.52963	3.21e-08	1.53e-05
chr9_137987340_137987710	62.329	-1.74653	0.316074	-5.5257	3.28e-08	1.56e-05
chr2_190576603_190577060	132.598	1.46255	0.264774	5.52379	3.32e-08	1.57e-05
chr12_2640650_2641169	76.4314	-1.60422	0.290714	-5.51819	3.43e-08	1.61e-05
chr12_52057394_52057611	48.5011	2.15859	0.391179	5.51816	3.43e-08	1.61e-05
chr2_63591098_63591496	143.763	1.31828	0.239193	5.51137	3.56e-08	1.66e-05
chrX_5051773_5052454	124.983	1.38866	0.252011	5.51033	3.58e-08	1.67e-05
chr2_176621495_176622469	203.815	1.18315	0.214872	5.50631	3.66e-08	1.7e-05
chr12_22275789_22276192	61.3082	-1.79424	0.326317	-5.49845	3.83e-08	1.77e-05
chr5_173196015_173196807	107.919	1.45589	0.265019	5.49353	3.94e-08	1.81e-05
chr7_130904060_130904645	59.1404	-1.77884	0.323953	-5.49103	4e-08	1.83e-05
chr15_33911119_33911479	32.6548	2.5816	0.470982	5.48131	4.22e-08	1.93e-05
chr1_23558161_23558632	91.6747	1.70596	0.311332	5.47953	4.26e-08	1.93e-05
chr19_53978157_53978646	140.202	-1.31199	0.239405	-5.48022	4.25e-08	1.93e-05
chr5_14190192_14190751	135.519	-1.3177	0.240508	-5.47884	4.28e-08	1.93e-05
chr6_5214494_5215074	246.843	1.1926	0.217683	5.47863	4.29e-08	1.93e-05
chr12_49183371_49184073	48.3279	2.12399	0.388432	5.46811	4.55e-08	2.04e-05
chr18_41940419_41940978	59.7377	-1.97544	0.361893	-5.45862	4.8e-08	2.14e-05
chr3_112302141_112302471	57.048	1.90093	0.34856	5.45365	4.93e-08	2.2e-05
chr3_115239707_115240155	59.4896	-1.75633	0.322242	-5.45033	5.03e-08	2.23e-05
chr8_25307904_25308491	64.8594	1.7864	0.327773	5.45009	5.03e-08	2.23e-05
chr16_85878918_85879397	72.1685	-1.71761	0.315243	-5.44853	5.08e-08	2.24e-05
chr10_72331858_72332347	242.538	1.1764	0.216072	5.44449	5.2e-08	2.28e-05
chr16_1494339_1495175	251.383	1.11228	0.20464	5.43532	5.47e-08	2.39e-05
chr5_174306290_174306705	46.9958	-1.96026	0.36078	-5.43339	5.53e-08	2.41e-05
chr12_14257616_14258788	173.59	1.22677	0.226081	5.42625	5.76e-08	2.49e-05
chr13_38686460_38688229	441.019	0.98421	0.181395	5.42579	5.77e-08	2.49e-05
chr7_47651414_47651982	38.5988	-2.14774	0.395831	-5.42589	5.77e-08	2.49e-05
chr5_150036479_150036933	138.057	-1.39056	0.256681	-5.41747	6.04e-08	2.6e-05
chr7_13727174_13727543	42.6707	2.25507	0.416372	5.41599	6.1e-08	2.61e-05
chr16_46762973_46763689	239.037	1.11826	0.206681	5.41058	6.28e-08	2.68e-05
chr1_81582698_81583055	44.7838	2.14848	0.397291	5.40781	6.38e-08	2.71e-05
chr16_1509622_1510372	267.977	1.1426	0.211461	5.40334	6.54e-08	2.77e-05
chr11_71945361_71945631	21.0756	-3.08794	0.57165	-5.4018	6.6e-08	2.78e-05
chr9_129352971_129353539	174.287	1.29841	0.240378	5.40154	6.61e-08	2.78e-05
chr15_34791141_34791491	113.26	1.38953	0.257506	5.3961	6.81e-08	2.86e-05
chr19_18733206_18733727	264.567	1.10826	0.205413	5.39528	6.84e-08	2.86e-05
chr9_117293235_117294050	80.431	-1.55401	0.288247	-5.39124	7e-08	2.92e-05
chr14_23385995_23386316	49.728	2.0359	0.377907	5.3873	7.15e-08	2.97e-05
chr13_95256115_95256581	84.7891	-1.51605	0.281483	-5.38592	7.21e-08	2.97e-05
chr9_10251575_10251883	42.7028	2.40852	0.447156	5.3863	7.19e-08	2.97e-05
chr2_164388534_164388927	42.581	-2.06938	0.38435	-5.3841	7.28e-08	2.99e-05
chr11_63805957_63806486	50.3592	-1.85746	0.345141	-5.38174	7.38e-08	3.02e-05
chr3_31815622_31816613	78.3078	1.598	0.297186	5.37711	7.57e-08	3.09e-05
chr9_107274893_107275280	41.1965	-2.18853	0.407064	-5.37638	7.6e-08	3.09e-05
chr14_23396285_23396489	34.1809	2.80403	0.521904	5.37269	7.76e-08	3.13e-05
chr14_75280865_75281712	393.724	1.03416	0.192482	5.37274	7.75e-08	3.13e-05
chr15_38536239_38536737	36.042	-2.22503	0.41408	-5.37343	7.73e-08	3.13e-05
chr2_88077076_88077610	210.157	1.14215	0.21271	5.36953	7.89e-08	3.17e-05
chr7_17275990_17276692	53.7828	-1.79272	0.333978	-5.36777	7.97e-08	3.19e-05
chr5_56259091_56259434	31.5224	-2.32893	0.434119	-5.36473	8.11e-08	3.24e-05
chr11_59960494_59961000	77.0184	1.74917	0.326142	5.36321	8.18e-08	3.25e-05
chr20_1500573_1500886	47.0443	2.0417	0.380791	5.36175	8.24e-08	3.27e-05
chr3_11618962_11619538	54.3071	1.91169	0.356875	5.35674	8.47e-08	3.35e-05
chr18_48529856_48530134	43.4051	-2.16704	0.40513	-5.349	8.84e-08	3.48e-05
chr2_230905259_230906353	123.68	1.36332	0.255002	5.3463	8.98e-08	3.53e-05
chr5_150673947_150674495	191.317	-1.13809	0.213006	-5.34301	9.14e-08	3.58e-05
chr4_150722721_150723638	201.914	1.16062	0.217325	5.34046	9.27e-08	3.62e-05
chr12_69431606_69432239	49.843	1.981	0.371213	5.33656	9.47e-08	3.69e-05
chr14_100696604_100697087	52.4466	1.92088	0.360141	5.3337	9.62e-08	3.73e-05
chr5_66454296_66455212	52.2761	-1.9591	0.367457	-5.33151	9.74e-08	3.77e-05
chr4_48909710_48910013	62.4008	-1.74894	0.328227	-5.32847	9.9e-08	3.82e-05
chr15_62781123_62781442	82.7367	1.54409	0.290042	5.32368	1.02e-07	3.91e-05
chr12_50619094_50619657	158.112	1.24254	0.2337	5.31683	1.06e-07	4.04e-05
chr12_109115842_109116089	63.9682	1.73421	0.326359	5.31382	1.07e-07	4.1e-05
chr19_38664019_38664769	240.19	1.08698	0.204581	5.31321	1.08e-07	4.1e-05
chr1_176601334_176601794	104.379	1.41484	0.266366	5.31162	1.09e-07	4.12e-05
chr5_146283403_146283824	62.667	-1.76079	0.331532	-5.31108	1.09e-07	4.12e-05
chr9_81389465_81390051	41.3188	-2.02845	0.382011	-5.30993	1.1e-07	4.14e-05
chr12_109291317_109292220	118.646	1.35167	0.254951	5.3017	1.15e-07	4.31e-05
chr5_140223393_140224038	237.867	1.14397	0.215952	5.29731	1.18e-07	4.41e-05
chr4_55256715_55257203	165.275	1.22609	0.23163	5.29329	1.2e-07	4.49e-05
chr7_17840852_17841273	47.7803	1.98047	0.374221	5.29226	1.21e-07	4.5e-05
chr10_70578217_70578788	113.578	1.45742	0.275533	5.28944	1.23e-07	4.55e-05
chr6_25088503_25088856	19.2022	-3.14973	0.595563	-5.28866	1.23e-07	4.55e-05
chr9_124078038_124078293	41.8164	-2.02199	0.382285	-5.28921	1.23e-07	4.55e-05
chr11_65915644_65916064	107.806	-1.34341	0.254084	-5.28726	1.24e-07	4.57e-05
chr14_54743389_54744131	95.3676	1.45336	0.275132	5.28242	1.27e-07	4.68e-05
chr4_84337002_84337290	26.109	3.10697	0.588218	5.28201	1.28e-07	4.68e-05
chr5_157370980_157371338	71.2029	1.65769	0.313994	5.27937	1.3e-07	4.73e-05
chr1_51281848_51282252	36.8983	2.46479	0.467079	5.27703	1.31e-07	4.78e-05
chr17_44900935_44901194	55.0873	1.94874	0.369918	5.26805	1.38e-07	5e-05
chr15_63056169_63056459	81.6011	1.53838	0.292141	5.26588	1.4e-07	5.05e-05
chr21_29130221_29130720	57.9208	-1.87737	0.356738	-5.26261	1.42e-07	5.12e-05
chr15_63051333_63051572	138.007	1.25863	0.239198	5.26189	1.43e-07	5.13e-05
chr15_63050111_63050380	102.18	1.40768	0.267551	5.26135	1.43e-07	5.13e-05
chr1_229070143_229070536	75.5954	1.62757	0.309679	5.25569	1.47e-07	5.26e-05
chr20_35305750_35306040	50.7396	-1.86675	0.355182	-5.25576	1.47e-07	5.26e-05
chr5_8828717_8829726	122.732	-1.35987	0.258787	-5.2548	1.48e-07	5.27e-05
chr2_219453562_219454209	402.57	0.989298	0.188341	5.25269	1.5e-07	5.31e-05
chr17_47218537_47219685	353.334	1.03326	0.197041	5.24388	1.57e-07	5.55e-05
chr7_24741647_24742255	38.9579	-2.07377	0.395484	-5.24363	1.57e-07	5.55e-05
chr3_26525085_26525535	34.9695	2.36431	0.451218	5.23985	1.61e-07	5.65e-05
chr9_108478450_108479201	51.1062	-1.80666	0.344907	-5.23811	1.62e-07	5.68e-05
chr20_42419870_42420660	50.8098	-1.86266	0.355672	-5.237	1.63e-07	5.7e-05
chr12_70876858_70877385	110.247	1.36687	0.261064	5.23576	1.64e-07	5.72e-05
chr19_16190986_16191563	79.1169	1.59568	0.304797	5.23523	1.65e-07	5.72e-05
chr20_53048392_53048747	134.343	1.31469	0.251227	5.23307	1.67e-07	5.78e-05
chr2_132268473_132268854	122.971	1.38375	0.264493	5.2317	1.68e-07	5.8e-05
chr1_54378443_54378981	68.6512	1.707	0.326333	5.23086	1.69e-07	5.81e-05
chr1_183633777_183634036	83.5178	1.53902	0.29426	5.23012	1.69e-07	5.82e-05
chr8_8600681_8601089	36.5772	-2.09778	0.401171	-5.22914	1.7e-07	5.83e-05
chr14_103512704_103513526	187.135	1.14649	0.219428	5.22491	1.74e-07	5.95e-05
chr4_182245967_182246806	134.142	1.31231	0.251706	5.21366	1.85e-07	6.29e-05
chr5_172637102_172637461	68.0567	1.68448	0.32306	5.21413	1.85e-07	6.29e-05
chr5_59025764_59026181	168.874	1.20474	0.23119	5.21103	1.88e-07	6.36e-05
chr5_67301315_67301604	25.2271	-2.60511	0.500093	-5.20925	1.9e-07	6.41e-05
chr16_87729346_87729909	59.7259	1.89336	0.363589	5.20741	1.91e-07	6.44e-05
chr3_185658406_185659196	85.9305	-1.4603	0.280428	-5.20741	1.91e-07	6.44e-05
chr11_7449379_7450094	70.8236	1.60168	0.307643	5.2063	1.93e-07	6.46e-05
chr2_219209456_219209707	35.0508	2.49845	0.480334	5.20147	1.98e-07	6.61e-05
chr19_27971086_27971495	36.3468	-2.08861	0.401675	-5.19974	2e-07	6.65e-05
chr12_121124474_121124852	79.9228	-1.54528	0.297281	-5.19805	2.01e-07	6.69e-05
chr2_217573514_217574058	67.5524	-1.57124	0.302371	-5.19641	2.03e-07	6.73e-05
chr8_66143041_66143415	230.068	1.07104	0.206123	5.1961	2.04e-07	6.73e-05
chr4_83256709_83257184	28.0129	-2.43391	0.468749	-5.19237	2.08e-07	6.85e-05
chr17_32943322_32944481	114.696	-1.30214	0.250888	-5.19012	2.1e-07	6.91e-05
chr15_40003600_40004035	41.927	-1.9446	0.374813	-5.1882	2.12e-07	6.96e-05
chr15_59143336_59143923	62.1046	1.73172	0.333866	5.18687	2.14e-07	7e-05
chr15_38554238_38554789	44.1858	-1.88543	0.363709	-5.18391	2.17e-07	7.06e-05
chr15_90183998_90185487	321.66	1.05572	0.203651	5.184	2.17e-07	7.06e-05
chr2_68971479_68972153	37.1041	-2.11436	0.40792	-5.18327	2.18e-07	7.06e-05
chr3_13600934_13601708	84.8686	-1.43591	0.277037	-5.18311	2.18e-07	7.06e-05
chr6_140051530_140051860	19.2824	-3.01004	0.580822	-5.18239	2.19e-07	7.07e-05
chr4_8457685_8458051	19.1171	3.64911	0.704596	5.17902	2.23e-07	7.18e-05
chr4_182929322_182929750	32.4989	-2.24845	0.434295	-5.17725	2.25e-07	7.23e-05
chr10_77773046_77773544	60.0265	1.77876	0.343853	5.17302	2.3e-07	7.34e-05
chr12_64461621_64462066	23.9995	-2.67135	0.516314	-5.17389	2.29e-07	7.34e-05
chr3_171462341_171462478	24.9988	3.07509	0.594427	5.1732	2.3e-07	7.34e-05
chr16_73329940_73330235	68.9973	-1.60257	0.310114	-5.16767	2.37e-07	7.51e-05
chr9_96491537_96492311	72.1548	1.59275	0.3082	5.16792	2.37e-07	7.51e-05
chr17_75776527_75776907	64.6819	1.67635	0.324594	5.16444	2.41e-07	7.63e-05
chr14_77128373_77128897	101.035	1.4283	0.27685	5.15912	2.48e-07	7.81e-05
chr15_33098230_33098556	48.2369	-1.84354	0.357341	-5.15904	2.48e-07	7.81e-05
chr17_47214926_47215243	52.9773	2.09423	0.406034	5.15778	2.5e-07	7.81e-05
chr2_77779803_77780304	44.4231	2.04557	0.396623	5.15748	2.5e-07	7.81e-05
chr7_1087960_1088532	157.253	1.24933	0.242237	5.15749	2.5e-07	7.81e-05
chr13_30818226_30818881	217.142	-1.1721	0.227312	-5.15635	2.52e-07	7.84e-05
chr11_20235283_20235743	33.0973	2.38018	0.461858	5.15348	2.56e-07	7.9e-05
chr11_76186044_76186403	44.9853	2.20103	0.427034	5.15422	2.55e-07	7.9e-05
chr3_41265781_41266432	176.367	1.17902	0.228781	5.15348	2.56e-07	7.9e-05
chr17_12637040_12637336	53.1817	-1.79925	0.349214	-5.15227	2.57e-07	7.93e-05
chr4_70895844_70896495	88.5228	1.47115	0.285623	5.15067	2.6e-07	7.96e-05
chr7_137609596_137609844	29.6821	-2.3122	0.448911	-5.15067	2.6e-07	7.96e-05
chr6_134908880_134909489	63.0061	-1.64033	0.318659	-5.14761	2.64e-07	8.07e-05
chr2_119579837_119580313	120.287	1.29079	0.250878	5.14509	2.67e-07	8.16e-05
chr1_72011752_72012048	26.5408	2.79589	0.543734	5.14202	2.72e-07	8.28e-05
chr1_151988350_151988916	45.4974	-1.84577	0.359346	-5.13648	2.8e-07	8.48e-05
chr11_78030319_78030985	148.464	1.2127	0.236083	5.13676	2.8e-07	8.48e-05
chr1_12014636_12015222	168.122	1.20732	0.235079	5.13581	2.81e-07	8.49e-05
chr17_81507436_81507670	54.282	1.91327	0.372803	5.13211	2.87e-07	8.61e-05
chr3_156605691_156606491	193.253	1.10536	0.215397	5.13175	2.87e-07	8.61e-05
chr8_126434766_126435557	85.0397	1.49851	0.291996	5.13195	2.87e-07	8.61e-05
chr8_143873931_143874680	128.699	1.31138	0.255639	5.1298	2.9e-07	8.68e-05
chr16_27286547_27286796	34.9093	-2.15849	0.420941	-5.12776	2.93e-07	8.69e-05
chr17_1847135_1847581	208.578	1.08964	0.212481	5.12815	2.93e-07	8.69e-05
chr2_230398683_230399172	77.6629	1.54203	0.300727	5.12768	2.93e-07	8.69e-05
chr4_76194267_76194637	32.3651	-2.20918	0.430853	-5.12744	2.94e-07	8.69e-05
chr7_5766228_5766755	27.4526	-2.40348	0.468636	-5.12867	2.92e-07	8.69e-05
chr18_79791347_79791939	48.2091	-1.78363	0.347957	-5.126	2.96e-07	8.73e-05
chr13_31101404_31102113	98.5938	-1.38157	0.269585	-5.12482	2.98e-07	8.77e-05
chr7_5678472_5678895	95.8056	1.39482	0.272248	5.12336	3e-07	8.81e-05
chr1_198387466_198388136	48.5671	-1.84958	0.361059	-5.12265	3.01e-07	8.83e-05
chr3_37504415_37504998	47.5785	1.89774	0.370612	5.12056	3.05e-07	8.9e-05
chr7_150200490_150200733	23.6477	2.93569	0.573614	5.11787	3.09e-07	9.01e-05
chr11_35629982_35630494	44.4669	-1.93101	0.377439	-5.11608	3.12e-07	9.01e-05
chr3_183548198_183548602	39.1323	-2.03517	0.397757	-5.11662	3.11e-07	9.01e-05
chr4_188439678_188440307	135.316	1.24753	0.243833	5.11635	3.12e-07	9.01e-05
chr8_94739789_94740208	75.9619	1.55396	0.303666	5.11733	3.1e-07	9.01e-05
chr7_72492413_72492902	88.3434	1.44115	0.281774	5.11455	3.14e-07	9.06e-05
chr1_101203944_101204567	228.919	1.05282	0.205903	5.11321	3.17e-07	9.11e-05
chr6_137728716_137729333	61.8588	-1.6242	0.317744	-5.11165	3.19e-07	9.16e-05
chr6_166078268_166078659	53.3818	-1.78149	0.349022	-5.10423	3.32e-07	9.5e-05
chr14_94600768_94601014	31.9584	-2.20126	0.431628	-5.09991	3.4e-07	9.7e-05
chr2_204089528_204090048	27.1008	2.60545	0.511239	5.09634	3.46e-07	9.86e-05
chr12_93341673_93342128	169.377	1.1424	0.224196	5.09553	3.48e-07	9.88e-05
chr10_14578532_14578810	15.2112	-3.58658	0.704238	-5.09286	3.53e-07	0.0001
chr2_203626988_203627839	39.1153	-1.98882	0.39058	-5.09197	3.54e-07	0.000100237
chr3_141656869_141657066	27.9639	-2.33025	0.457986	-5.08804	3.62e-07	0.0001021
chr1_243926828_243927231	23.4255	-2.62001	0.515228	-5.08515	3.67e-07	0.000103431
chr2_39631675_39632264	55.4583	-1.71413	0.337136	-5.08439	3.69e-07	0.000103612
chr4_186624988_186625341	41.2251	-1.94596	0.382865	-5.08263	3.72e-07	0.000104338
chr10_78925787_78926125	49.8003	-1.77345	0.348966	-5.08202	3.73e-07	0.000104434
chr6_136968979_136969852	152.211	1.17349	0.231079	5.07828	3.81e-07	0.000106272
chr1_160458991_160459553	42.9521	-1.87516	0.369303	-5.07757	3.82e-07	0.000106402
chr22_31789853_31790618	202.854	1.11642	0.219889	5.07719	3.83e-07	0.000106402
chr8_125333903_125334668	235.733	1.06243	0.209277	5.07667	3.84e-07	0.000106451
chr13_34153467_34153822	37.3423	2.27745	0.448715	5.07549	3.87e-07	0.000106877
chr5_157286611_157287286	348.016	0.953717	0.188184	5.06801	4.02e-07	0.000110913
chr20_53149387_53149875	120.22	1.32984	0.262642	5.06331	4.12e-07	0.000113432
chr2_217919824_217920223	111.592	1.30616	0.258015	5.06234	4.14e-07	0.000113755
chr7_100065672_100066340	86.4963	1.5159	0.299606	5.05965	4.2e-07	0.000115116
chr1_96538124_96538751	110.839	1.31752	0.26052	5.05726	4.25e-07	0.000116308
chr9_69306835_69308231	325.419	0.993879	0.196671	5.05351	4.34e-07	0.000118092
chr9_71648500_71648924	52.9578	1.79169	0.354536	5.05361	4.34e-07	0.000118092
chr11_107840623_107841099	44.1891	-1.95477	0.386886	-5.05257	4.36e-07	0.000118414
chr17_57481978_57482333	42.2446	-1.91184	0.378516	-5.05088	4.4e-07	0.000118944
chr6_158284237_158284752	110.41	1.30973	0.259294	5.05112	4.39e-07	0.000118944
chr1_183730052_183730611	92.3099	1.4134	0.280242	5.04351	4.57e-07	0.000123077
chrX_94931912_94932796	47.4496	1.86239	0.369238	5.04387	4.56e-07	0.000123077
chr1_150162869_150163613	508.876	0.973926	0.193138	5.04263	4.59e-07	0.00012332
chr2_164967768_164968109	17.7451	-3.1684	0.628365	-5.0423	4.6e-07	0.00012332
chr1_89201263_89201706	78.5908	1.51818	0.30117	5.04094	4.63e-07	0.000123928
chr3_14432202_14432632	89.5265	-1.358	0.269418	-5.04048	4.64e-07	0.000123958
chr9_437604_438299	52.5731	-1.69105	0.335684	-5.03763	4.71e-07	0.000125549
chr5_149383364_149383971	198.551	1.07254	0.213158	5.03169	4.86e-07	0.000129224
chr20_61753435_61753675	19.1625	-2.98695	0.593949	-5.02896	4.93e-07	0.00013065
chr3_119279097_119279606	57.0783	1.71547	0.341131	5.02876	4.94e-07	0.00013065
chr6_37242392_37242991	62.8467	-1.56119	0.310613	-5.02615	5e-07	0.000132156
chr10_44569632_44570029	39.5687	-1.94425	0.386939	-5.02469	5.04e-07	0.000132883
chrX_106927373_106927891	63.1592	1.64199	0.326902	5.02288	5.09e-07	0.000133853
chr2_54224934_54225300	49.3307	1.85964	0.370554	5.01852	5.21e-07	0.000136054
chr6_10441035_10441771	29.8974	-2.21742	0.441834	-5.01867	5.2e-07	0.000136054
chr6_150403413_150403920	90.5271	-1.47487	0.293871	-5.01876	5.2e-07	0.000136054
chr9_122001396_122002120	209.64	1.05875	0.210997	5.01782	5.23e-07	0.000136262
chr2_2646720_2647054	76.2246	1.53291	0.305709	5.01428	5.32e-07	0.000138213
chr4_108429770_108430288	20.6085	3.12255	0.622697	5.01456	5.32e-07	0.000138213
chr2_159650455_159650885	68.1462	1.57726	0.314765	5.01092	5.42e-07	0.000139477
chr21_31538871_31539254	55.1878	1.74578	0.348341	5.0117	5.4e-07	0.000139477
chr5_133531589_133532038	46.8445	-1.80396	0.35999	-5.01114	5.41e-07	0.000139477
chr5_171892426_171892690	52.4075	1.76627	0.35241	5.01198	5.39e-07	0.000139477
chr1_236091609_236092370	61.7413	1.68637	0.336677	5.00886	5.48e-07	0.000140678
chr10_88951599_88952119	170.256	1.1476	0.229215	5.00664	5.54e-07	0.000141197
chr15_87352138_87352476	33.8678	-2.07433	0.414355	-5.00616	5.55e-07	0.000141197
chr20_51262211_51262501	32.9508	2.61944	0.523222	5.00636	5.55e-07	0.000141197
chr6_112172560_112172911	68.6294	1.55947	0.311484	5.00659	5.54e-07	0.000141197
chr7_44980424_44980943	37.1451	2.11367	0.422135	5.00708	5.53e-07	0.000141197
chr2_124877000_124877533	100.075	-1.41882	0.283483	-5.00496	5.59e-07	0.000141784
chr2_129281441_129282153	83.0197	1.49284	0.298301	5.00447	5.6e-07	0.000141859
chr2_134493858_134494166	42.4566	1.95228	0.390312	5.00186	5.68e-07	0.000143498
chr6_17289516_17290112	307.443	1.02995	0.205999	4.99979	5.74e-07	0.000144748
chr1_229296442_229296985	137.233	-1.2041	0.240951	-4.99729	5.81e-07	0.000146167
chr14_22791323_22791699	57.7365	-1.60849	0.321883	-4.99712	5.82e-07	0.000146167
chr5_124156533_124156929	37.176	4.60161	0.921179	4.99534	5.87e-07	0.00014722
chr12_3256042_3256637	325.291	0.948616	0.189923	4.99474	5.89e-07	0.00014738
chr17_3870848_3871262	176.736	1.15542	0.231535	4.99026	6.03e-07	0.000150535
chr15_88918789_88919163	46.9613	-1.85203	0.371182	-4.98955	6.05e-07	0.000150787
chr4_72959476_72959882	66.1725	1.69086	0.338987	4.98797	6.1e-07	0.000151717
chr8_141292565_141293033	112.503	1.35914	0.27267	4.98458	6.21e-07	0.000154092
chrX_129665970_129666612	27.0498	-2.45121	0.492027	-4.98186	6.3e-07	0.000155958
chr12_111444835_111445433	178.478	1.1103	0.222922	4.98067	6.34e-07	0.000156606
chr1_234709459_234710417	173.123	1.14855	0.230627	4.9801	6.36e-07	0.000156753
chr17_31596580_31597101	152.045	-1.14099	0.229151	-4.97921	6.38e-07	0.000156851
chr7_132390728_132391110	22.5867	-2.61077	0.524306	-4.97948	6.38e-07	0.000156851
chr15_69782811_69783087	37.5183	2.10572	0.423098	4.97691	6.46e-07	0.000158186
chr17_50919575_50920179	255.027	1.04815	0.210607	4.9768	6.46e-07	0.000158186
chr2_182372586_182373256	54.7576	-1.66102	0.33393	-4.97416	6.55e-07	0.000160033
chr20_1934638_1935614	278.028	1.07832	0.216801	4.97377	6.57e-07	0.000160046
chr12_1932284_1932650	184.563	1.13008	0.227276	4.97229	6.62e-07	0.000160949
chr5_83095496_83096366	223.27	-1.03277	0.207722	-4.9719	6.63e-07	0.000160957
chr1_154432613_154433113	164.325	1.30311	0.262158	4.97072	6.67e-07	0.000161167
chr2_36516179_36516732	26.881	-2.31997	0.466748	-4.97051	6.68e-07	0.000161167
chr8_99606146_99606487	31.3523	-2.16092	0.434735	-4.97067	6.67e-07	0.000161167
chr22_21037674_21038187	50.1799	-1.78058	0.358279	-4.96982	6.7e-07	0.00016142
chr11_65426641_65427748	441.772	0.888547	0.178866	4.96767	6.78e-07	0.000162908
chr12_70040145_70040432	21.2602	-2.65015	0.533903	-4.96372	6.92e-07	0.000165933
chrX_53882337_53882705	60.9548	-1.60266	0.323222	-4.95838	7.11e-07	0.000170226
chr19_55232155_55232609	72.5516	1.57424	0.318168	4.94784	7.5e-07	0.000178944
chr22_19666582_19667224	40.6456	-1.86786	0.377507	-4.94787	7.5e-07	0.000178944
chr3_127581967_127582330	125.551	1.2371	0.250043	4.94754	7.52e-07	0.000178944
chr3_64253416_64254103	68.4521	1.58452	0.320513	4.9437	7.67e-07	0.000182146
chr4_148007287_148007666	38.707	-1.91401	0.387244	-4.94265	7.71e-07	0.000182782
chr9_136090668_136091147	149.563	1.25394	0.253759	4.94145	7.75e-07	0.000183556
chr3_71450968_71451396	34.5058	2.16462	0.438145	4.94043	7.8e-07	0.000184171
chr15_31471696_31472256	55.3395	-1.61087	0.326114	-4.93958	7.83e-07	0.000184619
chr2_121872448_121873083	43.7845	1.91535	0.387881	4.938	7.89e-07	0.000185412
chr5_148833139_148833412	57.7224	1.69245	0.342736	4.93807	7.89e-07	0.000185412
chr2_23009677_23010195	61.4251	-1.55107	0.314196	-4.93662	7.95e-07	0.000185662
chr5_60633022_60633761	70.875	-1.50932	0.305735	-4.93669	7.95e-07	0.000185662
chr6_72761792_72762162	77.0781	1.51006	0.305866	4.93699	7.93e-07	0.000185662
chr19_35518323_35518746	56.1175	-1.65749	0.33591	-4.93433	8.04e-07	0.000187506
chr2_160209537_160209821	34.3265	-2.03667	0.413003	-4.93136	8.17e-07	0.000190021
chr2_95007738_95008558	83.9749	1.44424	0.292897	4.93088	8.19e-07	0.000190123
chr1_162538831_162539366	28.542	-2.2355	0.453521	-4.92921	8.26e-07	0.000190889
chr12_94049780_94050046	30.336	2.3242	0.471537	4.929	8.27e-07	0.000190889
chr13_104315575_104315962	25.5403	-2.47027	0.501171	-4.929	8.27e-07	0.000190889
chr1_201702963_201703382	92.5883	1.44335	0.292896	4.92786	8.31e-07	0.000191645
chrX_69195199_69196207	89.8462	1.45864	0.296061	4.92682	8.36e-07	0.000192308
chr1_245290754_245291395	99.4881	1.34143	0.272347	4.92544	8.42e-07	0.000193312
chr8_28657764_28658311	71.8193	1.5298	0.310662	4.9243	8.47e-07	0.000194073
chr1_24290029_24290403	47.8762	1.81746	0.369174	4.92305	8.52e-07	0.000194293
chr14_104709702_104709948	35.9114	2.16287	0.439341	4.923	8.52e-07	0.000194293
chr16_59060266_59060565	17.1614	-3.10598	0.63086	-4.92341	8.5e-07	0.000194293
chr1_168439615_168440243	124.558	1.24729	0.253382	4.92257	8.54e-07	0.000194358
chr14_35341296_35342104	224.458	1.04654	0.212659	4.9212	8.6e-07	0.000195361
chr4_38099874_38100601	47.9034	-1.82781	0.371552	-4.91938	8.68e-07	0.000196826
chr19_19461783_19462749	342.154	1.00005	0.203386	4.917	8.79e-07	0.000198864
chr5_127088191_127088552	29.8018	-2.17397	0.442671	-4.91102	9.06e-07	0.000204654
chr17_56915809_56916190	32.2231	-2.08492	0.424706	-4.9091	9.15e-07	0.000206285
chr5_10301914_10302215	56.8095	1.68349	0.343275	4.90422	9.38e-07	0.000211096
chr12_12979700_12980220	57.5301	-1.5885	0.324149	-4.90054	9.56e-07	0.000213917
chr12_63880724_63881445	229.641	1.02096	0.208335	4.90057	9.56e-07	0.000213917
chr5_90598194_90598723	69.3279	1.57988	0.32243	4.89992	9.59e-07	0.000213917
chr6_133130900_133131319	88.1501	-1.42057	0.289843	-4.90116	9.53e-07	0.000213917
chr9_114551879_114552338	76.609	-1.43497	0.292862	-4.89983	9.59e-07	0.000213917
chr12_1966705_1967215	154.826	1.16361	0.237531	4.8988	9.64e-07	0.000214272
chr3_123096644_123097084	97.066	1.32109	0.269663	4.89903	9.63e-07	0.000214272
chr11_69044047_69044524	479.593	0.916325	0.187065	4.89844	9.66e-07	0.000214274
chr13_25990791_25991184	124.512	-1.25025	0.255275	-4.89765	9.7e-07	0.000214367
chr4_15913692_15913960	20.4231	-2.71425	0.554171	-4.89786	9.69e-07	0.000214367
chr1_12472847_12473233	170.828	1.1308	0.230964	4.89598	9.78e-07	0.000215422
chr16_1932127_1932936	101.886	1.40096	0.286132	4.89621	9.77e-07	0.000215422
chr12_62724931_62725447	38.0314	-1.96176	0.400753	-4.89518	9.82e-07	0.000215916
chr11_29319276_29319693	21.891	-2.70132	0.552139	-4.89246	9.96e-07	0.000218535
chr16_84994830_84995190	29.5794	-2.25083	0.460125	-4.89178	9.99e-07	0.000218902
chr2_99928743_99928978	27.8776	2.41542	0.493855	4.89095	1e-06	0.000219435
chr1_167683616_167684390	360.243	0.961923	0.196729	4.88959	1.01e-06	0.000220178
chr7_39252741_39253371	88.7158	-1.33154	0.272305	-4.88987	1.01e-06	0.000220178
chr3_162780317_162780613	38.6428	2.04222	0.417729	4.88885	1.01e-06	0.000220612
chr20_36825361_36825831	55.9504	1.68306	0.344314	4.88817	1.02e-06	0.000220994
chr11_78032110_78032352	38.841	2.06401	0.422372	4.88671	1.03e-06	0.000221468
chr4_13670634_13671122	54.0424	1.78916	0.366098	4.88709	1.02e-06	0.000221468
chr9_80699404_80700055	178.274	1.10892	0.226921	4.88683	1.02e-06	0.000221468
chr14_105038684_105039038	95.2736	1.36115	0.278575	4.88611	1.03e-06	0.000221751
chr9_20880369_20880580	24.4211	2.69988	0.552887	4.88323	1.04e-06	0.000224617
chr13_94310353_94310846	23.3859	-2.47324	0.506828	-4.87985	1.06e-06	0.000227314
chr19_9075235_9076000	139.563	-1.16178	0.238053	-4.88036	1.06e-06	0.000227314
chr20_49344956_49345307	50.7214	-1.69968	0.348294	-4.88001	1.06e-06	0.000227314
chrX_44950870_44951193	50.8212	1.74388	0.357469	4.87842	1.07e-06	0.000228569
chr20_1879223_1879817	210.768	1.11029	0.22762	4.87781	1.07e-06	0.00022888
chr2_23376950_23377367	28.9091	-2.24608	0.460619	-4.87621	1.08e-06	0.000229952
chr6_47168187_47168536	51.5046	-1.69384	0.347346	-4.87652	1.08e-06	0.000229952
chr16_88497670_88498494	155.382	-1.10386	0.226451	-4.8746	1.09e-06	0.000231431
chr5_117803560_117803890	20.0781	-2.71155	0.556461	-4.87284	1.1e-06	0.000233103
chr10_76774948_76775559	170.862	1.08737	0.223193	4.87188	1.11e-06	0.00023381
chr16_88768101_88768430	115.742	1.23534	0.253581	4.87157	1.11e-06	0.00023381
chrX_65515982_65516304	28.0241	-2.259	0.4639	-4.86958	1.12e-06	0.000235767
chr14_23437883_23438706	558.046	0.873424	0.179413	4.86824	1.13e-06	0.00023697
chr5_86812798_86813053	40.6868	2.03246	0.417667	4.86622	1.14e-06	0.000238993
chr13_97141643_97141909	66.7022	-1.47036	0.302239	-4.86491	1.15e-06	0.00024018
chr17_50111387_50112472	374.347	0.923442	0.189943	4.86169	1.16e-06	0.000243702
chr16_29943877_29944503	117.846	-1.21905	0.250778	-4.86108	1.17e-06	0.00024404
chr1_16003914_16004297	41.1293	1.91524	0.394102	4.85976	1.18e-06	0.000245257
chr13_35994370_35994954	28.4957	-2.21265	0.455507	-4.85754	1.19e-06	0.000247597
chr4_28287752_28288213	21.5737	-2.63384	0.54233	-4.85652	1.19e-06	0.000248456
chr14_70734895_70735328	61.0801	1.6807	0.34632	4.85302	1.22e-06	0.000251616
chr5_122350678_122350985	63.864	1.57743	0.325006	4.85354	1.21e-06	0.000251616
chr8_133556687_133557416	118.937	1.31361	0.270663	4.85332	1.21e-06	0.000251616
chr4_32499210_32499597	20.6256	-2.6488	0.545888	-4.85228	1.22e-06	0.000252139
chr10_71338863_71339530	96.5729	-1.33824	0.275944	-4.84969	1.24e-06	0.000255019
chr4_141214799_141215403	36.1227	2.10046	0.433221	4.84847	1.24e-06	0.000255734
chr5_151098084_151098366	47.6167	1.80434	0.372145	4.84849	1.24e-06	0.000255734
chr9_90112799_90113452	38.3586	-1.87855	0.387529	-4.84751	1.25e-06	0.000256548
chr7_90579106_90579752	26.7478	-2.3248	0.479628	-4.8471	1.25e-06	0.00025666
chr17_42953686_42954081	39.3853	2.11972	0.437404	4.84615	1.26e-06	0.000257363
chr6_24546481_24546801	77.7953	1.47934	0.305276	4.84589	1.26e-06	0.000257363
chr1_159054251_159054747	31.0294	-2.14222	0.4421	-4.84555	1.26e-06	0.00025738
chr2_155770550_155770851	15.291	-3.27619	0.676393	-4.84362	1.27e-06	0.00025947
chr7_102042205_102042597	38.1356	-1.89084	0.390648	-4.84027	1.3e-06	0.000263083
chr9_95150984_95151613	85.5664	1.45167	0.299918	4.84022	1.3e-06	0.000263083
chr11_35515284_35515661	50.3367	-1.77163	0.366211	-4.83774	1.31e-06	0.000265942
chr3_57974806_57975165	49.6915	-1.6713	0.345562	-4.83647	1.32e-06	0.000267209
chr3_73516720_73517170	65.8778	1.68457	0.348367	4.83563	1.33e-06	0.000267906
chr7_44757322_44757811	65.3219	1.53827	0.318135	4.83528	1.33e-06	0.000267929
chr1_63792043_63792567	346.385	0.976815	0.202074	4.83395	1.34e-06	0.000268859
chr9_20215547_20216014	52.0953	1.72344	0.356516	4.83413	1.34e-06	0.000268859
chr21_42097912_42098263	39.7242	-1.83239	0.379329	-4.83061	1.36e-06	0.000272958
chr19_18274370_18275785	290.775	0.975948	0.202074	4.82965	1.37e-06	0.000273393
chr7_90846227_90846544	49.1719	1.74181	0.360628	4.82993	1.37e-06	0.000273393
chr22_37630976_37631362	212.507	1.07702	0.223087	4.82779	1.38e-06	0.000275502
chr15_99669283_99669602	82.1153	1.5107	0.312982	4.82681	1.39e-06	0.000275619
chr6_101401815_101403065	151.356	1.11584	0.231179	4.82674	1.39e-06	0.000275619
chr6_148267802_148268065	20.0363	-2.71426	0.562294	-4.82711	1.39e-06	0.000275619
chr21_26834816_26835943	70.6091	2.96093	0.613879	4.82331	1.41e-06	0.00027996
chr7_13990402_13990852	146.909	1.12283	0.232853	4.82205	1.42e-06	0.000281287
chr15_57485823_57486218	47.5626	-1.68677	0.350008	-4.81924	1.44e-06	0.000284822
chr3_119652269_119653006	206.407	1.06571	0.221309	4.81546	1.47e-06	0.000289789
chr1_31127271_31127608	30.5039	-2.08653	0.433551	-4.81265	1.49e-06	0.000293434
chr20_53570335_53571146	145.828	1.12644	0.234161	4.81053	1.51e-06	0.000296088
chr4_182143777_182145364	275.3	0.948325	0.197181	4.8094	1.51e-06	0.000297287
chr14_96253101_96253518	53.2377	-1.66923	0.347304	-4.80625	1.54e-06	0.00030139
chr4_168264787_168265256	80.9313	1.40964	0.293306	4.80603	1.54e-06	0.00030139
chr11_41954059_41954371	16.1513	-3.32606	0.692155	-4.80537	1.54e-06	0.000301908
chr2_141392503_141392969	34.9136	-1.96727	0.409422	-4.80498	1.55e-06	0.000302012
chr2_41922206_41922529	81.7207	-1.4528	0.302458	-4.8033	1.56e-06	0.000304074
chr3_138066906_138067280	69.6627	1.54575	0.32207	4.79943	1.59e-06	0.00030953
chr22_17781170_17782027	89.8734	1.34582	0.280686	4.79475	1.63e-06	0.000316338
chr7_130292827_130293214	29.3998	-2.25609	0.470608	-4.79398	1.64e-06	0.000317055
chr1_227344130_227344380	13.8013	-3.55618	0.742446	-4.78982	1.67e-06	0.000321958
chr17_63381073_63381460	80.0026	1.42735	0.298006	4.78967	1.67e-06	0.000321958
chr4_13907281_13907835	41.0882	-1.93543	0.404087	-4.78965	1.67e-06	0.000321958
chr7_149600640_149601043	131.033	1.15541	0.241219	4.78987	1.67e-06	0.000321958
chr16_9797383_9797732	23.0698	-2.53359	0.529133	-4.78819	1.68e-06	0.000323799
chr5_109743656_109744254	44.3411	-1.75926	0.367525	-4.78678	1.69e-06	0.000325565
chr2_120540306_120540797	120.563	-1.20583	0.251938	-4.7862	1.7e-06	0.000325639
chr6_39835792_39836326	35.6496	-1.91204	0.399498	-4.78611	1.7e-06	0.000325639
chr6_125597472_125597853	65.1357	1.53551	0.320895	4.78508	1.71e-06	0.000326811
chr2_218245136_218245706	124.227	1.24962	0.261347	4.78147	1.74e-06	0.000332217
chr11_6586483_6587288	160.551	1.15563	0.241721	4.78085	1.75e-06	0.000332343
chr7_115357171_115357629	25.7096	2.51211	0.525462	4.78077	1.75e-06	0.000332343
chr10_90935488_90935941	215.787	1.02173	0.213863	4.77751	1.77e-06	0.00033726
chr14_68937745_68938342	192.163	1.06688	0.223338	4.777	1.78e-06	0.000337599
chr4_182325813_182326328	204.189	1.01928	0.21359	4.77215	1.82e-06	0.000345295
chr11_128210283_128210829	44.2475	-1.73388	0.363475	-4.77029	1.84e-06	0.000347966
chr10_79433177_79433689	196.885	1.03047	0.216125	4.76792	1.86e-06	0.000351551
chr10_116708328_116708844	34.9548	-1.96237	0.411674	-4.7668	1.87e-06	0.000352959
chr1_170126619_170127153	45.72	-1.74632	0.366624	-4.76324	1.91e-06	0.000357479
chr10_86635448_86635708	16.0089	-3.0673	0.643901	-4.76362	1.9e-06	0.000357479
chr11_77884251_77884633	23.4863	-2.39484	0.502766	-4.76333	1.9e-06	0.000357479
chr22_27512286_27512784	57.1752	-1.56217	0.327979	-4.76301	1.91e-06	0.000357479
chr13_110012065_110012521	33.7322	-2.00448	0.42096	-4.76168	1.92e-06	0.000358758
chr8_130232837_130233130	23.1812	-2.44402	0.513258	-4.76177	1.92e-06	0.000358758
chr8_42812297_42812660	46.7265	1.91396	0.402	4.76111	1.93e-06	0.000359228
chr1_17874302_17875238	91.5116	-1.31465	0.276329	-4.75756	1.96e-06	0.000364906
chr2_68414923_68415427	54.7009	1.64504	0.34579	4.75733	1.96e-06	0.000364906
chr1_206470326_206471623	272.165	0.961433	0.202138	4.75633	1.97e-06	0.000366174
chr7_44881683_44882004	88.7346	1.36551	0.28727	4.75341	2e-06	0.000370948
chr22_26476776_26477290	21.6894	-2.64008	0.556207	-4.74657	2.07e-06	0.000382553
chr9_98488654_98488906	22.8804	-2.51754	0.530374	-4.74673	2.07e-06	0.000382553
chr14_98069622_98070191	49.4594	-1.6337	0.344258	-4.74555	2.08e-06	0.000383908
chr2_46564459_46565254	953.202	0.769887	0.16231	4.74332	2.1e-06	0.000387588
chr1_93341397_93341555	25.618	2.50146	0.527887	4.73862	2.15e-06	0.000396077
chr3_119651627_119651922	83.2641	1.35914	0.286869	4.73784	2.16e-06	0.000397013
chr1_64060300_64061132	96.3113	1.37573	0.290455	4.73646	2.17e-06	0.000399133
chr5_38872193_38872567	30.6216	-2.19052	0.462533	-4.73592	2.18e-06	0.00039961
chr14_76917819_76918092	56.7822	1.6546	0.349415	4.73536	2.19e-06	0.00040012
chr9_80797926_80798685	46.8467	1.85063	0.390989	4.73321	2.21e-06	0.000403783
chr15_25883885_25884245	18.4614	-2.74588	0.580299	-4.73184	2.22e-06	0.00040591
chr7_75676116_75676580	110.492	1.23186	0.260485	4.72909	2.26e-06	0.000410837
chr2_161030486_161031016	24.2232	-2.48834	0.526251	-4.72842	2.26e-06	0.000411586
chr4_67456618_67457160	49.38	1.71373	0.362458	4.72807	2.27e-06	0.000411688
chr3_60202540_60202958	20.9695	2.85283	0.603465	4.72741	2.27e-06	0.00041243
chr22_31271561_31271813	45.6201	-1.72632	0.365233	-4.72663	2.28e-06	0.000413402
chr11_71299309_71299829	36.5317	-1.85983	0.393668	-4.72436	2.31e-06	0.000417435
chr6_152098886_152100311	138.694	1.21661	0.257541	4.72396	2.31e-06	0.00041765
chr6_121950915_121951471	81.5278	1.37899	0.292094	4.72104	2.35e-06	0.000423078
chr10_29231719_29232121	41.5341	2.05399	0.435248	4.71912	2.37e-06	0.000426456
chr16_69917840_69918155	23.231	-2.35629	0.499392	-4.71832	2.38e-06	0.000427516
chrX_16054114_16054657	31.1091	2.17192	0.460465	4.71679	2.4e-06	0.000430121
chr1_1777021_1777335	63.3716	1.56611	0.332051	4.71647	2.4e-06	0.000430171
chr12_70550010_70550517	55.0063	1.67346	0.354859	4.71583	2.41e-06	0.000430892
chr9_129596688_129597879	134.819	1.15713	0.245553	4.71235	2.45e-06	0.000437694
chr1_111603975_111604387	112.948	1.22135	0.259264	4.71082	2.47e-06	0.000440341
chr1_43582162_43582679	102.235	-1.22087	0.259248	-4.70929	2.49e-06	0.000442116
chr2_234427675_234428011	24.2898	-2.3378	0.496442	-4.70912	2.49e-06	0.000442116
chr6_3247149_3247501	57.1336	-1.55396	0.329967	-4.70945	2.48e-06	0.000442116
chr10_112834431_112835018	185.544	1.0192	0.216456	4.70856	2.49e-06	0.000442687
chr1_188386174_188386520	24.3068	2.51506	0.534717	4.70353	2.56e-06	0.000452764
chr7_96421911_96422534	127.193	1.19105	0.253233	4.70339	2.56e-06	0.000452764
chr13_26442579_26442924	41.2577	-1.8286	0.388935	-4.70156	2.58e-06	0.000455596
chr3_145902207_145902478	26.2615	-2.27443	0.483793	-4.70124	2.59e-06	0.000455596
chr9_137612168_137612552	63.4508	-1.44357	0.30705	-4.70142	2.58e-06	0.000455596
chr17_80959341_80960163	166.299	1.06584	0.22691	4.6972	2.64e-06	0.000462707
chr19_15404132_15405055	238.403	0.971319	0.206776	4.69745	2.63e-06	0.000462707
chr3_197031258_197031909	101.752	-1.23451	0.262806	-4.69744	2.63e-06	0.000462707
chr17_GL000205v2_random_135546_136481	62.2742	-1.62828	0.346718	-4.69626	2.65e-06	0.000464184
chr11_64064430_64065049	59.6193	1.70736	0.363614	4.69553	2.66e-06	0.000465169
chr8_125362649_125363099	60.8922	-1.5406	0.328232	-4.69365	2.68e-06	0.000468821
chr10_14404955_14405485	41.4773	-1.80922	0.385589	-4.6921	2.7e-06	0.000471341
chr3_57969775_57970218	55.5809	-1.58675	0.338183	-4.69197	2.71e-06	0.000471341
chr17_1005406_1005778	53.7602	1.63669	0.34891	4.69085	2.72e-06	0.000472575
chr20_48187022_48187455	47.1397	-1.8271	0.389489	-4.69101	2.72e-06	0.000472575
chr8_107751366_107752105	95.217	1.28505	0.273965	4.69057	2.72e-06	0.000472575
chr12_1277967_1278333	33.6272	2.17018	0.462736	4.68989	2.73e-06	0.000472825
chr2_66443770_66444338	92.4945	1.32785	0.283125	4.68998	2.73e-06	0.000472825
chr10_76553828_76554837	84.7437	1.33064	0.283782	4.68894	2.75e-06	0.000473363
chr10_90179653_90180192	62.0322	-1.49594	0.319032	-4.68899	2.75e-06	0.000473363
chr18_50425138_50425567	85.0096	1.39077	0.296615	4.6888	2.75e-06	0.000473363
chrX_154355294_154356161	90.5048	1.33397	0.284593	4.68728	2.77e-06	0.000476212
chr11_132576774_132577197	37.5291	-1.82002	0.388646	-4.68297	2.83e-06	0.000485267
chr17_40952680_40953132	25.9069	-2.24802	0.480054	-4.68285	2.83e-06	0.000485267
chr11_111846619_111847046	28.7338	-2.11526	0.45179	-4.68195	2.84e-06	0.000486746
chr7_46751856_46752243	30.7349	-2.18396	0.466748	-4.6791	2.88e-06	0.000492875
chr5_57494576_57495053	100.962	-1.20735	0.258061	-4.67853	2.89e-06	0.000493551
chr12_105418786_105419162	32.7757	-1.96615	0.42029	-4.67809	2.9e-06	0.000493937
chr3_39096869_39097138	44.7949	-1.69597	0.362647	-4.67664	2.92e-06	0.000496749
chr9_110155638_110156058	64.0068	1.644	0.351991	4.67057	3e-06	0.00051095
chr9_33506548_33506962	31.9887	-2.12502	0.455105	-4.6693	3.02e-06	0.000513417
chr4_87310857_87311407	35.0551	2.01856	0.432334	4.66899	3.03e-06	0.000513485
chr1_178098243_178098614	56.5589	1.60145	0.343115	4.66739	3.05e-06	0.000516779
chr8_17348672_17349203	39.6813	-1.90155	0.407827	-4.66265	3.12e-06	0.000528098
chr4_54879665_54879934	25.3216	-2.28366	0.489839	-4.66207	3.13e-06	0.000528866
chr5_35012880_35013203	95.0212	1.33454	0.286316	4.66109	3.15e-06	0.000530664
chr17_43417144_43418293	211.729	1.00264	0.215175	4.65965	3.17e-06	0.000533674
chr13_40109340_40109699	18.6793	-2.76291	0.593055	-4.65877	3.18e-06	0.000535207
chr7_35446075_35446595	277.007	0.954116	0.204975	4.6548	3.24e-06	0.000544887
chr13_64274437_64274772	80.5063	1.36825	0.294007	4.6538	3.26e-06	0.000546792
chr13_49292770_49293107	47.8449	1.71345	0.368331	4.65192	3.29e-06	0.00055001
chr8_25283291_25283694	40.4489	1.90388	0.409281	4.65175	3.29e-06	0.00055001
chr8_140549621_140550472	246.114	0.936702	0.201363	4.6518	3.29e-06	0.00055001
chr17_47213974_47214437	74.4421	1.48345	0.318931	4.65131	3.3e-06	0.000550185
chr7_117470777_117471084	32.987	2.04686	0.440079	4.65113	3.3e-06	0.000550185
chr7_100226532_100227119	347.313	0.964378	0.207367	4.65059	3.31e-06	0.000550886
chr13_38730346_38730636	27.2714	2.48696	0.534917	4.64924	3.33e-06	0.000553751
chr2_152646833_152647096	26.964	-2.12435	0.457046	-4.64799	3.35e-06	0.000556374
chr11_64335078_64335409	117.9	-1.14429	0.246267	-4.64656	3.38e-06	0.000559488
chr1_8004702_8005454	180.953	-1.02127	0.219938	-4.64346	3.43e-06	0.000567178
chr3_119769792_119770149	18.7305	-2.82616	0.608669	-4.64319	3.43e-06	0.000567178
chr15_91116259_91116824	84.5841	-1.32599	0.285638	-4.6422	3.45e-06	0.000569141
chr14_59098419_59098817	19.6839	-2.55214	0.549858	-4.64144	3.46e-06	0.000570452
chr2_160157871_160158436	54.9622	-1.53308	0.330351	-4.64076	3.47e-06	0.000571569
chr13_79936459_79937012	50.7008	-1.62401	0.349986	-4.64021	3.48e-06	0.000572332
chr4_83855071_83855423	28.2277	-2.13696	0.460712	-4.63838	3.51e-06	0.000576658
chr8_144203312_144203696	239.846	1.02349	0.220684	4.6378	3.52e-06	0.000577504
chr2_179125121_179125593	32.969	2.04006	0.440162	4.6348	3.57e-06	0.000585161
chr6_36579770_36580308	185.901	1.06457	0.229825	4.63211	3.62e-06	0.000592048
chr8_78594870_78595268	21.8318	2.67098	0.576737	4.6312	3.64e-06	0.000593859
chr9_132849194_132849745	51.52	1.73138	0.373962	4.62982	3.66e-06	0.000597035
chr16_66007767_66008071	23.3929	-2.29252	0.495499	-4.62669	3.72e-06	0.000605325
chr6_45640074_45640344	41.4391	-1.74006	0.376171	-4.62573	3.73e-06	0.000607342
chr15_58469737_58470290	49.0239	-1.69875	0.367289	-4.62512	3.74e-06	0.000608321
chr5_108531375_108531873	176.656	1.07582	0.232634	4.62453	3.75e-06	0.000609248
chr15_47750456_47750867	32.2359	-1.9352	0.418518	-4.62393	3.77e-06	0.000610237
chr16_71637398_71637847	116.595	-1.16982	0.253152	-4.62103	3.82e-06	0.000618004
chr13_26610323_26610972	74.2886	1.40318	0.303671	4.62074	3.82e-06	0.000618051
chr15_40379896_40380152	35.8405	-1.87668	0.406211	-4.61996	3.84e-06	0.000619574
chr11_72716344_72716658	61.2394	1.53047	0.331535	4.61631	3.91e-06	0.000629752
chr20_53045994_53046403	42.1508	1.78558	0.38696	4.61437	3.94e-06	0.000634056
chrX_27565800_27566382	99.9662	1.33578	0.289483	4.61435	3.94e-06	0.000634056
chr12_124910549_124911194	93.2142	1.27618	0.276615	4.61355	3.96e-06	0.000635678
chr2_125405854_125406080	38.5112	-1.77441	0.384818	-4.61103	4.01e-06	0.000642127
chr2_241302637_241303573	178.004	1.07453	0.233041	4.61091	4.01e-06	0.000642127
chr1_247357021_247357392	45.4841	-1.63973	0.355646	-4.61056	4.02e-06	0.000642365
chr10_110513886_110514187	25.5966	2.35197	0.510613	4.60616	4.1e-06	0.000655262
chr11_28833698_28833982	15.8669	-2.91596	0.633289	-4.60447	4.14e-06	0.000659745
chr1_221432025_221432302	31.0397	2.08582	0.453434	4.60005	4.22e-06	0.000673048
chr21_39451568_39452074	293.506	0.917689	0.19951	4.59972	4.23e-06	0.000673222
chr2_69567191_69567543	67.3061	-1.39235	0.302723	-4.59941	4.24e-06	0.000673355
chr19_4696638_4697018	25.723	-2.21828	0.482563	-4.59687	4.29e-06	0.000679141
chr7_35374841_35375246	228.595	0.981974	0.21362	4.59683	4.29e-06	0.000679141
chr8_42513125_42513677	106.369	1.20086	0.261224	4.59706	4.28e-06	0.000679141
chr12_58364883_58365205	20.1206	-2.61985	0.570016	-4.59611	4.3e-06	0.000680617
chr6_169073307_169073751	23.3986	-2.35054	0.51189	-4.5919	4.39e-06	0.00069297
chr7_70720421_70720909	36.8232	1.98928	0.433223	4.59182	4.39e-06	0.00069297
chr13_103187482_103188102	63.39	1.57509	0.343049	4.59143	4.4e-06	0.000693398
chr3_53796022_53796511	219.367	1.03794	0.226249	4.58758	4.48e-06	0.000705373
chr11_118587984_118588294	32.7729	-2.03736	0.444237	-4.58621	4.51e-06	0.000708555
chr14_23442667_23443220	239.166	0.939183	0.204788	4.58611	4.52e-06	0.000708555
chr1_111346056_111346972	332.408	0.908986	0.1983	4.58389	4.56e-06	0.000714216
chr12_64675891_64676134	77.2723	1.41997	0.309773	4.58389	4.56e-06	0.000714216
chr9_16092689_16093152	34.696	2.02562	0.441923	4.58365	4.57e-06	0.000714216
chr3_186999949_187000206	39.0818	-1.74406	0.380581	-4.58262	4.59e-06	0.00071685
chr18_44887204_44887778	142.517	-1.1338	0.247451	-4.58191	4.61e-06	0.000718361
chr4_176830966_176831325	68.812	1.41346	0.308654	4.57943	4.66e-06	0.000726044
chr15_69760902_69761298	39.1448	-1.79055	0.391056	-4.57876	4.68e-06	0.000726611
chr16_77834396_77834929	33.982	-1.93317	0.422206	-4.57873	4.68e-06	0.000726611
chr14_102474896_102475572	62.2843	1.55064	0.338801	4.57685	4.72e-06	0.000732251
chr11_66118915_66120083	151.085	-1.0897	0.238193	-4.57488	4.76e-06	0.000736766
chr11_126111478_126111997	176.762	1.0857	0.237337	4.57452	4.77e-06	0.000736766
chr12_48125992_48126351	97.0403	1.26432	0.276364	4.57485	4.77e-06	0.000736766
chr17_64679721_64680185	27.0838	-2.17958	0.476439	-4.57473	4.77e-06	0.000736766
chr2_231640630_231641058	66.5123	1.44289	0.315507	4.57325	4.8e-06	0.000740294
chr19_43564102_43564362	27.389	2.30188	0.503504	4.57172	4.84e-06	0.000744806
chr15_33985323_33985722	73.7824	-1.38306	0.302558	-4.57124	4.85e-06	0.000745595
chr7_139915380_139915947	28.8956	-2.04834	0.448184	-4.57032	4.87e-06	0.000747942
chr16_15590517_15591353	93.534	-1.2094	0.26493	-4.56498	5e-06	0.000763408
chr2_168203788_168204545	104.77	1.31157	0.287281	4.56546	4.98e-06	0.000763408
chr22_29622074_29622485	24.5734	-2.21966	0.486191	-4.5654	4.99e-06	0.000763408
chr4_158538262_158538683	20.754	-2.4081	0.527514	-4.565	4.99e-06	0.000763408
chr2_220847521_220848025	30.4486	-1.96626	0.4308	-4.5642	5.01e-06	0.000765323
chr21_33203839_33204410	44.0756	-1.72567	0.378175	-4.56314	5.04e-06	0.000768233
chr3_190533489_190533895	34.1861	-1.85624	0.406836	-4.56262	5.05e-06	0.00076919
chr22_28917775_28918686	219.336	0.945048	0.207192	4.56122	5.09e-06	0.000773404
chr5_9046572_9047370	111.504	-1.18192	0.259165	-4.56049	5.1e-06	0.000775118
chr7_47501406_47501894	85.8604	-1.27625	0.280016	-4.55778	5.17e-06	0.000784228
chr1_31781858_31782980	218.591	0.964575	0.211719	4.55592	5.22e-06	0.000790238
chr20_41482673_41483015	15.5553	-3.3473	0.734817	-4.55529	5.23e-06	0.000791634
chr19_50490975_50491465	79.6696	1.36823	0.300429	4.55424	5.26e-06	0.000793638
chr4_186933610_186934006	97.3719	1.23881	0.272007	4.55435	5.25e-06	0.000793638
chr7_2246240_2246595	35.0822	2.01224	0.441891	4.5537	5.27e-06	0.00079472
chr5_170598583_170599047	68.6226	-1.3602	0.299131	-4.54716	5.44e-06	0.000818802
chr2_207334592_207335363	143.175	-1.11417	0.245063	-4.54647	5.46e-06	0.000820475
chr3_187403682_187404195	26.9217	-2.11034	0.464284	-4.54535	5.48e-06	0.000823845
chr4_101174696_101174995	39.2643	1.83116	0.402916	4.54478	5.5e-06	0.000825084
chr10_110509971_110510551	68.6345	1.4081	0.30987	4.54417	5.52e-06	0.000826462
chr16_88304051_88304857	144.148	-1.04424	0.229886	-4.54244	5.56e-06	0.00083219
chr20_57439437_57439722	58.58	1.54595	0.340352	4.54221	5.57e-06	0.00083219
chr2_45914_47568	209.13	-0.938872	0.206758	-4.54093	5.6e-06	0.00083623
chr2_226600727_226601121	31.9123	2.02561	0.446125	4.54045	5.61e-06	0.000837102
chr5_151718694_151718971	19.4414	-2.87575	0.633397	-4.5402	5.62e-06	0.000837114
chr1_47409137_47409872	244.348	-0.938453	0.206711	-4.53993	5.63e-06	0.00083718
chr18_46155607_46155939	19.9144	-2.46123	0.54268	-4.53533	5.75e-06	0.000854576
chr17_61366332_61367355	280.164	0.902704	0.199085	4.53427	5.78e-06	0.000857865
chr20_50130939_50131486	158.109	1.07081	0.236203	4.53345	5.8e-06	0.000860171
chr9_130371617_130372406	68.4841	-1.36556	0.301302	-4.53221	5.84e-06	0.000864169
chr4_144377000_144377469	27.7742	2.2545	0.497527	4.53141	5.86e-06	0.000866431
chr4_187478573_187479199	47.0195	-1.62561	0.358802	-4.53066	5.88e-06	0.000867436
chr7_5693592_5693865	241.424	0.912824	0.201475	4.53071	5.88e-06	0.000867436
chr16_2973250_2973383	28.3991	2.17264	0.479641	4.52972	5.91e-06	0.000870261
chr15_73154481_73154737	22.3339	2.63918	0.582717	4.52909	5.92e-06	0.000871804
chr2_7210027_7210489	41.3518	-1.72523	0.381139	-4.52652	6e-06	0.000881441
chr7_107220204_107221292	162.837	-1.08141	0.238951	-4.52568	6.02e-06	0.00088389
chr6_109079905_109080315	61.351	1.5175	0.335459	4.52364	6.08e-06	0.000891395
chr18_8859155_8859498	18.4844	-2.57355	0.568969	-4.52318	6.09e-06	0.000892247
chr1_175015148_175015564	19.5533	-2.49389	0.551485	-4.52214	6.12e-06	0.000895582
chr9_87381471_87381734	14.8968	-2.95698	0.654184	-4.52011	6.18e-06	0.000903155
chr1_212614056_212614249	35.3947	1.95225	0.432092	4.51814	6.24e-06	0.000910541
chr15_101358846_101359636	125.406	-1.08424	0.24008	-4.51616	6.3e-06	0.000917985
chr10_95247265_95247593	39.4083	-1.73885	0.385239	-4.51369	6.37e-06	0.000925932
chr20_25237743_25238222	83.5534	-1.24254	0.275289	-4.51358	6.37e-06	0.000925932
chr8_13165409_13166005	45.8155	1.67652	0.371432	4.51367	6.37e-06	0.000925932
chr10_124674744_124675245	64.1344	1.43882	0.318838	4.51268	6.4e-06	0.000928771
chr6_158488131_158488474	28.4962	-2.06063	0.456804	-4.51096	6.45e-06	0.000935237
chr20_23270426_23270933	43.1469	-1.6647	0.369055	-4.51069	6.46e-06	0.000935329
chr8_126896241_126896688	21.6292	-2.37154	0.5259	-4.50948	6.5e-06	0.000939582
chr3_50285992_50286238	33.3217	-1.85692	0.412218	-4.50469	6.65e-06	0.000959922
chr1_52005573_52005908	23.5983	-2.29035	0.508509	-4.50404	6.67e-06	0.000961715
chr15_68543184_68543905	71.1687	-1.34773	0.299317	-4.50268	6.71e-06	0.000966789
chr2_21290060_21290479	39.9815	-1.78543	0.396719	-4.50048	6.78e-06	0.000975705
chr1_151311568_151311945	59.112	-1.46389	0.325318	-4.49987	6.8e-06	0.000976239
chr1_183228466_183229372	106.338	1.18701	0.263778	4.50005	6.79e-06	0.000976239
chr3_197854954_197855443	77.8961	-1.28664	0.285991	-4.49889	6.83e-06	0.00097958
chr12_49914009_49914824	167.468	1.05562	0.234693	4.49788	6.86e-06	0.000983136
chr6_46925630_46925900	17.3028	-2.70222	0.600912	-4.49687	6.9e-06	0.000985322
chr8_81374823_81375405	42.2679	1.79074	0.398236	4.49666	6.9e-06	0.000985322
chr8_117731468_117731967	30.9863	-1.9877	0.441996	-4.4971	6.89e-06	0.000985322
chr1_209839814_209840515	63.5792	-1.38593	0.308251	-4.49611	6.92e-06	0.000985859
chr17_7047017_7047390	46.5702	1.65569	0.368253	4.49606	6.92e-06	0.000985859
chr7_33692919_33693376	20.0653	-2.53339	0.563562	-4.49532	6.95e-06	0.000988147
chr6_44783084_44783651	99.712	1.21973	0.271394	4.49432	6.98e-06	0.000990999
chr6_55351256_55351696	26.2226	2.25581	0.501937	4.49421	6.98e-06	0.000990999
chr9_69758400_69758690	44.6341	1.68887	0.375883	4.49309	7.02e-06	0.000993964
chr9_100429365_100429655	52.7156	-1.55714	0.346553	-4.49322	7.02e-06	0.000993964
chr7_105153710_105154410	119.233	1.13533	0.252701	4.49277	7.03e-06	0.000994284
chr13_41606509_41607063	70.4206	1.38176	0.30765	4.49133	7.08e-06	0.000999907
chr9_121557560_121558410	162.576	1.02755	0.228886	4.48935	7.14e-06	0.00100807
chr11_11813331_11813594	42.0985	-1.66899	0.371807	-4.48887	7.16e-06	0.00100923
chr18_6682489_6683135	189.168	0.988553	0.220289	4.48754	7.21e-06	0.00101438
chr1_61052890_61053211	48.632	1.62239	0.361573	4.48703	7.22e-06	0.00101563
chr8_21745044_21745454	45.0685	1.66485	0.371086	4.48644	7.24e-06	0.0010167
chr8_115555537_115555768	22.2063	2.49947	0.55713	4.48632	7.25e-06	0.0010167
chr6_131976538_131976978	45.2175	-1.61823	0.360824	-4.48481	7.3e-06	0.00102276
chr8_97232106_97232876	159.711	1.03446	0.230692	4.48413	7.32e-06	0.00102486
chr11_94152329_94152756	58.7505	-1.43298	0.3196	-4.48367	7.34e-06	0.00102594
chr19_39001030_39001475	100.85	1.21422	0.270889	4.48237	7.38e-06	0.00103104
chr4_182536304_182536626	61.9148	1.59068	0.354899	4.48207	7.39e-06	0.0010313
chr10_82982109_82982643	25.4965	-2.16584	0.483372	-4.48068	7.44e-06	0.00103688
chr5_64946929_64947521	220.589	1.11092	0.247986	4.47979	7.47e-06	0.00104006
chr12_21774415_21775130	199.298	1.0717	0.239247	4.47948	7.48e-06	0.00104036
chr1_68384413_68384844	29.4551	-2.09358	0.467461	-4.47862	7.51e-06	0.00104223
chr3_111961716_111962306	85.819	1.3259	0.296042	4.47876	7.51e-06	0.00104223
chr4_91243054_91243655	59.6661	1.50748	0.336668	4.47764	7.55e-06	0.00104467
chr7_37100548_37101413	120.146	1.11296	0.248552	4.47778	7.54e-06	0.00104467
chr14_50000170_50001034	169.272	1.02611	0.229186	4.47719	7.56e-06	0.00104568
chr15_40330315_40330767	238.463	0.951226	0.212475	4.47688	7.57e-06	0.00104605
chr1_74363118_74363676	177.031	1.0225	0.228486	4.47509	7.64e-06	0.00105136
chr17_50904555_50905204	87.1809	1.26485	0.282642	4.47508	7.64e-06	0.00105136
chr20_1844555_1845549	85.2378	1.2964	0.289688	4.47515	7.64e-06	0.00105136
chr1_236066869_236067318	177.2	0.993653	0.22207	4.47449	7.66e-06	0.00105307
chr5_10551306_10551754	37.5409	-1.80479	0.403446	-4.47343	7.7e-06	0.00105716
chr11_19172804_19173966	138.456	1.15786	0.25886	4.47291	7.72e-06	0.00105736
chr2_189602276_189602575	22.7275	2.44308	0.546183	4.473	7.71e-06	0.00105736
chr2_111160814_111161109	33.7181	-1.92498	0.430533	-4.47116	7.78e-06	0.00106487
chr1_15151449_15151666	23.2119	2.43215	0.544125	4.46984	7.83e-06	0.00107001
chr10_121921382_121921971	79.8511	1.29328	0.289378	4.46918	7.85e-06	0.00107001
chr2_96584124_96584393	41.5138	-1.84477	0.412755	-4.46941	7.84e-06	0.00107001
chr4_108043412_108043890	34.1164	1.98182	0.443416	4.46944	7.84e-06	0.00107001
chr16_24700769_24701334	52.5932	-1.50582	0.336978	-4.4686	7.87e-06	0.00107058
chr4_71251249_71251654	24.5594	-2.20009	0.49232	-4.46881	7.87e-06	0.00107058
chr10_129568707_129569528	185.142	1.00367	0.22468	4.46711	7.93e-06	0.00107229
chr13_30743498_30743972	33.5335	-1.83964	0.411815	-4.46715	7.93e-06	0.00107229
chr2_16155854_16156185	45.9383	1.67812	0.375633	4.46745	7.92e-06	0.00107229
chr2_216373558_216373853	21.8426	-2.30453	0.515891	-4.46708	7.93e-06	0.00107229
chr4_112523813_112524304	55.1078	1.5961	0.357228	4.46801	7.9e-06	0.00107229
chr2_102122157_102122443	26.1394	-2.15846	0.483297	-4.46611	7.97e-06	0.001076
chr11_101444036_101444484	34.5271	1.96099	0.43919	4.46502	8.01e-06	0.00107793
chr15_50910542_50910798	20.9261	-2.40612	0.538854	-4.46524	8e-06	0.00107793
chr2_239953428_239953990	178.232	1.07387	0.24049	4.46534	7.99e-06	0.00107793
chr9_31574077_31574654	27.6535	-2.19341	0.491338	-4.46415	8.04e-06	0.00108112
chr2_207258382_207259009	33.1533	-1.88123	0.421432	-4.4639	8.05e-06	0.00108124
chr1_170145776_170146495	53.3208	-1.49476	0.334907	-4.46319	8.07e-06	0.00108362
chr1_74811341_74811885	29.4839	2.15933	0.483909	4.46226	8.11e-06	0.00108716
chr5_147782330_147782973	99.6217	1.28135	0.28719	4.46167	8.13e-06	0.00108896
chr12_121762243_121762844	326.316	0.876443	0.196507	4.46011	8.19e-06	0.00109456
chr3_79339392_79339772	23.8557	2.39498	0.536969	4.46018	8.19e-06	0.00109456
chr22_34914783_34915494	47.2281	-1.61299	0.361772	-4.45858	8.25e-06	0.00110123
chr8_143529332_143529831	102.986	1.20698	0.270752	4.45789	8.28e-06	0.00110357
chr1_119987114_119987395	19.6304	-2.46904	0.55399	-4.45683	8.32e-06	0.00110546
chr1_230136367_230136976	65.9054	1.45299	0.326014	4.45683	8.32e-06	0.00110546
chr2_150089961_150090386	62.2924	1.48835	0.333924	4.45715	8.31e-06	0.00110546
chr1_203290257_203290945	249.722	0.903211	0.202682	4.45629	8.34e-06	0.00110701
chr18_45932730_45933186	50.3044	1.5977	0.358545	4.45607	8.35e-06	0.00110701
chr7_129751758_129752311	93.715	1.23695	0.277606	4.45577	8.36e-06	0.00110736
chr9_133075859_133076261	35.6717	-1.7697	0.397213	-4.45528	8.38e-06	0.00110869
chr22_37563272_37563557	29.6233	-2.07062	0.465127	-4.45173	8.52e-06	0.00112596
chr12_67772681_67773187	367.281	0.869346	0.195303	4.45126	8.54e-06	0.00112723
chr4_79652259_79652581	20.9944	-2.69919	0.606473	-4.45063	8.56e-06	0.00112933
chr5_172659773_172660583	321.564	0.842711	0.189503	4.44696	8.71e-06	0.00114757
chr2_49569286_49569578	21.1311	-2.32489	0.523058	-4.4448	8.8e-06	0.00115671
chr22_42304055_42304586	62.7524	1.44793	0.325753	4.44487	8.79e-06	0.00115671
chr22_38881393_38882078	80.3556	1.33595	0.300659	4.4434	8.85e-06	0.00116298
chr6_3522587_3523194	36.9163	-1.73851	0.391361	-4.44222	8.9e-06	0.00116814
chr1_201904542_201905039	256.977	0.942754	0.212277	4.44115	8.95e-06	0.00117275
chr3_132382775_132383522	59.4698	1.46916	0.330892	4.43999	9e-06	0.00117784
chr12_103269907_103270314	24.1525	-2.201	0.495805	-4.43925	9.03e-06	0.0011806
chr22_44698604_44699455	140.31	-1.03499	0.233188	-4.43844	9.06e-06	0.00118382
chr9_589778_590134	50.7639	-1.5058	0.339512	-4.4352	9.2e-06	0.00120049
chr15_90143260_90143718	160.377	1.04823	0.236384	4.43443	9.23e-06	0.00120351
chr10_8279426_8279776	30.4349	-1.90121	0.42883	-4.43349	9.27e-06	0.00120625
chr8_127907853_127908217	28.9809	-1.96498	0.443204	-4.43357	9.27e-06	0.00120625
chr7_102260715_102261263	246.804	0.915417	0.206502	4.43296	9.29e-06	0.00120791
chr5_5325830_5326732	83.2663	-1.24479	0.280819	-4.4327	9.31e-06	0.00120809
chr1_31647093_31647431	45.7361	-1.58524	0.357785	-4.43072	9.39e-06	0.00121798
chr1_58883907_58884168	35.672	1.84533	0.416541	4.43013	9.42e-06	0.00122004
chr4_186932228_186932491	41.7613	1.82374	0.411697	4.42982	9.43e-06	0.00122053
chr17_12530168_12530556	42.9817	1.70313	0.384538	4.42903	9.47e-06	0.0012237
chr4_57053498_57053912	37.0282	-1.77794	0.401826	-4.42465	9.66e-06	0.00124751
chr12_66970873_66971176	21.301	2.49975	0.56526	4.4223	9.77e-06	0.00125982
chr5_108216791_108217275	47.4599	1.6766	0.379166	4.42182	9.79e-06	0.00126128
chr5_72183944_72184358	59.4887	-1.49464	0.338033	-4.42157	9.8e-06	0.00126141
chr2_216426904_216427346	40.2191	-1.68602	0.381362	-4.42106	9.82e-06	0.00126313
chr13_71305683_71306015	31.9093	2.08134	0.470824	4.42064	9.84e-06	0.00126423
chr2_118738617_118739019	47.376	-1.55388	0.351684	-4.41839	9.94e-06	0.00127613
chr14_51442617_51443097	24.217	-2.22483	0.503574	-4.41808	9.96e-06	0.00127665
chr10_110508353_110508719	65.3437	1.42921	0.323583	4.41682	1e-05	0.00128275
chr1_221431428_221431937	95.6767	1.24971	0.283021	4.4156	1.01e-05	0.00128867
chr18_21826171_21826546	77.0186	1.31771	0.298494	4.41453	1.01e-05	0.00129371
chr12_13124898_13125484	36.9608	-1.71015	0.387428	-4.41411	1.01e-05	0.00129377
chr8_28693904_28694497	24.4408	2.36662	0.53618	4.41385	1.02e-05	0.00129377
chrX_50770572_50771270	86.8409	1.24583	0.282248	4.41396	1.01e-05	0.00129377
chr4_94452589_94452958	191.522	0.969193	0.21962	4.41304	1.02e-05	0.00129728
chr11_32137130_32137622	28.7299	-1.97183	0.446856	-4.41268	1.02e-05	0.0012981
chr3_23611830_23612554	129.535	1.09756	0.248749	4.41234	1.02e-05	0.00129882
chr3_19961979_19962334	68.2505	1.38349	0.313593	4.41172	1.03e-05	0.00130119
chr2_79723753_79724142	24.79	-2.27918	0.516706	-4.41098	1.03e-05	0.00130435
chr3_59327280_59327833	26.0131	-2.10227	0.476666	-4.41036	1.03e-05	0.0013051
chr4_156476326_156476681	21.8188	-2.26934	0.514524	-4.41057	1.03e-05	0.0013051
chr6_31877505_31877999	85.5706	1.25024	0.28349	4.41018	1.03e-05	0.0013051
chr17_65703923_65704258	28.8627	2.12888	0.482783	4.4096	1.04e-05	0.00130729
chr12_49905920_49906203	37.136	1.92183	0.435886	4.40902	1.04e-05	0.00130946
chr5_170388833_170389770	139.303	1.10937	0.251701	4.40748	1.05e-05	0.00131743
chr3_38711324_38711693	33.2267	-1.84148	0.417927	-4.40624	1.05e-05	0.00132368
chr8_133033271_133033790	49.2228	-1.5197	0.344949	-4.40559	1.05e-05	0.00132627
chr15_52261342_52262138	146.994	1.12999	0.25661	4.40352	1.07e-05	0.00133764
chrX_149152362_149152728	14.9608	-2.83795	0.644585	-4.40276	1.07e-05	0.00134098
chr9_123446053_123446637	48.8723	-1.53062	0.347673	-4.40248	1.07e-05	0.00134135
chr9_130630789_130631436	122.2	1.08809	0.247176	4.40208	1.07e-05	0.00134243
chr3_177459430_177459772	60.4386	-1.44933	0.329276	-4.40156	1.07e-05	0.0013443
chr10_102401744_102402120	77.5534	-1.25422	0.285019	-4.40047	1.08e-05	0.00134698
chr11_65006733_65007189	38.9207	-1.68617	0.383147	-4.40084	1.08e-05	0.00134698
chr17_48503493_48504211	200.134	0.952169	0.216374	4.40057	1.08e-05	0.00134698
chr9_131481579_131481948	32.6519	1.98119	0.450283	4.39989	1.08e-05	0.00134922
chr15_69557425_69557750	28.1565	-2.02666	0.460696	-4.39912	1.09e-05	0.00135266
chr2_215460687_215461146	37.2445	-1.69686	0.385767	-4.39867	1.09e-05	0.0013541
chr13_29046742_29047060	34.5834	1.86765	0.424743	4.39712	1.1e-05	0.00136243
chr3_111904773_111905065	36.1727	-1.7285	0.393156	-4.39647	1.1e-05	0.00136514
chr12_52813922_52814918	89.9726	-1.17371	0.267002	-4.39587	1.1e-05	0.00136717
chr19_19900290_19900435	27.2495	2.13144	0.484914	4.39549	1.11e-05	0.00136717
chr5_157563765_157564513	165.702	0.988765	0.224947	4.39554	1.1e-05	0.00136717
chr3_71694369_71694667	13.7284	-3.09066	0.703248	-4.39484	1.11e-05	0.00136854
chr8_133722902_133723302	24.5109	-2.13562	0.485921	-4.39501	1.11e-05	0.00136854
chr1_23371166_23371312	39.9146	1.75174	0.398635	4.39434	1.11e-05	0.0013703
chr3_44939387_44939968	62.6531	1.42144	0.323592	4.39268	1.12e-05	0.00137941
chr15_69595064_69595897	113.354	-1.09239	0.248818	-4.39032	1.13e-05	0.00139174
chr6_89585256_89585448	28.7654	-1.92969	0.439523	-4.39041	1.13e-05	0.00139174
chr11_112157243_112157691	37.0044	-1.70272	0.38798	-4.38867	1.14e-05	0.00140091
chr6_36590317_36590557	38.4924	-1.67525	0.381767	-4.38814	1.14e-05	0.00140291
chr10_110636904_110637904	331.628	0.871719	0.198789	4.38516	1.16e-05	0.00141807
chr17_74647941_74648820	137.263	-1.03513	0.236047	-4.38527	1.16e-05	0.00141807
chr7_471787_472427	94.156	-1.23158	0.280824	-4.38558	1.16e-05	0.00141807
chr12_93299328_93299772	51.8124	1.53133	0.349248	4.38467	1.16e-05	0.00141984
chr14_102795542_102795947	39.5152	-1.74778	0.398747	-4.38319	1.17e-05	0.00142768
chr18_8800465_8800825	39.901	-1.72957	0.394606	-4.38304	1.17e-05	0.00142768
chr15_28095869_28096587	168.536	0.983084	0.224319	4.38253	1.17e-05	0.00142959
chr2_97727972_97728433	64.4348	1.38323	0.315821	4.37979	1.19e-05	0.00144625
chrX_48472848_48473373	37.9698	1.79835	0.410645	4.37932	1.19e-05	0.00144793
chr10_6748884_6749205	18.7931	-2.56212	0.585145	-4.3786	1.19e-05	0.00145135
chr3_60269389_60269764	15.3668	-2.75808	0.629979	-4.37806	1.2e-05	0.0014535
chr11_128759627_128760007	23.3376	-2.21832	0.506953	-4.37579	1.21e-05	0.00146724
chr3_116005360_116005845	93.2567	-1.33965	0.306303	-4.37359	1.22e-05	0.00148067
chr6_124823431_124824000	67.1405	1.36624	0.312545	4.37133	1.23e-05	0.00149464
chr16_24221314_24221597	23.9832	-2.16068	0.494373	-4.37055	1.24e-05	0.00149848
chr1_85607174_85607669	57.4762	-1.42866	0.326959	-4.36954	1.25e-05	0.00150396
chr16_86609141_86609551	28.1557	-2.06201	0.472037	-4.36834	1.25e-05	0.0015108
chr3_193057628_193058176	54.0265	1.49481	0.342266	4.36739	1.26e-05	0.0015159
chr7_71244029_71244526	63.3698	-1.38329	0.316886	-4.36526	1.27e-05	0.00152924
chr15_95971770_95972701	88.6425	1.21986	0.279471	4.36489	1.27e-05	0.00153036
chr9_7901604_7902146	42.076	1.76192	0.403685	4.36458	1.27e-05	0.00153101
chr11_45563803_45564420	77.8704	1.27952	0.293181	4.36426	1.28e-05	0.00153169
chr17_37813667_37814212	33.3302	-1.79767	0.411936	-4.36396	1.28e-05	0.00153169
chr2_117714199_117714499	46.3751	1.61326	0.369687	4.36384	1.28e-05	0.00153169
chr4_185920957_185921302	40.1129	1.76187	0.403871	4.36246	1.29e-05	0.00153994
chr2_64453239_64453561	52.4173	-1.47863	0.339034	-4.3613	1.29e-05	0.00154663
chr8_11742485_11743158	296.107	0.861426	0.197587	4.35973	1.3e-05	0.0015562
chr14_105294100_105294620	221.606	0.91487	0.209875	4.35911	1.31e-05	0.00155876
chr17_72192416_72193038	44.9175	-1.54413	0.354243	-4.35895	1.31e-05	0.00155876
chr1_159040300_159040543	14.8265	-2.80371	0.643334	-4.3581	1.31e-05	0.00156183
chr3_141646810_141647055	48.1203	1.58244	0.363091	4.35823	1.31e-05	0.00156183
chr1_17531685_17532449	215.644	0.973439	0.223377	4.35784	1.31e-05	0.00156219
chr6_89950820_89951435	43.6546	-1.58399	0.363651	-4.35579	1.33e-05	0.00157532
chr1_218496666_218496988	32.8932	-1.79783	0.412793	-4.35528	1.33e-05	0.00157598
chr14_102046260_102046741	313.263	0.903469	0.207437	4.35538	1.33e-05	0.00157598
chr14_53463122_53463761	42.4361	1.6757	0.38482	4.3545	1.33e-05	0.00158008
chr11_12185918_12186216	105.534	1.24876	0.286803	4.35407	1.34e-05	0.00158168
chr10_25405889_25406211	19.4357	-2.42649	0.55756	-4.35198	1.35e-05	0.00159408
chr2_166375457_166376554	409.463	0.854574	0.196367	4.35193	1.35e-05	0.00159408
chr9_31304592_31304923	18.0031	-2.6038	0.59851	-4.35046	1.36e-05	0.00160329
chr16_77298655_77299116	26.9663	-2.05637	0.472808	-4.34928	1.37e-05	0.00161044
chr6_157406037_157406494	38.1527	-1.67677	0.385667	-4.34771	1.38e-05	0.00162046
chr1_201368743_201369851	233.541	0.896947	0.206339	4.34697	1.38e-05	0.00162284
chr5_86143807_86144206	116.552	1.12025	0.257697	4.34717	1.38e-05	0.00162284
chr1_21909538_21910325	442.646	0.813061	0.187105	4.34548	1.39e-05	0.00163231
chr15_72226668_72226993	175.497	1.01349	0.233287	4.34441	1.4e-05	0.0016387
chr8_129202381_129202738	62.9166	-1.33561	0.307539	-4.34291	1.41e-05	0.00164839
chr1_167685903_167686204	94.5644	1.17766	0.271212	4.34219	1.41e-05	0.00165104
chr2_27088759_27088937	44.7577	1.65398	0.380915	4.34213	1.41e-05	0.00165104
chr22_42635526_42635942	41.0778	-1.70601	0.392914	-4.34193	1.41e-05	0.00165104
chr3_156762603_156763088	38.1927	1.7829	0.410772	4.34036	1.42e-05	0.00166131
chr18_6672893_6673607	37.1106	1.76394	0.406441	4.33997	1.43e-05	0.00166268
chr4_92305233_92306240	201.091	0.953091	0.219643	4.33927	1.43e-05	0.00166643
chr4_175419173_175419766	30.6962	-1.90667	0.439509	-4.33817	1.44e-05	0.00167268
chr7_138186956_138187340	34.3017	-1.79436	0.413635	-4.33803	1.44e-05	0.00167268
chr16_30457292_30457700	76.5867	1.29554	0.298728	4.33685	1.45e-05	0.00168011
chr11_11584479_11584723	26.3765	-2.0092	0.463365	-4.3361	1.45e-05	0.00168379
chr13_26475794_26476877	97.0808	-1.14184	0.263342	-4.33595	1.45e-05	0.00168379
chr9_127360646_127361153	82.8865	1.2429	0.28677	4.33413	1.46e-05	0.00169621
chr1_151989602_151989828	21.8106	-2.20283	0.508381	-4.33304	1.47e-05	0.00169829
chr4_95193161_95194240	196.729	0.928167	0.214203	4.33312	1.47e-05	0.00169829
chr5_171891120_171891575	48.0201	1.57801	0.364157	4.33332	1.47e-05	0.00169829
chrX_10450628_10450889	13.9612	-3.0293	0.699063	-4.33337	1.47e-05	0.00169829
chr12_104027769_104028212	35.0524	1.86073	0.429468	4.33263	1.47e-05	0.00169984
chr15_90191787_90192514	117.566	1.10696	0.255516	4.33224	1.48e-05	0.00170122
chr3_179108166_179108554	19.233	-2.44836	0.56521	-4.33177	1.48e-05	0.0017033
chr11_76574398_76574837	45.5781	-1.53152	0.353633	-4.33082	1.49e-05	0.00170904
chr16_20166599_20167098	46.1289	-1.55186	0.358378	-4.33024	1.49e-05	0.00171159
chr2_23426410_23426862	58.5101	-1.41835	0.327574	-4.32988	1.49e-05	0.00171159
chr4_168816613_168817152	195.763	0.958921	0.221476	4.32967	1.49e-05	0.00171159
chr7_112435105_112435622	30.7097	-1.95381	0.451251	-4.32977	1.49e-05	0.00171159
chr8_47826615_47826963	71.6062	1.32751	0.306702	4.32832	1.5e-05	0.00172052
chr5_167699411_167699847	153.048	-0.995038	0.229972	-4.32678	1.51e-05	0.00173101
chr16_50603326_50603979	65.1048	1.41298	0.326627	4.32598	1.52e-05	0.00173568
chr18_48813816_48814366	61.4418	1.40215	0.324163	4.32545	1.52e-05	0.00173824
chr2_41963706_41963987	21.6679	-2.20081	0.508841	-4.32514	1.52e-05	0.00173906
chr14_68924390_68924900	275.263	0.845261	0.195473	4.32419	1.53e-05	0.00174501
chr2_122061232_122061523	24.2863	-2.12216	0.490998	-4.32214	1.55e-05	0.00175964
chr7_150629375_150629915	206.253	0.94338	0.218295	4.32158	1.55e-05	0.00176218
chr8_47857566_47858103	226.856	0.921904	0.213334	4.32142	1.55e-05	0.00176218
chr19_11089267_11089646	143.984	1.0077	0.233211	4.32099	1.55e-05	0.00176396
chr12_31989591_31990378	51.786	-1.45359	0.336496	-4.31978	1.56e-05	0.0017704
chr2_48145943_48146370	106.642	1.19757	0.277218	4.31994	1.56e-05	0.0017704
chr3_138125565_138126226	80.8569	1.28079	0.296569	4.3187	1.57e-05	0.00177662
chr6_126919947_126920191	17.0027	-2.57174	0.595502	-4.3186	1.57e-05	0.00177662
chr12_52063394_52063537	35.1927	1.85635	0.429894	4.31816	1.57e-05	0.00177858
chr21_30408717_30409162	80.209	1.31383	0.304285	4.31774	1.58e-05	0.00178028
chr1_25774997_25775635	149.148	1.0034	0.232414	4.31731	1.58e-05	0.00178215
chr9_7192312_7192655	19.1415	2.95879	0.685391	4.31693	1.58e-05	0.00178356
chr7_157310080_157310414	25.4408	-2.05041	0.474995	-4.31671	1.58e-05	0.00178375
chr3_127768406_127768931	30.0844	-1.86328	0.431779	-4.31537	1.59e-05	0.00179295
chr1_106278726_106279085	17.124	-2.65464	0.61561	-4.31221	1.62e-05	0.00181622
chr1_116405085_116405751	125.851	1.05103	0.243798	4.31105	1.62e-05	0.00181622
chr2_54969274_54970218	144.043	1.01818	0.236165	4.31132	1.62e-05	0.00181622
chr2_220676628_220677222	77.769	1.26102	0.292475	4.31156	1.62e-05	0.00181622
chr2_221997179_221997629	29.7926	-1.96967	0.456882	-4.31113	1.62e-05	0.00181622
chr22_45246144_45246692	73.6228	-1.24417	0.288591	-4.31118	1.62e-05	0.00181622
chr4_91092384_91092947	37.3766	1.80434	0.418452	4.31194	1.62e-05	0.00181622
chr6_142238806_142239313	64.3856	1.36363	0.31632	4.31091	1.63e-05	0.00181622
chr3_8370993_8371665	33.0173	-1.90608	0.442215	-4.31031	1.63e-05	0.00181955
chr22_42683416_42684087	192.577	0.934348	0.216786	4.30999	1.63e-05	0.00182051
chr18_75489828_75490071	19.0166	-2.43282	0.564534	-4.30943	1.64e-05	0.00182347
chr10_31940888_31941181	22.3599	-2.18677	0.507478	-4.30909	1.64e-05	0.00182461
chr3_186846762_186847258	49.7837	1.54116	0.357705	4.30848	1.64e-05	0.00182802
chr8_97196865_97197417	146.685	1.01593	0.235874	4.30709	1.65e-05	0.00183792
chr19_55113586_55114061	184.397	0.987162	0.229213	4.30675	1.66e-05	0.00183904
chr7_84729300_84729689	26.6104	-2.16048	0.50183	-4.3052	1.67e-05	0.00185035
chr15_43122679_43123548	364.141	0.812017	0.188639	4.3046	1.67e-05	0.00185368
chr11_77672382_77672618	25.5072	-2.03335	0.472417	-4.30414	1.68e-05	0.00185583
chr2_109242885_109243313	33.9843	-1.74809	0.406286	-4.30259	1.69e-05	0.0018672
chr13_72151238_72151568	22.3271	-2.19044	0.509154	-4.30212	1.69e-05	0.00186854
chr17_40099038_40099510	150.835	-1.01135	0.235085	-4.30204	1.69e-05	0.00186854
chr1_7401845_7402193	44.1262	-1.56068	0.362906	-4.3005	1.7e-05	0.00187987
chr11_47234050_47235507	174.18	0.955726	0.222248	4.30028	1.71e-05	0.00188008
chr4_57102049_57102455	147.045	1.02974	0.239562	4.29843	1.72e-05	0.0018941
chr7_4784619_4785158	148.873	1.00408	0.233617	4.29795	1.72e-05	0.0018965
chr3_36814216_36814814	93.9827	1.18642	0.276099	4.2971	1.73e-05	0.00190213
chr11_95692442_95692868	19.5855	-2.52142	0.586952	-4.29579	1.74e-05	0.00191167
chr3_81864324_81864796	51.315	1.5424	0.359078	4.29544	1.74e-05	0.00191296
chr1_58282665_58283046	80.0674	1.24639	0.290336	4.29293	1.76e-05	0.00192961
chr7_5700002_5700282	91.1881	1.22058	0.284321	4.29296	1.76e-05	0.00192961
chr8_95536465_95536786	34.7762	1.9254	0.448478	4.2932	1.76e-05	0.00192961
chr8_116995466_116995959	62.4343	1.40574	0.327512	4.29219	1.77e-05	0.00193435
chr4_41096029_41096318	21.6501	-2.23598	0.520988	-4.29181	1.77e-05	0.00193591
chr7_105907121_105907583	113.053	1.10295	0.257041	4.29097	1.78e-05	0.00194157
chr10_102632704_102633118	162.531	0.975128	0.227285	4.29034	1.78e-05	0.00194538
chr5_150469677_150469923	26.4106	-1.99787	0.46577	-4.28939	1.79e-05	0.00195192
chr14_95265429_95266009	63.1872	-1.33269	0.310744	-4.28869	1.8e-05	0.00195464
chr18_23779670_23780440	139.267	-1.04693	0.244112	-4.28874	1.8e-05	0.00195464
chr11_65493918_65494163	47.7193	-1.51311	0.353008	-4.28634	1.82e-05	0.0019737
chr10_132418705_132419296	118.002	1.10263	0.257309	4.28525	1.83e-05	0.0019817
chr1_43005713_43006359	81.7555	1.22856	0.286789	4.28383	1.84e-05	0.00198297
chr13_51557900_51558509	42.6164	-1.60801	0.37536	-4.28392	1.84e-05	0.00198297
chr17_45092797_45093369	210.652	-0.9024	0.210632	-4.28424	1.83e-05	0.00198297
chr3_102736436_102737500	149.66	1.01972	0.238032	4.28396	1.84e-05	0.00198297
chr5_54514404_54514584	27.8711	2.07753	0.484981	4.28374	1.84e-05	0.00198297
chr9_21576219_21576834	35.2972	-1.71352	0.399985	-4.28396	1.84e-05	0.00198297
chr9_76256056_76256427	27.3839	-1.94162	0.453192	-4.28432	1.83e-05	0.00198297
chr3_12922268_12922710	60.3057	1.39392	0.325454	4.28299	1.84e-05	0.00198789
chr12_63045049_63045665	30.3465	-1.85439	0.43307	-4.28197	1.85e-05	0.00199198
chr12_71556936_71557259	33.808	-1.73836	0.405991	-4.28176	1.85e-05	0.00199198
chr13_27500837_27501058	38.196	1.74601	0.407734	4.28223	1.85e-05	0.00199198
chr7_106425039_106425553	43.5176	-1.5692	0.366485	-4.28176	1.85e-05	0.00199198
chr12_49975247_49975752	98.1871	1.25087	0.292208	4.28076	1.86e-05	0.00199748
chr8_9295167_9295707	80.4333	1.22648	0.286506	4.28082	1.86e-05	0.00199748
chr1_39293427_39293754	52.682	-1.47141	0.343772	-4.28018	1.87e-05	0.00200092
chr3_144369040_144369772	46.5032	1.58172	0.369591	4.27964	1.87e-05	0.00200402
chr1_29974324_29974832	31.2348	-1.84181	0.430467	-4.27864	1.88e-05	0.00201132
chr2_219687350_219687631	34.0951	1.82505	0.426578	4.27836	1.88e-05	0.00201216
chr13_20362452_20362745	78.6507	1.28147	0.299643	4.27665	1.9e-05	0.00202586
chr1_1434312_1434763	71.7304	1.33896	0.313106	4.27638	1.9e-05	0.00202661
chr12_5167023_5167394	36.3833	-1.7033	0.39837	-4.27567	1.91e-05	0.00203132
chr6_119384566_119384902	22.3597	2.32923	0.544819	4.27525	1.91e-05	0.00203339
chr2_88601385_88601702	40.3729	1.69439	0.396426	4.27417	1.92e-05	0.00204149
chr6_112258857_112259865	229.131	0.91827	0.214876	4.2735	1.92e-05	0.00204588
chr5_132211902_132212224	43.5752	-1.68013	0.393208	-4.27286	1.93e-05	0.00204995
chr11_126594904_126595454	76.2643	1.25703	0.294246	4.27205	1.94e-05	0.00205569
chr16_2835739_2836293	78.4534	-1.2104	0.28337	-4.27144	1.94e-05	0.00205957
chr6_29676858_29677613	136.545	1.01015	0.236507	4.27112	1.94e-05	0.00206067
chrX_71053197_71053643	49.1276	1.59289	0.373008	4.27039	1.95e-05	0.00206565
chr10_28783165_28783474	27.7899	-1.94518	0.455624	-4.26927	1.96e-05	0.00207435
chr1_234520931_234521175	50.7804	1.50451	0.352507	4.26804	1.97e-05	0.00208358
chr11_65288655_65289036	53.8117	1.48373	0.34765	4.26789	1.97e-05	0.00208358
chr11_85407505_85408004	84.7225	1.20315	0.281928	4.26757	1.98e-05	0.00208483
chr11_46906619_46907013	80.3391	1.25225	0.293465	4.26711	1.98e-05	0.00208624
chr11_97201550_97202742	245.652	-0.871123	0.204154	-4.267	1.98e-05	0.00208624
chr7_75014561_75015159	323.438	0.828461	0.194163	4.26685	1.98e-05	0.00208624
chr6_37369795_37370182	35.3833	-1.70876	0.400543	-4.26611	1.99e-05	0.00209131
chr12_75177972_75178280	15.4064	-2.70097	0.633338	-4.26466	2e-05	0.00210321
chr6_50927841_50928276	48.3093	-1.50072	0.352162	-4.26144	2.03e-05	0.00213186
chr12_120093646_120094301	104.328	1.14891	0.269678	4.2603	2.04e-05	0.00214094
chr17_12686570_12686884	51.1399	1.4774	0.346957	4.25816	2.06e-05	0.00215606
chr2_98086538_98087430	181.468	0.952385	0.223649	4.2584	2.06e-05	0.00215606
chr8_20306604_20306982	49.5371	-1.43982	0.338128	-4.25822	2.06e-05	0.00215606
chrX_110383462_110383797	23.6767	-2.05111	0.481791	-4.25725	2.07e-05	0.00216299
chr9_137055407_137056111	84.6126	1.27877	0.300417	4.25664	2.08e-05	0.0021671
chr1_202048945_202049481	186.502	0.926447	0.217739	4.25484	2.09e-05	0.00217983
chr14_44895795_44896007	15.9688	-2.57784	0.605871	-4.25476	2.09e-05	0.00217983
chr6_13004638_13004876	36.5883	1.77608	0.417427	4.25482	2.09e-05	0.00217983
chr15_89845495_89845819	32.0116	-1.78923	0.420562	-4.25438	2.1e-05	0.00218176
chr8_26457833_26458173	39.1164	-1.61003	0.3785	-4.25372	2.1e-05	0.00218633
chr7_38382687_38383042	18.0891	-2.38179	0.560427	-4.24995	2.14e-05	0.00222156
chr8_92972515_92972841	116.455	1.06597	0.25095	4.24774	2.16e-05	0.00224169
chr2_18836520_18836932	34.7596	1.78599	0.420535	4.24695	2.17e-05	0.00224768
chr3_177478334_177478920	39.0239	-1.63533	0.385168	-4.24576	2.18e-05	0.00225776
chr7_134790148_134790672	184.417	0.918367	0.216337	4.24508	2.19e-05	0.00226277
chr12_27640574_27640955	66.7445	1.40256	0.330452	4.24437	2.19e-05	0.00226613
chr19_49217354_49217992	240.698	0.86207	0.203103	4.2445	2.19e-05	0.00226613
chr11_129440063_129440504	31.8606	-1.86489	0.439461	-4.24358	2.2e-05	0.00227027
chr20_6199652_6200248	37.6678	1.93282	0.455467	4.24361	2.2e-05	0.00227027
chr6_12300966_12301429	31.3672	-1.87338	0.441553	-4.24271	2.21e-05	0.00227725
chr1_3291874_3292646	184.798	0.979451	0.230882	4.24222	2.21e-05	0.00227836
chr10_45420528_45420801	34.639	1.8135	0.427471	4.2424	2.21e-05	0.00227836
chr8_141415773_141416157	330.583	0.867976	0.204644	4.2414	2.22e-05	0.00228479
chr18_45930984_45931288	55.2475	1.45718	0.34358	4.24117	2.22e-05	0.00228529
chr12_99154268_99155015	184.999	-0.960709	0.226591	-4.23984	2.24e-05	0.00229691
chr16_89723854_89724298	106.719	1.14764	0.270731	4.23904	2.24e-05	0.00230134
chr5_107466245_107466756	53.4826	-1.39007	0.327916	-4.23911	2.24e-05	0.00230134
chr12_32839730_32840426	136.514	1.0573	0.249461	4.23836	2.25e-05	0.00230441
chr6_142518141_142518821	40.2771	1.72275	0.406449	4.23853	2.25e-05	0.00230441
chr7_132065429_132066006	64.6183	-1.31711	0.310796	-4.23785	2.26e-05	0.00230777
chr1_178536952_178537394	62.4419	-1.31877	0.311328	-4.23594	2.28e-05	0.00232552
chr12_3251728_3251977	84.7022	1.23832	0.292378	4.23535	2.28e-05	0.00232972
chr3_39166177_39166694	47.7117	-1.46123	0.345052	-4.23481	2.29e-05	0.00233303
chr4_112857516_112857862	34.8134	-1.6797	0.396655	-4.23466	2.29e-05	0.00233303
chr12_92518189_92518581	33.5391	2.07799	0.490875	4.23325	2.3e-05	0.00234581
chr1_160206472_160206751	37.2851	-1.66854	0.394228	-4.23243	2.31e-05	0.00235243
chr9_439466_439843	21.8535	-2.17442	0.513857	-4.23157	2.32e-05	0.00235951
chr16_88770588_88771422	298.24	0.812817	0.192162	4.22986	2.34e-05	0.00237554
chr3_129611873_129612454	62.8102	-1.30168	0.307754	-4.22963	2.34e-05	0.00237604
chr3_55198500_55198987	57.4803	-1.34453	0.3179	-4.22942	2.34e-05	0.00237631
chr19_7989035_7989454	84.5868	1.19733	0.28312	4.22906	2.35e-05	0.00237814
chr7_149427173_149427524	67.4977	1.39507	0.329906	4.22869	2.35e-05	0.00238005
chr12_109116364_109116929	140.058	1.00619	0.23797	4.22821	2.36e-05	0.00238318
chr20_17873895_17874510	107.056	1.19869	0.283518	4.22791	2.36e-05	0.00238442
chr5_14850416_14851376	153.863	0.972547	0.230054	4.22748	2.36e-05	0.00238706
chr3_34859802_34860113	31.396	-1.96523	0.464959	-4.22668	2.37e-05	0.00239354
chr6_30447325_30447549	37.0219	1.72022	0.407099	4.22555	2.38e-05	0.00240365
chr6_150857623_150857989	32.5107	-1.79345	0.424527	-4.22457	2.39e-05	0.00241014
chr8_28631343_28631683	31.4263	1.8819	0.445459	4.22463	2.39e-05	0.00241014
chr8_79952936_79953310	39.6504	-1.62296	0.384209	-4.22415	2.4e-05	0.00241272
chr12_6053535_6054166	82.9511	-1.17775	0.278964	-4.22187	2.42e-05	0.00243132
chr20_62561158_62561539	59.5993	1.40712	0.333292	4.22187	2.42e-05	0.00243132
chr9_6315044_6315743	63.3168	1.40227	0.332127	4.2221	2.42e-05	0.00243132
chr4_91064297_91064887	82.8807	1.21059	0.28683	4.22058	2.44e-05	0.0024433
chr10_103044800_103045463	41.0458	-1.5816	0.374812	-4.21972	2.45e-05	0.00245066
chr2_85277684_85278232	299.497	0.869295	0.206028	4.21929	2.45e-05	0.00245325
chr12_19946595_19946898	23.2328	-2.23588	0.52997	-4.21888	2.46e-05	0.00245579
chr2_159202569_159203120	213.317	-0.874841	0.207406	-4.21802	2.46e-05	0.00246319
chr11_97965966_97966426	29.92	-1.84857	0.438321	-4.21739	2.47e-05	0.0024681
chr5_36125893_36126136	37.252	1.73293	0.410949	4.21688	2.48e-05	0.00247158
chr17_66151407_66151756	15.0825	3.04268	0.721647	4.2163	2.48e-05	0.00247602
chr18_36539780_36540197	72.6596	1.27342	0.302054	4.21587	2.49e-05	0.00247874
chr2_46171153_46172496	107.83	1.08592	0.257642	4.21484	2.5e-05	0.00248798
chr1_20265374_20265677	40.569	-1.58742	0.376693	-4.21409	2.51e-05	0.00249229
chr8_17608062_17609247	213.852	0.933888	0.221608	4.21415	2.51e-05	0.00249229
chr8_19010623_19010889	69.1935	1.29373	0.307086	4.21291	2.52e-05	0.00250331
chr2_55843178_55843554	31.2959	-1.7948	0.426048	-4.21267	2.52e-05	0.00250403
chr13_43036312_43037200	124.519	1.05518	0.25054	4.21163	2.54e-05	0.00251353
chr4_182190321_182190619	44.6123	1.59958	0.37997	4.20975	2.56e-05	0.00253092
chr8_60998990_60999360	47.8723	1.51992	0.361051	4.20971	2.56e-05	0.00253092
chr18_3216472_3217105	91.4777	1.1711	0.278231	4.2091	2.56e-05	0.00253572
chr7_151637775_151638275	87.9598	1.18168	0.280854	4.20745	2.58e-05	0.00255229
chr2_15448303_15448645	68.7071	1.28898	0.3064	4.20684	2.59e-05	0.00255711
chr10_3852199_3852727	83.9829	-1.21672	0.289285	-4.20595	2.6e-05	0.00256311
chr20_63930832_63931451	145.316	1.00503	0.238951	4.20599	2.6e-05	0.00256311
chrX_39953043_39953353	40.258	1.74863	0.4158	4.20545	2.61e-05	0.00256666
chr12_106030335_106031076	93.2077	-1.25911	0.299447	-4.20479	2.61e-05	0.00257098
chr17_64707168_64707598	43.0145	-1.54628	0.367749	-4.20471	2.61e-05	0.00257098
chr1_93751685_93752362	122.713	1.03562	0.246319	4.20436	2.62e-05	0.00257289
chr6_83183494_83183872	34.4564	-1.78632	0.424929	-4.20379	2.62e-05	0.00257731
chr1_167681533_167681899	91.4202	1.16337	0.276792	4.20305	2.63e-05	0.00258241
chr4_76634295_76634514	13.8527	-2.86694	0.682121	-4.20299	2.63e-05	0.00258241
chr4_56619274_56619597	54.6624	1.44767	0.344456	4.20277	2.64e-05	0.00258282
chr14_63224247_63224545	33.4183	1.79444	0.4271	4.20145	2.65e-05	0.00259557
chr3_63970664_63971231	108.164	1.07871	0.256757	4.2013	2.65e-05	0.00259557
chr3_117510367_117510715	23.3307	-2.05935	0.490257	-4.20054	2.66e-05	0.00260013
chr5_63916680_63917223	47.5946	-1.47344	0.350774	-4.20054	2.66e-05	0.00260013
chr1_22039708_22040275	46.0977	1.53381	0.365233	4.19954	2.67e-05	0.00260955
chr10_89238977_89239855	199.316	0.915709	0.218092	4.19872	2.68e-05	0.002617
chr1_57115016_57115537	182.193	0.959063	0.228458	4.19798	2.69e-05	0.00262351
chr17_81044060_81044276	34.3851	-1.73722	0.413865	-4.19755	2.7e-05	0.00262641
chr10_60956069_60956436	14.124	-2.7321	0.651044	-4.1965	2.71e-05	0.00262959
chr17_49146837_49147276	29.0058	-1.95466	0.465795	-4.1964	2.71e-05	0.00262959
chr18_3219596_3220350	215.014	0.880831	0.209902	4.19638	2.71e-05	0.00262959
chr3_16448663_16449076	37.3515	-1.73212	0.412744	-4.19659	2.71e-05	0.00262959
chr3_98746889_98747211	59.9065	1.37528	0.327699	4.19678	2.71e-05	0.00262959
chr7_106718296_106718730	25.8604	-2.00794	0.478578	-4.19563	2.72e-05	0.00263627
chr12_123075323_123076028	81.6913	1.24728	0.297413	4.19375	2.74e-05	0.00265607
chr10_15745703_15746131	71.3763	1.30951	0.31233	4.19271	2.76e-05	0.00266503
chr12_97837315_97837780	23.2757	-2.10313	0.501628	-4.1926	2.76e-05	0.00266503
chr20_62372311_62372589	112.34	1.06212	0.25334	4.19246	2.76e-05	0.00266503
chr22_23675706_23676038	32.167	1.88763	0.450284	4.1921	2.76e-05	0.00266715
chr6_85472821_85473364	27.0755	-1.99771	0.476667	-4.191	2.78e-05	0.00267799
chr7_128842022_128842834	177.12	0.95098	0.226928	4.19067	2.78e-05	0.00267979
chr19_16605383_16605860	65.3915	1.45032	0.346099	4.19048	2.78e-05	0.00268001
chr10_29725116_29725749	210.116	0.891795	0.212848	4.18982	2.79e-05	0.00268569
chr8_117863513_117863945	107.627	1.13256	0.27037	4.18892	2.8e-05	0.00269429
chr17_47208753_47209662	763.217	0.71377	0.170425	4.18819	2.81e-05	0.00270087
chr14_99127494_99128139	41.0521	-1.54167	0.368153	-4.18758	2.82e-05	0.00270594
chr12_103858989_103859450	40.6759	-1.66426	0.39746	-4.18724	2.82e-05	0.00270616
chr17_81011986_81012270	34.6035	1.7771	0.424412	4.18721	2.82e-05	0.00270616
chr5_132003283_132003734	59.3555	1.38239	0.330193	4.18661	2.83e-05	0.00271127
chr14_51547284_51547613	35.9742	-1.69489	0.404958	-4.18534	2.85e-05	0.00272436
chr2_208619870_208620298	65.4172	1.32997	0.317913	4.18344	2.87e-05	0.0027451
chr4_104429300_104429659	26.6734	2.0353	0.486552	4.18311	2.88e-05	0.00274699
chr8_141421125_141421299	40.562	1.63705	0.391415	4.18238	2.88e-05	0.00275363
chr12_116381670_116382411	50.4032	-1.44948	0.346604	-4.18195	2.89e-05	0.00275674
chr2_170739140_170739363	36.6599	-1.64917	0.394413	-4.18133	2.9e-05	0.00276214
chr6_34909609_34910011	33.8076	1.77226	0.423872	4.18113	2.9e-05	0.0027624
chr19_2627303_2627829	55.7353	-1.45187	0.347304	-4.18039	2.91e-05	0.00276933
chr10_88944006_88944278	13.8996	3.35899	0.803761	4.17909	2.93e-05	0.002783
chr4_25351974_25352465	24.4908	-2.04071	0.488342	-4.17886	2.93e-05	0.00278365
chr1_6724592_6725198	44.7858	-1.49306	0.357326	-4.17841	2.94e-05	0.00278704
chr21_16751720_16752007	28.2034	2.05729	0.492485	4.17736	2.95e-05	0.00279773
chr11_11481398_11481854	121.441	-1.09238	0.261546	-4.17665	2.96e-05	0.0028044
chr7_156951306_156951852	70.2742	-1.28184	0.306927	-4.17636	2.96e-05	0.00280581
chr12_62866490_62867122	53.2701	-1.39261	0.333506	-4.17567	2.97e-05	0.00281209
chr19_42038556_42039094	115.462	-1.07069	0.256472	-4.17466	2.98e-05	0.00282247
chr15_70337157_70337868	72.5224	1.28546	0.307937	4.17442	2.99e-05	0.00282333
chr10_49552231_49552569	25.8467	-1.98974	0.476673	-4.17423	2.99e-05	0.00282348
chr11_75418891_75419286	25.1726	-1.94468	0.465914	-4.17391	2.99e-05	0.00282528
chr17_75697731_75697880	22.0271	2.31679	0.555134	4.17338	3e-05	0.00282969
chr12_114319402_114319701	23.7319	2.21274	0.530276	4.17281	3.01e-05	0.00283462
chr11_118109208_118109540	22.6358	-2.10656	0.504902	-4.17221	3.02e-05	0.00283991
chr1_236067800_236068184	206.541	0.890197	0.213425	4.171	3.03e-05	0.00285103
chr4_8010686_8011025	158.262	0.955122	0.228992	4.17098	3.03e-05	0.00285103
chr15_45573934_45574594	64.0504	1.32062	0.316688	4.17011	3.04e-05	0.00285974
chr16_57477420_57477890	65.8401	1.31267	0.314944	4.16794	3.07e-05	0.00288485
chr7_5695380_5695792	120.942	1.05641	0.253475	4.16771	3.08e-05	0.00288557
chr12_59904723_59905448	81.2206	-1.25001	0.300125	-4.16496	3.11e-05	0.0029184
chr7_66183648_66184132	31.2105	-1.74251	0.418419	-4.1645	3.12e-05	0.00292201
chr6_154653909_154654143	16.5727	-2.44705	0.587694	-4.16381	3.13e-05	0.00292861
chr2_98917078_98917383	20.3582	-2.18858	0.525766	-4.16264	3.15e-05	0.00294148
chr1_163826355_163826890	57.672	1.40328	0.337139	4.16232	3.15e-05	0.00294213
chr2_237662692_237663155	150.604	0.961202	0.230934	4.16224	3.15e-05	0.00294213
chr11_135004444_135004960	138.882	-1.07766	0.25896	-4.16149	3.16e-05	0.00294532
chr3_194683512_194683703	30.468	-1.81518	0.436154	-4.16179	3.16e-05	0.00294532
chr6_70920081_70921061	40.9805	1.82292	0.438047	4.16148	3.16e-05	0.00294532
chr11_86719820_86720155	16.716	-2.53957	0.610366	-4.16074	3.17e-05	0.00295265
chr8_123691762_123692359	76.4694	1.26736	0.304612	4.16055	3.17e-05	0.00295285
chr3_125072920_125073692	74.5177	1.24979	0.300434	4.15995	3.18e-05	0.00295613
chr8_105524501_105524843	42.6379	1.57853	0.379451	4.16003	3.18e-05	0.00295613
chr2_50065635_50066213	76.3609	1.23433	0.296736	4.15969	3.19e-05	0.00295726
chr11_103800665_103801061	48.4097	1.51758	0.364882	4.15909	3.2e-05	0.00296283
chr9_115672697_115673417	44.2695	-1.49328	0.359217	-4.15705	3.22e-05	0.00298722
chr22_46754156_46754767	82.5742	-1.18291	0.284591	-4.15654	3.23e-05	0.00299159
chr1_6634538_6635074	138.217	1.01367	0.243947	4.15531	3.25e-05	0.00300554
chr10_79446308_79446865	224.242	0.871793	0.209833	4.15471	3.26e-05	0.00301117
chr1_28604572_28605325	78.8864	1.23508	0.297333	4.15386	3.27e-05	0.00301974
chr1_156126126_156126593	294.87	0.833288	0.200631	4.15334	3.28e-05	0.00301974
chr17_19570173_19570680	25.0144	2.23269	0.537588	4.15316	3.28e-05	0.00301974
chr3_119417832_119418509	236.729	0.855821	0.206061	4.15324	3.28e-05	0.00301974
chr5_65150670_65151139	75.1765	1.25396	0.301935	4.15309	3.28e-05	0.00301974
chr8_88286918_88287324	123.059	1.03721	0.249747	4.15303	3.28e-05	0.00301974
chr11_111557744_111558134	21.6524	-2.18977	0.527376	-4.15219	3.29e-05	0.00302773
chr2_133993138_133993552	73.6594	1.25638	0.30259	4.15208	3.29e-05	0.00302773
chr9_111958059_111958568	67.2009	-1.2496	0.30099	-4.15162	3.3e-05	0.00303158
chr4_53347005_53347461	51.3697	-1.4536	0.350224	-4.15048	3.32e-05	0.00304445
chr4_63777479_63778096	68.6566	1.33947	0.322782	4.14978	3.33e-05	0.00305153
chr4_24763513_24764248	41.0654	-1.52463	0.367481	-4.14885	3.34e-05	0.00306165
chr2_31335916_31336192	52.4672	-1.40742	0.339269	-4.14839	3.35e-05	0.00306555
chr4_129485610_129485950	26.1355	2.02359	0.487862	4.14788	3.36e-05	0.00307017
chr1_108149677_108150077	15.1151	-2.59542	0.62579	-4.14744	3.36e-05	0.00307379
chr7_134025732_134026288	53.2901	-1.38447	0.333909	-4.14625	3.38e-05	0.00308752
chr5_179870047_179870915	255.811	0.860077	0.207446	4.14603	3.38e-05	0.00308812
chr6_137413535_137413814	30.688	1.88781	0.455379	4.14558	3.39e-05	0.00309187
chr13_113224431_113224908	63.799	1.30749	0.315449	4.14485	3.4e-05	0.00309833
chr5_178331453_178332183	250.674	0.880815	0.212512	4.14477	3.4e-05	0.00309833
chr2_238169837_238170217	34.9999	-1.71194	0.413189	-4.14323	3.42e-05	0.00311685
chr17_57293174_57293457	49.8753	-1.41708	0.342065	-4.14273	3.43e-05	0.00312145
chr9_32430799_32431063	15.1868	-2.62263	0.633098	-4.14253	3.43e-05	0.00312176
chr8_142615426_142615790	169.019	0.960443	0.231874	4.14209	3.44e-05	0.00312545
chr19_2032266_2032799	76.3918	1.22664	0.296176	4.14161	3.45e-05	0.0031298
chr17_40915255_40915511	14.9212	-2.59943	0.627772	-4.14073	3.46e-05	0.00313951
chr7_36115560_36116181	103.581	-1.06863	0.258206	-4.13865	3.49e-05	0.00316569
chr4_168816000_168816327	86.0969	1.15507	0.279283	4.13585	3.54e-05	0.00320224
chr4_152156319_152157033	156.023	0.941541	0.227665	4.13564	3.54e-05	0.00320281
chr9_108720192_108720318	17.2352	-2.46213	0.595645	-4.13355	3.57e-05	0.00322976
chr1_234925764_234926211	70.3373	-1.30526	0.31586	-4.1324	3.59e-05	0.00324263
chr10_84525104_84525370	49.5502	1.48501	0.359366	4.1323	3.59e-05	0.00324263
chr17_50064547_50065072	136.983	-0.979779	0.237126	-4.1319	3.6e-05	0.00324592
chr6_111973150_111973728	63.2226	-1.27751	0.309198	-4.1317	3.6e-05	0.00324634
chr11_19240839_19241776	354.842	0.845419	0.204713	4.12977	3.63e-05	0.00327132
chr18_10015297_10015683	34.6217	-1.80074	0.436064	-4.12953	3.64e-05	0.00327227
chr5_82052222_82052519	16.3673	2.85279	0.6911	4.12789	3.66e-05	0.0032933
chr20_31604074_31604489	186.823	0.929756	0.225278	4.12716	3.67e-05	0.00330147
chr13_102878527_102878867	29.8154	-1.80111	0.436574	-4.12556	3.7e-05	0.00332206
chr6_14621401_14621781	41.6129	1.58852	0.385146	4.12446	3.72e-05	0.00333544
chr11_57072579_57072927	19.455	-2.23879	0.542905	-4.12373	3.73e-05	0.00334364
chr8_57650605_57650880	21.0019	-2.11699	0.513457	-4.12302	3.74e-05	0.00335161
chr15_89119773_89120029	24.9354	2.06373	0.50063	4.12227	3.75e-05	0.00336006
chr15_90706500_90706872	28.8635	1.97173	0.478353	4.12191	3.76e-05	0.00336284
chr1_24416985_24417326	28.5223	-1.8488	0.448578	-4.12148	3.76e-05	0.00336421
chr10_4243687_4243930	30.0827	-1.95229	0.47367	-4.12163	3.76e-05	0.00336421
chr6_89989658_89990145	31.2876	-1.81313	0.439966	-4.12108	3.77e-05	0.00336773
chr10_29587094_29587486	161.658	0.983478	0.238732	4.11958	3.8e-05	0.00338718
chr5_144697835_144698346	18.4661	-2.27021	0.551221	-4.11852	3.81e-05	0.00340042
chr8_73136124_73136529	23.6148	-1.99319	0.484057	-4.11768	3.83e-05	0.00341038
chr10_21194594_21195040	33.5664	1.94259	0.471818	4.11725	3.83e-05	0.00341425
chr10_91611017_91611599	107.026	1.10221	0.267777	4.11613	3.85e-05	0.00342587
chr5_175598773_175599498	95.9854	1.12346	0.27293	4.1163	3.85e-05	0.00342587
chr21_45228176_45228823	57.2821	-1.31415	0.3193	-4.11571	3.86e-05	0.00342967
chr6_80438827_80439139	13.5383	-2.75621	0.66978	-4.11509	3.87e-05	0.00343638
chr4_128565684_128565878	52.1216	1.4704	0.357341	4.11484	3.87e-05	0.0034376
chr1_236703054_236703402	96.699	1.15554	0.28086	4.11428	3.88e-05	0.00344248
chr4_123350147_123350503	24.8287	2.10938	0.512709	4.11419	3.89e-05	0.00344248
chr4_55303774_55304244	28.1114	-1.83272	0.445629	-4.11265	3.91e-05	0.00346297
chr8_21428249_21428605	39.8393	-1.54166	0.374933	-4.11182	3.93e-05	0.00347293
chr5_148912845_148913364	66.2066	-1.24667	0.303299	-4.11037	3.95e-05	0.00349228
chr16_50547424_50547839	41.2874	1.6175	0.393565	4.10986	3.96e-05	0.00349758
chr14_72665294_72665648	24.1451	-1.98159	0.48219	-4.10956	3.96e-05	0.00349957
chr3_109927249_109927544	21.7355	-2.19316	0.533779	-4.10874	3.98e-05	0.00350952
chr13_87954140_87954465	14.0495	-2.6925	0.655346	-4.10852	3.98e-05	0.00351031
chr9_9108524_9109109	48.3418	-1.41827	0.345262	-4.10782	3.99e-05	0.00351854
chr22_25051970_25052404	238.195	0.854255	0.207968	4.10762	4e-05	0.00351897
chr19_47729494_47729841	31.7242	-1.71468	0.417495	-4.10707	4.01e-05	0.00352486
chr7_126574172_126574562	17.0669	-2.44239	0.594758	-4.10652	4.02e-05	0.00353077
chr9_81671847_81672265	53.7819	1.40804	0.342982	4.10531	4.04e-05	0.00354686
chr15_90959921_90960279	40.5908	1.60476	0.390971	4.10455	4.05e-05	0.00355596
chr15_40266852_40267301	51.997	-1.37514	0.33515	-4.10307	4.08e-05	0.00357626
chr11_108975599_108976080	141.404	0.987056	0.240618	4.10218	4.09e-05	0.00358711
chr7_55308262_55308733	74.767	-1.24438	0.303357	-4.10204	4.1e-05	0.00358711
chr15_63055551_63055807	87.0896	1.17101	0.285495	4.10166	4.1e-05	0.00358788
chr2_46954942_46955529	57.3639	-1.32344	0.322651	-4.10176	4.1e-05	0.00358788
chr7_128845981_128846414	84.8336	1.17753	0.28713	4.10101	4.11e-05	0.00359536
chr18_47655044_47655426	29.4252	-1.81315	0.442141	-4.10083	4.12e-05	0.00359565
chr6_118377948_118378414	36.8719	1.7422	0.424897	4.10028	4.13e-05	0.00360166
chr6_98834239_98835001	217.307	0.858879	0.209479	4.10008	4.13e-05	0.00360231
chr18_34224487_34225300	227.841	0.833513	0.20332	4.09952	4.14e-05	0.00360841
chr17_62934065_62934362	34.5857	1.71224	0.4178	4.09824	4.16e-05	0.00362593
chr12_64673792_64674114	57.1514	1.38332	0.337583	4.09771	4.17e-05	0.0036316
chr19_518163_518815	105.176	-1.15619	0.282207	-4.09697	4.19e-05	0.00364065
chr2_129817164_129817606	42.9182	1.57754	0.38508	4.09665	4.19e-05	0.0036432
chr22_29208977_29209382	50.227	1.46792	0.358363	4.09618	4.2e-05	0.00364793
chr2_188527100_188527424	46.7376	1.50455	0.367352	4.09567	4.21e-05	0.00365343
chr3_184574395_184575394	212.879	0.855289	0.208899	4.09427	4.23e-05	0.00367292
chr1_159960716_159961025	20.2358	-2.18281	0.53325	-4.09341	4.25e-05	0.00368401
chr12_26870523_26871455	187.634	0.891071	0.217747	4.09222	4.27e-05	0.00370035
chr1_228842145_228842529	46.4164	-1.43382	0.350394	-4.09203	4.28e-05	0.00370091
chr22_38923870_38924168	63.1764	1.3137	0.321074	4.09159	4.28e-05	0.00370531
chr17_964938_965619	133.749	1.07004	0.261576	4.09076	4.3e-05	0.00371604
chr4_184733316_184733534	52.2142	1.43063	0.349851	4.08926	4.33e-05	0.00373746
chr6_75489098_75489382	140.099	0.970729	0.237403	4.08895	4.33e-05	0.00373987
chr6_168937122_168937444	24.8413	-2.02044	0.494192	-4.08838	4.34e-05	0.00374646
chr13_26425561_26425846	23.5039	-2.02994	0.4966	-4.08768	4.36e-05	0.00375514
chr10_96850717_96851236	32.7097	-1.71546	0.419748	-4.08689	4.37e-05	0.00376535
chr2_100904807_100905894	78.685	-1.17797	0.288296	-4.08598	4.39e-05	0.00377738
chr9_116275894_116276408	33.0056	-1.68179	0.411683	-4.08515	4.4e-05	0.00378827
chr1_200483479_200483788	58.0132	-1.31944	0.3231	-4.08368	4.43e-05	0.00380973
chr1_226993798_226994356	116.864	1.02701	0.251595	4.08199	4.47e-05	0.00383223
chr9_122307067_122307499	36.2347	-1.60129	0.392282	-4.08199	4.47e-05	0.00383223
chr11_65427835_65428746	178.925	0.894261	0.219113	4.08127	4.48e-05	0.00383599
chr15_95948420_95949067	32.6657	1.76003	0.431232	4.08139	4.48e-05	0.00383599
chr4_69467465_69468153	32.0693	1.78526	0.437396	4.08157	4.47e-05	0.00383599
chr2_18991543_18992222	52.5583	1.43083	0.350721	4.07968	4.51e-05	0.00385971
chr1_230340665_230340927	15.0436	-2.58473	0.633676	-4.07895	4.52e-05	0.00386922
chr11_71794420_71794927	42.9956	-1.46674	0.35964	-4.07835	4.54e-05	0.00387641
chr11_35491589_35491848	21.4008	-2.06602	0.506743	-4.07706	4.56e-05	0.00389539
chr3_196422906_196423625	193.351	0.936814	0.229819	4.07631	4.58e-05	0.00390514
chr16_28181545_28181910	79.3146	-1.1487	0.281866	-4.07533	4.59e-05	0.00391762
chr7_91644124_91644737	149.439	0.953797	0.234046	4.07525	4.6e-05	0.00391762
chr12_49507169_49507468	21.208	-2.11948	0.520226	-4.07415	4.62e-05	0.00393352
chr13_36706833_36707262	37.8272	-1.58777	0.389792	-4.07339	4.63e-05	0.00394319
chr2_186309875_186310433	69.8231	1.23741	0.303789	4.07325	4.64e-05	0.00394319
chr22_36451764_36452135	89.3839	1.15623	0.283958	4.07182	4.66e-05	0.00396475
chr3_120499004_120499350	36.321	-1.6259	0.399476	-4.07008	4.7e-05	0.00399187
chr1_174023531_174023867	67.5031	1.25681	0.308902	4.06862	4.73e-05	0.00400226
chr10_27600924_27601289	27.9324	2.06621	0.507807	4.06889	4.72e-05	0.00400226
chr16_89357423_89357861	86.3027	1.21186	0.297842	4.06879	4.73e-05	0.00400226
chr20_34578510_34578890	80.0908	-1.18361	0.290901	-4.06876	4.73e-05	0.00400226
chr6_16803272_16803949	144.29	0.965581	0.23733	4.06851	4.73e-05	0.00400226
chr7_128164161_128164943	51.3865	-1.38772	0.341048	-4.069	4.72e-05	0.00400226
chr1_208201044_208201605	61.4599	-1.28729	0.316459	-4.0678	4.75e-05	0.00400899
chr15_63057690_63058025	93.2226	1.11426	0.27392	4.06785	4.74e-05	0.00400899
chr12_115158730_115159213	33.1587	1.8501	0.454859	4.06742	4.75e-05	0.00401277
chr5_167814872_167815221	23.4656	-2.08198	0.51194	-4.06684	4.77e-05	0.00402001
chr16_69691890_69692737	93.8837	-1.07195	0.263611	-4.06639	4.77e-05	0.00402501
chr13_76723589_76724003	39.6343	-1.52924	0.376124	-4.06578	4.79e-05	0.00403285
chr17_77409243_77409854	227.713	0.908768	0.223546	4.06525	4.8e-05	0.00403929
chr7_156923203_156923530	22.8746	2.16775	0.533291	4.06486	4.81e-05	0.00404324
chr4_57078646_57079149	85.7098	1.13493	0.279442	4.06142	4.88e-05	0.00409767
chrX_4710671_4710933	23.2357	2.10134	0.517382	4.06149	4.88e-05	0.00409767
chr15_97890238_97890660	105.922	1.10271	0.271634	4.05956	4.92e-05	0.00412766
chr17_16477297_16477710	66.6712	-1.22288	0.301266	-4.05913	4.93e-05	0.00413237
chr6_52352436_52352924	41.6631	-1.48421	0.365663	-4.05896	4.93e-05	0.00413267
chr17_66952078_66952494	39.7596	-1.53538	0.378294	-4.05869	4.93e-05	0.00413466
chr1_201053950_201054486	53.7586	1.3796	0.339978	4.0579	4.95e-05	0.00414572
chr13_47215784_47216028	20.7148	-2.09373	0.51601	-4.05753	4.96e-05	0.00414678
chr14_68295231_68295959	73.9687	1.26204	0.311026	4.05767	4.96e-05	0.00414678
chr1_61334787_61335465	178.204	0.884742	0.218107	4.05646	4.98e-05	0.00416019
chr12_120571338_120572183	92.925	-1.07398	0.264752	-4.05655	4.98e-05	0.00416019
chr16_88118874_88119158	16.219	-2.44084	0.601902	-4.05521	5.01e-05	0.0041797
chr12_3055090_3056327	99.2455	1.08961	0.268741	4.0545	5.02e-05	0.00418946
chr4_107896142_107896525	28.4954	-1.79307	0.442358	-4.05343	5.05e-05	0.00420586
chr6_127464093_127464442	24.988	-1.90858	0.471107	-4.05126	5.09e-05	0.00424217
chr14_88630492_88631133	49.2639	-1.47986	0.365355	-4.05047	5.11e-05	0.00425362
chr7_77683990_77684419	36.6496	-1.60782	0.396971	-4.05023	5.12e-05	0.00425523
chr1_67791677_67792097	42.1562	-1.49193	0.368488	-4.04879	5.15e-05	0.00427572
chr12_19967479_19967882	24.1535	-1.92967	0.476589	-4.04892	5.15e-05	0.00427572
chr1_244112451_244112936	18.8314	-2.24348	0.554181	-4.04827	5.16e-05	0.0042822
chr2_163348029_163348604	335.902	0.779584	0.192628	4.04709	5.19e-05	0.00430108
chr5_22560158_22560450	24.8211	-2.03045	0.501768	-4.0466	5.2e-05	0.00430716
chr11_118380639_118381103	39.4195	-1.57761	0.389895	-4.04623	5.2e-05	0.00431103
chr3_66905024_66905516	45.6155	-1.4621	0.361449	-4.04511	5.23e-05	0.00432888
chr15_80480950_80481480	72.9067	-1.17072	0.28945	-4.04463	5.24e-05	0.00433478
chr1_163104450_163104911	20.0499	-2.18837	0.54137	-4.04229	5.29e-05	0.00437458
chr22_19974522_19974951	64.5624	1.27149	0.314555	4.04217	5.3e-05	0.00437458
chr11_46050070_46050559	223.196	0.828622	0.20504	4.04127	5.32e-05	0.00438827
chr16_85673958_85674782	244.573	0.824549	0.204039	4.04113	5.32e-05	0.00438827
chr2_46284905_46285173	42.1776	-1.46697	0.363076	-4.0404	5.34e-05	0.00439898
chr10_12707475_12707953	72.2826	-1.19454	0.295721	-4.03942	5.36e-05	0.0044114
chr20_44180785_44181321	363.959	0.784136	0.194119	4.03947	5.36e-05	0.0044114
chr12_65300647_65301095	162.876	0.984453	0.243769	4.03846	5.38e-05	0.00442659
chr6_40762995_40763416	52.8775	-1.32484	0.328154	-4.03724	5.41e-05	0.00444665
chr19_52343643_52344190	102.557	1.06625	0.264131	4.03681	5.42e-05	0.00445133
chr2_47002540_47003020	49.7126	1.43724	0.356089	4.03617	5.43e-05	0.00445133
chr3_177777790_177778000	20.5263	2.31135	0.572632	4.03636	5.43e-05	0.00445133
chr4_55385233_55385554	16.4007	-2.42855	0.601713	-4.03606	5.44e-05	0.00445133
chr6_112043568_112043953	146.361	0.956906	0.237081	4.03619	5.43e-05	0.00445133
chr8_133036868_133037274	87.3648	-1.10646	0.274138	-4.03615	5.43e-05	0.00445133
chr14_84497676_84498129	18.9879	2.43957	0.604642	4.03473	5.47e-05	0.00447371
chr17_78000356_78000602	17.2402	-2.34175	0.58051	-4.03396	5.48e-05	0.00448533
chr6_11685387_11685779	15.2596	-2.56788	0.636634	-4.03353	5.49e-05	0.00449067
chr8_11746430_11746887	227.111	0.855805	0.212192	4.03316	5.5e-05	0.00449468
chr1_58619499_58620020	44.0739	1.52338	0.377729	4.033	5.51e-05	0.00449486
chr1_111745740_111746263	135.561	0.96476	0.239261	4.03224	5.52e-05	0.00450632
chr3_31004143_31004734	49.4797	-1.39343	0.345613	-4.03178	5.54e-05	0.00451231
chr6_1686038_1686775	48.2008	-1.40387	0.348217	-4.03158	5.54e-05	0.00451309
chr15_56963675_56964055	24.2263	2.04441	0.50713	4.03134	5.55e-05	0.00451473
chr12_5716301_5716540	41.5465	-1.57472	0.390721	-4.0303	5.57e-05	0.00453103
chr13_44815687_44816053	28.1798	-1.89715	0.470736	-4.03018	5.57e-05	0.00453103
chr5_121969215_121969574	31.9231	-1.66201	0.412459	-4.02952	5.59e-05	0.00454081
chr3_97076585_97077000	47.78	1.44907	0.359738	4.02812	5.62e-05	0.00456194
chr3_163622486_163622787	45.8532	1.47163	0.365333	4.02819	5.62e-05	0.00456194
chr5_52859653_52860030	35.5225	-1.64044	0.407339	-4.02722	5.64e-05	0.00457647
chr2_196291997_196292613	144.93	0.942714	0.234101	4.02695	5.65e-05	0.00457856
chr7_128056936_128057223	22.9108	-2.02889	0.503876	-4.02656	5.66e-05	0.00458317
chr1_203036156_203036807	207.025	0.874987	0.217325	4.02616	5.67e-05	0.00458806
chr2_207394718_207395391	57.0999	-1.28636	0.319548	-4.02556	5.68e-05	0.00459664
chr7_92866500_92866791	33.6175	1.75653	0.436431	4.02476	5.7e-05	0.0046093
chr9_2292622_2292998	16.832	2.57123	0.638992	4.02389	5.72e-05	0.00462339
chr13_98484378_98485211	156.633	0.926829	0.2304	4.0227	5.75e-05	0.00464379
chr1_8293215_8293563	16.8683	-2.33555	0.580946	-4.02026	5.81e-05	0.00468912
chr15_63056859_63057260	113.432	1.02606	0.255268	4.01954	5.83e-05	0.00470036
chr11_74754962_74755258	15.6327	-2.55125	0.634748	-4.01931	5.84e-05	0.00470195
chr3_177789578_177790009	52.2972	1.42865	0.355642	4.01712	5.89e-05	0.00474275
chr7_86975551_86975735	42.5433	1.51573	0.377381	4.01645	5.91e-05	0.004753
chr9_99389342_99389749	21.741	-2.05562	0.511845	-4.01611	5.92e-05	0.00475691
chr16_57475793_57476305	191.743	0.882984	0.219927	4.01489	5.95e-05	0.00477836
chr13_23511055_23511265	47.7743	1.43978	0.358636	4.0146	5.95e-05	0.00477846
chr19_28961810_28962032	13.7092	-2.6708	0.665275	-4.01458	5.96e-05	0.00477846
chr5_66580646_66580938	37.8993	-1.53111	0.381417	-4.01426	5.96e-05	0.00478172
chr19_51354772_51354998	31.0984	1.76971	0.44106	4.01242	6.01e-05	0.0048162
chr12_26150799_26150998	23.7712	-1.96027	0.488639	-4.01171	6.03e-05	0.00482755
chr9_10600426_10600664	26.5031	1.92553	0.480023	4.01132	6.04e-05	0.00483238
chr11_130908840_130909188	23.4013	-1.93436	0.482288	-4.01079	6.05e-05	0.00483996
chr20_6038250_6038664	93.8643	1.10393	0.27528	4.0102	6.07e-05	0.004849
chr1_85611855_85612222	104.193	-1.04954	0.261778	-4.00927	6.09e-05	0.00486117
chr4_177596117_177596453	26.1598	-1.82657	0.4556	-4.00915	6.09e-05	0.00486117
chrX_4965228_4965523	24.7502	2.0233	0.504655	4.00927	6.09e-05	0.00486117
chr8_140141929_140142585	94.025	1.07771	0.26884	4.00874	6.1e-05	0.00486641
chr3_88810503_88810945	55.0632	1.34672	0.335997	4.00813	6.12e-05	0.00487452
chr6_152316069_152316339	21.7198	-2.02275	0.504673	-4.00805	6.12e-05	0.00487452
chr5_124162833_124163164	57.0685	1.36011	0.339387	4.00756	6.14e-05	0.00488147
chr15_85316172_85316792	25.0789	1.98897	0.496402	4.00676	6.16e-05	0.00489472
chr2_122028293_122028720	32.4765	-1.66368	0.415326	-4.00573	6.18e-05	0.00491297
chr9_73271129_73271322	14.9385	-2.53295	0.632479	-4.0048	6.21e-05	0.00492921
chr2_76667697_76668525	90.5393	1.13837	0.284274	4.00447	6.22e-05	0.00492966
chr5_107217687_107218279	137.585	0.9457	0.236159	4.0045	6.21e-05	0.00492966
chr22_31610861_31611822	73.0063	1.27499	0.318423	4.00406	6.23e-05	0.00493508
chr15_95003427_95003805	20.3664	2.29372	0.572942	4.0034	6.24e-05	0.00494565
chr9_36103063_36103272	56.326	1.34593	0.336236	4.00293	6.26e-05	0.0049523
chr2_59105774_59106091	18.4796	-2.37119	0.59255	-4.00167	6.29e-05	0.00497574
chr11_18408468_18409264	34.8755	1.80995	0.452318	4.0015	6.29e-05	0.00497594
chr10_59872989_59873436	56.1142	1.34042	0.335004	4.00121	6.3e-05	0.00497891
chr4_64341653_64342084	343.892	0.791597	0.197854	4.00091	6.31e-05	0.00498199
chr6_121520722_121521157	26.6706	-1.87304	0.4682	-4.00051	6.32e-05	0.00498731
chrX_106905171_106905632	29.6744	1.82034	0.455059	4.00022	6.33e-05	0.00499015
chr11_12897413_12897674	43.3567	1.51325	0.378354	3.99955	6.35e-05	0.00500064
chr5_172801173_172801712	29.9861	-1.79572	0.448994	-3.99942	6.35e-05	0.00500064
chr10_62015942_62016338	55.0679	1.36863	0.342334	3.99794	6.39e-05	0.00501621
chr2_150906578_150907207	41.4853	1.52611	0.381689	3.99832	6.38e-05	0.00501621
chr4_16642100_16642307	15.617	-2.47747	0.619684	-3.99795	6.39e-05	0.00501621
chr4_28209468_28209840	67.7889	1.23986	0.310126	3.99793	6.39e-05	0.00501621
chr6_85403506_85403930	23.176	-2.03867	0.509863	-3.99846	6.38e-05	0.00501621
chr2_101237790_101238296	155.517	0.939068	0.234899	3.99775	6.39e-05	0.005017
chr9_81842644_81843068	30.8545	-1.69047	0.422894	-3.9974	6.4e-05	0.00502123
chr19_42113638_42114122	39.517	-1.50161	0.375735	-3.99647	6.43e-05	0.00503773
chr9_109349427_109349812	24.846	-1.97371	0.493883	-3.99632	6.43e-05	0.00503773
chr3_177889225_177890029	95.3144	-1.07491	0.268988	-3.99615	6.44e-05	0.00503809
chr9_131492055_131492301	28.1368	1.86948	0.46786	3.9958	6.45e-05	0.00504238
chr15_63539655_63539846	29.9994	1.81317	0.45381	3.99545	6.46e-05	0.00504656
chr18_77101390_77101952	30.9237	-1.80391	0.451641	-3.99413	6.49e-05	0.00507167
chr18_46077459_46078131	91.4394	1.13255	0.283608	3.99337	6.51e-05	0.00508455
chr21_37536857_37537212	30.3404	1.8321	0.458925	3.99215	6.55e-05	0.00510766
chr9_120441595_120442086	24.0768	-1.91256	0.479147	-3.99158	6.56e-05	0.00511663
chr16_57639230_57639529	49.2272	1.42417	0.356948	3.98985	6.61e-05	0.00514765
chr20_57469161_57469935	260.825	0.791317	0.198328	3.98994	6.61e-05	0.00514765
chr1_153466382_153467481	57.9737	-1.2697	0.318254	-3.98957	6.62e-05	0.00514933
chr12_42789973_42790534	200.609	0.888885	0.222808	3.98947	6.62e-05	0.00514933
chr2_152200444_152201014	31.1818	-1.70183	0.426668	-3.98864	6.65e-05	0.00516416
chr1_43853513_43853962	85.138	1.13386	0.284311	3.9881	6.66e-05	0.00516934
chr2_26757928_26758363	51.0137	-1.41698	0.355304	-3.98808	6.66e-05	0.00516934
chr3_100955031_100955389	28.3208	-1.74322	0.43712	-3.98796	6.66e-05	0.00516934
chr11_82980322_82980833	31.6481	-1.6619	0.416768	-3.98758	6.68e-05	0.00517172
chr19_10533698_10534245	33.2308	-1.66141	0.416666	-3.9874	6.68e-05	0.00517172
chr3_121601008_121601773	149.092	0.946329	0.237323	3.98752	6.68e-05	0.00517172
chr12_76369944_76370198	27.8506	1.9218	0.482077	3.98651	6.71e-05	0.005188
chr8_124866522_124866837	24.5149	-1.89703	0.47593	-3.98594	6.72e-05	0.00519702
chr3_151971911_151972444	28.9309	1.84549	0.463034	3.98565	6.73e-05	0.00520024
chr12_49233021_49233462	184.215	0.940381	0.236001	3.98466	6.76e-05	0.00521548
chr3_195100790_195101233	73.3463	1.21519	0.304959	3.98478	6.75e-05	0.00521548
chr11_61827405_61828604	506.027	0.784543	0.196914	3.98419	6.77e-05	0.00522237
chr1_67682712_67683117	24.0039	-1.94439	0.488103	-3.98357	6.79e-05	0.00523282
chrX_44314218_44314639	125.523	1.02333	0.25692	3.98308	6.8e-05	0.00524033
chr11_116387672_116388415	52.5732	1.35858	0.341153	3.98232	6.82e-05	0.00525378
chr11_29173684_29173995	14.6353	-2.50822	0.629945	-3.98165	6.84e-05	0.00526531
chr10_114271669_114272229	45.5802	-1.41746	0.356082	-3.98071	6.87e-05	0.00528302
chr1_107670134_107670387	33.1726	1.69603	0.42608	3.98054	6.88e-05	0.00528346
chr19_45788140_45788365	78.2314	1.15929	0.291294	3.97979	6.9e-05	0.00529677
chr2_168816461_168816733	47.6035	-1.36443	0.342889	-3.97921	6.91e-05	0.00530656
chr6_68680357_68680641	43.0737	1.49163	0.374906	3.97868	6.93e-05	0.00531505
chr2_1055086_1055543	27.0798	-1.8209	0.457738	-3.97804	6.95e-05	0.00532595
chr2_28355334_28355846	117.892	1.01317	0.254703	3.97786	6.95e-05	0.00532665
chr13_51246127_51247341	452.949	0.788717	0.198306	3.97728	6.97e-05	0.00533643
chr19_46271511_46272430	49.6284	-1.39337	0.350345	-3.97713	6.98e-05	0.00533643
chr12_101018654_101018874	17.798	-2.28487	0.574658	-3.97604	7.01e-05	0.00535764
chr3_72728887_72729495	169.033	0.969492	0.243864	3.97555	7.02e-05	0.0053655
chr11_80136992_80137427	32.8452	-1.62321	0.40834	-3.97515	7.03e-05	0.00536781
chr6_170464189_170464932	92.254	1.08874	0.273886	3.97517	7.03e-05	0.00536781
chr2_196068281_196069196	227.092	0.865799	0.217828	3.97469	7.05e-05	0.00537484
chr18_8948544_8949017	39.8725	-1.49263	0.375588	-3.97412	7.06e-05	0.00538441
chr11_117209494_117210154	92.002	1.08438	0.272908	3.97341	7.08e-05	0.0053937
chr17_44587239_44587815	328.777	-0.749094	0.18852	-3.97355	7.08e-05	0.0053937
chr17_64178171_64179291	104.026	1.04867	0.263933	3.97327	7.09e-05	0.00539376
chr2_66839723_66840320	59.6622	-1.29071	0.324898	-3.97267	7.11e-05	0.00540058
chr9_121644934_121645460	55.8337	1.35853	0.341957	3.97281	7.1e-05	0.00540058
chr14_54606192_54606787	218.836	0.866523	0.218145	3.97224	7.12e-05	0.00540702
chr9_33946850_33947328	30.8745	-1.77167	0.446079	-3.97166	7.14e-05	0.00541686
chr16_4240321_4241103	204.76	0.852552	0.214803	3.969	7.22e-05	0.00547428
chr17_48970211_48970574	64.9409	1.2628	0.318248	3.96798	7.25e-05	0.00549451
chr3_178703622_178703969	16.9199	-2.33601	0.588749	-3.96776	7.26e-05	0.00549624
chr3_90011123_90011815	129.34	1.00757	0.253971	3.96725	7.27e-05	0.00550449
chr12_25648486_25648811	80.7288	1.13437	0.286025	3.96599	7.31e-05	0.00552688
chr4_151489395_151490334	51.5794	1.39059	0.35062	3.96608	7.31e-05	0.00552688
chr4_118927960_118928265	38.1614	1.70894	0.43101	3.96497	7.34e-05	0.00554711
chr5_9059962_9060455	38.0707	-1.56039	0.393639	-3.96401	7.37e-05	0.00556609
chr18_22314375_22314755	38.6233	-1.54463	0.389724	-3.96339	7.39e-05	0.00557708
chr1_247055039_247055609	50.0503	1.44386	0.364336	3.96299	7.4e-05	0.00558316
chr14_53619898_53620597	61.5683	-1.23107	0.310695	-3.96232	7.42e-05	0.00559548
chr11_66996866_66997473	63.8723	-1.24393	0.314138	-3.95982	7.5e-05	0.0056413
chr12_52907799_52908075	103.339	1.04197	0.263161	3.95944	7.51e-05	0.0056413
chr17_33086053_33086507	34.6079	-1.58586	0.40049	-3.9598	7.5e-05	0.0056413
chr2_205060311_205060588	14.0461	-2.54758	0.643435	-3.95935	7.52e-05	0.0056413
chr21_39776589_39777028	35.1797	-1.59263	0.40219	-3.95989	7.5e-05	0.0056413
chr5_149422446_149423342	573.197	0.720916	0.182078	3.95937	7.51e-05	0.0056413
chr7_43647846_43648571	75.5059	-1.1323	0.285951	-3.95975	7.5e-05	0.0056413
chr2_223484283_223484834	27.0191	1.9426	0.490764	3.95832	7.55e-05	0.00566219
chr2_35291788_35292653	201.554	-0.829646	0.209664	-3.95702	7.59e-05	0.00568908
chr6_158283735_158283908	39.3867	1.55457	0.392875	3.9569	7.59e-05	0.00568908
chr2_178717085_178717587	45.1138	1.51441	0.382798	3.95615	7.62e-05	0.00570352
chr6_55100738_55100999	31.8559	1.94961	0.492934	3.95512	7.65e-05	0.00572461
chr1_197440678_197441094	20.4832	-2.12218	0.536698	-3.95414	7.68e-05	0.00574119
chr7_19024327_19024531	14.6359	-2.5171	0.636558	-3.95423	7.68e-05	0.00574119
chr1_17128406_17128797	55.7306	-1.30518	0.330133	-3.95352	7.7e-05	0.00574603
chr18_75112641_75113007	63.0916	1.29737	0.328158	3.95351	7.7e-05	0.00574603
chr4_55074365_55074680	19.532	-2.11851	0.535856	-3.9535	7.7e-05	0.00574603
chr1_228293575_228294224	50.4729	-1.34487	0.340229	-3.95283	7.72e-05	0.00575877
chr7_110681468_110682277	91.4889	1.08405	0.274279	3.95235	7.74e-05	0.0057669
chr15_42583102_42583243	16.6003	2.55867	0.647467	3.95181	7.76e-05	0.0057764
chr19_801317_801626	78.9429	1.22103	0.309042	3.95103	7.78e-05	0.0057848
chr22_27111001_27111468	65.6327	-1.18759	0.300566	-3.95116	7.78e-05	0.0057848
chr8_118635101_118635476	19.7779	-2.14243	0.542222	-3.9512	7.78e-05	0.0057848
chr13_110387344_110388515	193.374	0.8841	0.223793	3.95053	7.8e-05	0.00579348
chr1_183218821_183219273	58.1397	1.35534	0.34311	3.95018	7.81e-05	0.00579834
chr17_44147825_44148459	87.704	-1.09776	0.277929	-3.94977	7.82e-05	0.00580136
chr9_127561720_127562227	61.1792	-1.3964	0.353531	-3.94987	7.82e-05	0.00580136
chr10_73577797_73578260	211.136	0.829848	0.210125	3.9493	7.84e-05	0.00580917
chr2_159090697_159091207	49.2785	-1.37676	0.34864	-3.94894	7.85e-05	0.00581458
chr5_113043379_113044027	60.0826	1.28416	0.325255	3.94817	7.88e-05	0.00582976
chr3_132135947_132136427	30.4043	-1.70521	0.431976	-3.94746	7.9e-05	0.00584361
chr12_18998057_18999022	90.822	1.1602	0.293994	3.94633	7.94e-05	0.00586766
chr9_121604361_121604512	37.9478	1.58676	0.402176	3.94544	7.97e-05	0.00588588
chr19_7928362_7928605	28.8868	1.91783	0.486137	3.94504	7.98e-05	0.00589216
chr5_125027065_125027774	61.8971	1.25628	0.318461	3.94484	7.99e-05	0.0058936
chr2_218282256_218282945	86.4372	1.12157	0.284338	3.9445	8e-05	0.00589763
chr6_1079559_1079814	30.0901	-1.80201	0.456854	-3.94439	8e-05	0.00589763
chr12_68245241_68245985	167.582	0.899468	0.228063	3.94395	8.02e-05	0.00590496
chr20_62556429_62556635	37.865	1.57382	0.399121	3.94322	8.04e-05	0.0059193
chr12_91413582_91414114	69.4248	1.19525	0.303146	3.94282	8.05e-05	0.00592581
chr4_37885011_37885826	110.789	1.02565	0.260172	3.9422	8.07e-05	0.00593768
chr20_57440641_57441480	812.305	0.729128	0.184965	3.94197	8.08e-05	0.00593968
chr1_210222332_210222904	97.9771	1.06289	0.269667	3.9415	8.1e-05	0.00594784
chr5_83899271_83899664	22.7142	-1.93727	0.4916	-3.94074	8.12e-05	0.00596313
chr17_59792148_59792435	16.2431	-2.36523	0.600277	-3.94023	8.14e-05	0.00597231
chr14_43434283_43434675	18.9954	-2.11085	0.535754	-3.93997	8.15e-05	0.00597521
chr12_124557829_124558215	112.292	1.03232	0.262058	3.93928	8.17e-05	0.00598878
chr16_24994330_24994635	40.6732	-1.47314	0.373982	-3.93906	8.18e-05	0.00599082
chr7_69178053_69178467	65.1177	-1.20937	0.307074	-3.93837	8.2e-05	0.0060046
chrX_72045141_72046340	124.076	0.967271	0.24563	3.93791	8.22e-05	0.00601234
chr2_65003093_65003394	109.785	1.00973	0.256447	3.93738	8.24e-05	0.00601506
chr2_74032275_74032905	72.6294	1.1962	0.303786	3.93764	8.23e-05	0.00601506
chr22_36504956_36505535	84.9736	1.13977	0.289472	3.93741	8.24e-05	0.00601506
chr8_125191336_125192166	29.7252	-1.7101	0.4344	-3.93669	8.26e-05	0.00602879
chr16_64236417_64236646	18.426	2.34959	0.59691	3.93625	8.28e-05	0.00603627
chr5_90558377_90559145	740.362	0.737739	0.187437	3.93594	8.29e-05	0.00604054
chr5_55226447_55227734	177.926	0.962624	0.244587	3.93572	8.29e-05	0.0060424
chr8_25274006_25274681	35.8918	1.63012	0.414226	3.93534	8.31e-05	0.00604833
chr3_71127560_71128248	84.0437	1.10879	0.281784	3.93488	8.32e-05	0.00605649
chr11_106926362_106926698	20.2303	-2.0756	0.527584	-3.93415	8.35e-05	0.00606418
chr11_111745411_111745622	13.9112	-2.58695	0.65756	-3.93416	8.35e-05	0.00606418
chr22_34120475_34121249	107.742	1.0117	0.257147	3.93431	8.34e-05	0.00606418
chr15_99486202_99486821	94.9231	1.09829	0.279218	3.93345	8.37e-05	0.00607476
chr8_37142831_37143613	47.9755	-1.36439	0.346864	-3.93351	8.37e-05	0.00607476
chr11_112958725_112958971	40.6773	-1.45728	0.370586	-3.93237	8.41e-05	0.00609125
chr4_182766092_182766312	17.8515	2.37464	0.603859	3.93244	8.41e-05	0.00609125
chr9_127258818_127259457	72.4133	1.20606	0.306694	3.93244	8.41e-05	0.00609125
chr12_124501949_124502195	37.4632	1.61665	0.411343	3.93018	8.49e-05	0.00614357
chr13_63022121_63022365	23.8438	2.04801	0.521122	3.93	8.49e-05	0.00614457
chr11_76186777_76187027	43.1023	1.52699	0.388748	3.92795	8.57e-05	0.00619166
chr4_24956830_24957123	20.8124	-2.00859	0.511367	-3.92788	8.57e-05	0.00619166
chr12_13304967_13305350	31.3065	-1.6512	0.420411	-3.92757	8.58e-05	0.00619272
chr14_103576418_103576948	162.773	0.970716	0.247155	3.92755	8.58e-05	0.00619272
chr16_14686208_14686707	26.9215	-1.75646	0.447296	-3.92685	8.61e-05	0.0062073
chr3_189710634_189711139	79.4379	-1.10061	0.28033	-3.92611	8.63e-05	0.00622267
chr22_23522812_23523117	36.875	1.62992	0.415188	3.92575	8.65e-05	0.00622844
chr1_24683578_24684007	117.843	-0.976465	0.24875	-3.9255	8.66e-05	0.00623132
chr11_89381152_89381398	14.7758	-2.47245	0.6299	-3.92514	8.67e-05	0.00623331
chr2_17471023_17471259	14.2496	2.81929	0.718246	3.92524	8.66e-05	0.00623331
chr2_190948715_190949093	31.8857	-1.6717	0.426004	-3.92414	8.7e-05	0.00625556
chr15_41043180_41043667	23.9448	-1.94866	0.496707	-3.92315	8.74e-05	0.00627768
chr10_86128313_86128665	39.7494	-1.53201	0.390603	-3.92216	8.78e-05	0.00629998
chr3_123385006_123385417	95.2103	1.10865	0.282717	3.92142	8.8e-05	0.00631553
chr1_26017525_26018003	185.566	0.848745	0.216449	3.92123	8.81e-05	0.00631683
chr4_111027496_111028006	22.4215	-1.93442	0.493382	-3.92074	8.83e-05	0.00632605
chrX_150862391_150862756	43.4696	1.60818	0.410238	3.92012	8.85e-05	0.00633881
chr5_143243949_143244366	33.941	-1.56758	0.399897	-3.91995	8.86e-05	0.00633943
chr9_35521596_35522144	303.039	0.763476	0.194775	3.91978	8.86e-05	0.00634015
chr2_166802447_166802761	29.4338	1.91759	0.489253	3.91943	8.88e-05	0.006342
chr9_110763491_110763947	44.9924	1.46188	0.372971	3.91956	8.87e-05	0.006342
chr13_50411173_50411727	36.2149	-1.56714	0.399889	-3.91894	8.89e-05	0.00634563
chr19_28966919_28967394	36.3279	-1.58576	0.40466	-3.91874	8.9e-05	0.00634563
chr2_168105232_168105595	59.2722	1.28762	0.328578	3.91876	8.9e-05	0.00634563
chr5_57816134_57816470	35.4341	-1.53402	0.391424	-3.91908	8.89e-05	0.00634563
chr4_109462377_109462759	29.1472	1.8201	0.464486	3.91853	8.91e-05	0.00634747
chr17_41415984_41416267	21.5215	-1.9884	0.507545	-3.91769	8.94e-05	0.00636606
chr8_75002526_75002851	50.7728	1.37419	0.35098	3.9153	9.03e-05	0.0064256
chr1_226474484_226475054	90.4957	1.0747	0.27466	3.91286	9.12e-05	0.00648714
chr14_90521431_90521784	49.1795	1.37302	0.350991	3.91183	9.16e-05	0.00651112
chr3_150469588_150470098	57.5171	-1.24595	0.318537	-3.91146	9.17e-05	0.00651727
chr11_46697188_46697804	210.742	0.815269	0.208443	3.91124	9.18e-05	0.00651858
chr5_173324058_173324399	53.3394	1.36903	0.350034	3.91114	9.19e-05	0.00651858
chr8_29318693_29319171	138.683	0.973297	0.248884	3.91065	9.2e-05	0.00652798
chr18_54806026_54806360	80.5345	1.16701	0.29845	3.91024	9.22e-05	0.00653545
chr2_205730401_205730634	24.3854	2.01345	0.514992	3.90967	9.24e-05	0.0065442
chr8_50056237_50056946	38.0289	-1.49633	0.382728	-3.90963	9.24e-05	0.0065442
chr1_23919980_23920456	102.818	1.02821	0.263109	3.90791	9.31e-05	0.00658723
chr6_29965991_29966339	37.8691	1.55903	0.398992	3.90742	9.33e-05	0.00659696
chr10_28734945_28735429	29.3325	-1.70752	0.437032	-3.90708	9.34e-05	0.00660241
chr14_33765342_33765656	85.2786	1.10423	0.282651	3.9067	9.36e-05	0.00660903
chr1_46284647_46285527	112.86	-0.980753	0.251057	-3.90649	9.36e-05	0.00661097
chr2_112150286_112150921	47.9029	-1.37863	0.352923	-3.90632	9.37e-05	0.00661176
chr11_3627257_3627647	48.2572	-1.41955	0.363412	-3.90617	9.38e-05	0.00661226
chr16_8751754_8752322	47.6911	-1.35082	0.345864	-3.90564	9.4e-05	0.00662296
chr11_16587732_16588067	32.317	1.77124	0.453594	3.90489	9.43e-05	0.00663968
chr12_93127698_93128643	264.129	0.76889	0.196946	3.90406	9.46e-05	0.00665488
chr3_119360073_119360522	103.785	1.01425	0.25979	3.90413	9.46e-05	0.00665488
chr4_107388176_107388460	14.2029	2.73964	0.701831	3.90357	9.48e-05	0.00666467
chr22_17938323_17938924	380.437	0.759199	0.194501	3.90332	9.49e-05	0.00666755
chr7_136033352_136034565	156.788	0.924961	0.237005	3.90271	9.51e-05	0.00668072
chr13_106484584_106485209	75.1441	1.14719	0.294028	3.90164	9.55e-05	0.0067051
chr17_21075436_21075730	37.5326	-1.50486	0.385707	-3.90155	9.56e-05	0.0067051
chr17_50593017_50593940	267.789	0.807167	0.206926	3.90076	9.59e-05	0.00672333
chr11_108967571_108968066	101.965	1.03087	0.264339	3.89979	9.63e-05	0.0067452
chrX_4805399_4806054	99.8397	1.0305	0.264251	3.8997	9.63e-05	0.0067452
chr1_99849837_99850676	551.252	0.72742	0.186549	3.89936	9.64e-05	0.00675084
chr13_107026050_107026359	26.4268	-1.78703	0.458319	-3.89909	9.66e-05	0.00675447
chr11_128714894_128715316	20.5198	-2.00526	0.514371	-3.89846	9.68e-05	0.0067661
chr7_53237450_53237867	121.806	0.978488	0.250998	3.8984	9.68e-05	0.0067661
chr11_117869924_117870629	223.784	0.807317	0.207163	3.89701	9.74e-05	0.00680112
chr17_58391448_58391984	145.613	0.976691	0.250638	3.89683	9.75e-05	0.00680239
chr1_15543410_15543970	38.1047	-1.48649	0.381496	-3.89649	9.76e-05	0.006808
chr6_36765687_36766460	185.515	0.838997	0.21533	3.89632	9.77e-05	0.00680879
chr1_67570443_67570917	33.3361	-1.56877	0.402644	-3.89617	9.77e-05	0.00680923
chr22_26416855_26417240	44.6055	-1.40489	0.360596	-3.89602	9.78e-05	0.00680952
chr14_23548707_23548988	24.9274	-1.82902	0.469493	-3.89573	9.79e-05	0.00681016
chr2_25078516_25079085	46.2057	-1.44322	0.370459	-3.89575	9.79e-05	0.00681016
chr2_113240891_113241384	61.4396	-1.22935	0.315616	-3.89507	9.82e-05	0.00682495
chr6_4380766_4381424	156.601	0.993157	0.25501	3.89458	9.84e-05	0.00683473
chr3_69293020_69293563	185.56	0.888111	0.228111	3.89332	9.89e-05	0.00686334
chr4_54281278_54281766	58.4185	-1.25687	0.32283	-3.8933	9.89e-05	0.00686334
chr10_110500263_110500932	230.509	0.848489	0.217986	3.8924	9.93e-05	0.00688487
chr2_46554249_46554725	206.124	0.838588	0.215492	3.8915	9.96e-05	0.00690656
chr11_130874313_130874793	25.6795	-1.80214	0.463139	-3.89114	9.98e-05	0.006913
chr4_85402434_85402708	21.7396	-1.97088	0.506526	-3.89098	9.98e-05	0.00691364
chr4_100591235_100591844	91.129	1.07145	0.275382	3.89077	9.99e-05	0.00691588
chr4_43113211_43114366	125.76	0.961857	0.247255	3.89015	0.000100184	0.00692964
chr1_203308892_203308989	30.8744	1.73425	0.445821	3.89	0.000100242	0.0069298
chr1_36183371_36183785	85.3092	1.10568	0.284274	3.88949	0.000100455	0.00693675
chr12_77122347_77122584	18.7715	-2.19263	0.563728	-3.88953	0.00010044	0.00693675
chr9_69324484_69325326	403.678	0.741029	0.190528	3.88935	0.000100514	0.0069369
chr5_175393803_175394448	218.171	0.822462	0.211487	3.88895	0.000100677	0.00694429
chr12_26745056_26745350	28.1408	1.88092	0.483697	3.88863	0.000100811	0.00694576
chr20_22717542_22717931	21.9101	-1.948	0.500948	-3.88863	0.00010081	0.00694576
chr1_68449900_68450279	32.9755	1.71286	0.440566	3.88785	0.000101134	0.00694964
chr1_241117278_241117694	34.59	1.61989	0.416631	3.88807	0.000101046	0.00694964
chr19_38722111_38722384	37.7084	1.54301	0.396882	3.88782	0.000101149	0.00694964
chr5_16897386_16898144	61.4064	1.25367	0.322434	3.88816	0.000101009	0.00694964
chr5_175590427_175590844	42.5826	-1.45805	0.374999	-3.88814	0.000101014	0.00694964
chr4_183409317_183410395	83.8897	-1.10728	0.284819	-3.88766	0.000101216	0.0069504
chr13_95378655_95379067	46.6859	-1.38537	0.356421	-3.8869	0.000101531	0.00696809
chr19_11539673_11540341	329.197	0.829371	0.21339	3.88665	0.000101636	0.00697142
chr18_8747296_8747885	42.994	-1.40157	0.360696	-3.88572	0.000102027	0.00699437
chr1_16019516_16019910	324.144	0.743026	0.191265	3.88479	0.000102419	0.00701181
chr12_93315958_93316503	48.4268	1.38088	0.35545	3.88487	0.000102387	0.00701181
chr9_99075281_99075820	44.0972	-1.37979	0.355184	-3.88471	0.000102452	0.00701181
chr5_37665893_37666254	33.3335	1.65844	0.427034	3.88362	0.000102911	0.00703933
chr1_57616846_57617356	64.5066	-1.20185	0.309517	-3.88297	0.000103187	0.00704647
chr17_80151454_80151630	29.9822	-1.70041	0.437892	-3.88318	0.000103101	0.00704647
chr4_55125118_55125800	129.173	0.993117	0.255761	3.88298	0.000103183	0.00704647
chr8_18580648_18581153	41.0856	-1.48781	0.383202	-3.88258	0.000103352	0.00705386
chr10_30454806_30455549	48.4151	-1.4055	0.362105	-3.88146	0.000103831	0.00707393
chr11_65485977_65486089	34.5833	1.65693	0.426909	3.88122	0.000103933	0.00707393
chr4_184838698_184839157	24.4942	1.97212	0.508112	3.88128	0.000103908	0.00707393
chr7_139422267_139422522	63.9486	1.2671	0.326461	3.88131	0.000103894	0.00707393
chr9_109986725_109987096	16.6392	-2.2796	0.587325	-3.88132	0.00010389	0.00707393
chr1_38740643_38741761	175.354	-0.930685	0.239838	-3.88048	0.00010425	0.00709159
chr2_133948840_133949351	128.165	0.937519	0.241629	3.87999	0.000104461	0.00709811
chr8_103344811_103345172	38.9636	-1.51749	0.391103	-3.88002	0.000104449	0.00709811
chr1_230899861_230900268	54.1597	-1.32904	0.342646	-3.87876	0.00010499	0.00713014
chr4_1043307_1044113	126.937	-1.01243	0.261103	-3.8775	0.000105535	0.00716316
chr7_123271246_123271564	26.8904	-1.73941	0.448857	-3.87519	0.000106541	0.00722753
chr1_54581482_54582166	611.647	0.652677	0.168447	3.87467	0.00010677	0.00723908
chr10_129055872_129056156	28.6696	1.80357	0.465543	3.87413	0.000107006	0.0072455
chr13_76790787_76791692	82.2051	1.10596	0.285499	3.87378	0.000107159	0.0072455
chr5_157948764_157949348	199.577	0.843461	0.217734	3.87381	0.000107149	0.0072455
chr6_125835240_125835812	25.3235	-1.79342	0.462948	-3.87392	0.000107097	0.0072455
chr8_49957232_49957598	18.431	-2.1437	0.553361	-3.87397	0.000107078	0.0072455
chr3_36933054_36933290	28.3836	1.8907	0.488151	3.87319	0.000107418	0.00725907
chr11_10451705_10452029	38.4176	-1.539	0.397412	-3.87255	0.000107702	0.0072623
chr18_48629800_48630303	41.809	-1.40701	0.363325	-3.87259	0.000107686	0.0072623
chr4_71379002_71379509	43.1934	1.51132	0.390253	3.87267	0.000107648	0.0072623
chr4_139243488_139243854	21.5908	-1.98544	0.512693	-3.87256	0.000107697	0.0072623
chr9_130357905_130358583	97.706	-1.0054	0.259632	-3.8724	0.00010777	0.00726292
chr4_25173454_25173853	37.2134	-1.52592	0.394117	-3.87174	0.00010806	0.00727852
chr6_36973661_36974049	82.4127	1.10467	0.285378	3.87088	0.000108442	0.00730025
chr14_93043365_93043877	229.5	0.815607	0.210761	3.86982	0.000108914	0.00732801
chr11_86570048_86570814	46.181	-1.37465	0.355382	-3.8681	0.000109687	0.00736796
chr6_38183884_38184351	63.5942	1.23128	0.318311	3.86816	0.000109661	0.00736796
chr8_73520590_73521029	27.4296	-1.88228	0.486606	-3.86817	0.000109656	0.00736796
chr3_53069742_53070022	36.4212	1.66065	0.429362	3.86771	0.000109862	0.00737171
chr5_132427315_132428431	206.641	0.831851	0.215069	3.86784	0.000109804	0.00737171
chr18_3211735_3211947	69.3114	1.1744	0.303657	3.86752	0.000109947	0.00737338
chr19_1039685_1040322	680.166	0.734085	0.189888	3.86587	0.000110693	0.00741937
chr16_86898315_86899464	53.9525	1.38559	0.358444	3.86557	0.000110832	0.00742463
chr9_113398179_113398477	44.7752	-1.36131	0.352184	-3.86535	0.000110932	0.00742729
chr12_4700596_4701088	32.0014	1.7549	0.454046	3.86502	0.000111081	0.0074288
chr2_191500115_191500826	42.8673	1.47122	0.38066	3.86492	0.000111125	0.0074288
chr4_185734764_185735119	43.2214	1.43991	0.37256	3.8649	0.000111135	0.0074288
chr1_39976791_39977058	21.0819	2.17139	0.561937	3.86412	0.000111492	0.00744868
chr12_8197599_8198237	91.8742	-1.04019	0.269222	-3.8637	0.000111682	0.00745323
chr4_47824734_47825470	556.233	0.725505	0.18777	3.86379	0.00011164	0.00745323
chr2_134421675_134421903	33.3682	1.6379	0.423959	3.86335	0.000111843	0.00745591
chr8_109607854_109608193	41.6021	1.53656	0.397717	3.86346	0.000111791	0.00745591
chr1_162207164_162207465	41.8788	1.47681	0.382308	3.86287	0.00011206	0.00746236
chr3_113405237_113405530	22.4142	2.03271	0.526214	3.8629	0.000112047	0.00746236
chr12_114799595_114800101	156.621	0.899848	0.232997	3.86206	0.000112436	0.00748336
chr12_122223585_122223897	20.0277	-2.02855	0.525498	-3.86025	0.00011327	0.00753476
chr16_9102455_9102676	14.6819	-2.54856	0.660236	-3.86008	0.000113351	0.00753557
chr20_37134095_37134749	46.011	1.42426	0.368984	3.85996	0.000113404	0.00753557
chr15_67150497_67150774	30.1534	-1.6581	0.429724	-3.85854	0.000114068	0.00757561
chr1_112394251_112394500	40.3783	-1.47621	0.382641	-3.85796	0.000114336	0.00758932
chr21_42227937_42228568	75.1906	-1.12461	0.29162	-3.8564	0.000115067	0.00763374
chr16_69894499_69894971	50.5744	1.34315	0.348352	3.85572	0.000115389	0.00765099
chr15_97867823_97868247	64.4651	1.2054	0.312645	3.8555	0.000115491	0.00765363
chr8_31238861_31239210	24.2126	-1.82849	0.474388	-3.85442	0.000116006	0.00768364
chr2_28352246_28352431	35.1926	1.61175	0.418216	3.85388	0.000116262	0.00768407
chr2_126970581_126970915	30.4953	-1.61395	0.418778	-3.85396	0.000116224	0.00768407
chr6_16450366_16450630	25.7576	-1.79384	0.465419	-3.85424	0.00011609	0.00768407
chr8_42532550_42532914	50.1586	1.44443	0.374786	3.85401	0.000116199	0.00768407
chr10_109987460_109987680	50.7789	-1.29692	0.33662	-3.85277	0.000116789	0.00771476
chr2_105592372_105592716	23.3783	-1.84948	0.480085	-3.8524	0.000116968	0.00772245
chr1_231818208_231818727	88.1268	1.10145	0.285943	3.852	0.000117156	0.00773072
chr1_183198389_183198841	67.1024	-1.16562	0.302693	-3.85083	0.000117716	0.00776354
chr9_113463312_113464173	279.965	0.796478	0.206881	3.84994	0.000118149	0.00778792
chrX_153953165_153953794	138.822	0.916243	0.238041	3.8491	0.000118552	0.00781034
chr6_12348575_12349065	40.0863	-1.4935	0.388053	-3.8487	0.000118747	0.00781897
chr13_66105647_66105968	18.8352	2.28653	0.594258	3.8477	0.00011923	0.00784593
chr15_62976296_62976703	30.3899	-1.66387	0.432444	-3.84759	0.000119284	0.00784593
chr7_148535208_148535744	134.926	0.933096	0.242528	3.84738	0.00011939	0.00784874
chr2_105488215_105488893	71.9837	1.15868	0.301279	3.84588	0.00012012	0.00789251
chr13_34157012_34157411	41.8067	-1.42354	0.370203	-3.8453	0.000120405	0.00790282
chr8_123503224_123503696	165.668	0.862303	0.224241	3.84543	0.000120343	0.00790282
chr7_127189887_127190338	89.0078	-1.03548	0.26935	-3.84437	0.00012086	0.00792851
chr15_28977396_28977923	47.049	-1.37384	0.357432	-3.84365	0.000121218	0.00794259
chr17_694308_694621	13.579	-2.57514	0.669975	-3.84364	0.000121222	0.00794259
chr6_72605727_72606061	25.7804	1.96532	0.51133	3.84355	0.000121268	0.00794259
chr7_125195252_125195503	14.7973	-2.39063	0.622013	-3.84337	0.000121354	0.00794398
chr6_62999206_62999632	120.874	0.9715	0.25291	3.84129	0.000122388	0.00800742
chr11_68783363_68784012	167.908	0.889409	0.23158	3.84062	0.000122725	0.00802524
chr10_35421355_35421789	43.77	-1.37055	0.356878	-3.84038	0.000122846	0.0080263
chr12_20136288_20136782	33.053	1.69521	0.44145	3.8401	0.000122982	0.0080263
chr19_46784599_46785101	86.0218	-1.08287	0.282001	-3.83993	0.000123067	0.0080263
chr4_7861428_7861751	24.623	-1.88424	0.490683	-3.84003	0.000123019	0.0080263
chr6_63476367_63476770	68.9501	1.17014	0.304717	3.84009	0.000122992	0.0080263
chr6_168755898_168756292	32.0912	-1.73816	0.452867	-3.83812	0.000123981	0.00808167
chr1_156251507_156251978	34.0772	1.61807	0.421746	3.8366	0.000124747	0.00811875
chr7_43038339_43038592	18.7133	-2.13437	0.556315	-3.83662	0.00012474	0.00811875
chr9_76932870_76933156	20.4524	-1.97841	0.515668	-3.8366	0.000124748	0.00811875
chr11_45880972_45881692	132.222	0.924957	0.241098	3.83643	0.000124836	0.00812018
chr4_154329834_154330230	26.1101	-1.75197	0.45671	-3.83607	0.000125018	0.00812778
chr1_58508446_58509106	246.411	0.77195	0.20125	3.83577	0.000125171	0.00812912
chr10_121668403_121669156	130.271	0.920604	0.24	3.83585	0.000125131	0.00812912
chr14_23436924_23437062	35.8608	1.56368	0.407704	3.83532	0.000125401	0.00813981
chr9_125763382_125763826	57.8084	1.26855	0.33077	3.83515	0.000125488	0.00814115
chr22_27238976_27239695	277.241	-0.774992	0.202114	-3.83442	0.00012586	0.00815671
chr3_6736900_6737499	32.8506	1.66998	0.435523	3.83443	0.000125853	0.00815671
chr4_139076084_139076343	61.84	1.26749	0.330573	3.83423	0.000125957	0.00815869
chr10_3886639_3886959	18.7705	-2.06964	0.539879	-3.83352	0.000126323	0.00817753
chr15_31268952_31269587	309.244	0.754736	0.196884	3.83341	0.00012638	0.00817753
chr17_45398874_45399164	49.1514	1.35302	0.353053	3.83234	0.000126933	0.00820616
chr5_65021563_65022124	62.4713	1.21774	0.31776	3.83227	0.000126966	0.00820616
chr5_178787064_178787364	21.1796	-1.99003	0.519296	-3.83216	0.000127023	0.00820616
chr12_94805829_94806035	22.0145	-1.92324	0.501895	-3.83196	0.000127125	0.00820846
chr1_94974825_94975222	27.3128	-1.7628	0.460199	-3.83052	0.000127874	0.00825254
chr1_203328852_203329117	55.4021	1.28712	0.336091	3.82969	0.000128304	0.00826729
chr11_29119573_29120250	31.7152	-1.57399	0.410977	-3.82986	0.000128214	0.00826729
chr3_110878915_110879258	20.5081	2.14157	0.55919	3.82977	0.000128263	0.00826729
chr3_159458045_159458447	26.9202	-1.75197	0.45754	-3.82911	0.000128607	0.0082782
chr8_128429653_128430227	73.6871	1.15719	0.3022	3.82921	0.000128553	0.0082782
chr18_23495681_23496110	39.1125	1.55369	0.405775	3.82894	0.000128695	0.00827951
chr6_70895881_70896338	34.9034	1.61897	0.422855	3.82867	0.00012884	0.00828452
chr22_27212638_27213080	80.7089	-1.08806	0.284205	-3.82843	0.000128961	0.008288
chr3_194089357_194089957	41.6994	-1.39706	0.364934	-3.82826	0.000129053	0.00828958
chr1_243598411_243598776	27.8789	-1.75692	0.458999	-3.82772	0.000129338	0.00830027
chr20_38108468_38109486	199.214	0.81229	0.212214	3.82769	0.000129354	0.00830027
chr15_55224927_55225314	28.426	1.77224	0.463035	3.82745	0.000129479	0.00830395
chr11_45365984_45366787	41.224	1.47465	0.3854	3.82629	0.000130089	0.00832333
chr2_41947586_41948322	197.453	0.838947	0.219257	3.82632	0.000130073	0.00832333
chr20_16580180_16580566	43.2162	-1.39725	0.36517	-3.82631	0.000130076	0.00832333
chr3_182165306_182165658	19.9704	-2.28714	0.597741	-3.82631	0.000130078	0.00832333
chr5_54457056_54457497	404.979	0.722125	0.18873	3.82623	0.000130118	0.00832333
chr15_75195323_75196084	175.559	0.862237	0.22538	3.8257	0.000130398	0.00833692
chr16_25481531_25482019	40.8196	-1.41552	0.370086	-3.82484	0.000130859	0.00835944
chr18_63161707_63162137	57.883	-1.21484	0.317622	-3.82478	0.000130886	0.00835944
chr5_148874050_148874355	42.1208	1.43867	0.376389	3.82229	0.000132217	0.00844007
chr15_73921212_73921921	162.947	-0.867266	0.226923	-3.82184	0.000132457	0.00844227
chr18_11989831_11990341	58.8323	1.26008	0.329688	3.82204	0.000132354	0.00844227
chr7_121961107_121961552	30.602	-1.61833	0.423431	-3.82194	0.000132406	0.00844227
chr19_12793398_12794224	712.482	0.720863	0.188627	3.82163	0.000132575	0.00844543
chr1_159598130_159598683	26.5146	-1.72959	0.45272	-3.82044	0.000133214	0.00847745
chr10_45445487_45446007	49.0878	1.35872	0.355645	3.82044	0.000133215	0.00847745
chr12_49868948_49869845	651.291	0.71081	0.186096	3.81959	0.000133675	0.00850234
chr3_73786513_73786839	16.674	-2.19578	0.574936	-3.81917	0.000133899	0.0085122
chr9_116219644_116220151	109.895	1.00287	0.262626	3.81861	0.000134208	0.0085274
chr22_41411490_41411792	27.9261	1.78765	0.468193	3.81818	0.000134439	0.0085377
chr1_218479826_218480435	39.8615	-1.51898	0.397988	-3.81664	0.00013528	0.00858672
chr2_240259031_240260108	530.627	0.671909	0.176089	3.81573	0.000135779	0.00860951
chr5_14156547_14156875	39.4053	-1.44108	0.377659	-3.81583	0.000135726	0.00860951
chr2_45922541_45922907	220.006	0.813085	0.213143	3.81475	0.000136323	0.00863958
chr8_130045621_130046250	116.876	0.965252	0.253073	3.81412	0.000136669	0.00865705
chr12_13390331_13390866	162.7	0.914711	0.23989	3.81305	0.000137263	0.00868647
chr6_157252861_157253373	37.2696	1.55379	0.407495	3.81303	0.000137274	0.00868647
chr15_43797667_43797881	37.98	-1.54703	0.40579	-3.8124	0.000137627	0.00870429
chr15_45035226_45035704	46.8506	1.3783	0.36157	3.81198	0.000137858	0.00871447
chr11_44842264_44842587	23.111	-1.86229	0.488633	-3.81123	0.000138279	0.00873658
chr4_73978936_73979381	18.5207	-2.07998	0.54588	-3.81033	0.000138784	0.00876398
chr6_90097963_90098582	39.548	-1.45608	0.382267	-3.80907	0.000139492	0.00880419
chr4_56757647_56758130	70.2176	-1.1219	0.294564	-3.80866	0.000139721	0.00881415
chr19_42290814_42291249	89.4355	1.06584	0.279869	3.80834	0.000139905	0.00882122
chr1_201377470_201378190	622.815	0.665467	0.174754	3.80803	0.000140079	0.0088277
chr3_160291519_160292273	92.9878	1.06278	0.279115	3.80767	0.00014028	0.00883584
chr14_23437170_23437264	33.1747	1.62314	0.42639	3.80671	0.000140829	0.0088659
chr12_130961925_130962409	55.0461	1.27242	0.334271	3.80654	0.000140927	0.00886751
chr5_84242337_84242680	16.5396	-2.20029	0.578156	-3.8057	0.000141406	0.00889314
chr6_107275369_107275841	64.4903	1.22726	0.322564	3.80469	0.000141983	0.00892491
chr3_29140859_29141309	45.265	1.42846	0.375493	3.80423	0.000142245	0.00893678
chr2_129061032_129061642	48.4566	-1.30633	0.343422	-3.80386	0.00014246	0.00894578
chr12_47082813_47083104	18.6044	-2.06235	0.542232	-3.80345	0.000142696	0.008956
chr2_8804988_8806008	210.272	0.845354	0.222268	3.80331	0.000142778	0.00895659
chr9_3023669_3023982	25.73	1.84129	0.4842	3.80274	0.000143103	0.00897239
chr1_61491404_61491872	54.7847	-1.23805	0.325616	-3.80218	0.000143426	0.00898645
chr11_112784312_112785016	479.453	0.737833	0.194072	3.80185	0.000143618	0.00898645
chr13_94433147_94433978	122.086	0.967916	0.254588	3.8019	0.000143591	0.00898645
chr2_228917099_228917536	22.8402	-1.84703	0.485818	-3.8019	0.00014359	0.00898645
chr5_16120572_16121061	43.309	1.42794	0.375865	3.79909	0.000145228	0.00908258
chr16_88270425_88270779	33.3182	-1.53447	0.403938	-3.79879	0.000145405	0.009089
chr3_185537411_185537919	35.6757	-1.48964	0.392162	-3.79854	0.000145552	0.0090936
chr16_48335838_48336345	19.0036	-2.08016	0.547671	-3.7982	0.000145752	0.00909687
chr6_124791194_124791559	31.8235	1.67419	0.44078	3.79825	0.000145722	0.00909687
chr8_95800612_95800849	21.2039	-1.92047	0.505675	-3.79783	0.000145966	0.00910561
chr16_14321533_14321893	24.1728	1.95902	0.515928	3.79709	0.000146406	0.00912388
chr4_24744010_24744324	27.506	-1.71444	0.451501	-3.79719	0.000146343	0.00912388
chr7_92740760_92741053	17.6843	-2.11293	0.556501	-3.79681	0.000146572	0.00912958
chr11_103633408_103633826	29.6121	-1.61701	0.425968	-3.79608	0.000147	0.00914082
chr15_25368856_25369173	16.9497	-2.22359	0.585738	-3.79622	0.00014692	0.00914082
chr18_72675351_72675871	54.298	-1.25625	0.330928	-3.79616	0.000146957	0.00914082
chr2_219460353_219461607	735.228	0.667202	0.175765	3.796	0.000147049	0.00914082
chr12_76719799_76720404	27.3137	-1.77195	0.466824	-3.79575	0.0001472	0.00914559
chr5_163511752_163512121	23.6576	-1.82276	0.480265	-3.79531	0.000147457	0.00915695
chr11_133955390_133956392	302.941	0.724833	0.191043	3.79408	0.00014819	0.00919785
chr15_98896907_98897292	29.3687	-1.67608	0.441779	-3.79392	0.000148286	0.00919916
chrX_154347157_154347842	91.2446	1.04577	0.275658	3.79373	0.000148403	0.00920182
chr6_163208800_163209336	109.275	0.96517	0.254438	3.79334	0.000148637	0.0092117
chr6_157764386_157764920	91.5808	-1.0229	0.269674	-3.79309	0.000148785	0.0092162
chr11_91133318_91133698	16.4011	-2.20375	0.581033	-3.79282	0.000148947	0.00922163
chr1_226034392_226034891	65.6641	1.17465	0.309719	3.79263	0.000149057	0.00922384
chr21_39454860_39455829	180.165	0.878769	0.231734	3.79215	0.000149349	0.00923726
chr1_67639397_67639711	16.7529	2.51109	0.662345	3.79121	0.000149917	0.00926773
chr1_200755416_200755705	21.7216	2.04319	0.539001	3.7907	0.000150221	0.00928187
chr5_170132617_170133134	33.1442	-1.54577	0.407861	-3.78996	0.000150674	0.00930447
chr7_138527846_138528431	167.248	0.843159	0.222478	3.78985	0.000150738	0.00930447
chr12_56163530_56163853	53.9602	1.27954	0.337667	3.78935	0.000151039	0.00931375
[truncated: 121,330 more rows]

## Sheet: RNA_counts
Geneid	control.1.rna.star2	control.2.rna.star2	control.3.rna.star2	chir4um.1.rna.star2	chir4um.2.rna.star2	chir4um.3.rna.star2
ENSG00000223972.5	0	0	1	2	0	4
ENSG00000227232.5	32	62	35	72	32	68
ENSG00000278267.1	0	3	2	0	0	2
ENSG00000243485.3	0	0	0	0	0	1
ENSG00000274890.1	0	0	0	0	0	0
ENSG00000237613.2	0	0	0	0	0	0
ENSG00000268020.3	0	0	0	0	0	0
ENSG00000240361.1	0	0	0	0	0	0
ENSG00000186092.4	0	0	0	0	0	0
ENSG00000238009.5	0	0	0	2	1	7
ENSG00000239945.1	0	0	0	0	0	0
ENSG00000233750.3	5	5	8	14	10	14
ENSG00000268903.1	25	21	20	27	23	34
ENSG00000269981.1	29	40	28	31	31	40
ENSG00000239906.1	2	7	0	2	2	5
ENSG00000241860.5	30	32	24	39	36	29
ENSG00000222623.1	2	0	0	1	4	0
ENSG00000241599.1	0	0	0	0	0	0
ENSG00000279928.1	0	2	0	0	1	1
ENSG00000279457.2	32	56	46	64	57	81
ENSG00000273874.1	0	0	0	0	0	0
ENSG00000275135.1	0	0	0	0	0	0
ENSG00000228463.7	5	10	9	10	8	6
ENSG00000241670.3	0	0	0	0	0	0
ENSG00000236679.2	1	0	0	0	0	0
ENSG00000236743.1	4	10	2	6	8	2
ENSG00000236601.1	0	0	0	0	0	0
ENSG00000237094.10	53	67	56	66	72	61
ENSG00000269732.1	0	0	0	0	0	0
ENSG00000278566.1	0	0	0	0	0	0
ENSG00000224813.2	0	0	0	0	0	0
ENSG00000233653.3	0	0	0	0	0	0
ENSG00000250575.1	0	0	0	1	0	0
ENSG00000278757.1	0	0	1	3	1	1
ENSG00000231709.1	0	1	1	0	0	0
ENSG00000235146.2	0	0	0	0	0	0
ENSG00000239664.2	0	0	0	0	0	0
ENSG00000230021.6	6	10	5	8	7	4
ENSG00000223659.1	0	0	0	0	0	0
ENSG00000225972.1	194	186	177	167	178	190
ENSG00000225630.1	2201	2720	2331	1898	1787	1823
ENSG00000276171.1	9	11	9	24	26	16
ENSG00000237973.1	4471	4891	4574	5480	5784	5293
ENSG00000278791.1	0	0	0	0	0	0
ENSG00000229344.1	399	413	403	410	482	400
ENSG00000240409.1	1	6	2	2	3	0
ENSG00000248527.1	1576	1842	1562	1288	1254	1439
ENSG00000198744.5	374	383	356	363	391	331
ENSG00000268663.1	0	0	0	0	0	0
ENSG00000273547.1	0	0	0	0	0	0
ENSG00000229376.3	0	3	4	2	3	3
ENSG00000224956.5	1	5	5	4	4	1
ENSG00000235373.1	11	15	6	11	9	9
ENSG00000223181.1	0	0	1	1	0	3
ENSG00000240618.1	32	38	28	45	31	40
ENSG00000229905.1	1	0	0	1	0	0
ENSG00000228327.2	38	35	28	39	27	44
ENSG00000237491.7	29	31	30	36	28	39
ENSG00000230092.6	7	25	11	11	7	10
ENSG00000177757.2	5	3	10	5	17	11
ENSG00000228794.7	473	554	494	482	418	506
ENSG00000225880.5	7	9	7	6	3	13
ENSG00000230368.2	0	0	2	2	0	0
ENSG00000234711.1	0	0	0	0	0	0
ENSG00000272438.1	0	1	1	0	1	0
ENSG00000230699.2	4	5	1	0	0	2
ENSG00000241180.1	1	0	0	0	0	0
ENSG00000223764.2	12	7	8	14	6	7
ENSG00000187634.9	27	14	19	7	7	13
ENSG00000188976.9	836	837	824	837	751	698
ENSG00000187961.12	67	66	61	58	40	70
ENSG00000277294.1	0	0	0	0	0	0
ENSG00000187583.9	14	5	4	0	2	0
ENSG00000187642.8	3	3	1	1	3	0
ENSG00000272512.1	18	18	23	8	0	3
ENSG00000188290.9	323	281	285	109	107	124
ENSG00000187608.7	152	122	126	77	62	86
ENSG00000231702.2	0	0	0	0	0	0
ENSG00000224969.1	2	7	5	3	1	2
ENSG00000188157.12	4797	4494	4786	2513	2829	2070
ENSG00000242590.1	0	0	0	0	0	0
ENSG00000217801.8	5	12	3	5	8	5
ENSG00000273443.1	0	0	0	0	1	0
ENSG00000237330.2	0	0	0	0	0	0
ENSG00000131591.16	95	97	76	82	90	82
ENSG00000223823.1	0	0	0	0	0	0
ENSG00000207730.2	0	0	0	0	0	0
ENSG00000207607.2	0	0	0	0	0	0
ENSG00000198976.1	0	0	0	0	0	0
ENSG00000272141.1	0	0	0	0	0	0
ENSG00000205231.1	0	0	1	0	0	0
ENSG00000162571.12	1	1	0	0	0	0
ENSG00000186891.12	0	3	0	0	0	0
ENSG00000186827.9	1	2	0	4	2	1
ENSG00000078808.15	2069	2082	1914	1452	1381	1228
ENSG00000176022.4	611	706	691	650	628	523
ENSG00000184163.3	17	29	28	4	6	7
ENSG00000260179.1	8	6	12	0	3	1
ENSG00000160087.19	592	684	685	842	687	664
ENSG00000230415.1	4	2	1	8	5	9
ENSG00000162572.18	35	28	24	49	34	54
ENSG00000131584.17	479	570	514	726	526	596
ENSG00000278073.1	0	0	0	0	0	0
ENSG00000169972.10	76	94	96	84	57	86
ENSG00000127054.17	1212	1306	1175	1542	1473	1452
ENSG00000274153.1	0	0	0	0	0	0
ENSG00000240731.1	18	23	23	18	6	25
ENSG00000224051.5	505	431	455	506	517	490
ENSG00000169962.4	24	20	25	47	20	31
ENSG00000107404.16	825	976	793	1009	958	977
ENSG00000275884.1	0	0	0	0	0	1
ENSG00000162576.15	478	484	567	121	169	159
ENSG00000175756.12	319	463	353	408	398	393
ENSG00000223663.2	0	0	0	0	2	0
ENSG00000221978.10	698	825	722	1147	754	1117
ENSG00000224870.5	103	99	75	125	99	91
ENSG00000242485.4	793	891	857	1049	1098	910
ENSG00000264293.2	0	0	0	0	0	0
ENSG00000272455.1	32	21	29	18	22	21
ENSG00000235098.7	0	4	1	2	0	2
ENSG00000225905.1	0	1	0	0	0	0
ENSG00000205116.3	1	2	0	0	1	3
ENSG00000225285.1	2	1	3	52	49	48
ENSG00000179403.11	141	130	141	384	407	387
ENSG00000215915.8	4	4	1	6	2	14
ENSG00000160072.18	107	144	99	170	121	186
ENSG00000197785.12	400	428	365	383	376	339
ENSG00000205090.7	23	22	20	22	16	23
ENSG00000160075.11	1533	1574	1452	1850	1840	1513
ENSG00000215014.4	26	16	13	26	16	18
ENSG00000279244.1	0	0	0	0	0	0
ENSG00000274481.1	0	0	0	0	0	0
ENSG00000280747.1	0	0	0	0	0	0
ENSG00000228594.3	370	328	369	175	192	157
ENSG00000272106.1	236	258	231	183	206	194
ENSG00000197530.11	586	630	603	671	704	657
ENSG00000189409.11	388	364	347	92	97	127
ENSG00000248333.6	412	535	516	428	470	450
ENSG00000272004.1	0	0	0	0	0	1
ENSG00000189339.10	1537	1755	1599	1849	1800	1622
ENSG00000269737.1	17	14	20	17	13	18
ENSG00000269227.1	1	6	8	9	6	6
ENSG00000215914.4	3	5	3	5	1	4
ENSG00000008128.21	8	12	15	14	8	14
ENSG00000268575.1	120	113	130	92	92	84
ENSG00000227775.3	203	218	231	155	188	172
ENSG00000215790.5	155	183	227	129	171	144
ENSG00000008130.14	1011	1087	971	1068	912	975
ENSG00000078369.16	9040	10221	10122	10491	10389	8623
ENSG00000231050.1	20	26	15	15	20	20
ENSG00000169885.8	1	0	1	0	1	0
ENSG00000178821.11	6	0	5	9	10	9
ENSG00000142609.16	5	2	1	0	2	1
ENSG00000233542.1	0	0	0	0	0	0
ENSG00000187730.7	0	2	1	3	0	1
ENSG00000226969.1	0	0	0	0	1	1
ENSG00000067606.14	288	295	304	257	278	231
ENSG00000271806.1	3	1	2	2	4	4
ENSG00000182873.5	92	89	88	44	49	29
ENSG00000162585.15	874	866	811	1129	1262	878
ENSG00000234396.3	1	0	0	0	0	0
ENSG00000277082.1	0	0	0	0	0	0
ENSG00000157933.9	3067	3070	3139	3015	3144	2437
ENSG00000116151.12	111	154	124	155	134	203
ENSG00000272161.1	2	2	0	0	0	0
ENSG00000269896.2	35	31	23	18	26	25
ENSG00000272420.1	10	22	12	29	14	19
ENSG00000157916.17	752	885	910	775	648	652
ENSG00000157911.8	292	319	269	242	283	256
ENSG00000149527.16	16	25	26	29	23	29
ENSG00000224387.1	0	0	0	2	0	1
ENSG00000229393.1	1	0	4	2	1	4
ENSG00000157881.12	540	590	547	674	647	651
ENSG00000197921.5	3	2	0	2	0	0
ENSG00000272449.1	1	1	0	0	0	0
ENSG00000238164.5	0	0	1	0	1	0
ENSG00000157873.16	7	11	15	9	5	7
ENSG00000225931.3	0	0	0	0	0	0
ENSG00000228037.1	0	0	0	1	1	0
ENSG00000157870.13	271	311	287	295	267	304
ENSG00000142606.14	1	0	0	0	0	0
ENSG00000237058.1	0	0	0	0	0	0
ENSG00000215912.10	22	15	24	10	12	16
ENSG00000233234.1	0	0	0	0	0	0
ENSG00000231630.1	0	0	0	0	0	0
ENSG00000169717.6	0	0	0	0	0	0
ENSG00000177133.9	321	334	267	712	646	644
ENSG00000142611.15	1362	1417	1273	2166	2283	1953
ENSG00000226286.1	6	9	3	14	12	8
ENSG00000279839.1	11	13	19	27	21	22
ENSG00000272235.1	53	45	51	83	69	65
ENSG00000130762.13	33	16	30	7	4	8
ENSG00000272088.1	1	5	3	0	1	3
ENSG00000162591.14	812	669	684	35	31	35
ENSG00000207776.1	0	0	1	0	0	0
ENSG00000238260.1	0	0	0	0	0	0
ENSG00000158109.13	1031	1233	1140	541	577	480
ENSG00000116213.14	150	180	163	202	217	182
ENSG00000078900.13	5	3	5	37	25	14
ENSG00000227589.1	0	0	0	0	0	0
ENSG00000235131.1	0	0	0	0	0	0
ENSG00000227372.9	546	654	583	803	728	666
ENSG00000276189.1	0	0	0	0	0	0
ENSG00000162592.7	13	16	12	18	10	13
ENSG00000235169.6	29	40	23	36	24	22
ENSG00000130764.8	1727	2140	1823	2024	2177	1807
ENSG00000266075.2	2	0	1	3	0	2
ENSG00000272153.1	3	7	4	11	9	8
ENSG00000116198.11	862	1038	916	987	1030	764
ENSG00000169598.14	52	43	52	51	60	46
ENSG00000198912.9	294	288	356	292	263	245
ENSG00000236423.4	12	11	8	10	6	13
ENSG00000233304.4	0	0	0	0	0	0
ENSG00000226374.1	0	0	0	0	0	0
ENSG00000229280.1	0	0	0	0	0	0
ENSG00000235054.1	0	0	0	0	0	0
ENSG00000227169.2	0	0	0	0	0	0
ENSG00000232596.1	0	0	0	0	0	0
ENSG00000196581.9	2	6	4	6	5	3
ENSG00000277731.1	0	0	0	0	0	0
ENSG00000231510.1	0	0	0	0	0	0
ENSG00000260972.1	0	0	0	0	0	0
ENSG00000264341.1	0	1	0	0	0	0
ENSG00000236948.1	0	0	0	0	0	0
ENSG00000216045.2	0	0	0	0	0	0
ENSG00000264101.1	1	1	0	0	0	0
ENSG00000131697.16	165	133	139	191	170	176
ENSG00000266687.1	0	0	0	0	0	0
ENSG00000069424.13	137	164	139	65	74	67
ENSG00000116254.16	47	49	29	6	8	4
ENSG00000116251.8	2098	2344	2086	4313	3757	3135
ENSG00000226944.1	8	6	7	1	2	5
ENSG00000158286.11	1244	1544	1211	1454	939	1630
ENSG00000116237.14	1469	1648	1716	2094	1812	1689
ENSG00000225077.2	0	0	0	1	1	0
ENSG00000173673.7	0	0	0	0	0	0
ENSG00000158292.6	247	199	271	113	148	105
ENSG00000097021.18	462	485	434	574	543	502
ENSG00000271746.1	0	0	0	0	0	0
ENSG00000069812.10	4	2	4	1	0	0
ENSG00000187017.13	1	0	0	0	2	1
ENSG00000265392.1	0	0	0	0	0	0
ENSG00000231868.1	0	0	0	3	0	0
ENSG00000215788.8	34	30	43	25	19	22
ENSG00000171680.19	241	268	235	166	150	157
ENSG00000162408.10	1554	1713	1625	1681	1740	1442
ENSG00000253022.1	3	2	4	9	6	1
ENSG00000229519.2	12	14	8	9	7	11
ENSG00000173662.18	4	1	5	4	4	8
ENSG00000204859.10	159	213	153	232	178	208
ENSG00000162413.15	1935	2069	1859	1943	1772	1689
ENSG00000116273.5	1011	1088	1013	1148	1163	1036
ENSG00000041988.14	162	208	191	243	239	199
ENSG00000007923.14	578	663	618	640	566	559
ENSG00000228750.4	0	0	0	0	0	0
ENSG00000237436.1	4	5	0	5	5	5
ENSG00000171735.17	725	857	717	649	643	611
ENSG00000227950.1	3	7	5	2	3	7
ENSG00000237365.1	0	0	0	0	0	0
ENSG00000207056.1	0	0	0	0	0	0
ENSG00000280801.1	0	0	0	0	0	0
ENSG00000237402.1	0	1	0	0	0	0
ENSG00000237728.2	1	0	0	0	0	0
ENSG00000225126.1	0	0	0	1	0	1
ENSG00000270171.1	0	0	0	0	0	0
ENSG00000270035.1	0	0	0	0	0	0
ENSG00000269978.1	2	0	1	0	0	0
ENSG00000049245.11	2905	3382	3471	3588	3506	2914
ENSG00000269925.1	18	8	18	19	6	16
ENSG00000049246.13	449	506	429	376	453	386
ENSG00000236266.1	0	0	1	2	1	1
ENSG00000049247.12	0	0	0	0	0	0
ENSG00000049249.7	116	113	133	1	3	2
ENSG00000270330.1	0	0	0	0	0	0
ENSG00000116288.11	696	734	693	733	706	656
ENSG00000200344.1	2	0	0	0	1	0
ENSG00000116285.11	855	1009	1128	293	261	247
ENSG00000238290.1	1	0	1	0	0	0
ENSG00000232848.1	0	0	0	0	0	0
ENSG00000229305.1	0	0	0	0	0	0
ENSG00000200975.1	0	0	0	0	0	0
ENSG00000227634.1	0	0	0	0	0	0
ENSG00000233645.1	0	0	0	0	0	0
ENSG00000251977.1	0	0	0	0	0	0
ENSG00000162426.13	46	69	52	37	24	17
ENSG00000252254.1	0	1	1	0	0	0
ENSG00000142599.16	7818	8406	8310	8172	8186	6190
ENSG00000232912.4	6	7	7	15	12	8
ENSG00000221083.1	0	0	0	0	0	1
ENSG00000270282.1	1	3	1	2	0	2
ENSG00000280851.1	0	0	0	0	0	0
ENSG00000234619.1	1	3	4	5	1	2
ENSG00000224315.2	4	3	4	5	8	1
ENSG00000222511.2	5	6	2	1	2	2
ENSG00000226545.1	2	4	1	7	4	1
ENSG00000228423.2	0	0	2	3	2	0
ENSG00000229716.2	0	0	0	0	0	0
ENSG00000074800.12	6999	7584	7894	13186	9876	13772
ENSG00000280816.1	7	5	4	4	5	18
ENSG00000274258.1	0	0	0	0	1	0
ENSG00000236269.1	16	19	11	35	22	48
ENSG00000230679.1	3	1	0	0	1	2
ENSG00000201725.1	0	0	0	0	0	0
ENSG00000238249.2	1	4	1	5	5	3
ENSG00000232208.2	0	0	0	0	0	1
ENSG00000232663.2	0	0	0	0	0	0
ENSG00000131686.13	0	0	0	0	0	0
ENSG00000265141.2	3	0	0	0	0	0
ENSG00000197241.3	0	0	0	0	0	0
ENSG00000142583.16	8	5	8	27	25	4
ENSG00000252404.1	0	0	0	0	0	0
ENSG00000281506.1	0	0	0	0	0	0
ENSG00000180758.11	143	182	174	144	106	155
ENSG00000207865.1	1	1	1	1	0	3
ENSG00000228526.2	11	22	14	7	3	6
ENSG00000234546.2	38	51	36	9	22	14
ENSG00000049239.11	1891	2050	1970	1486	1574	1330
ENSG00000171621.12	185	167	197	27	20	16
ENSG00000252956.1	0	0	0	0	0	0
ENSG00000235263.1	0	0	0	0	0	0
ENSG00000171612.6	129	132	140	178	158	133
ENSG00000231181.1	2	2	0	2	4	3
ENSG00000188807.11	528	581	529	680	614	605
ENSG00000171608.14	316	317	294	162	166	136
ENSG00000179840.5	1	1	0	0	0	0
ENSG00000233268.3	0	0	0	0	0	0
ENSG00000231789.2	23	19	27	41	28	31
ENSG00000171603.15	3883	3815	3716	2866	2671	2426
ENSG00000271264.1	3	1	1	3	1	0
ENSG00000280113.1	0	2	0	0	0	0
ENSG00000178585.13	653	808	670	883	784	800
ENSG00000223989.1	0	0	0	0	0	0
ENSG00000162441.10	876	1052	952	1263	1121	1048
ENSG00000228150.1	13	12	12	9	17	17
ENSG00000173614.12	352	385	338	212	235	231
ENSG00000202415.1	2	8	5	10	4	8
ENSG00000265521.1	0	1	2	1	0	1
ENSG00000241326.1	0	0	0	0	0	0
ENSG00000162444.11	9	19	2	4	4	3
ENSG00000130939.17	2943	3270	3016	3181	3355	2922
ENSG00000224340.1	1	1	1	3	1	3
ENSG00000233623.2	1	0	1	2	0	0
ENSG00000201746.1	2	3	1	2	1	2
ENSG00000054523.15	6156	7035	6708	8316	8476	7629
ENSG00000264881.1	0	1	0	0	0	0
ENSG00000199562.1	5	6	9	7	6	5
ENSG00000264501.2	0	0	0	0	0	0
ENSG00000142657.19	1204	1231	1218	2032	1855	1701
ENSG00000271989.1	0	0	0	1	0	0
ENSG00000251503.6	7	4	7	6	3	5
ENSG00000175279.20	6	11	11	11	10	10
ENSG00000241563.3	8	12	9	9	5	8
ENSG00000160049.10	1753	2014	1879	1880	1806	1775
ENSG00000203469.2	0	0	0	0	0	0
ENSG00000142655.11	461	506	500	484	465	461
ENSG00000243267.3	1	1	0	2	2	1
ENSG00000130940.13	3273	3529	2802	2996	2884	2670
ENSG00000272078.1	20	27	27	47	38	67
ENSG00000225158.2	0	0	0	0	0	0
ENSG00000175262.13	12	11	10	7	4	9
ENSG00000215785.2	0	1	0	0	0	2
ENSG00000264181.1	0	0	0	0	0	0
ENSG00000281322.1	0	0	0	0	0	0
ENSG00000120948.14	1078	1340	1269	1919	1591	1495
ENSG00000277726.3	0	1	0	0	0	0
ENSG00000009724.15	30	48	37	102	56	104
ENSG00000271895.2	12	14	17	29	30	37
ENSG00000116649.8	1253	1231	1226	1017	1142	951
ENSG00000171824.12	1366	1450	1319	1794	1819	1565
ENSG00000226849.1	2	5	4	4	2	4
ENSG00000281350.1	1	4	0	5	2	2
ENSG00000230337.1	0	1	5	4	5	5
ENSG00000198793.11	3327	3857	3549	3357	3318	2938
ENSG00000225602.4	2	1	3	2	3	2
ENSG00000253086.1	0	1	0	1	2	2
ENSG00000171819.4	14	16	16	15	4	15
ENSG00000207451.1	1	2	4	2	1	2
ENSG00000238173.1	2	1	0	1	2	6
ENSG00000120942.12	411	449	462	560	598	474
ENSG00000238199.1	1	5	4	5	3	7
ENSG00000224338.2	0	0	0	0	0	0
ENSG00000204624.7	8	5	2	0	3	2
ENSG00000235643.1	0	0	0	0	0	0
ENSG00000116661.9	121	107	99	26	22	11
ENSG00000132879.12	199	226	229	266	249	252
ENSG00000116663.9	92	114	85	31	49	45
ENSG00000116670.13	317	328	320	473	462	416
ENSG00000162490.6	8	8	8	12	2	6
ENSG00000177674.14	373	417	376	360	363	289
ENSG00000215910.6	1	0	0	0	0	1
ENSG00000177553.6	0	0	0	0	0	0
ENSG00000177000.9	1635	1906	1682	1479	1386	1391
ENSG00000011021.20	1150	1435	1259	2093	1962	1827
ENSG00000242349.4	2	3	1	0	3	4
ENSG00000276470.1	0	0	0	0	0	0
ENSG00000278852.1	0	0	0	0	0	0
ENSG00000175206.9	6110	8104	7634	540	462	551
ENSG00000275915.1	0	0	0	0	0	0
ENSG00000120937.8	2294	2876	2414	53	95	83
ENSG00000224904.1	0	0	0	0	0	0
ENSG00000199347.1	10	18	12	11	18	15
ENSG00000201801.1	2	8	6	2	1	5
ENSG00000116685.14	972	1074	1042	1190	1075	938
ENSG00000083444.15	3345	3321	3713	4114	3522	3310
ENSG00000116688.15	8733	10664	9092	8360	8033	7866
ENSG00000270914.1	0	0	0	0	0	0
ENSG00000116691.9	238	295	247	325	333	269
ENSG00000202461.1	4	6	8	9	6	10
ENSG00000276869.1	0	0	0	0	0	0
ENSG00000243539.3	0	0	0	0	0	0
ENSG00000120949.13	8	9	9	0	0	0
ENSG00000281342.1	0	0	0	0	0	0
ENSG00000201135.1	0	0	0	0	0	0
ENSG00000227875.2	0	0	0	0	0	0
ENSG00000275459.1	0	0	0	0	0	0
ENSG00000028137.15	66	66	75	50	47	32
ENSG00000263676.1	0	0	0	0	0	0
ENSG00000225196.2	0	0	0	0	0	0
ENSG00000252969.1	0	0	0	0	0	0
ENSG00000048707.12	8187	9176	7826	4976	4628	4973
ENSG00000280999.1	0	7	3	6	5	0
ENSG00000239149.1	63	72	94	58	35	45
ENSG00000229484.1	4	2	0	0	0	2
ENSG00000162496.7	5698	6558	6155	4201	4299	3969
ENSG00000221340.1	9	12	9	6	5	10
ENSG00000276830.1	2	4	1	1	0	5
ENSG00000272482.1	236	272	236	187	177	197
ENSG00000204518.2	2	7	3	5	3	4
ENSG00000226166.2	0	0	0	0	0	0
ENSG00000188984.10	0	0	0	0	0	0
ENSG00000157330.8	4	1	2	1	0	0
ENSG00000116726.4	0	0	0	0	0	0
ENSG00000116721.9	0	0	0	0	0	0
ENSG00000228338.1	0	0	0	0	0	0
ENSG00000239810.3	0	0	0	0	0	0
ENSG00000279195.1	0	0	0	0	0	0
ENSG00000231103.2	0	0	0	0	0	0
ENSG00000179172.8	0	0	3	1	2	1
ENSG00000120952.4	0	0	0	0	0	0
ENSG00000243073.3	0	0	0	0	0	0
ENSG00000187545.5	0	0	0	0	0	0
ENSG00000204510.4	0	0	0	0	0	0
ENSG00000207434.1	0	0	0	0	0	0
ENSG00000234064.1	0	0	0	0	0	0
ENSG00000232423.4	0	0	0	0	0	0
ENSG00000274178.2	0	0	0	0	0	0
ENSG00000274764.3	0	0	0	0	0	0
ENSG00000280267.2	0	0	0	0	0	0
ENSG00000229571.5	0	0	0	0	0	0
ENSG00000277058.2	0	0	0	0	0	0
ENSG00000277862.1	0	0	0	0	0	0
ENSG00000236179.1	0	0	0	0	0	0
ENSG00000275774.2	0	0	0	0	0	0
ENSG00000229978.1	0	0	0	0	0	0
ENSG00000233336.1	0	0	0	0	0	0
ENSG00000179412.10	0	0	0	0	0	0
ENSG00000204505.4	0	0	0	0	0	0
ENSG00000279169.1	0	0	0	0	0	0
ENSG00000279804.1	0	0	0	0	0	0
ENSG00000250894.1	0	0	0	0	0	0
ENSG00000270601.3	0	0	0	0	0	0
ENSG00000231219.1	0	0	0	0	0	0
ENSG00000207511.1	0	0	0	0	0	0
ENSG00000182330.9	0	0	0	0	0	0
ENSG00000204501.5	0	0	0	0	0	0
ENSG00000237700.1	0	0	0	0	0	0
ENSG00000228229.2	0	0	0	0	0	0
ENSG00000204481.7	0	0	0	0	0	0
ENSG00000204480.7	0	0	0	0	0	0
ENSG00000204479.4	0	0	0	0	0	0
ENSG00000204478.8	0	0	0	0	0	0
ENSG00000162494.5	0	0	0	0	0	0
ENSG00000259961.1	0	0	0	0	0	0
ENSG00000215909.3	0	0	0	0	0	0
ENSG00000162493.15	640	723	706	448	468	435
ENSG00000222952.1	0	0	0	1	0	0
ENSG00000266358.1	0	0	0	0	0	0
ENSG00000237445.2	0	0	0	0	0	0
ENSG00000253085.1	0	1	1	0	0	0
ENSG00000116731.21	1960	2268	2154	2077	2186	1818
ENSG00000252151.1	0	0	0	0	0	0
ENSG00000231606.1	0	0	0	0	0	0
ENSG00000234593.1	0	0	0	0	0	0
ENSG00000189337.14	263	265	289	79	86	62
ENSG00000280763.1	1	3	1	0	0	2
ENSG00000235829.1	0	6	2	3	1	4
ENSG00000175147.10	1	6	5	172	131	157
ENSG00000171729.12	116	126	142	696	707	686
ENSG00000204464.6	6	2	5	18	16	33
ENSG00000215720.4	2	1	0	17	12	12
ENSG00000278480.1	0	1	1	3	3	3
ENSG00000142621.18	7	1	4	11	21	8
ENSG00000233485.1	0	0	1	0	2	0
ENSG00000236045.1	2	0	0	0	0	0
ENSG00000228140.1	0	0	0	4	0	0
ENSG00000142634.11	121	130	144	164	123	113
ENSG00000162438.10	0	0	0	0	0	0
ENSG00000142615.7	0	1	0	1	1	0
ENSG00000215704.8	1	0	1	3	0	5
ENSG00000132906.16	305	383	326	422	384	373
ENSG00000116138.11	1582	1849	1882	1917	1993	1605
ENSG00000251866.1	0	0	0	4	1	2
ENSG00000272510.1	0	0	0	0	1	0
ENSG00000116771.5	14	13	18	7	7	9
ENSG00000237301.1	1	1	0	5	1	3
ENSG00000235084.3	1	0	3	2	1	2
ENSG00000252417.1	0	0	0	0	0	0
ENSG00000236500.1	0	0	0	0	0	0
ENSG00000197312.10	1237	1252	1242	1316	1221	1136
ENSG00000215695.1	0	0	0	0	0	0
ENSG00000271742.1	0	0	1	3	2	0
ENSG00000116786.10	2243	2565	2332	2361	2455	2033
ENSG00000264048.1	0	0	0	0	0	0
ENSG00000237938.4	19	14	18	42	13	39
ENSG00000162461.7	8	15	15	27	24	21
ENSG00000224459.1	3	4	3	0	1	0
ENSG00000162460.6	0	1	3	1	0	1
ENSG00000162458.11	6199	5677	5411	2973	3007	2352
ENSG00000280788.1	2	1	0	2	0	5
ENSG00000224321.1	1	1	1	3	4	0
ENSG00000233954.6	285	362	359	557	490	560
ENSG00000178715.8	23	27	18	41	33	44
ENSG00000179743.3	111	114	125	136	156	127
ENSG00000065526.9	3429	3584	3584	3698	3650	3102
ENSG00000270620.1	0	0	1	1	0	0
ENSG00000116809.10	293	309	318	404	423	373
ENSG00000234607.2	5	1	3	4	2	8
ENSG00000231353.1	0	0	0	0	0	0
ENSG00000275503.1	0	0	0	0	0	0
ENSG00000224966.4	0	0	0	0	0	0
ENSG00000183888.4	0	0	0	2	1	6
ENSG00000233078.1	0	0	0	0	0	0
ENSG00000173641.16	51265	60874	52233	67163	65402	68663
ENSG00000186510.10	17	14	6	32	14	18
ENSG00000232456.1	3	1	1	5	2	2
ENSG00000184908.16	42	35	47	81	53	75
ENSG00000185519.8	74	89	58	50	38	52
ENSG00000142627.12	2676	2670	2514	1655	1582	1209
ENSG00000227959.1	9	12	11	6	7	3
ENSG00000224621.1	4	4	5	0	2	5
ENSG00000142632.15	11	13	16	18	10	15
ENSG00000234166.1	0	0	0	0	0	0
ENSG00000237276.7	6	4	2	5	5	3
ENSG00000132881.10	80	83	78	78	84	81
ENSG00000233929.1	2	4	0	1	2	2
ENSG00000037637.9	1314	1457	1452	1312	1463	1068
ENSG00000055070.15	2346	2560	2381	2667	2438	2146
ENSG00000226457.1	20	20	7	16	23	24
ENSG00000187144.10	7	8	6	8	7	6
ENSG00000281598.1	0	0	0	0	0	0
ENSG00000157191.18	515	503	488	226	232	231
ENSG00000226029.1	29	34	22	26	27	13
ENSG00000080947.13	43	65	60	90	62	80
ENSG00000206652.1	10	5	6	5	2	6
ENSG00000261135.1	1	0	2	1	4	0
ENSG00000224174.2	1	0	0	1	1	0
ENSG00000233421.4	4	5	6	3	6	7
ENSG00000277344.1	0	0	0	0	0	0
ENSG00000268991.2	0	0	0	0	0	0
ENSG00000225710.1	0	0	0	0	0	0
ENSG00000266584.1	0	0	0	0	0	0
ENSG00000219481.9	585	736	652	900	1008	743
ENSG00000271732.1	0	1	1	0	0	2
ENSG00000215908.6	85	119	78	162	117	120
ENSG00000186301.8	2	3	7	5	2	7
ENSG00000207513.1	0	1	0	0	0	1
ENSG00000237847.2	0	0	0	0	0	0
ENSG00000280114.1	0	0	0	1	0	0
ENSG00000264742.1	0	0	0	0	0	0
ENSG00000236698.1	16	30	21	29	35	15
ENSG00000268869.4	0	1	0	0	0	0
ENSG00000279151.1	0	0	0	0	0	0
ENSG00000279132.1	0	0	0	0	0	0
ENSG00000058453.15	126	135	133	58	64	77
ENSG00000207389.1	0	1	2	0	0	0
ENSG00000227684.1	2	1	1	0	1	1
ENSG00000186715.9	3	7	4	8	4	5
ENSG00000223643.5	0	0	0	0	0	0
ENSG00000230239.1	1	0	0	0	1	0
ENSG00000263811.1	0	0	0	0	0	0
ENSG00000228549.3	31	17	25	37	31	21
ENSG00000277234.1	0	0	0	0	0	0
ENSG00000238142.1	7	12	6	7	2	5
ENSG00000235241.1	0	0	0	0	0	0
ENSG00000207005.1	1	1	1	1	0	1
ENSG00000272426.1	0	1	1	2	3	3
ENSG00000117122.12	1343	1392	1379	448	428	389
ENSG00000226526.1	1	3	0	0	1	0
ENSG00000159363.16	1404	1380	1454	763	853	668
ENSG00000117118.8	903	1155	1032	1426	1358	1388
ENSG00000117115.11	260	244	347	21	16	28
ENSG00000281330.1	0	0	0	0	0	0
ENSG00000204362.5	1	0	1	0	0	2
ENSG00000142623.9	1	0	2	1	0	0
ENSG00000142619.4	0	0	0	0	0	0
ENSG00000266634.1	0	0	0	0	0	0
ENSG00000159339.12	0	0	0	0	0	0
ENSG00000280226.1	0	0	0	0	0	0
ENSG00000276747.1	0	0	0	0	0	0
ENSG00000179051.12	1346	1304	1375	1102	1039	863
ENSG00000227751.1	0	0	0	0	0	0
ENSG00000266727.1	0	0	0	0	0	0
ENSG00000074964.15	987	1179	872	1175	1173	1061
ENSG00000236648.1	0	0	0	0	0	0
ENSG00000278471.1	0	0	0	0	0	0
ENSG00000117148.7	0	0	0	0	2	0
ENSG00000261781.1	0	0	0	0	0	0
ENSG00000117154.10	1	1	1	2	2	0
ENSG00000280222.1	2	0	0	1	0	0
ENSG00000230035.2	0	0	0	0	0	0
ENSG00000225387.1	0	0	0	0	0	0
ENSG00000179023.8	16	13	17	0	1	1
ENSG00000235282.3	0	0	0	0	0	0
ENSG00000225478.2	0	0	0	0	0	0
ENSG00000009709.10	0	0	0	0	0	0
ENSG00000179002.5	0	0	0	0	0	0
ENSG00000255275.3	2	0	0	0	0	0
ENSG00000159423.15	446	449	361	481	436	478
ENSG00000265606.1	0	0	0	0	0	0
ENSG00000221662.1	0	0	0	0	1	0
ENSG00000169991.9	295	259	251	130	144	102
ENSG00000272084.1	22	11	23	14	9	26
ENSG00000127481.13	19567	20513	19997	17951	18966	16886
ENSG00000230424.1	3	1	1	5	4	4
ENSG00000127463.12	2017	2099	2142	2010	1999	1805
ENSG00000053372.4	248	302	255	355	312	328
ENSG00000211454.12	4	3	4	1	8	3
ENSG00000162482.4	2	3	1	7	7	3
ENSG00000270728.1	70	52	60	53	58	54
ENSG00000053371.11	244	284	265	308	348	266
ENSG00000200403.1	2	1	1	1	2	2
ENSG00000040487.11	160	148	169	159	142	136
ENSG00000077549.16	4264	4714	4597	6579	6761	5212
ENSG00000240490.3	3	2	1	2	3	2
ENSG00000201609.1	0	0	0	0	0	0
ENSG00000235185.1	0	0	0	0	0	1
ENSG00000173436.12	85	105	103	103	109	104
ENSG00000270136.4	1	0	1	0	0	0
ENSG00000226396.1	8	6	7	10	14	4
ENSG00000158747.12	110	94	122	50	71	43
ENSG00000158748.3	1	0	0	3	2	0
ENSG00000162542.12	71	120	99	46	50	38
ENSG00000178828.6	0	0	0	0	0	0
ENSG00000235434.1	0	0	0	0	0	0
ENSG00000169914.5	298	337	358	468	407	388
ENSG00000188784.4	0	0	0	0	0	0
ENSG00000242688.3	0	0	0	0	0	0
ENSG00000188257.9	1	0	0	0	0	0
ENSG00000127472.9	0	0	0	0	1	0
ENSG00000117215.13	0	0	0	0	0	0
ENSG00000158786.4	0	0	0	0	0	0
ENSG00000227066.1	0	0	0	0	0	0
ENSG00000187980.6	0	0	0	0	0	0
ENSG00000225986.1	0	1	0	3	2	0
ENSG00000162543.5	19	19	27	6	5	9
ENSG00000228105.1	0	0	0	0	0	0
ENSG00000158816.14	6	1	2	0	0	0
ENSG00000226664.1	0	0	0	0	0	0
ENSG00000236963.4	0	0	0	0	0	0
ENSG00000226487.1	0	0	0	0	0	0
ENSG00000162545.5	73	96	81	29	23	21
ENSG00000090432.6	747	830	809	613	659	659
ENSG00000215520.3	0	0	0	0	0	0
ENSG00000183114.7	10	7	8	2	9	7
ENSG00000158825.5	3	0	4	2	2	0
ENSG00000158828.5	629	702	663	413	398	342
ENSG00000273695.1	0	0	0	0	0	0
ENSG00000117242.7	239	275	253	136	143	127
ENSG00000244038.8	2504	2815	2657	2333	2339	2048
ENSG00000117245.11	13	17	10	8	0	6
ENSG00000235432.1	0	0	0	0	0	0
ENSG00000189410.10	17	12	15	7	4	7
ENSG00000233069.1	0	0	2	2	1	0
ENSG00000127483.16	2180	2617	2547	3355	2967	2658
ENSG00000075151.18	3653	4197	4056	4661	4491	3864
ENSG00000251914.1	2	0	0	2	1	3
ENSG00000221808.1	1	0	2	2	0	0
ENSG00000233072.1	0	3	1	3	1	1
ENSG00000236073.2	4	2	2	1	1	0
ENSG00000235112.1	6	3	5	7	6	11
ENSG00000117298.13	4319	4088	4309	2887	2987	2226
ENSG00000236936.1	2	2	9	11	3	6
ENSG00000231105.1	8	11	5	2	2	14
ENSG00000236216.5	0	0	0	0	0	0
ENSG00000228823.1	0	0	0	2	0	1
ENSG00000236009.1	0	0	0	0	0	0
ENSG00000227001.3	14	8	8	16	19	11
ENSG00000187952.9	3	2	5	5	2	2
ENSG00000186543.7	0	0	0	0	0	0
ENSG00000142794.17	191	223	196	265	224	191
ENSG00000176378.8	0	0	0	0	0	0
ENSG00000162551.12	6	15	15	2	1	2
ENSG00000233431.1	0	0	0	0	0	0
ENSG00000221781.1	0	0	0	0	0	0
ENSG00000076864.18	60	68	68	90	65	66
ENSG00000090686.14	1649	1941	1844	1913	1707	1697
ENSG00000281866.1	5	0	0	1	1	1
ENSG00000231978.2	1	0	0	0	0	0
ENSG00000187942.10	4	4	2	4	8	1
ENSG00000142798.15	22107	20460	19551	13670	13114	14171
ENSG00000232037.3	6	1	1	8	6	7
ENSG00000219073.6	0	1	0	0	0	0
ENSG00000273610.1	0	0	0	0	0	0
ENSG00000201919.1	0	0	0	0	0	0
ENSG00000142789.18	0	0	0	0	0	0
ENSG00000278124.1	0	0	0	0	0	0
ENSG00000201273.1	0	0	0	0	0	0
ENSG00000228397.1	0	2	1	2	0	2
ENSG00000218510.5	86	117	142	171	153	168
ENSG00000070831.14	8757	10425	10406	11219	11196	8915
ENSG00000230068.2	18	17	12	9	11	20
ENSG00000271428.1	3	3	6	10	7	9
ENSG00000271840.1	16	8	7	6	10	9
ENSG00000162552.13	27	31	30	17	10	15
ENSG00000266564.1	0	0	0	0	0	0
ENSG00000234397.3	0	0	0	0	0	0
ENSG00000279625.1	0	0	0	0	0	0
ENSG00000184677.15	1250	1469	1373	1266	1214	1148
ENSG00000237200.1	4	4	3	4	4	2
ENSG00000070886.9	1	1	0	0	0	1
ENSG00000276835.1	0	0	0	0	0	0
ENSG00000173372.15	6	5	2	3	2	1
ENSG00000159189.10	5	14	15	2	4	10
ENSG00000173369.14	2	3	4	3	1	3
ENSG00000133216.15	1115	1071	1255	844	882	461
ENSG00000265422.1	0	0	0	0	0	0
ENSG00000216157.2	0	0	0	0	0	0
ENSG00000225952.1	0	1	1	1	1	0
ENSG00000264014.1	0	0	0	0	0	0
ENSG00000215906.7	0	0	0	0	0	0
ENSG00000227868.5	0	0	0	0	2	0
ENSG00000004487.14	1652	1851	1706	2420	2349	1939
ENSG00000240553.1	1	1	0	0	1	1
ENSG00000263793.1	0	0	0	0	0	0
ENSG00000266802.1	1	0	1	0	2	1
ENSG00000169641.12	3956	4228	4045	2868	2834	2540
ENSG00000229010.1	1	2	4	0	3	5
ENSG00000206935.1	0	1	3	0	1	1
ENSG00000252578.1	0	0	1	5	4	3
ENSG00000179546.4	5	3	1	5	0	0
ENSG00000215381.3	0	0	0	1	0	0
ENSG00000261326.2	39	39	56	76	54	51
ENSG00000125944.17	1845	2032	2040	3306	2937	2649
ENSG00000125945.13	1360	1651	1495	2304	2439	1628
ENSG00000249087.5	124	114	101	194	180	159
ENSG00000201405.1	0	0	0	0	0	0
ENSG00000271420.1	7	7	5	8	10	15
ENSG00000204219.8	732	935	741	1196	1168	1024
ENSG00000232482.2	8	5	6	15	5	10
ENSG00000088280.17	1081	1293	1248	1278	1178	1232
ENSG00000007968.6	17	7	9	228	196	221
ENSG00000280791.1	0	0	0	0	0	0
ENSG00000235052.1	1	0	2	0	0	1
ENSG00000117318.8	380	312	409	580	431	385
ENSG00000197880.7	0	0	0	0	0	1
ENSG00000229239.2	0	0	0	0	0	0
ENSG00000142676.11	2923	3009	2764	5102	5013	4593
ENSG00000203589.2	1	2	3	0	2	4
ENSG00000011007.11	1783	2076	2079	1900	1918	1584
ENSG00000236810.4	15	23	17	28	15	14
ENSG00000057757.8	682	685	739	842	748	662
ENSG00000011009.9	715	742	683	718	651	563
ENSG00000117308.13	279	249	235	295	235	285
ENSG00000117305.13	313	324	327	192	186	172
ENSG00000179163.11	254	236	304	166	187	151
ENSG00000188822.7	0	0	0	0	1	0
ENSG00000229106.1	0	0	0	0	0	0
ENSG00000232557.3	0	0	0	0	0	0
ENSG00000264926.1	0	0	0	0	0	0
ENSG00000230228.2	0	0	0	0	0	1
ENSG00000189266.10	1091	1292	1250	2151	1892	1605
ENSG00000188529.13	1376	1718	1514	2573	2236	2234
ENSG00000215905.4	0	0	0	0	0	0
ENSG00000225315.2	0	0	1	0	0	0
ENSG00000142661.17	2	2	3	0	3	2
ENSG00000230703.1	0	0	0	0	0	0
ENSG00000142677.3	0	0	0	0	1	3
ENSG00000185436.10	177	216	149	236	203	195
ENSG00000230023.2	0	0	0	0	0	0
ENSG00000221032.3	0	0	0	0	0	0
ENSG00000266511.1	0	0	0	0	0	0
ENSG00000232298.2	0	0	0	0	0	0
ENSG00000158055.14	7	8	12	3	2	2
ENSG00000001460.16	217	225	243	276	288	266
ENSG00000001461.15	1346	1659	1478	376	414	338
ENSG00000117602.10	387	482	417	422	442	381
ENSG00000264443.1	0	0	0	0	0	0
ENSG00000184454.6	2	0	0	11	4	12
ENSG00000227312.2	0	0	0	0	0	0
ENSG00000239106.1	0	0	0	0	0	0
ENSG00000133226.15	3125	3586	3396	4621	4578	4159
ENSG00000169504.13	26490	32427	31145	35832	33396	27947
ENSG00000238482.1	3	2	2	4	6	1
ENSG00000020633.17	5	3	2	6	1	3
ENSG00000278034.1	0	0	0	0	0	0
ENSG00000229162.1	0	0	0	0	0	0
ENSG00000261025.1	0	0	0	0	0	0
ENSG00000264371.1	0	0	0	0	0	0
ENSG00000233755.1	0	0	0	0	0	1
ENSG00000233419.3	0	0	0	0	0	0
ENSG00000231953.1	0	0	0	0	0	0
ENSG00000117614.8	390	571	470	391	385	296
ENSG00000117616.16	345	416	339	560	383	424
ENSG00000272432.1	3	1	3	0	2	1
ENSG00000261349.1	10	7	6	3	5	7
ENSG00000187010.17	13	19	22	7	6	13
ENSG00000224183.1	10	4	2	1	4	1
ENSG00000259984.1	0	1	0	0	0	1
ENSG00000183726.9	1599	1902	1877	1787	1602	1404
ENSG00000188672.15	2	8	1	2	2	3
ENSG00000238084.4	0	6	7	5	4	2
ENSG00000204178.8	699	834	900	806	846	584
ENSG00000157978.10	301	313	377	318	272	266
ENSG00000225643.1	3	2	8	2	2	2
ENSG00000117643.13	3327	3854	3315	1895	1801	1737
ENSG00000233478.1	32	26	32	16	10	13
ENSG00000162430.15	5300	5638	5686	4794	4773	4060
ENSG00000255054.3	0	0	0	0	0	0
ENSG00000228172.4	10	12	12	15	8	12
ENSG00000117640.16	1659	2033	1653	2605	2375	2434
ENSG00000272478.1	0	0	0	0	0	0
ENSG00000127423.9	23	20	19	97	68	85
ENSG00000236528.1	0	1	2	4	2	3
ENSG00000182749.5	190	158	151	59	74	72
ENSG00000207302.1	0	0	0	0	0	0
ENSG00000117632.19	2795	2818	2841	15739	14784	12768
ENSG00000229786.1	0	0	4	6	2	4
ENSG00000223624.1	0	0	0	0	2	3
ENSG00000264021.1	0	0	0	0	0	0
ENSG00000266763.1	0	0	0	0	0	0
ENSG00000158006.12	317	372	378	208	220	170
ENSG00000207237.1	0	0	0	0	0	0
ENSG00000252190.1	0	0	0	0	0	0
ENSG00000252691.1	0	0	0	0	1	1
ENSG00000158008.8	206	241	217	316	282	342
ENSG00000158014.13	20	30	34	16	17	12
ENSG00000158022.6	3282	3747	3248	2394	2287	2227
ENSG00000265320.1	0	0	0	0	0	0
ENSG00000175087.8	263	294	328	390	397	383
ENSG00000197245.4	11	11	17	12	16	6
ENSG00000142684.7	8	4	10	13	11	19
ENSG00000236782.4	1	0	0	0	0	1
ENSG00000142675.16	92	113	92	58	53	48
ENSG00000188782.6	0	0	0	0	0	0
ENSG00000236155.5	0	5	3	2	1	6
ENSG00000278572.1	0	0	0	0	0	0
ENSG00000130695.12	389	496	422	854	682	758
ENSG00000270733.1	2	7	3	2	5	7
ENSG00000142669.12	1147	1080	1365	404	492	376
ENSG00000158062.19	79	84	67	199	156	104
ENSG00000169442.7	8	4	6	5	5	1
ENSG00000176092.12	1	0	1	0	0	0
ENSG00000225854.2	0	0	0	1	0	0
ENSG00000176083.16	0	0	0	0	0	0
ENSG00000131914.9	1	1	0	0	0	0
ENSG00000117682.15	866	1018	919	732	818	752
ENSG00000223583.1	7	1	2	3	9	6
ENSG00000225891.1	5	10	10	11	3	4
ENSG00000198830.9	3557	4150	4017	9775	9702	7251
ENSG00000224129.1	0	0	0	0	0	0
ENSG00000117676.12	216	240	218	226	184	245
ENSG00000238705.1	0	0	0	0	0	0
ENSG00000243905.3	0	0	0	0	0	0
ENSG00000252802.1	0	0	0	0	0	0
ENSG00000252429.2	0	0	0	0	0	0
ENSG00000229247.2	0	0	0	0	0	0
ENSG00000238316.1	0	0	0	0	0	0
ENSG00000235069.2	0	0	0	0	0	0
ENSG00000260063.1	13	18	19	26	36	25
ENSG00000117713.16	8546	8964	8591	9180	9435	7587
ENSG00000060642.9	155	158	152	153	126	122
ENSG00000241188.3	0	0	0	1	0	0
ENSG00000204160.10	516	516	489	529	515	454
ENSG00000175793.11	2	1	2	1	2	2
ENSG00000142751.13	677	830	722	623	664	565
ENSG00000226698.1	0	0	0	0	0	0
ENSG00000198746.11	134	130	136	127	111	106
ENSG00000090273.12	787	809	733	925	842	759
ENSG00000131910.4	0	0	0	0	0	2
ENSG00000175707.8	7	6	2	3	1	1
ENSG00000172746.6	0	1	0	0	1	0
ENSG00000224064.1	0	0	0	0	0	0
ENSG00000225294.1	0	0	0	0	0	0
ENSG00000253368.3	427	536	480	183	184	197
ENSG00000158246.7	41	29	37	28	28	30
ENSG00000280403.1	1	0	0	0	0	0
ENSG00000090020.9	927	972	1118	608	699	527
ENSG00000229985.2	0	0	0	0	0	0
ENSG00000214973.3	2	0	4	0	0	1
ENSG00000225159.1	2	2	0	1	1	3
ENSG00000225990.2	0	0	0	0	0	0
ENSG00000224311.1	0	0	0	0	0	0
ENSG00000142784.14	2281	2391	2245	1722	1746	1517
ENSG00000252098.1	0	2	3	1	1	2
ENSG00000243659.1	7	5	6	6	4	9
ENSG00000186501.13	547	645	588	676	586	536
ENSG00000206888.1	1	1	1	3	0	3
ENSG00000241547.1	1	3	7	9	4	4
ENSG00000281023.1	0	0	0	0	0	0
ENSG00000142765.16	42	47	44	32	24	25
ENSG00000142733.13	251	296	234	270	233	257
ENSG00000142748.11	1	1	1	0	0	0
ENSG00000174950.9	0	0	2	0	0	0
ENSG00000231207.1	0	0	0	0	0	2
ENSG00000181773.6	33	27	28	18	22	28
ENSG00000158195.9	5711	5716	6041	5327	5824	4498
ENSG00000241169.1	3	1	0	2	1	4
ENSG00000237429.1	7	11	4	15	11	18
ENSG00000126705.12	2829	2896	2668	3688	4025	2980
ENSG00000000938.11	22	34	31	10	7	9
ENSG00000235912.1	2	0	1	0	0	1
ENSG00000233975.1	0	0	0	0	0	0
ENSG00000126709.13	597	585	443	250	230	229
ENSG00000225886.2	3	1	3	0	1	0
ENSG00000206767.1	0	0	0	0	0	0
ENSG00000226662.2	0	0	0	0	0	0
ENSG00000207095.1	0	0	0	0	0	0
ENSG00000009780.14	198	280	221	364	313	337
ENSG00000231344.1	2	2	0	2	0	0
ENSG00000230833.1	0	1	0	2	1	1
ENSG00000117758.12	1027	1361	1300	1375	1225	1096
ENSG00000269971.1	1	0	0	0	0	6
ENSG00000276889.1	0	0	0	1	0	0
ENSG00000270031.1	0	1	0	0	2	2
ENSG00000223062.1	0	0	0	0	0	0
ENSG00000117751.16	756	965	823	1170	1085	834
ENSG00000252947.1	2	4	2	4	6	7
ENSG00000278868.1	0	0	0	0	0	0
ENSG00000130775.14	9	18	18	9	12	8
ENSG00000117748.8	232	219	193	357	280	275
ENSG00000130768.13	106	132	119	84	95	101
ENSG00000227050.1	0	3	0	0	0	2
ENSG00000158156.7	252	256	244	193	187	159
ENSG00000158161.14	995	1191	1153	1389	1312	1088
ENSG00000238231.2	0	1	1	1	2	3
ENSG00000281570.1	0	0	0	2	0	0
ENSG00000240750.3	1	0	1	1	2	4
ENSG00000280526.1	0	0	0	0	0	0
ENSG00000228589.3	50	71	75	95	71	53
ENSG00000228943.1	0	0	0	0	0	0
ENSG00000214812.3	0	1	1	0	0	0
ENSG00000253005.1	0	0	0	0	0	0
ENSG00000169403.10	22	28	38	29	26	10
ENSG00000126698.9	1379	1780	1584	2150	2120	1707
ENSG00000130770.16	1472	1617	1463	1537	1479	1287
ENSG00000270605.1	6	3	3	5	9	3
ENSG00000271398.1	0	0	0	0	0	0
ENSG00000130766.4	1981	2351	2135	1203	1402	1030
ENSG00000130772.12	236	285	241	235	277	215
ENSG00000204138.11	1789	2059	1980	1890	1976	1634
ENSG00000206779.1	2	2	4	0	1	1
ENSG00000229820.2	4	3	4	0	1	2
ENSG00000221216.1	3	1	1	3	4	0
ENSG00000180198.14	355	358	420	636	533	469
ENSG00000242125.3	360	455	403	1008	654	829
ENSG00000274266.1	0	0	0	0	0	0
ENSG00000200087.1	114	106	83	129	88	72
ENSG00000231468.2	5	2	0	11	5	6
ENSG00000279443.1	23	19	14	20	18	28
ENSG00000180098.8	175	191	167	291	239	268
ENSG00000197989.12	33	28	41	89	43	103
ENSG00000221539.1	0	1	2	2	1	7
ENSG00000278274.1	0	0	0	0	0	0
ENSG00000273544.1	0	0	0	0	0	0
ENSG00000274582.1	0	0	0	0	0	0
ENSG00000280498.1	0	0	0	0	0	0
ENSG00000120656.10	281	343	368	359	356	304
ENSG00000188060.6	20	13	36	19	26	12
ENSG00000229388.1	5	8	5	1	3	2
ENSG00000274978.1	0	0	0	0	0	0
ENSG00000270103.3	0	0	0	0	0	0
ENSG00000162419.11	522	609	618	503	479	380
ENSG00000252777.1	0	2	0	0	0	0
ENSG00000198492.13	2394	2719	2669	2873	2844	2239
ENSG00000116329.9	2	2	3	6	2	2
ENSG00000233427.1	0	0	0	0	0	0
ENSG00000199756.1	0	0	0	0	0	0
ENSG00000159023.17	659	896	778	925	899	765
ENSG00000225616.2	5	7	2	7	12	3
ENSG00000206704.1	1	0	0	0	0	1
ENSG00000277958.1	1	1	2	2	0	1
ENSG00000253304.1	33	46	53	16	34	21
ENSG00000225750.1	0	1	6	1	1	6
ENSG00000116350.14	890	960	929	1337	1245	1076
ENSG00000277916.1	7	8	6	20	13	22
ENSG00000116353.14	226	248	217	167	165	181
ENSG00000237934.1	4	2	8	1	2	7
ENSG00000060656.18	1039	1094	998	230	289	262
ENSG00000221550.2	0	0	0	0	0	0
ENSG00000230523.1	2	0	1	1	1	0
ENSG00000266678.1	0	0	0	0	0	0
ENSG00000225011.4	0	0	0	0	0	0
ENSG00000221126.1	0	0	0	0	0	0
ENSG00000228176.1	0	0	0	0	0	0
ENSG00000222787.1	0	0	0	0	0	0
ENSG00000270927.1	0	0	0	0	0	0
ENSG00000233399.2	0	0	0	0	0	0
ENSG00000233372.1	0	0	0	0	0	0
ENSG00000231251.1	0	0	0	0	0	0
ENSG00000236335.1	0	0	0	0	0	0
ENSG00000231949.1	0	0	0	0	0	0
ENSG00000162510.5	6	3	1	0	0	0
ENSG00000186056.8	9	11	7	8	5	14
ENSG00000162511.7	161	171	266	139	105	78
ENSG00000264773.1	0	0	0	0	0	1
ENSG00000280823.1	0	0	0	0	0	0
ENSG00000229607.1	0	0	0	0	0	0
ENSG00000223382.3	2	16	10	14	8	17
ENSG00000222784.1	0	0	0	0	0	0
ENSG00000235143.1	0	1	0	0	0	0
ENSG00000162512.14	2991	3166	3215	1750	1917	1409
ENSG00000266210.2	0	0	0	0	0	0
ENSG00000134644.14	4768	5448	5099	5088	5100	4141
ENSG00000237329.2	6	5	6	8	8	8
ENSG00000232768.1	0	1	0	4	4	2
ENSG00000215900.4	0	0	0	0	0	0
ENSG00000225142.2	0	0	0	0	0	0
ENSG00000084628.8	12	13	8	9	21	10
ENSG00000060688.11	528	689	620	841	769	657
ENSG00000229447.2	4	5	4	6	8	4
ENSG00000121766.13	268	307	327	331	363	257
ENSG00000229044.1	5	1	3	1	2	2
ENSG00000121769.6	6506	9397	7790	6161	5091	7618
ENSG00000168528.10	337	308	309	53	73	46
ENSG00000279468.1	0	0	0	0	0	0
ENSG00000215899.3	0	0	0	0	0	0
ENSG00000206981.1	0	0	0	0	0	0
ENSG00000260386.4	0	0	0	0	0	0
ENSG00000265961.1	0	0	0	0	0	0
ENSG00000223907.1	0	0	0	0	0	0
ENSG00000260636.1	0	0	0	0	0	0
ENSG00000229167.1	0	0	1	1	0	0
ENSG00000142910.14	1367	1396	1361	153	121	177
ENSG00000121764.10	7	11	7	11	3	4
ENSG00000162517.11	1021	1187	1028	1303	1214	1047
ENSG00000235790.6	9	6	3	14	10	20
ENSG00000264078.1	0	1	1	0	0	0
ENSG00000084636.16	808	776	816	556	456	421
ENSG00000121753.11	2686	3083	2489	4662	4738	3086
ENSG00000266580.1	0	1	0	0	0	1
ENSG00000254545.1	0	0	0	0	0	0
ENSG00000134668.11	26	28	32	11	10	6
ENSG00000203620.2	1	0	0	0	0	0
ENSG00000269967.1	0	1	3	4	2	3
ENSG00000184007.16	3963	4706	4656	4645	4274	3469
ENSG00000281319.1	0	1	0	0	0	0
ENSG00000228634.1	7	9	11	7	3	12
ENSG00000121774.16	2907	3312	3114	4702	4674	3638
ENSG00000203325.3	3	16	8	10	11	18
ENSG00000121775.16	246	294	313	411	387	287
ENSG00000266203.1	2	0	2	1	0	2
ENSG00000276493.1	0	1	0	0	0	0
ENSG00000025800.12	5827	6710	6238	5374	5458	4726
ENSG00000250135.1	0	0	0	0	0	0
ENSG00000084652.14	2228	2374	2461	2146	1898	1780
ENSG00000160050.13	143	143	128	169	175	197
ENSG00000224066.1	1	0	1	1	3	5
ENSG00000160051.10	53	48	54	76	67	83
ENSG00000222046.2	11	15	8	19	17	31
ENSG00000160055.18	141	178	164	233	188	197
ENSG00000084623.10	2352	2906	2628	3272	3470	3120
ENSG00000220785.6	41	47	44	27	17	36
ENSG00000183615.5	13	19	18	3	5	6
ENSG00000182866.15	0	0	0	0	0	0
ENSG00000277617.1	0	0	0	0	0	0
ENSG00000252450.1	0	0	0	0	0	0
ENSG00000116478.10	700	791	781	1402	1246	1215
ENSG00000175130.6	2910	2996	3267	3869	4145	3083
ENSG00000233775.1	0	0	0	1	1	0
ENSG00000162526.6	10	18	15	17	21	10
ENSG00000225828.1	13	28	29	21	16	14
ENSG00000160058.17	1180	1281	1193	715	686	629
ENSG00000224333.1	0	0	0	0	0	0
ENSG00000270850.1	0	0	0	0	0	0
ENSG00000229259.1	0	0	0	0	0	1
ENSG00000263529.2	0	0	0	0	0	0
ENSG00000254553.1	0	0	1	0	0	0
ENSG00000273274.1	221	221	231	147	109	118
ENSG00000160062.13	370	434	491	216	245	170
ENSG00000176261.14	169	206	178	215	176	173
ENSG00000200591.1	2	3	5	5	1	5
ENSG00000162521.17	3440	4068	3939	5391	5037	4392
ENSG00000162520.13	79	91	79	62	75	48
ENSG00000224409.1	0	0	0	0	0	0
ENSG00000162522.9	1449	1416	1506	758	848	684
ENSG00000134684.9	3833	4451	4122	2563	2614	2532
ENSG00000116497.16	748	1016	906	990	884	998
ENSG00000160097.14	428	504	440	366	468	287
ENSG00000121905.8	0	10	2	10	1	3
ENSG00000121900.17	188	161	190	85	121	62
ENSG00000116514.15	540	615	493	382	408	340
ENSG00000278966.1	1	1	2	0	0	1
ENSG00000217644.5	4	4	2	0	3	4
ENSG00000239670.1	2	4	2	4	1	0
ENSG00000236065.2	18	14	8	11	16	17
ENSG00000004455.15	1829	2136	2080	2179	2021	2092
ENSG00000276645.1	4	2	5	7	2	7
ENSG00000142920.15	51	64	53	28	45	50
ENSG00000278997.1	2	3	8	2	3	1
ENSG00000116525.12	128	105	118	76	98	94
ENSG00000279179.1	4	2	5	10	0	1
ENSG00000160094.13	1481	1521	1459	1423	1617	1124
ENSG00000270115.1	5	6	8	13	6	16
ENSG00000184389.9	1	2	3	7	0	0
ENSG00000225313.4	46	59	41	81	51	61
ENSG00000134686.15	1831	2000	1906	1710	1645	1377
ENSG00000266239.2	0	2	1	0	2	2
ENSG00000222112.1	8	9	5	6	5	6
ENSG00000233246.1	0	1	0	1	1	1
ENSG00000221225.1	0	0	0	0	0	0
ENSG00000234512.1	0	0	0	0	0	0
ENSG00000121903.13	155	165	163	140	150	112
ENSG00000235907.2	1	4	3	1	2	2
ENSG00000121904.16	30	19	28	13	12	10
ENSG00000280715.1	0	0	0	0	0	0
ENSG00000227000.2	1	0	0	0	0	0
ENSG00000176256.9	0	0	0	0	0	3
ENSG00000231163.4	1	0	0	0	0	0
ENSG00000201148.1	0	0	0	0	0	0
ENSG00000142698.13	0	0	0	0	0	0
ENSG00000221053.1	0	0	0	0	0	0
ENSG00000270241.1	0	0	0	0	0	0
ENSG00000207941.1	0	0	0	0	0	0
ENSG00000163866.8	542	635	577	708	670	603
ENSG00000189280.3	2	0	4	0	1	0
ENSG00000189433.5	0	0	0	0	1	0
ENSG00000255811.1	0	0	0	0	0	1
ENSG00000216162.1	0	0	2	1	0	1
ENSG00000188910.7	5	1	1	3	1	0
ENSG00000187513.8	39	33	71	82	73	77
ENSG00000230163.1	36	48	27	36	18	26
ENSG00000116544.10	12	14	9	7	5	2
ENSG00000241014.1	33	63	62	15	19	22
ENSG00000271741.1	0	0	0	0	0	0
ENSG00000243749.1	2	1	0	0	0	0
ENSG00000163867.15	284	355	348	443	357	395
ENSG00000233940.1	0	0	0	0	0	0
ENSG00000197056.8	434	543	586	594	543	448
ENSG00000228348.1	3	0	4	2	4	1
ENSG00000116560.9	3551	3979	3686	6631	5708	5275
ENSG00000201868.1	0	0	0	0	0	0
ENSG00000146463.10	3444	3939	3850	4671	4938	3895
ENSG00000240374.3	1	2	1	1	3	1
ENSG00000201542.1	0	2	0	1	0	1
ENSG00000229994.1	14	18	21	38	45	36
ENSG00000227409.1	1	5	1	1	0	0
ENSG00000278702.1	0	0	0	0	0	0
ENSG00000142687.16	2756	3266	3011	3017	2997	2659
ENSG00000236274.1	11	6	3	5	10	4
ENSG00000020129.14	1457	1655	1443	1215	1229	1098
ENSG00000239636.1	2	3	5	12	3	1
ENSG00000116819.6	9	8	10	7	7	15
ENSG00000126067.10	2409	2559	2498	2721	2584	2220
ENSG00000142686.7	348	375	310	190	187	194
ENSG00000092853.12	66	48	51	646	537	615
ENSG00000232335.1	0	0	0	0	0	1
ENSG00000134698.10	1535	1795	1662	1476	1394	1222
ENSG00000092847.9	2247	2532	2481	1762	1871	1500
ENSG00000271164.1	0	1	0	0	0	0
ENSG00000280133.1	0	0	0	0	0	0
ENSG00000271914.1	8	2	8	3	3	2
ENSG00000126070.17	1709	1862	1896	1941	1852	1699
ENSG00000271554.1	2	6	2	6	9	6
ENSG00000232862.4	2	3	3	1	0	1
ENSG00000092850.10	8	5	7	6	7	4
ENSG00000116863.10	415	442	333	369	352	304
ENSG00000171812.9	18	17	16	8	6	9
ENSG00000054116.10	634	750	696	632	607	503
ENSG00000116871.14	3945	4127	3746	3018	3085	2479
ENSG00000264592.2	0	0	0	0	0	0
ENSG00000054118.12	4233	4528	4239	4441	4452	3724
ENSG00000231849.1	1	3	6	3	6	2
ENSG00000278491.1	0	0	0	4	1	0
ENSG00000214193.8	92	90	82	111	83	171
ENSG00000142694.6	192	175	165	110	119	94
ENSG00000116883.8	24	28	24	26	18	48
ENSG00000196182.9	1664	1862	1825	1586	1570	1236
ENSG00000181817.5	240	232	229	244	219	220
ENSG00000222821.1	0	2	1	0	2	0
ENSG00000116885.17	110	126	97	239	237	170
ENSG00000201448.1	1	0	2	1	3	0
ENSG00000116898.10	525	629	489	733	694	704
ENSG00000119535.16	18	11	9	90	26	13
ENSG00000230214.1	0	0	0	0	0	0
ENSG00000281218.1	0	0	0	0	0	0
ENSG00000234481.1	0	0	0	0	0	0
ENSG00000163873.8	3	17	0	4	5	1
ENSG00000280570.1	0	0	0	0	0	0
ENSG00000264698.1	0	0	0	0	0	0
ENSG00000207328.1	0	0	0	0	0	0
ENSG00000223944.1	0	0	0	0	0	0
ENSG00000252368.1	0	0	0	0	0	0
ENSG00000230451.2	0	0	0	0	0	0
ENSG00000233621.1	9	12	16	2	6	1
ENSG00000163874.8	85	81	85	52	52	65
ENSG00000278228.1	0	0	0	0	0	0
ENSG00000163875.14	833	1024	952	1011	935	854
ENSG00000263675.1	2	3	2	4	0	6
ENSG00000163877.9	360	381	444	465	404	347
ENSG00000232273.1	1	2	2	1	3	5
ENSG00000237749.4	0	0	1	0	0	0
ENSG00000163879.10	127	154	128	210	216	149
ENSG00000134697.11	958	1143	1045	926	857	839
ENSG00000169218.12	50	35	37	1	0	2
ENSG00000116922.13	231	314	310	334	267	293
ENSG00000134690.9	54	30	40	601	498	409
ENSG00000183317.15	7	3	4	1	2	2
ENSG00000200421.1	0	0	0	0	0	0
ENSG00000214141.4	0	0	0	0	0	0
ENSG00000227416.2	0	0	1	0	0	0
ENSG00000185090.13	59	68	64	36	59	54
ENSG00000233728.1	0	0	0	0	0	0
ENSG00000196449.3	180	166	186	140	119	116
ENSG00000197982.13	772	848	782	773	824	728
ENSG00000188786.9	825	900	817	774	778	632
ENSG00000235673.1	2	1	1	0	4	0
ENSG00000230955.1	0	0	0	0	0	0
ENSG00000204084.11	332	388	405	457	359	398
ENSG00000252448.1	0	0	0	1	3	0
ENSG00000222282.1	2	3	5	1	5	2
ENSG00000277168.1	0	0	0	0	0	0
ENSG00000183431.10	1051	1251	1161	1239	1259	1124
ENSG00000212541.1	10	10	7	9	5	3
ENSG00000183386.8	425	417	512	257	256	243
ENSG00000183520.10	656	777	783	983	891	750
ENSG00000185668.6	5	6	7	2	2	2
ENSG00000224592.4	4	5	4	0	0	0
ENSG00000223589.2	5	1	1	0	0	0
ENSG00000265596.1	0	0	0	0	0	0
ENSG00000237290.1	1	0	0	0	0	0
ENSG00000275350.1	0	0	0	0	0	0
ENSG00000200796.1	0	0	0	0	0	0
ENSG00000238063.1	0	0	0	0	0	0
ENSG00000215895.4	6	5	2	1	5	0
ENSG00000116954.7	531	608	684	528	519	461
ENSG00000273637.1	0	0	0	0	0	0
ENSG00000228436.2	19	12	18	20	25	12
ENSG00000214114.7	230	280	276	352	298	301
ENSG00000274944.3	0	1	0	2	0	0
ENSG00000131233.9	2	1	2	3	2	1
ENSG00000158315.9	6	11	9	10	9	16
ENSG00000199963.1	0	0	0	0	0	0
ENSG00000207466.1	0	0	0	0	0	0
ENSG00000235549.1	0	0	0	0	0	0
ENSG00000174574.14	2747	3485	2873	3380	3034	2764
ENSG00000168653.9	492	627	527	644	619	610
ENSG00000127603.22	24130	25762	24349	15785	14130	14464
ENSG00000206654.1	0	4	1	2	0	1
ENSG00000222378.1	1	2	0	2	2	0
ENSG00000270040.1	1	2	8	6	4	9
ENSG00000226438.1	1	2	3	2	5	6
ENSG00000217897.2	3	2	3	5	7	5
ENSG00000183682.7	2	5	2	0	1	2
ENSG00000237624.1	0	2	4	0	1	1
ENSG00000182109.6	14	10	9	11	3	7
ENSG00000243970.1	2	2	0	0	0	1
ENSG00000090621.12	2946	3185	3140	3001	2658	2563
ENSG00000228060.1	5	7	2	9	3	14
ENSG00000201457.1	7	3	3	5	2	1
ENSG00000163909.7	469	396	469	50	44	55
ENSG00000225903.1	2	0	0	0	0	0
ENSG00000116981.3	8	6	9	4	9	7
ENSG00000116983.11	52	64	62	17	8	13
ENSG00000084072.15	390	430	393	471	458	445
ENSG00000225333.6	1	0	0	0	1	0
ENSG00000252413.1	0	0	0	0	0	0
ENSG00000116985.9	19	18	13	15	8	10
ENSG00000198754.5	0	1	0	0	0	0
ENSG00000261798.1	3	1	0	0	0	0
ENSG00000229213.1	0	0	0	0	0	0
ENSG00000043514.14	245	317	239	357	355	325
ENSG00000202222.1	5	1	1	4	5	1
ENSG00000116990.10	27	28	26	15	1	13
ENSG00000236546.1	0	2	2	0	0	2
ENSG00000207356.1	0	0	0	0	0	0
ENSG00000168389.16	36	43	30	22	25	26
ENSG00000228477.1	0	0	1	0	0	0
ENSG00000131236.15	3616	3685	4025	1786	1711	1473
ENSG00000131238.15	1229	1525	1501	1308	1346	1196
ENSG00000226745.2	0	0	0	0	0	0
ENSG00000117000.8	1820	2020	2087	2921	2932	2454
ENSG00000207508.1	1	3	2	0	1	2
ENSG00000188800.5	1	2	0	0	0	0
ENSG00000259943.1	48	58	72	91	109	76
ENSG00000084073.7	1234	1349	1444	1020	1040	842
ENSG00000231296.1	3	1	5	5	5	6
ENSG00000049089.12	24	18	17	8	14	5
ENSG00000227311.3	0	0	0	0	0	0
ENSG00000084070.10	460	576	535	770	731	696
ENSG00000213172.3	0	0	0	0	0	0
ENSG00000187801.13	66	80	71	36	41	48
ENSG00000260920.2	109	128	133	66	78	60
ENSG00000279667.1	1	1	8	2	2	3
ENSG00000187815.8	75	60	73	45	39	68
ENSG00000238287.1	4	3	3	4	6	13
ENSG00000164002.10	115	189	160	146	126	131
ENSG00000227278.1	0	0	3	1	0	0
ENSG00000238186.1	7	5	2	4	4	3
ENSG00000117010.14	52	61	73	65	54	82
ENSG00000236505.1	0	1	0	0	0	0
ENSG00000233910.1	0	0	0	0	0	0
ENSG00000117016.8	589	646	640	659	615	558
ENSG00000237899.1	1	5	0	4	6	0
ENSG00000272145.1	11	22	17	26	21	20
ENSG00000066136.18	1536	1937	1715	2352	2247	1934
ENSG00000198974.2	3	6	3	5	5	4
ENSG00000207962.1	4	2	0	2	1	1
ENSG00000117013.13	39	36	41	25	16	21
ENSG00000264582.2	0	1	0	0	0	0
ENSG00000179862.6	155	156	134	99	73	95
ENSG00000229528.1	0	0	0	0	0	0
ENSG00000228940.1	0	0	0	0	0	0
ENSG00000273910.1	0	0	0	0	0	0
ENSG00000233118.2	0	0	0	0	0	0
ENSG00000171793.12	507	621	622	537	471	564
ENSG00000281712.1	0	0	0	0	0	0
ENSG00000281207.1	37	25	45	33	43	53
ENSG00000171790.14	22	13	17	37	20	16
ENSG00000010803.15	1852	2314	2061	3200	3005	2439
ENSG00000215893.3	2	11	2	7	8	3
ENSG00000235358.1	16	13	7	17	13	18
ENSG00000213987.4	1	1	1	4	2	1
ENSG00000281479.1	0	1	0	1	2	0
ENSG00000204060.5	177	143	125	115	111	101
ENSG00000229901.1	4	0	1	4	3	6
ENSG00000252563.1	0	0	0	0	0	0
ENSG00000127129.8	8	5	7	7	9	8
ENSG00000127124.12	701	719	722	355	382	311
ENSG00000230881.1	1	1	0	0	0	0
ENSG00000230638.4	4	5	2	1	2	2
ENSG00000264896.1	0	0	0	0	0	0
ENSG00000227538.1	1	0	0	0	0	0
ENSG00000228776.2	0	0	0	0	0	0
ENSG00000044012.3	0	0	0	0	0	0
ENSG00000197273.3	0	0	1	0	0	0
ENSG00000198815.7	2302	2707	2544	2721	2728	2152
ENSG00000227527.2	2	3	12	5	3	2
ENSG00000177181.13	842	1113	894	1499	1306	1327
ENSG00000235002.1	1	1	0	2	0	1
ENSG00000066185.11	19	18	8	12	9	9
ENSG00000127125.8	465	531	526	486	471	491
ENSG00000186409.13	40	46	45	108	77	108
ENSG00000230116.1	1	1	0	0	0	0
ENSG00000236876.3	0	0	0	1	0	0
ENSG00000200254.1	0	0	0	4	1	1
ENSG00000236180.2	0	0	0	4	0	1
ENSG00000171960.9	165	198	184	225	251	202
ENSG00000234917.2	1	2	3	6	6	4
ENSG00000065978.16	7535	8457	7624	9473	8512	8270
ENSG00000164007.9	0	0	0	0	0	0
ENSG00000117385.14	1603	1574	1814	609	568	577
ENSG00000164008.12	198	211	227	309	260	232
ENSG00000228452.1	31	40	43	26	58	25
ENSG00000274386.3	6	2	7	1	1	4
ENSG00000177868.10	82	83	68	172	160	122
ENSG00000164010.12	187	186	171	215	156	185
ENSG00000228192.6	14	7	15	5	11	11
ENSG00000164011.16	168	194	119	175	189	137
ENSG00000233708.1	0	0	0	0	0	0
ENSG00000237090.1	0	0	0	0	0	0
ENSG00000225099.1	0	0	0	0	0	2
ENSG00000117394.18	1231	1194	1216	3396	3023	3202
ENSG00000227533.4	19	18	25	55	45	43
ENSG00000207256.1	0	0	2	0	0	0
ENSG00000277513.1	0	0	0	0	0	0
ENSG00000186973.9	2	1	2	2	1	2
ENSG00000117395.9	358	471	402	356	368	341
ENSG00000243710.6	12	12	8	4	2	5
ENSG00000199240.1	0	0	0	0	0	0
ENSG00000179178.9	13	15	13	0	1	8
ENSG00000253313.4	0	0	1	0	0	0
ENSG00000066056.12	74	70	68	61	28	52
ENSG00000117400.13	11	11	2	9	1	8
ENSG00000234694.1	4	3	1	4	2	1
ENSG00000117399.12	74	59	75	768	619	526
ENSG00000066322.11	721	721	752	621	562	499
ENSG00000277622.1	0	0	0	0	0	0
ENSG00000159479.15	258	272	279	261	276	211
ENSG00000229431.1	1	4	4	3	2	4
ENSG00000198198.12	1414	1560	1471	1285	1266	1224
ENSG00000229372.1	0	0	0	0	0	0
ENSG00000274975.1	0	0	0	0	0	0
ENSG00000178922.15	97	73	77	63	63	61
ENSG00000229348.1	3	3	3	1	1	1
ENSG00000142949.15	6824	6459	7099	1267	1440	1274
ENSG00000066135.11	1296	1372	1384	1230	1288	991
ENSG00000236200.4	13	19	20	27	19	33
ENSG00000126091.18	268	294	302	489	474	447
ENSG00000229444.1	4	5	6	3	2	5
ENSG00000233674.2	3	2	1	3	3	7
ENSG00000224751.2	1	5	2	1	0	7
ENSG00000117407.15	2	1	2	3	0	4
ENSG00000237950.1	2	2	0	2	2	0
ENSG00000117408.9	980	966	934	944	914	828
ENSG00000132768.12	370	435	366	314	295	283
ENSG00000117410.12	656	794	651	641	612	589
ENSG00000117411.15	1432	1451	1383	1096	1112	967
ENSG00000159214.11	66	73	48	45	57	53
ENSG00000196517.10	452	471	573	115	144	105
ENSG00000230615.5	29	26	32	7	10	7
ENSG00000227163.2	2	0	1	0	0	2
ENSG00000271647.1	0	0	0	0	0	0
ENSG00000281534.1	0	0	0	0	0	0
ENSG00000239560.3	0	0	0	0	0	0
ENSG00000171872.4	0	0	1	1	0	0
ENSG00000233514.1	0	0	0	0	2	0
ENSG00000239275.1	0	0	0	0	0	0
ENSG00000226804.4	0	0	0	0	0	0
ENSG00000200171.1	0	0	0	0	0	0
ENSG00000238037.1	0	0	0	0	0	0
ENSG00000227994.1	0	0	0	0	0	0
ENSG00000271329.1	0	0	0	0	0	0
ENSG00000178028.12	361	409	357	434	455	403
ENSG00000117419.13	845	904	885	829	827	674
ENSG00000233602.1	2	5	4	6	12	8
ENSG00000252146.1	3	1	5	2	1	0
ENSG00000199385.1	0	0	0	0	0	0
ENSG00000187147.16	492	517	528	389	400	363
ENSG00000263381.1	0	0	0	0	0	0
ENSG00000126106.12	66	87	78	142	149	139
ENSG00000198520.9	7	11	17	18	11	5
ENSG00000199377.1	5	6	10	4	0	2
ENSG00000200169.1	3	7	4	3	2	6
ENSG00000142945.11	53	36	37	708	544	533
ENSG00000225721.4	1	4	0	4	2	5
ENSG00000142937.10	8434	9547	9035	20426	20549	16916
ENSG00000264294.1	0	0	0	0	0	0
ENSG00000200913.1	14	13	21	41	41	36
ENSG00000202031.1	0	0	0	0	0	0
ENSG00000281859.1	0	0	0	0	0	0
ENSG00000207421.1	0	0	0	0	0	0
ENSG00000234093.3	7	1	6	9	4	6
ENSG00000142959.4	4	2	2	8	3	3
ENSG00000173846.11	312	321	314	62	92	69
ENSG00000188396.3	3	2	3	0	0	3
ENSG00000222009.7	103	93	98	24	24	22
ENSG00000117425.12	21	14	22	73	63	58
ENSG00000202444.1	0	0	0	0	0	0
ENSG00000226499.1	1	1	3	5	5	1
ENSG00000070785.15	232	335	306	369	338	365
ENSG00000266294.1	0	0	1	0	0	0
ENSG00000253039.1	0	0	3	0	0	0
ENSG00000229815.1	2	2	0	6	2	0
ENSG00000232369.1	0	0	0	0	0	0
ENSG00000268949.1	2	0	2	0	3	0
ENSG00000126107.13	679	680	659	761	798	690
ENSG00000126088.11	966	1171	1020	1486	1482	1387
ENSG00000162415.6	203	173	168	306	320	233
ENSG00000234315.1	0	0	0	0	1	1
ENSG00000221707.2	0	0	0	0	0	0
ENSG00000281912.1	2	6	1	4	2	2
ENSG00000186603.5	13	18	14	6	9	5
ENSG00000132781.16	49	44	50	66	44	64
ENSG00000132773.10	112	133	95	206	169	156
ENSG00000070759.15	59	59	54	106	71	71
ENSG00000236872.1	0	0	0	0	0	0
ENSG00000280670.1	8	11	13	28	18	24
ENSG00000132763.13	411	407	389	515	462	444
ENSG00000117450.12	2628	3051	2826	3028	3189	2695
ENSG00000234379.1	0	0	0	0	0	0
ENSG00000117448.12	628	764	643	641	653	658
ENSG00000281133.1	0	0	0	0	0	0
ENSG00000280836.1	1	0	1	4	7	1
ENSG00000132780.15	496	581	531	1582	1385	1481
ENSG00000281112.1	0	0	1	1	2	2
ENSG00000281825.1	1	1	1	0	1	2
ENSG00000159588.13	28	15	32	32	23	33
ENSG00000159592.9	2508	3060	2819	3456	3291	2786
ENSG00000225447.1	6	2	14	11	11	12
ENSG00000234329.1	6	23	13	13	15	8
ENSG00000159596.6	747	981	956	1312	1213	1109
ENSG00000197429.9	369	413	441	230	253	250
ENSG00000230896.1	69	66	77	35	49	41
ENSG00000236111.5	0	0	0	0	0	0
ENSG00000086015.19	2333	2696	2377	5237	4677	4539
ENSG00000232467.2	1	5	0	6	6	6
ENSG00000117461.13	560	582	607	1051	1225	824
ENSG00000278139.1	0	0	0	0	0	0
ENSG00000226957.1	0	6	0	4	5	1
ENSG00000233114.2	3	0	1	0	0	0
ENSG00000227857.2	0	1	1	1	1	2
ENSG00000117472.8	4	7	7	6	7	6
ENSG00000250719.1	0	0	0	0	0	0
ENSG00000281129.1	1	0	0	0	0	1
ENSG00000085998.12	1252	1432	1235	1397	1267	1335
ENSG00000171357.5	36	72	54	49	60	67
ENSG00000085999.10	48	50	37	230	185	187
ENSG00000132128.15	3247	3633	3518	2914	3206	2596
ENSG00000173660.10	1194	1473	1213	2002	1746	1978
ENSG00000117481.9	570	725	714	739	690	597
ENSG00000225779.1	1	9	0	1	2	1
ENSG00000117480.14	139	180	157	122	102	111
ENSG00000232022.5	0	1	1	0	0	0
ENSG00000273854.1	0	0	0	0	0	0
ENSG00000224863.1	0	0	0	0	0	0
ENSG00000225667.1	0	0	0	0	1	0
ENSG00000197587.9	0	0	0	0	1	0
ENSG00000269956.1	0	0	6	2	8	5
ENSG00000162456.8	0	0	0	0	0	0
ENSG00000079277.18	289	331	287	416	358	369
ENSG00000142961.13	153	173	179	182	150	136
ENSG00000123472.11	1095	1359	1225	1696	1477	1452
ENSG00000233647.2	1	3	0	1	0	3
ENSG00000186118.8	4	3	0	5	1	3
ENSG00000228237.4	1	6	2	4	4	9
ENSG00000159658.9	3175	3627	3669	3713	3656	3058
ENSG00000236476.2	0	0	0	0	0	0
ENSG00000142973.11	0	0	1	0	0	0
ENSG00000154198.13	0	0	0	0	0	0
ENSG00000238145.2	0	0	0	0	0	0
ENSG00000187048.11	0	0	0	0	0	0
ENSG00000259832.1	0	0	0	0	0	0
ENSG00000261196.1	0	0	0	0	0	0
ENSG00000261593.1	0	0	0	0	0	0
ENSG00000261290.1	0	0	0	0	0	0
ENSG00000186377.7	26	30	28	6	6	3
ENSG00000186160.4	0	1	0	0	1	0
ENSG00000225154.2	0	0	0	0	0	0
ENSG00000225506.2	2	0	5	0	1	0
ENSG00000162365.10	0	8	0	0	1	1
ENSG00000225514.1	0	2	0	0	0	0
ENSG00000224805.2	0	3	2	0	0	1
ENSG00000162366.6	1	3	1	0	1	0
ENSG00000162367.10	38	40	26	13	7	15
ENSG00000226252.1	0	2	2	0	0	1
ENSG00000123473.14	156	125	134	537	492	415
ENSG00000162368.12	2238	2936	2840	2506	2180	2039
ENSG00000225762.1	2	8	4	0	6	9
ENSG00000186790.5	4	4	1	3	2	0
ENSG00000237424.1	0	2	6	4	0	0
ENSG00000186564.5	0	3	2	1	1	0
ENSG00000271355.1	0	0	0	0	0	1
ENSG00000229554.2	0	0	0	0	0	0
ENSG00000221346.1	0	0	0	0	0	0
ENSG00000227883.1	0	0	0	0	0	0
ENSG00000221447.1	0	0	0	0	0	0
ENSG00000227947.1	0	0	0	0	0	0
ENSG00000269113.3	117	131	123	105	106	102
ENSG00000223814.1	0	0	0	0	0	0
ENSG00000225028.1	1	1	1	0	0	0
ENSG00000226133.4	0	1	7	1	1	0
ENSG00000231413.1	0	0	0	0	0	0
ENSG00000237180.1	0	1	0	1	0	2
ENSG00000242267.5	1	3	1	0	0	0
ENSG00000279096.1	0	0	0	0	0	1
ENSG00000223720.1	0	0	0	0	0	0
ENSG00000117834.11	3	5	5	5	9	5
ENSG00000272491.1	0	0	0	1	2	0
ENSG00000279214.1	0	2	0	0	2	1
ENSG00000132122.10	203	250	240	340	298	229
ENSG00000224986.2	4	2	1	6	2	0
ENSG00000206700.1	0	0	0	1	1	0
ENSG00000235105.1	11	10	11	8	12	6
ENSG00000223175.1	2	1	2	0	1	1
ENSG00000232514.1	0	0	0	0	0	0
ENSG00000186094.15	3	3	0	6	2	3
ENSG00000162373.11	16	17	22	33	32	27
ENSG00000229846.1	0	0	0	0	0	0
ENSG00000230114.1	0	0	0	0	0	0
ENSG00000225623.1	0	0	0	0	0	0
ENSG00000237478.2	0	0	0	0	1	0
ENSG00000215887.5	0	0	0	0	0	0
ENSG00000221746.1	0	0	0	0	0	0
ENSG00000279324.1	0	1	0	0	0	0
ENSG00000233595.2	0	0	0	0	0	0
ENSG00000162374.15	8	21	4	6	3	4
ENSG00000230828.1	0	0	0	0	0	0
ENSG00000237337.1	0	0	0	0	0	0
ENSG00000233407.1	0	0	0	0	0	0
ENSG00000234080.3	1	1	3	2	1	3
ENSG00000229316.1	0	0	0	0	0	0
ENSG00000225671.2	0	0	0	0	0	0
ENSG00000142700.10	1	0	0	1	1	1
ENSG00000185104.18	1005	1231	1099	1412	1357	1312
ENSG00000225767.1	13	6	12	17	14	3
ENSG00000280887.1	1	0	0	1	0	1
ENSG00000207194.1	0	1	0	2	0	1
ENSG00000230585.2	4	9	6	9	10	9
ENSG00000237130.1	2	1	0	0	2	5
ENSG00000123080.9	23	10	10	383	293	216
ENSG00000265538.1	0	0	0	0	0	0
ENSG00000275816.1	0	0	0	0	0	0
ENSG00000204006.7	0	0	0	0	0	0
ENSG00000200262.1	0	0	0	0	0	0
ENSG00000213478.2	0	0	0	0	2	0
ENSG00000239101.1	0	0	0	0	0	0
ENSG00000203356.2	0	4	5	1	3	2
ENSG00000123091.4	3817	4705	4534	9907	9422	7056
ENSG00000233406.5	7	13	6	9	17	18
ENSG00000236434.2	5	3	4	4	3	0
ENSG00000085831.14	290	315	264	324	276	373
ENSG00000261664.4	2	6	4	6	8	2
ENSG00000085832.15	3725	4551	4534	3655	3385	2919
ENSG00000232027.2	9	5	4	5	6	8
ENSG00000206595.1	1	1	0	1	2	1
ENSG00000238140.1	3	7	4	5	10	9
ENSG00000227070.1	4	7	5	2	4	2
ENSG00000252032.1	3	1	0	0	0	0
ENSG00000227742.1	7	11	7	7	4	8
ENSG00000117859.17	5070	6392	5809	3709	3269	3190
ENSG00000236973.2	0	3	7	0	1	0
ENSG00000232846.1	0	0	2	1	1	0
ENSG00000212624.1	2	3	7	1	1	0
ENSG00000078618.18	2500	3051	2890	2892	2653	2466
ENSG00000266993.3	16	23	27	20	5	12
ENSG00000272175.1	1	1	3	3	3	6
ENSG00000212076.1	0	0	0	0	0	0
ENSG00000230604.2	1	6	5	1	1	0
ENSG00000280742.1	0	0	0	0	0	0
ENSG00000169213.6	1244	1172	1336	110	113	91
ENSG00000200839.1	0	0	0	0	0	0
ENSG00000229032.1	0	0	0	0	0	0
ENSG00000264613.2	0	0	0	0	0	0
ENSG00000117862.10	901	975	938	883	787	738
ENSG00000198841.3	93	102	98	125	109	84
ENSG00000223390.1	3	1	5	1	1	1
ENSG00000228369.2	4	3	2	1	4	1
ENSG00000134717.16	2080	2844	2581	2668	2479	2195
ENSG00000157077.13	825	897	970	782	913	689
ENSG00000241745.3	0	0	0	0	0	0
ENSG00000281172.1	0	0	0	0	0	0
ENSG00000228407.2	4	3	5	5	8	4
ENSG00000223429.1	2	3	1	2	1	1
ENSG00000224255.2	1	0	0	0	0	1
ENSG00000236004.2	2	0	1	1	1	1
ENSG00000237663.2	2	0	2	0	2	2
ENSG00000213735.2	1	4	2	8	1	2
ENSG00000154222.13	596	625	595	604	522	552
ENSG00000272100.1	2	1	3	3	5	5
ENSG00000224680.4	2	1	3	4	7	10
ENSG00000085840.11	29	24	20	196	183	190
ENSG00000134748.12	763	813	758	1237	1275	1033
ENSG00000134744.12	1854	2283	2052	2396	2264	2068
ENSG00000272371.1	2	3	4	2	1	5
ENSG00000236290.1	0	0	1	0	0	0
ENSG00000116157.5	687	692	717	481	545	534
ENSG00000182183.13	1	0	2	1	0	0
ENSG00000162377.5	500	616	618	497	570	500
ENSG00000233664.1	0	0	0	0	0	0
ENSG00000239640.3	0	0	0	0	0	0
ENSG00000162378.11	3685	4204	4001	4159	4096	3678
ENSG00000252018.1	0	0	0	0	0	0
ENSG00000228929.1	9	8	4	12	11	14
ENSG00000206627.1	1	2	3	7	2	4
ENSG00000203995.8	9	7	15	11	7	9
ENSG00000242391.2	0	0	0	0	1	0
ENSG00000121310.15	286	373	334	332	233	309
ENSG00000230953.2	16	30	17	18	13	27
ENSG00000231866.2	3	0	0	0	0	0
ENSG00000116171.15	1407	1876	1655	1976	1758	1611
ENSG00000264834.1	0	0	0	0	0	0
ENSG00000266188.1	0	0	0	0	0	0
ENSG00000265815.1	0	1	0	0	0	0
ENSG00000237279.2	1	0	0	0	0	0
ENSG00000236360.2	2	0	1	2	0	0
ENSG00000226147.1	0	1	0	0	1	2
ENSG00000279054.1	0	0	0	0	1	0
ENSG00000174348.12	653	667	519	142	113	93
ENSG00000232993.1	0	0	0	0	0	0
ENSG00000227644.2	0	0	0	0	0	0
ENSG00000162383.10	16	17	18	2	2	0
ENSG00000235563.1	0	0	0	0	0	0
ENSG00000277397.1	0	0	0	0	0	0
ENSG00000157184.5	327	417	353	315	311	279
ENSG00000236723.2	1	1	7	3	1	3
ENSG00000162384.12	348	345	342	522	548	467
ENSG00000259818.1	2	5	4	3	8	3
ENSG00000162385.9	262	296	255	342	330	290
ENSG00000226754.1	11	18	32	17	16	7
ENSG00000157193.13	103	104	94	124	150	134
ENSG00000234578.1	0	0	0	0	0	0
ENSG00000228838.1	1	0	1	0	3	0
ENSG00000225030.1	0	0	0	0	0	0
ENSG00000232762.1	1	1	0	0	1	1
ENSG00000225675.2	0	0	0	0	0	0
ENSG00000226938.1	0	0	0	0	0	0
ENSG00000230138.1	0	0	0	0	0	0
ENSG00000236253.6	0	0	0	0	0	0
ENSG00000143006.7	0	0	0	0	0	0
ENSG00000174332.4	8	2	6	1	1	0
ENSG00000239007.1	0	0	0	0	0	0
ENSG00000058804.11	492	531	565	1059	950	854
ENSG00000201003.1	0	0	0	0	0	2
ENSG00000229687.2	0	0	0	0	0	0
ENSG00000058799.12	327	385	354	323	305	231
ENSG00000211452.9	4	1	4	5	0	5
ENSG00000081870.10	116	132	128	265	222	186
ENSG00000116212.13	432	469	480	594	551	524
ENSG00000219102.3	0	1	5	5	4	4
ENSG00000203985.9	0	0	0	0	0	0
ENSG00000116209.10	3002	3697	3488	2278	2103	1797
ENSG00000280378.1	4	3	13	8	2	8
ENSG00000116205.9	276	290	375	289	308	246
ENSG00000264208.1	0	0	0	0	0	0
ENSG00000225183.1	0	2	0	0	0	0
ENSG00000279049.1	0	0	0	0	0	0
ENSG00000157211.10	0	1	0	0	0	0
ENSG00000280425.1	0	0	1	0	0	0
ENSG00000256407.1	0	3	0	0	0	1
ENSG00000215883.8	93	109	93	128	107	111
ENSG00000116221.14	983	1107	1024	1414	1340	1266
ENSG00000157216.14	1579	1680	1745	1965	2086	1464
ENSG00000198711.5	14	20	12	21	11	13
ENSG00000225632.1	2	0	2	2	3	1
ENSG00000232245.1	0	0	0	0	0	0
ENSG00000281315.1	0	0	0	0	0	0
ENSG00000265404.1	0	0	0	0	0	0
ENSG00000235741.1	0	0	0	0	0	0
ENSG00000237173.1	0	0	0	0	0	0
ENSG00000227453.1	0	0	0	0	0	0
ENSG00000162390.16	657	707	536	1369	1129	1305
ENSG00000162391.10	29	42	23	57	44	53
ENSG00000230728.1	1	0	0	6	1	2
ENSG00000184313.18	52	34	37	72	42	61
ENSG00000271723.4	3	4	4	9	2	13
ENSG00000243725.5	16	17	26	14	22	11
ENSG00000162396.5	201	246	240	197	178	171
ENSG00000006555.9	1	0	0	0	0	0
ENSG00000237453.1	0	0	0	0	0	0
ENSG00000162398.10	0	0	2	3	0	3
ENSG00000116133.10	1494	1526	1448	6022	5362	5619
ENSG00000242396.1	0	1	0	0	2	0
ENSG00000233203.5	1	0	2	1	1	0
ENSG00000143001.4	0	0	0	0	0	0
ENSG00000233271.1	0	0	0	0	0	0
ENSG00000162399.6	0	0	0	0	0	1
ENSG00000169174.10	1	0	6	5	10	2
ENSG00000162402.11	3371	3555	3486	3574	3464	3184
ENSG00000231090.1	0	0	0	0	0	0
ENSG00000231095.1	2	1	1	0	0	0
ENSG00000265822.1	0	0	0	0	0	0
ENSG00000231900.3	0	0	0	0	0	0
ENSG00000232198.2	0	0	0	0	0	0
ENSG00000199831.1	0	0	0	2	1	0
ENSG00000252162.1	0	0	0	0	0	0
ENSG00000272051.1	0	0	0	0	0	0
ENSG00000234810.1	0	0	0	0	0	0
ENSG00000233147.1	0	0	0	0	0	0
ENSG00000230250.1	0	0	0	0	0	0
ENSG00000227104.3	0	0	0	0	0	0
ENSG00000233079.1	0	0	0	0	0	0
ENSG00000235612.1	0	0	0	1	0	0
ENSG00000229871.1	0	0	0	0	0	0
ENSG00000260971.3	0	0	0	1	1	1
ENSG00000223307.2	0	0	0	0	0	0
ENSG00000223956.1	0	0	0	1	1	0
ENSG00000162407.8	584	620	581	1214	1367	885
ENSG00000236776.1	1	1	1	2	1	1
ENSG00000224980.1	1	0	1	0	0	1
ENSG00000225475.1	0	2	3	1	3	1
ENSG00000162409.9	1995	2847	2340	2264	1911	1988
ENSG00000187889.11	3	17	16	8	3	5
ENSG00000229913.1	0	0	0	0	0	0
ENSG00000157131.10	0	0	0	0	0	0
ENSG00000021852.11	0	0	0	0	0	0
ENSG00000236341.1	0	0	0	0	0	0
ENSG00000221591.1	0	0	0	0	0	0
ENSG00000173406.14	287	315	352	277	326	197
ENSG00000227935.1	0	1	0	1	2	0
ENSG00000236888.1	0	0	0	1	0	0
ENSG00000238773.1	0	0	0	2	0	0
ENSG00000226759.6	3	4	1	13	11	8
ENSG00000229887.3	0	0	1	2	0	0
ENSG00000223416.3	0	0	0	2	1	1
ENSG00000235038.1	1	0	0	4	3	0
ENSG00000230546.1	0	0	0	0	0	0
ENSG00000233216.1	0	0	0	1	0	4
ENSG00000162600.10	352	405	337	263	272	234
ENSG00000270209.1	0	0	0	0	0	0
ENSG00000264128.2	0	0	0	0	0	0
ENSG00000184292.6	5	4	8	2	1	1
ENSG00000185839.3	1	4	8	3	5	1
ENSG00000162601.8	1010	1342	1309	1528	1296	1513
ENSG00000264081.1	0	0	0	0	0	0
ENSG00000177606.6	1923	2065	1852	2958	2578	2688
ENSG00000234807.5	1	1	2	2	3	3
ENSG00000272226.1	4	1	2	0	1	3
ENSG00000231740.1	0	0	0	0	3	0
ENSG00000232453.4	3	2	2	7	4	4
ENSG00000228121.1	0	1	0	1	0	3
ENSG00000230812.4	0	0	1	0	0	0
ENSG00000241042.1	0	0	0	0	0	0
ENSG00000235215.2	0	0	0	0	0	0
ENSG00000237352.2	0	0	0	0	0	0
ENSG00000224609.5	0	0	0	0	0	0
ENSG00000281041.1	0	0	0	0	0	0
ENSG00000270457.1	3	2	1	2	4	6
ENSG00000172456.15	131	164	142	184	185	138
ENSG00000266150.1	0	0	2	0	0	0
ENSG00000226883.1	1	0	0	0	0	5
ENSG00000231816.1	0	1	0	5	1	1
ENSG00000134709.9	366	456	422	532	501	499
ENSG00000134716.8	396	657	488	72	41	73
ENSG00000265535.2	0	0	0	0	0	0
ENSG00000162598.12	1	2	0	0	0	2
ENSG00000229332.2	0	0	0	0	0	0
ENSG00000238242.1	0	0	0	0	0	0
ENSG00000226476.2	0	0	0	0	0	0
ENSG00000231252.1	1	0	0	3	1	0
ENSG00000162599.14	2889	3128	3299	7877	8364	5287
ENSG00000280760.1	0	0	0	0	0	0
ENSG00000237928.4	0	1	2	1	3	5
ENSG00000270742.1	6	6	7	21	21	11
ENSG00000237853.5	6	8	7	18	9	10
ENSG00000264551.1	0	0	0	0	0	0
ENSG00000223920.2	1	0	2	0	0	0
ENSG00000162604.11	393	471	411	500	394	436
ENSG00000271200.1	4	2	3	1	3	4
ENSG00000132849.17	922	1140	1046	1332	1360	1307
ENSG00000200575.1	0	0	0	1	3	5
ENSG00000212360.1	0	0	0	0	0	1
ENSG00000236646.1	0	1	0	0	0	0
ENSG00000242860.3	0	0	0	0	2	0
ENSG00000263908.1	0	0	0	0	0	0
ENSG00000234204.1	0	0	0	0	0	0
ENSG00000234088.1	0	0	0	0	0	0
ENSG00000240563.1	3	1	1	0	0	1
ENSG00000237227.1	0	0	0	0	0	0
ENSG00000200174.1	0	0	0	0	0	0
ENSG00000132854.17	173	163	174	51	56	75
ENSG00000201153.1	1	0	1	0	0	0
ENSG00000162607.11	712	792	729	1421	1278	1169
ENSG00000116641.14	1916	2128	1962	1888	2069	1712
ENSG00000270549.1	2	2	0	1	0	0
ENSG00000132855.4	18	11	13	16	20	18
ENSG00000278967.1	6	7	9	4	11	6
ENSG00000213703.2	1	2	1	1	1	0
ENSG00000235545.1	4	2	5	12	7	17
ENSG00000125703.13	114	147	153	166	182	165
ENSG00000234318.1	0	0	0	0	0	0
ENSG00000237163.1	0	0	0	0	0	0
ENSG00000229537.4	0	0	0	0	0	0
ENSG00000227485.1	0	0	0	0	0	0
ENSG00000229225.1	0	0	0	0	0	0
ENSG00000203605.3	0	0	0	0	0	0
ENSG00000271593.1	0	0	0	0	0	0
ENSG00000252259.1	0	0	0	0	0	0
ENSG00000224209.5	0	0	0	0	0	0
ENSG00000228734.2	0	0	0	0	0	0
ENSG00000223683.1	0	0	0	0	0	0
ENSG00000230798.4	0	0	0	0	0	0
ENSG00000187140.5	0	0	0	0	0	0
ENSG00000275836.1	0	0	0	0	0	0
ENSG00000252784.1	0	0	0	0	0	0
ENSG00000236674.1	0	0	0	0	0	0
ENSG00000088035.14	106	121	135	126	131	111
ENSG00000142856.15	74	65	63	263	181	178
ENSG00000203965.11	72	129	95	323	281	248
ENSG00000264271.2	0	0	0	1	2	0
ENSG00000251720.1	2	0	2	0	2	1
ENSG00000116652.6	4	11	8	17	14	16
ENSG00000276884.1	0	0	0	0	0	0
ENSG00000278287.1	0	0	0	0	0	0
ENSG00000277565.1	0	0	0	0	0	0
ENSG00000275823.1	0	0	0	0	0	0
ENSG00000277689.1	0	0	0	0	0	0
ENSG00000274199.1	0	0	0	0	0	0
ENSG00000079739.14	2095	2299	2308	2995	2620	2524
ENSG00000244256.3	5	1	3	4	6	6
ENSG00000185483.10	7639	8265	7817	7635	7235	6252
ENSG00000177452.7	50	53	57	60	32	53
ENSG00000228056.3	25	25	20	25	27	20
ENSG00000207190.1	0	5	5	10	4	9
ENSG00000200508.1	5	12	10	5	8	5
ENSG00000223949.5	72	82	83	77	66	57
ENSG00000177414.12	1	2	1	0	0	2
ENSG00000238653.1	0	0	0	0	0	0
ENSG00000158966.12	3138	3514	3370	4295	4683	3672
ENSG00000264470.1	0	0	0	0	0	0
ENSG00000162437.13	834	995	928	1856	1784	1671
ENSG00000162434.10	3932	4257	4166	3648	3606	2947
ENSG00000234784.2	3	0	1	1	1	0
ENSG00000233877.2	3	2	4	6	0	1
ENSG00000226891.5	6	9	8	1	0	1
ENSG00000185031.6	1	2	0	0	0	0
ENSG00000272506.1	2	0	0	0	0	0
ENSG00000212257.1	0	1	2	0	0	0
ENSG00000265996.1	2	4	8	2	1	2
ENSG00000199135.1	0	0	0	0	0	0
ENSG00000231485.1	0	1	0	2	0	0
ENSG00000235804.2	0	0	0	0	0	0
ENSG00000234496.2	0	0	0	0	0	0
ENSG00000162433.13	2848	3428	3199	3818	3248	3974
ENSG00000231622.1	0	3	1	4	2	5
ENSG00000116675.14	1510	1665	1489	1612	1636	1431
ENSG00000229294.1	10	10	10	24	15	16
ENSG00000234144.1	3	6	3	7	5	3
ENSG00000222624.1	0	1	0	0	1	0
ENSG00000213625.7	2855	3666	3405	3028	3190	2599
ENSG00000116678.17	320	376	396	282	277	230
ENSG00000237852.1	0	1	0	0	0	0
ENSG00000224570.1	0	4	0	1	0	5
ENSG00000239319.3	0	0	0	0	0	0
ENSG00000184588.16	1004	1313	1247	2344	2507	1597
ENSG00000227466.1	1	0	0	0	0	0
ENSG00000223152.1	0	0	0	0	0	0
ENSG00000118473.20	314	369	317	410	333	431
ENSG00000264720.2	0	5	0	2	2	2
ENSG00000248458.2	12	15	9	14	6	17
ENSG00000221655.2	0	2	1	2	0	0
ENSG00000152760.8	6	3	1	4	5	3
ENSG00000172410.4	0	0	0	0	1	0
ENSG00000152763.15	90	78	86	68	63	55
ENSG00000231080.1	0	0	0	0	0	0
ENSG00000198160.13	1129	1338	1422	1736	1587	1236
ENSG00000116704.7	690	683	744	757	712	593
ENSG00000203963.10	0	1	0	1	1	0
ENSG00000252433.1	0	0	0	0	0	0
ENSG00000275678.1	0	1	0	1	2	2
ENSG00000162594.13	0	0	1	2	0	0
ENSG00000253074.1	0	0	0	0	0	0
ENSG00000221733.1	0	0	0	0	0	0
ENSG00000252116.1	0	0	0	0	0	0
ENSG00000228523.1	0	0	0	1	0	0
ENSG00000081985.9	2	4	5	4	4	2
ENSG00000281152.1	0	0	0	0	0	0
ENSG00000142864.13	7585	9292	8808	13250	12371	10997
ENSG00000223263.1	6	6	11	10	14	22
ENSG00000235200.1	0	0	0	0	0	0
ENSG00000207504.1	0	0	0	0	0	0
ENSG00000238139.2	0	0	0	0	0	0
ENSG00000242482.3	0	0	0	0	0	0
ENSG00000232048.2	0	0	0	0	0	0
ENSG00000116717.10	1219	1517	1335	824	939	815
ENSG00000172380.5	6672	7640	7994	3956	3595	2982
ENSG00000238778.1	7	5	5	3	4	2
ENSG00000232284.6	81	89	82	101	79	75
ENSG00000235055.3	0	0	0	0	0	0
ENSG00000162595.4	528	497	449	1142	1442	814
ENSG00000228431.1	0	0	1	8	7	1
ENSG00000263542.1	0	1	0	1	0	1
ENSG00000116729.12	3907	4545	4461	5350	5003	4225
ENSG00000234383.1	25	20	30	36	22	37
ENSG00000221203.1	0	3	2	6	1	4
ENSG00000229133.1	0	1	0	5	2	3
ENSG00000225242.2	0	0	0	0	0	0
ENSG00000237622.1	0	0	0	0	0	0
ENSG00000229440.1	0	0	0	0	0	0
ENSG00000116745.6	9	14	10	1020	838	710
ENSG00000024526.15	95	81	101	1904	1391	1357
ENSG00000233589.1	1	1	0	6	9	5
ENSG00000234264.1	2	6	0	6	8	6
ENSG00000225167.1	0	0	0	0	0	0
ENSG00000223883.1	2	3	1	4	1	1
ENSG00000235446.1	0	1	0	0	0	0
ENSG00000229639.1	0	0	0	0	0	0
ENSG00000033122.17	447	518	554	281	223	212
ENSG00000270615.1	3	5	5	3	0	1
ENSG00000240692.3	1	0	0	1	2	1
ENSG00000229359.2	0	0	1	0	0	0
ENSG00000237919.4	4	6	3	2	3	4
ENSG00000066557.5	581	792	708	1068	957	929
ENSG00000244389.3	1	0	0	1	0	0
ENSG00000116754.12	2326	2764	2590	3594	3179	3184
ENSG00000228988.1	3	6	10	4	4	6
ENSG00000118454.11	1061	1276	1257	1163	1062	965
ENSG00000197568.12	126	130	104	118	100	81
ENSG00000226088.1	1	1	3	1	4	3
ENSG00000279230.1	0	0	1	0	0	2
ENSG00000116761.10	197	172	169	62	66	66
ENSG00000278636.1	0	1	3	0	0	0
ENSG00000271992.1	3	2	1	4	1	0
ENSG00000233020.1	1	0	0	2	4	0
ENSG00000237033.2	0	0	0	0	0	0
ENSG00000229051.1	0	0	0	0	0	0
ENSG00000226208.1	0	0	0	0	2	0
ENSG00000050628.19	594	765	715	333	349	301
ENSG00000235782.1	0	1	0	2	0	1
ENSG00000269933.1	3	2	5	3	0	4
ENSG00000235079.1	6	9	9	6	11	10
ENSG00000132485.11	988	1341	1181	1674	1490	1495
ENSG00000207721.1	1	6	6	7	10	9
ENSG00000229956.8	18	24	19	22	20	29
ENSG00000264239.1	0	0	0	0	0	0
ENSG00000237726.1	0	1	2	0	1	1
ENSG00000226324.1	0	0	1	0	0	0
ENSG00000172260.12	361	390	375	706	801	525
ENSG00000231985.1	0	0	2	2	4	0
ENSG00000271618.1	0	0	1	0	0	0
ENSG00000228853.1	0	1	0	1	0	0
ENSG00000233994.2	3	5	15	8	8	2
ENSG00000227207.2	0	1	1	1	0	2
ENSG00000212366.1	0	0	2	0	0	0
ENSG00000225087.1	7	6	6	0	3	3
ENSG00000227016.2	0	0	0	1	1	0
ENSG00000280317.1	0	0	0	0	0	0
ENSG00000229636.2	0	0	0	0	0	0
ENSG00000251825.1	0	0	0	0	0	0
ENSG00000233973.4	0	0	0	0	0	0
ENSG00000223479.3	0	1	0	1	1	1
ENSG00000200601.1	0	0	0	0	0	0
ENSG00000252005.2	0	0	0	0	0	0
ENSG00000162620.14	5	5	2	4	0	2
ENSG00000254685.5	245	333	274	295	329	290
ENSG00000259030.5	197	245	260	761	548	748
ENSG00000116783.13	99	204	118	328	261	309
ENSG00000237324.3	28	34	40	75	59	67
ENSG00000233894.1	16	18	11	42	43	34
ENSG00000162621.6	60	58	52	129	105	108
[truncated: 58,576 more rows]

## Sheet: RNAseq_TPM
gene_id	transcript_id(s)	length	effective_length	expected_count	Control_rep1_TPM	Control_rep1_FPKM	Control_rep2_TPM	Control_rep2_FPKM	Control_rep3_TPM	Control_rep3_FPKM	Chir4uM_rep1_TPM	Chir4uM_rep1_FPKM	Chir4uM_rep2_TPM	Chir4uM_rep2_FPKM	Chir4uM_rep3_TPM	Chir4uM_rep3_FPKM
ENSG00000000003.13	ENST00000373020.7,ENST00000494424.1,ENST00000496771.4,ENST00000612152.3,ENST00000614008.3	2212.41	1963.12	666	7.7	14.36	10.26	16.85	10.91	17.18	11.32	18.09	11.05	16.87	9.95	15.33
ENSG00000000005.5	ENST00000373031.4,ENST00000485971.1	1339	1089.71	10	0.21	0.39	0.67	1.11	0.34	0.53	0.61	0.97	0.44	0.66	0.33	0.5
ENSG00000000419.11	ENST00000371582.7,ENST00000371584.7,ENST00000371588.8,ENST00000413082.1,ENST00000466152.4,ENST00000494752.1	1079.18	829.89	293	8.01	14.94	11.25	18.47	11.48	18.08	15.17	24.24	15.09	23.03	15.77	24.3
ENSG00000000457.12	ENST00000367770.4,ENST00000367771.9,ENST00000367772.7,ENST00000423670.1,ENST00000470238.1	4357.85	4108.56	224.94	1.24	2.32	1.6	2.62	1.95	3.06	1.66	2.65	1.49	2.28	1.64	2.52
ENSG00000000460.15	ENST00000286031.9,ENST00000359326.7,ENST00000413811.3,ENST00000459772.4,ENST00000466580.5,ENST00000472795.4,ENST00000481744.4,ENST00000496973.4,ENST00000498289.4	1714.32	1465.04	84.06	1.3	2.43	1.2	1.97	1.65	2.59	2.96	4.73	2.86	4.36	3.24	4.99
ENSG00000000938.11	ENST00000374003.6,ENST00000374004.4,ENST00000374005.6,ENST00000399173.4,ENST00000457296.4,ENST00000468038.1,ENST00000475472.4	1701.46	1452.17	20	0.31	0.58	0.33	0.54	0.33	0.51	0.17	0.28	0.09	0.14	0.21	0.33
ENSG00000000971.14	ENST00000359637.2,ENST00000367429.7,ENST00000466229.4,ENST00000470918.1,ENST00000496761.1,ENST00000630130.1	3350.02	3100.74	1471	10.76	20.08	12.03	19.76	14.9	23.46	0.88	1.41	0.91	1.39	0.81	1.24
ENSG00000001036.12	ENST00000002165.9,ENST00000367585.1,ENST00000451668.1	1930.43	1681.17	799.95	10.8	20.14	13.88	22.8	11.79	18.57	16.78	26.82	14.59	22.28	17.51	26.99
ENSG00000001084.9	ENST00000229416.9,ENST00000504353.1,ENST00000504525.1,ENST00000505197.1,ENST00000505294.4,ENST00000509541.4,ENST00000510837.4,ENST00000513939.4,ENST00000514004.4,ENST00000514373.2,ENST00000514933.1,ENST00000515580.1,ENST00000616923.3	1941.05	1692.03	635	8.52	15.88	11.09	18.21	10.88	17.13	8.65	13.83	10.53	16.08	8.07	12.43
ENSG00000001167.13	ENST00000341376.9,ENST00000353205.5	3075.84	2826.56	719	5.77	10.76	5.76	9.46	6.24	9.82	7.24	11.58	9.97	15.22	7.56	11.65
ENSG00000001460.16	ENST00000003583.11,ENST00000337248.7,ENST00000374409.4,ENST00000435187.1,ENST00000438866.1,ENST00000468303.4,ENST00000475760.1,ENST00000483261.1,ENST00000483528.1,ENST00000492753.1,ENST00000497384.1,ENST00000498488.4	2550.97	2301.79	201	1.98	3.7	2.1	3.46	2.32	3.65	2.55	4.07	3	4.58	3.17	4.89
ENSG00000001461.15	ENST00000003912.6,ENST00000339255.2,ENST00000358028.7,ENST00000374399.7,ENST00000432012.1,ENST00000475663.2,ENST00000488155.1	3814.83	3565.54	1248	7.94	14.81	9.67	15.87	9.8	15.43	2.35	3.76	2.86	4.36	2.5	3.86
ENSG00000001497.15	ENST00000374804.8,ENST00000374807.8,ENST00000374811.6,ENST00000469091.1,ENST00000484069.1	2186.01	1937.2	264	3.09	5.77	3.06	5.02	4.1	6.45	3.61	5.78	3.17	4.84	3.08	4.75
ENSG00000001561.6	ENST00000321037.4	4651	4401.71	712	3.67	6.85	5.04	8.27	5.45	8.59	4.45	7.11	4.6	7.01	4.49	6.91
ENSG00000001617.10	ENST00000002829.6,ENST00000413852.4,ENST00000414301.4,ENST00000420831.1,ENST00000426511.4,ENST00000434342.4,ENST00000450338.4,ENST00000470737.1,ENST00000493743.1	2850.25	2600.97	231	2.02	3.76	1.78	2.92	2.74	4.31	0.89	1.42	0.76	1.17	0.66	1.02
ENSG00000001626.13	ENST00000003084.9,ENST00000426809.4,ENST00000429014.1,ENST00000446805.1,ENST00000468795.1,ENST00000472848.1,ENST00000546407.1,ENST00000600166.1,ENST00000608965.4,ENST00000610149.1,ENST00000621535.1	6132	5882.71	6	0.02	0.04	0.09	0.15	0.34	0.54	0.38	0.61	0.55	0.84	0.44	0.68
ENSG00000001629.8	ENST00000265742.6,ENST00000413588.1,ENST00000422095.1,ENST00000439883.1,ENST00000442183.1,ENST00000465883.1,ENST00000486698.1	3955.3	3706.14	1807	11.06	20.63	11.31	18.57	11.14	17.54	11.48	18.34	10.77	16.43	9.85	15.17
ENSG00000001630.14	ENST00000003100.11,ENST00000422867.1,ENST00000435873.1,ENST00000450723.4,ENST00000482924.1	2842.37	2593.09	2280	19.95	37.21	24.22	39.77	25.91	40.8	44.32	70.83	45.06	68.79	51.47	79.32
ENSG00000001631.13	ENST00000340022.5,ENST00000394503.5,ENST00000394505.5,ENST00000394507.4,ENST00000412043.5,ENST00000413688.4,ENST00000422347.4,ENST00000425073.1,ENST00000425919.4,ENST00000430102.4,ENST00000433016.4,ENST00000440209.4,ENST00000444960.4,ENST00000445516.1,ENST00000452773.4,ENST00000454017.4,ENST00000458177.4,ENST00000458493.4,ENST00000466166.1,ENST00000470309.4,ENST00000475770.4,ENST00000486261.4,ENS…	1728.97	1479.86	751.81	11.53	21.5	14.15	23.23	14.16	22.29	17.16	27.42	19.63	29.97	19.45	29.97
ENSG00000002016.15	ENST00000228345.8,ENST00000358495.6,ENST00000397230.5,ENST00000430095.5,ENST00000461568.4,ENST00000463750.4,ENST00000468231.4,ENST00000481052.4,ENST00000488642.5,ENST00000535376.4,ENST00000536177.4,ENST00000539046.4,ENST00000541619.1,ENST00000542297.1,ENST00000542584.4,ENST00000542785.4,ENST00000543912.4,ENST00000544742.4,ENST00000545564.4,ENST00000545967.1	2121.4	1872.21	165.52	2.01	3.74	2.42	3.98	2.65	4.17	2.68	4.28	2.47	3.77	2.57	3.96
ENSG00000002079.11	ENST00000413734.1,ENST00000425880.1,ENST00000429079.1,ENST00000439784.4,ENST00000452010.1,ENST00000453194.1,ENST00000453378.1	1366.43	1119.34	0	0	0	0	0	0	0	0.68	1.09	0	0	0	0
ENSG00000002330.12	ENST00000309032.6,ENST00000394531.3,ENST00000394532.6,ENST00000492141.1,ENST00000493798.1,ENST00000544271.1,ENST00000544785.1	926.14	676.87	261.27	8.76	16.33	9.87	16.21	12.87	20.26	12.44	19.88	12.69	19.37	11.44	17.63
ENSG00000002549.11	ENST00000226299.7,ENST00000503467.1,ENST00000504614.4,ENST00000507960.1,ENST00000508014.4,ENST00000508497.4,ENST00000509583.1,ENST00000512397.1,ENST00000513105.1,ENST00000606142.4,ENST00000618908.3	1397.39	1148.12	578	11.42	21.3	13.26	21.77	12.67	19.95	18.33	29.29	20.8	31.76	18.29	28.19
ENSG00000002586.16	ENST00000381177.4,ENST00000381180.6,ENST00000381184.4,ENST00000381187.6,ENST00000381192.6,ENST00000449611.4,ENST00000482293.4,ENST00000482405.5,ENST00000497752.4,ENST00000611428.3,ENST00000623253.2,ENST00000624481.2	1186.18	936.9	2723	65.95	122.99	74.32	122.02	74.6	117.45	82.02	131.08	85.32	130.25	77.09	118.78
ENSG00000002587.8	ENST00000002596.5,ENST00000510712.1,ENST00000514690.4	8031	7781.71	1	0	0.01	0.02	0.03	0.02	0.03	0.04	0.06	0.02	0.04	0.05	0.07
ENSG00000002726.18	ENST00000360937.7,ENST00000416793.5,ENST00000460213.1,ENST00000467291.4,ENST00000480582.1,ENST00000483043.1,ENST00000493429.4,ENST00000619575.1,ENST00000622116.3	1682.32	1433.03	10	0.16	0.3	0.13	0.21	0.11	0.17	0	0	0	0	0.01	0.02
ENSG00000002745.11	ENST00000222462.2,ENST00000361301.5	3147	2897.71	5	0.04	0.07	0	0	0.03	0.04	0.03	0.04	0.04	0.06	0.06	0.1
ENSG00000002746.13	ENST00000395891.5,ENST00000429529.1,ENST00000453890.4,ENST00000461842.1,ENST00000464944.1,ENST00000471043.1,ENST00000471527.1,ENST00000481031.4,ENST00000490954.2,ENST00000492310.4,ENST00000493057.1	9501	9251.71	2	0	0.01	0.1	0.17	0.09	0.14	0.1	0.16	0.13	0.2	0.05	0.07
ENSG00000002822.14	ENST00000265854.10,ENST00000399654.5,ENST00000402746.4,ENST00000406869.4,ENST00000421113.4,ENST00000429625.4,ENST00000429779.1,ENST00000437877.1,ENST00000438959.4,ENST00000444373.5,ENST00000445959.4,ENST00000450235.4,ENST00000455998.4,ENST00000459731.1,ENST00000464742.4,ENST00000468372.4,ENST00000469871.1,ENST00000477172.1,ENST00000481633.1,ENST00000483165.4,ENST00000486340.4,ENST00000491858.4,EN…	1469.29	1220.33	256	4.76	8.88	4.17	6.84	6.13	9.65	5.53	8.84	5.28	8.07	7.33	11.29
ENSG00000002834.16	ENST00000318008.9,ENST00000419929.1,ENST00000433206.5,ENST00000435347.6,ENST00000443937.6,ENST00000579123.1,ENST00000581485.1,ENST00000584106.1,ENST00000585841.4	3768.82	3519.53	9459	60.98	113.73	52.57	86.31	65.88	103.72	15.05	24.05	18.82	28.72	13.63	21.01
ENSG00000002919.13	ENST00000359238.5,ENST00000393405.5,ENST00000452859.5,ENST00000577310.1,ENST00000578861.4,ENST00000580219.4,ENST00000580875.1,ENST00000581298.4,ENST00000581705.4,ENST00000582104.4,ENST00000582481.1,ENST00000583320.4,ENST00000584335.4	1740.21	1491.03	396	6.03	11.24	6.63	10.89	6.26	9.86	5.59	8.93	6.79	10.36	5.02	7.73
ENSG00000002933.6	ENST00000004103.6,ENST00000461345.4,ENST00000462826.1,ENST00000468689.1,ENST00000474166.1,ENST00000475007.4,ENST00000475536.4,ENST00000475710.1,ENST00000481305.1,ENST00000484928.4,ENST00000494349.4	1286.78	1037.49	304	6.65	12.4	6.84	11.23	7.99	12.58	2.62	4.19	2.34	3.57	4	6.17
ENSG00000003056.6	ENST00000000412.6,ENST00000536844.4,ENST00000537621.1,ENST00000539143.4,ENST00000540837.1,ENST00000541507.4,ENST00000543159.1,ENST00000543258.1,ENST00000543704.4,ENST00000543834.1,ENST00000543845.1,ENST00000544193.1,ENST00000544245.1	1680.48	1431.27	1991.28	31.57	58.88	40.87	67.11	35.59	56.04	38.48	61.49	38.73	59.12	39.18	60.37
ENSG00000003096.12	ENST00000262820.6,ENST00000371876.4,ENST00000371878.4,ENST00000371882.4,ENST00000447671.5,ENST00000453826.1,ENST00000469946.4,ENST00000539496.4,ENST00000540167.4,ENST00000541812.4,ENST00000545703.4	2904.68	2655.39	1075	9.19	17.13	13.06	21.44	10.92	17.2	12.93	20.66	15.77	24.08	14.84	22.87
ENSG00000003137.7	ENST00000001146.5,ENST00000412253.1,ENST00000461519.1,ENST00000474509.1,ENST00000546307.4	3287.29	3038.1	258	1.93	3.59	1.65	2.7	1.7	2.68	0.74	1.18	0.71	1.08	0.55	0.85
ENSG00000003147.16	ENST00000265577.10,ENST00000317367.8,ENST00000339809.9,ENST00000396675.6,ENST00000401396.4,ENST00000402384.6,ENST00000406470.5,ENST00000407906.4,ENST00000422063.5,ENST00000430867.4,ENST00000446305.1,ENST00000447326.4,ENST00000455539.4,ENST00000457755.4,ENST00000470696.1,ENST00000476942.1,ENST00000486677.1,ENST00000490041.1	1402.09	1153.07	282	5.55	10.35	9.6	15.75	7.91	12.45	5.6	8.96	5.06	7.73	5.93	9.14
ENSG00000003249.12	ENST00000002501.9,ENST00000304733.6,ENST00000392973.6,ENST00000568330.2,ENST00000568662.1,ENST00000568838.1,ENST00000623401.1	2099.43	1850.14	237	2.91	5.42	2.84	4.66	3.52	5.54	3.04	4.86	2.82	4.31	3.45	5.32
ENSG00000003393.13	ENST00000264276.9,ENST00000409632.5,ENST00000410052.1,ENST00000439495.4,ENST00000462747.1,ENST00000467448.4,ENST00000482789.4,ENST00000482891.4,ENST00000483703.1,ENST00000489440.4,ENST00000494017.4,ENST00000496244.4	5526.17	5276.9	1844	7.93	14.79	9.77	16.04	9.12	14.35	7.56	12.09	7.73	11.8	8.69	13.39
ENSG00000003400.13	ENST00000272879.8,ENST00000286186.9,ENST00000313728.10,ENST00000346817.8,ENST00000360132.6,ENST00000374650.6,ENST00000438843.4,ENST00000448480.1,ENST00000460140.4,ENST00000471191.1,ENST00000484926.1,ENST00000485408.1,ENST00000492363.4	3080.5	2831.73	41	0.33	0.61	0.16	0.26	0.39	0.61	0.24	0.39	0.24	0.36	0.21	0.32
ENSG00000003402.18	ENST00000309955.6,ENST00000340870.6,ENST00000341222.9,ENST00000341582.9,ENST00000342795.8,ENST00000395148.5,ENST00000417748.1,ENST00000423241.5,ENST00000425030.1,ENST00000433445.1,ENST00000439154.5,ENST00000440180.4,ENST00000441224.4,ENST00000443227.4,ENST00000457277.4,ENST00000460961.1,ENST00000461422.1,ENST00000461820.4,ENST00000462763.4,ENST00000470178.5,ENST00000470664.1,ENST00000474842.1,ENS…	3956.26	3707.09	984	6.02	11.23	7.16	11.76	6.89	10.85	4.23	6.76	5.5	8.39	6.07	9.35
ENSG00000003436.13	ENST00000233156.6,ENST00000339091.7,ENST00000392365.4,ENST00000409676.4,ENST00000417013.4,ENST00000420747.1,ENST00000421427.4,ENST00000426055.4,ENST00000435414.4,ENST00000437725.4,ENST00000453013.4,ENST00000481132.4,ENST00000481389.1	2285.53	2036.27	835	9.3	17.35	8.82	14.48	14.44	22.74	4.23	6.77	4.4	6.72	5.06	7.8
ENSG00000003509.14	ENST00000002125.7,ENST00000336237.9,ENST00000416653.4,ENST00000419278.2,ENST00000431821.4,ENST00000432075.1,ENST00000439218.4,ENST00000441905.1,ENST00000455230.4,ENST00000469831.1,ENST00000474154.4,ENST00000474257.4,ENST00000483999.4	1636.14	1386.86	151	2.47	4.61	3.13	5.14	3.76	5.91	3.16	5.05	2.61	3.98	2.92	4.5
ENSG00000003756.15	ENST00000347869.6,ENST00000395174.5,ENST00000404526.5,ENST00000417905.1,ENST00000433556.5,ENST00000437500.4,ENST00000438369.4,ENST00000441305.4,ENST00000441812.5,ENST00000461242.1,ENST00000462025.1,ENST00000464087.5,ENST00000464988.1,ENST00000469838.4,ENST00000471995.4,ENST00000474470.1,ENST00000474818.4,ENST00000475128.4,ENST00000475590.4,ENST00000479275.1,ENST00000489437.1,ENST00000492430.1,ENS…	2127.52	1878.31	1515.96	18.31	34.15	23.83	39.12	25.4	39.99	40.73	65.09	38.78	59.21	41.67	64.21
ENSG00000003987.12	ENST00000180173.8,ENST00000517317.4,ENST00000518272.4,ENST00000519122.4,ENST00000519590.4,ENST00000519763.1,ENST00000521177.1,ENST00000521857.4,ENST00000523571.1	3414.33	3165.08	101	0.72	1.35	0.93	1.52	0.68	1.08	1.5	2.4	1.05	1.6	1.53	2.36
ENSG00000003989.15	ENST00000004531.13,ENST00000398090.3,ENST00000470360.4,ENST00000494857.4,ENST00000522656.4	7352.68	7103.4	865	2.76	5.15	3.06	5.02	3.16	4.98	3.73	5.96	3.52	5.38	3.49	5.38
ENSG00000004059.9	ENST00000000233.8,ENST00000415666.1,ENST00000459680.1,ENST00000463733.4,ENST00000467281.4,ENST00000489673.1	884.42	635.28	1209.9	43.22	80.6	46.24	75.93	44.42	69.94	42.71	68.25	61.41	93.74	46.25	71.26
ENSG00000004139.12	ENST00000379061.7,ENST00000577870.2,ENST00000578128.4,ENST00000579593.1,ENST00000580711.1,ENST00000582323.1,ENST00000585453.4,ENST00000585482.4	3258.01	3008.72	461.22	3.48	6.49	3.66	6.01	3.85	6.06	1.99	3.18	2.16	3.3	1.85	2.86
ENSG00000004142.10	ENST00000540200.4,ENST00000618887.2	2121	1871.71	1894	22.96	42.82	26.43	43.4	27.82	43.8	30.2	48.25	31.17	47.59	31.32	48.27
ENSG00000004399.11	ENST00000324093.7,ENST00000501038.5,ENST00000503166.1,ENST00000504524.4,ENST00000504689.1,ENST00000504767.4,ENST00000504979.1,ENST00000505237.2,ENST00000505505.1,ENST00000505665.4,ENST00000506979.1,ENST00000508630.1,ENST00000511018.1,ENST00000512744.4,ENST00000512807.1,ENST00000514990.1,ENST00000515191.1	5124.87	4875.71	2213	10.3	19.21	11.92	19.57	13.1	20.62	6.35	10.14	7.84	11.96	7.89	12.16
ENSG00000004455.15	ENST00000354858.9,ENST00000373449.5,ENST00000466029.1,ENST00000467905.4,ENST00000469238.1,ENST00000480134.4,ENST00000482191.1,ENST00000487289.1,ENST00000491241.1,ENST00000548033.4,ENST00000548559.1,ENST00000550338.4,ENST00000551979.1,ENST00000626911.1,ENST00000629371.1	1259.82	1010.57	1639.87	36.82	68.67	45.69	75.01	48.76	76.76	55.8	89.17	55.67	84.99	60.66	93.48
ENSG00000004468.11	ENST00000226279.6,ENST00000502843.4,ENST00000506191.1,ENST00000510674.1,ENST00000511430.1	1563.28	1314.15	11	0.19	0.35	0.04	0.06	0.07	0.11	0	0	0.04	0.06	0	0
ENSG00000004478.7	ENST00000001008.5,ENST00000538622.1,ENST00000539181.1,ENST00000540260.1,ENST00000543037.1,ENST00000543769.1,ENST00000544366.1,ENST00000630279.1	3611.25	3361.97	2028	13.69	25.53	15.8	25.94	15.83	24.92	12.64	20.2	13.29	20.29	14.18	21.84
ENSG00000004487.14	ENST00000356634.6,ENST00000400181.7,ENST00000465864.1,ENST00000481879.1,ENST00000494920.1,ENST00000602503.1	1706.79	1457.67	1521	23.68	44.16	27.73	45.53	31.26	49.22	42.88	68.52	44.86	68.49	40.03	61.68
ENSG00000004534.13	ENST00000266022.7,ENST00000419610.4,ENST00000421682.1,ENST00000422955.4,ENST00000425608.4,ENST00000433811.1,ENST00000434592.4,ENST00000438912.1,ENST00000441115.4,ENST00000442092.4,ENST00000443081.4,ENST00000446471.1,ENST00000454079.4,ENST00000464013.4,ENST00000466247.1,ENST00000478026.1,ENST00000483350.1,ENST00000488807.2,ENST00000491874.4,ENST00000493652.1	2682.62	2433.56	789	7.36	13.72	8.86	14.55	8.39	13.21	15.42	24.64	10.5	16.03	13.3	20.49
ENSG00000004660.13	ENST00000158166.5,ENST00000348335.5,ENST00000381769.5,ENST00000573483.1	3465.77	3216.48	48	0.34	0.63	0.49	0.8	0.43	0.68	1.21	1.93	1.09	1.66	1.03	1.59
ENSG00000004700.14	ENST00000314748.9,ENST00000396093.6,ENST00000421138.5,ENST00000444129.5,ENST00000536240.4,ENST00000536964.4,ENST00000539672.1,ENST00000542432.4	2120.66	1871.44	466.12	5.65	10.54	5.41	8.89	6.69	10.54	5.97	9.54	5.45	8.32	4.22	6.5
ENSG00000004766.14	ENST00000251739.8,ENST00000305866.8,ENST00000436177.4,ENST00000438395.4,ENST00000441602.4,ENST00000443443.1,ENST00000458530.1,ENST00000458707.1,ENST00000467326.4,ENST00000471188.4,ENST00000474412.1,ENST00000476413.1,ENST00000477572.1,ENST00000477935.1,ENST00000480943.4,ENST00000484954.1,ENST00000485140.1,ENST00000485994.4,ENST00000495039.1,ENST00000544910.4	3287.12	3037.85	531	3.97	7.4	6.83	11.21	5.98	9.41	7.31	11.69	11.56	17.65	10.57	16.28
ENSG00000004776.10	ENST00000004982.4,ENST00000587965.1,ENST00000592984.4	1458	1208.71	78	1.46	2.73	2.84	4.66	2.31	3.64	0.98	1.56	0.9	1.38	1.33	2.05
ENSG00000004777.17	ENST00000007510.7,ENST00000221905.1,ENST00000314737.8,ENST00000378944.8,ENST00000586918.1,ENST00000587447.3,ENST00000587984.1,ENST00000588248.5,ENST00000589133.4,ENST00000590893.4,ENST00000591438.1,ENST00000593034.4,ENST00000601474.4	2443.97	2194.71	203	2.1	3.91	2.29	3.75	2.88	4.53	7.33	11.72	7.92	12.08	8.36	12.88
ENSG00000004779.8	ENST00000007516.6,ENST00000484769.1,ENST00000562133.4,ENST00000567761.1,ENST00000570319.4	717.68	468.42	467	22.62	42.19	30.32	49.78	27.28	42.94	42.63	68.13	38.2	58.31	45.62	70.3
ENSG00000004799.7	ENST00000005178.5,ENST00000468445.1,ENST00000473301.1,ENST00000473796.1,ENST00000498190.1	3576	3326.71	165	1.13	2.1	1.71	2.81	1.56	2.46	0.39	0.63	0.49	0.75	0.51	0.79
ENSG00000004809.12	ENST00000330550.7,ENST00000368919.6,ENST00000424139.1,ENST00000434949.4,ENST00000437378.4,ENST00000451557.4,ENST00000460159.1,ENST00000461487.1	1391.75	1142.67	0	0	0	0	0	0	0	0	0	0	0	0	0
ENSG00000004838.12	ENST00000231749.6,ENST00000360165.6,ENST00000431869.1,ENST00000442887.1,ENST00000443080.4,ENST00000468182.1,ENST00000475688.1,ENST00000478269.4,ENST00000490675.4	1591.76	1342.48	9	0.15	0.28	0.17	0.29	0.12	0.19	0.48	0.77	0.29	0.45	0.57	0.88
ENSG00000004846.15	ENST00000258738.9,ENST00000404938.5,ENST00000406935.4,ENST00000441315.1,ENST00000443026.5,ENST00000477094.4	2554	2304.72	0	0	0	0	0	0	0	0	0	0	0	0	0
ENSG00000004848.6	ENST00000379044.4	2876	2626.71	1	0.01	0.02	0.01	0.01	0.01	0.02	0	0	0.02	0.03	0	0
ENSG00000004864.12	ENST00000265631.8,ENST00000416240.5,ENST00000472162.2,ENST00000484495.4,ENST00000487710.1,ENST00000490072.4,ENST00000492869.1,ENST00000494085.1	2656.72	2407.49	572	5.39	10.05	7.53	12.37	7.65	12.04	10.13	16.19	10.79	16.48	10.83	16.7
ENSG00000004866.17	ENST00000265437.8,ENST00000323984.6,ENST00000393443.4,ENST00000393444.6,ENST00000393446.5,ENST00000393447.7,ENST00000393449.4,ENST00000393451.6,ENST00000417919.4,ENST00000420755.4,ENST00000421345.4,ENST00000422922.4,ENST00000432298.4,ENST00000434836.4,ENST00000438863.4,ENST00000443979.4,ENST00000446490.4,ENST00000449366.4,ENST00000462544.1,ENST00000464020.1,ENST00000465133.4,ENST00000465641.4,ENS…	1984.92	1735.74	859.62	11.24	20.96	12.93	21.23	12.34	19.43	17.49	27.95	14.51	22.16	14.16	21.82
ENSG00000004897.10	ENST00000066544.6,ENST00000525495.5,ENST00000526866.4,ENST00000527547.4,ENST00000528147.1,ENST00000528748.4,ENST00000531206.4,ENST00000532575.1,ENST00000532893.4,ENST00000533415.4,ENST00000570740.1,ENST00000570818.4,ENST00000571643.4,ENST00000573502.1,ENST00000573550.4,ENST00000574304.4,ENST00000575483.4,ENST00000575830.2,ENST00000576484.1	2729.29	2480.26	2426	22.19	41.39	25.99	42.68	24.72	38.92	39.26	62.74	42.39	64.71	33.4	51.47
ENSG00000004939.12	ENST00000262418.9,ENST00000399246.3,ENST00000471005.4,ENST00000497360.4,ENST00000498270.1,ENST00000631130.1	2175.67	1927.23	0	0	0	0	0	0	0	0	0	0	0	0	0
ENSG00000004948.12	ENST00000359558.5,ENST00000360249.7,ENST00000394441.4,ENST00000415529.2,ENST00000421592.4,ENST00000423724.4,ENST00000426151.4	2191	1941.71	0	0	0	0.02	0.03	0	0	0	0	0.02	0.03	0.02	0.04
ENSG00000004961.13	ENST00000321143.7,ENST00000380762.4,ENST00000380763.6	1661.77	1412.48	705	11.33	21.12	15.49	25.43	15.74	24.78	17.24	27.56	16.75	25.57	19.41	29.92
ENSG00000004975.10	ENST00000005340.8,ENST00000571745.1,ENST00000572285.4,ENST00000573354.1,ENST00000574143.1,ENST00000574591.1,ENST00000574642.4,ENST00000575086.1,ENST00000575458.4,ENST00000575756.4,ENST00000576285.1,ENST00000576439.1,ENST00000576840.4,ENST00000576949.1,ENST00000577154.1	2238.21	1989.3	1106	12.62	23.53	14.6	23.97	13.48	21.22	22.46	35.9	24.42	37.28	22.9	35.28
ENSG00000005001.8	ENST00000161006.6,ENST00000570950.1,ENST00000571228.1,ENST00000572061.1,ENST00000574768.4,ENST00000575164.1,ENST00000576381.1,ENST00000577177.1	835.25	586.63	0	0	0	0	0	0	0	0	0	0	0	0	0
ENSG00000005007.11	ENST00000262803.8,ENST00000594243.1,ENST00000594504.4,ENST00000596842.4,ENST00000598209.4,ENST00000598471.1,ENST00000599848.4,ENST00000600012.4,ENST00000600310.4,ENST00000600689.1,ENST00000600868.4,ENST00000601689.1,ENST00000601981.4	4765.82	4516.57	2045	10.27	19.16	12.69	20.84	11.03	17.37	8.63	13.78	10.08	15.39	9.73	14.99
ENSG00000005020.11	ENST00000345317.5,ENST00000432747.1,ENST00000468712.4,ENST00000481204.4,ENST00000487720.1,ENST00000489977.4,ENST00000490456.5,ENST00000495802.4,ENST00000497511.4	3998	3748.71	107	0.65	1.21	0.82	1.35	0.97	1.53	0.4	0.63	0.42	0.64	0.49	0.76
ENSG00000005022.5	ENST00000317881.8,ENST00000460013.1,ENST00000463551.1,ENST00000475354.1	1240.83	991.54	4133.99	94.61	176.44	115.31	189.31	110.39	173.8	229.75	367.17	220.25	336.23	250.47	385.96
ENSG00000005059.14	ENST00000394650.6,ENST00000452915.3,ENST00000472310.4,ENST00000494604.1,ENST00000515114.2	933.94	686.04	89	2.94	5.49	3.15	5.17	3.05	4.8	4.65	7.44	3.31	5.06	2.5	3.85
ENSG00000005073.5	ENST00000006015.3,ENST00000517402.1	2137	1887.71	1	0.01	0.02	0.01	0.02	0.01	0.02	0.04	0.06	0	0	0.02	0.02
ENSG00000005075.14	ENST00000292614.8,ENST00000393794.4	929.2	679.91	431.27	14.39	26.84	17.48	28.7	15.41	24.26	20.12	32.15	22.75	34.73	18.33	28.25
ENSG00000005100.11	ENST00000225296.6,ENST00000433302.6,ENST00000572490.1,ENST00000574023.1,ENST00000575153.4	4637.17	4387.88	674	3.49	6.5	3.7	6.08	3.71	5.85	3.67	5.86	3.52	5.38	4.37	6.73
ENSG00000005102.11	ENST00000318579.7,ENST00000329168.3,ENST00000393661.2,ENST00000549132.1	1667.59	1418.3	6	0.1	0.18	0.17	0.28	0.34	0.54	0	0	0	0	0.03	0.05
ENSG00000005108.14	ENST00000408005.2,ENST00000423059.7,ENST00000480061.1,ENST00000497575.1,ENST00000617773.1	6846.45	6597.16	101	0.35	0.65	0.57	0.94	0.48	0.76	0.83	1.32	0.79	1.21	0.85	1.31
ENSG00000005156.10	ENST00000262327.8,ENST00000378526.7,ENST00000585370.1,ENST00000585740.4,ENST00000585941.4,ENST00000586058.1,ENST00000586119.1,ENST00000586407.1,ENST00000586435.1,ENST00000588109.4,ENST00000588713.1,ENST00000590181.4,ENST00000590630.4,ENST00000592244.1,ENST00000592690.1,ENST00000593099.4	2567.21	2318	1054.57	10.32	19.25	12.57	20.63	14.62	23.02	15.63	24.98	17.87	27.27	18.29	28.19
ENSG00000005175.8	ENST00000005386.6,ENST00000380650.4,ENST00000432584.6,ENST00000547706.1,ENST00000548211.1,ENST00000548296.1,ENST00000551293.1	2290.4	2041.33	724	8.05	15.01	8.96	14.72	10.91	17.17	12.93	20.66	12.16	18.57	11.7	18.03
ENSG00000005187.10	ENST00000289416.8,ENST00000440284.5,ENST00000501740.5,ENST00000561499.1,ENST00000561584.4,ENST00000561795.4,ENST00000562251.4,ENST00000563914.1,ENST00000564701.1,ENST00000567006.1,ENST00000567387.4,ENST00000567711.1,ENST00000568235.4,ENST00000569141.1,ENST00000614721.1	2383.99	2134.7	33.48	0.36	0.66	0.4	0.66	1.37	2.16	0.27	0.43	0.58	0.89	0.48	0.73
ENSG00000005189.18	ENST00000261377.9,ENST00000348433.9,ENST00000561474.1,ENST00000563045.1,ENST00000563068.1,ENST00000563617.1,ENST00000564200.1,ENST00000564274.4,ENST00000565340.4,ENST00000566276.4,ENST00000566518.4,ENST00000566993.4,ENST00000567297.4,ENST00000568046.4,ENST00000568334.1,ENST00000568476.4,ENST00000568501.4,ENST00000568647.4,ENST00000568894.4	1670.79	1421.62	140	2.23	4.17	2.54	4.17	2.32	3.66	9.62	15.38	8.26	12.6	8.03	12.38
ENSG00000005194.13	ENST00000394391.7,ENST00000563341.1,ENST00000563561.1,ENST00000564885.1,ENST00000565368.4,ENST00000565786.4,ENST00000565961.4,ENST00000566284.1,ENST00000567518.4,ENST00000567751.4,ENST00000568940.4,ENST00000569246.4,ENST00000569370.4,ENST00000569979.4,ENST00000570000.4	1709.49	1460.21	920	14.3	26.66	20.96	34.41	20.2	31.8	21.64	34.57	24.19	36.92	24.36	37.53
ENSG00000005206.15	ENST00000585725.2,ENST00000586111.3,ENST00000586332.4,ENST00000587851.1,ENST00000589515.2,ENST00000593243.4,ENST00000610743.3,ENST00000612623.1,ENST00000613503.3,ENST00000614784.1,ENST00000614794.3,ENST00000618220.3,ENST00000621568.3,ENST00000622308.3	1798.7	1549.83	483	7.07	13.19	5.61	9.2	6.38	10.04	6.01	9.61	9.1	13.9	10.45	16.11
ENSG00000005238.18	ENST00000322813.8,ENST00000378557.1,ENST00000378561.4,ENST00000378566.4,ENST00000488109.5,ENST00000603301.4,ENST00000605104.1,ENST00000605244.4,ENST00000605392.1	3003.82	2754.53	474	3.9	7.28	4.69	7.7	4.67	7.35	4.5	7.2	4.43	6.77	4.74	7.3
ENSG00000005243.8	ENST00000579263.1,ENST00000580174.1,ENST00000580409.4,ENST00000581637.4,ENST00000581756.4,ENST00000583414.4,ENST00000584955.4,ENST00000585182.1,ENST00000612370.3,ENST00000621465.3	820.67	571.4	231	9.17	17.11	9.48	15.56	11.34	17.85	3.72	5.94	3.74	5.71	4.75	7.32
ENSG00000005249.11	ENST00000265717.4,ENST00000393613.5,ENST00000488792.1	3745	3495.71	478	3.1	5.79	4.26	7	3.87	6.09	13.12	20.97	11.21	17.11	10.26	15.81
ENSG00000005302.16	ENST00000312196.7,ENST00000337339.5,ENST00000361672.5,ENST00000380691.2,ENST00000380692.5,ENST00000380693.6,ENST00000398527.5,ENST00000421368.2,ENST00000467141.1,ENST00000468149.4,ENST00000473380.1,ENST00000473806.4,ENST00000476743.4,ENST00000478462.4,ENST00000482871.4,ENST00000483645.4,ENST00000494268.1	2051.45	1802.42	315	3.97	7.4	4.93	8.09	5.61	8.84	6.41	10.24	5.81	8.88	6.37	9.82
ENSG00000005339.11	ENST00000262367.8,ENST00000382070.6,ENST00000570939.1,ENST00000571763.4,ENST00000571826.4,ENST00000572134.1,ENST00000572569.1,ENST00000573517.4,ENST00000573672.1,ENST00000574740.1,ENST00000575237.1,ENST00000576720.1	7181.37	6932.34	6823	22.33	41.65	21.81	35.8	24.9	39.21	28.02	44.78	31.21	47.64	26.15	40.29
ENSG00000005379.14	ENST00000268893.9,ENST00000343736.7,ENST00000577871.1,ENST00000578486.1,ENST00000578511.4,ENST00000580669.4,ENST00000581675.4,ENST00000581692.2,ENST00000582679.1,ENST00000583624.1,ENST00000585149.1	4227.76	3978.8	101	0.58	1.07	0.93	1.53	0.85	1.34	2.82	4.51	1.48	2.25	2.37	3.65
ENSG00000005381.7	ENST00000225275.3,ENST00000577220.1,ENST00000578493.1,ENST00000580005.1,ENST00000581022.1	967.4	725.27	0	0	0	0	0	0	0	0	0	0	0	0	0
ENSG00000005421.7	ENST00000222381.6,ENST00000433729.1,ENST00000462594.1,ENST00000470502.1	2568	2318.71	1	0.01	0.02	0.08	0.13	0	0	0.02	0.04	0.04	0.05	0.03	0.04
ENSG00000005436.12	ENST00000321027.6,ENST00000409857.6,ENST00000427862.1,ENST00000442309.4,ENST00000470197.4,ENST00000470285.1,ENST00000470503.1,ENST00000472230.4,ENST00000486016.1,ENST00000492826.1,ENST00000541687.4	3095.06	2845.78	669	5.33	9.95	6.63	10.88	8.01	12.61	9.44	15.09	9.24	14.1	9.28	14.3
ENSG00000005448.15	ENST00000348227.4,ENST00000409791.4,ENST00000426787.4,ENST00000461531.4,ENST00000465134.4,ENST00000468778.4,ENST00000469321.4,ENST00000469932.4,ENST00000475328.4,ENST00000480089.4,ENST00000482605.1,ENST00000482880.4,ENST00000493982.4	1079.52	830.27	121	3.31	6.17	5.76	9.46	5.11	8.04	11.92	19.05	10.65	16.25	14.24	21.94
ENSG00000005469.10	ENST00000331536.6,ENST00000412227.5,ENST00000419147.5,ENST00000442291.1,ENST00000469785.1,ENST00000479014.1,ENST00000488850.1	3015.04	2765.77	197	1.62	3.01	2.53	4.15	2.38	3.75	2.6	4.16	3.3	5.03	2.49	3.83
ENSG00000005471.14	ENST00000265723.7,ENST00000358400.6,ENST00000359206.6,ENST00000417608.1,ENST00000440025.1,ENST00000453593.4,ENST00000467079.1,ENST00000467983.1,ENST00000469770.1,ENST00000473795.1	2472.69	2223.69	38	0.39	0.72	0.47	0.77	0.34	0.53	0.25	0.4	0.15	0.22	0.18	0.27
ENSG00000005483.18	ENST00000257745.7,ENST00000311117.6,ENST00000334884.8,ENST00000334914.10,ENST00000468607.1,ENST00000473063.1,ENST00000474203.4,ENST00000476671.4,ENST00000478079.1,ENST00000478990.4,ENST00000479838.2,ENST00000480368.4,ENST00000482560.5,ENST00000485619.1,ENST00000495267.4,ENST00000496191.1,ENST00000622386.1	4536.83	4287.71	3110	16.46	30.69	17.57	28.85	19.13	30.11	20.61	32.93	22.32	34.08	20.19	31.11
ENSG00000005486.15	ENST00000006777.9,ENST00000318622.7,ENST00000428119.1,ENST00000454791.1,ENST00000466232.4,ENST00000467406.2,ENST00000468304.1,ENST00000468644.4,ENST00000476218.1	1778.71	1529.42	1161	17.23	32.12	17.49	28.71	21.5	33.85	19.33	30.89	21.24	32.42	17.84	27.5
ENSG00000005513.9	ENST00000293894.3,ENST00000566034.1	3196.18	2946.89	17	0.13	0.24	0.18	0.29	0.25	0.39	0.07	0.12	0.11	0.16	0.12	0.19
ENSG00000005700.13	ENST00000306270.10,ENST00000369751.2,ENST00000445419.5,ENST00000471036.1,ENST00000503400.4,ENST00000503631.4,ENST00000505222.4,ENST00000508381.1,ENST00000510291.4,ENST00000610980.3	5400.15	5150.86	1737	7.65	14.27	9.46	15.53	10.02	15.78	8.37	13.37	9.31	14.21	9.65	14.87
ENSG00000005801.15	ENST00000005082.12,ENST00000330692.10,ENST00000343338.10,ENST00000354599.9,ENST00000399602.7,ENST00000427810.5,ENST00000429541.5,ENST00000438262.5,ENST00000524857.4,ENST00000525313.5,ENST00000525502.4,ENST00000526501.4,ENST00000526540.4,ENST00000526598.1,ENST00000526601.4,ENST00000527386.1,ENST00000528218.4,ENST00000528410.4,ENST00000528636.1,ENST00000528796.4,ENST00000529085.4,ENST00000529228.4,…	2166.7	1917.51	248	2.93	5.47	4.34	7.13	5.62	8.85	5.56	8.88	4.96	7.57	5.27	8.11
ENSG00000005810.16	ENST00000357337.9,ENST00000429715.1,ENST00000462987.2,ENST00000466564.2,ENST00000474882.2,ENST00000482517.4,ENST00000485061.2,ENST00000486679.2,ENST00000491491.1,ENST00000498073.2,ENST00000544440.5,ENST00000612956.3	7070.68	6821.86	2585	8.6	16.04	8.91	14.64	10.97	17.27	9.97	15.93	11.14	17.01	11.35	17.49
ENSG00000005812.9	ENST00000355619.8,ENST00000417323.1,ENST00000470210.1,ENST00000472949.1,ENST00000477982.2,ENST00000485797.2	3355.79	3106.51	1177.93	8.6	16.05	11.78	19.34	13.34	21	11.06	17.68	11.6	17.71	10.79	16.63
ENSG00000005844.16	ENST00000356798.9,ENST00000358164.8,ENST00000433423.2,ENST00000562020.1,ENST00000562652.1,ENST00000562857.4,ENST00000563615.4,ENST00000564118.1,ENST00000564632.1,ENST00000564935.1,ENST00000565348.4,ENST00000565864.4,ENST00000566149.1,ENST00000566267.1,ENST00000568012.4,ENST00000568926.4,ENST00000568987.1,ENST00000569570.4,ENST00000569725.1	1209.55	960.61	4	0.09	0.18	0.01	0.02	0.13	0.21	0.06	0.09	0.09	0.14	0	0
ENSG00000005882.10	ENST00000007708.6,ENST00000503076.1,ENST00000503176.4,ENST00000503614.4,ENST00000505440.4,ENST00000505897.4,ENST00000506242.4,ENST00000506647.1,ENST00000508030.4,ENST00000508960.1,ENST00000510219.2,ENST00000511026.1,ENST00000512204.4,ENST00000512238.1,ENST00000515040.4,ENST00000614357.3	1978.89	1729.71	1845.94	24.22	45.16	26.71	43.85	23.32	36.72	31	49.54	35.55	54.27	32.02	49.33
ENSG00000005884.16	ENST00000007722.10,ENST00000320031.11,ENST00000504417.1,ENST00000505306.4,ENST00000505552.1,ENST00000505612.1,ENST00000506401.5,ENST00000506437.1,ENST00000506827.1,ENST00000507771.4,ENST00000508100.1,ENST00000510809.1,ENST00000512553.4,ENST00000514834.1,ENST00000515147.1,ENST00000570989.1	4215.34	3966.13	7980	45.66	85.15	48.64	79.86	52.3	82.35	15.58	24.9	16.48	25.15	17.31	26.67
ENSG00000005889.14	ENST00000304543.8,ENST00000338565.3,ENST00000379177.4,ENST00000379188.6,ENST00000419690.4,ENST00000428571.4,ENST00000459724.1,ENST00000474385.1,ENST00000480195.1,ENST00000497813.1,ENST00000539115.4	4331.2	4081.98	1601	8.9	16.6	9.73	15.97	11.66	18.37	12.23	19.54	12.24	18.68	11.9	18.33
ENSG00000005893.14	ENST00000200639.7,ENST00000371335.4,ENST00000434600.5,ENST00000486593.4	2694.44	2445.15	2553	23.69	44.19	28.72	47.16	33.63	52.94	22.78	36.41	22.03	33.63	21.17	32.63
ENSG00000005961.16	ENST00000262407.5,ENST00000587295.4,ENST00000588098.1,ENST00000589645.4,ENST00000591990.4,ENST00000592075.4,ENST00000592226.4,ENST00000592253.4,ENST00000592462.4,ENST00000592944.1	3087.42	2838.14	6	0.05	0.09	0.03	0.04	0.04	0.06	0.02	0.03	0.03	0.05	0.56	0.87
ENSG00000005981.11	ENST00000257621.4,ENST00000325885.5,ENST00000428113.4	1984.67	1735.46	0	0	0	0.01	0.01	0	0	0.01	0.01	0.01	0.01	0.09	0.14
ENSG00000006007.10	ENST00000353258.6,ENST00000563645.1,ENST00000564172.1,ENST00000569773.1,ENST00000569899.4	2726.79	2477.5	2283	20.91	39	26.89	44.14	28.42	44.74	28.36	45.32	28.5	43.51	30.4	46.85
ENSG00000006015.16	ENST00000358607.9,ENST00000450195.5,ENST00000595077.1,ENST00000595490.1,ENST00000597371.1,ENST00000598375.4,ENST00000600997.4,ENST00000601736.1	869.51	620.25	114	4.17	7.78	5.74	9.43	6.24	9.83	3.5	5.6	3.18	4.85	5.17	7.96
ENSG00000006016.9	ENST00000392386.6,ENST00000593286.1,ENST00000594325.1,ENST00000596360.1,ENST00000597131.1	1397.4	1148.28	16.15	0.32	0.6	0.67	1.1	1.19	1.87	0.08	0.13	0.1	0.15	0.19	0.29
ENSG00000006025.10	ENST00000007414.6,ENST00000392507.6,ENST00000578461.1,ENST00000579728.4,ENST00000580140.4,ENST00000580226.4,ENST00000580808.1,ENST00000583167.4,ENST00000584698.1,ENST00000585051.1,ENST00000613735.3	3533.19	3283.9	116	0.8	1.49	1.31	2.16	1.1	1.73	1.39	2.22	1.31	1.99	1.43	2.21
ENSG00000006042.10	ENST00000261713.7,ENST00000394642.6,ENST00000395149.5,ENST00000439138.4,ENST00000578289.4,ENST00000579849.4,ENST00000582227.4,ENST00000583120.1,ENST00000583437.2	1530.29	1281.06	1265	22.41	41.79	29.45	48.35	31.48	49.56	17.99	28.75	20.4	31.14	19.36	29.84
ENSG00000006047.11	ENST00000007699.8,ENST00000570627.1,ENST00000570720.1,ENST00000571127.1,ENST00000571464.1,ENST00000571485.4,ENST00000571834.4	1973.77	1724.48	41	0.54	1.01	0.4	0.66	0.35	0.55	0.99	1.58	0.42	0.65	0.59	0.91
ENSG00000006059.3	ENST00000007735.3	1287	1037.71	0	0	0	0	0	0	0	0	0	0	0	0	0
ENSG00000006062.12	ENST00000344686.5,ENST00000376926.7,ENST00000586644.1,ENST00000592267.1,ENST00000617331.1	4460	4210.71	178.91	0.96	1.8	1.28	2.1	1.13	1.78	1.99	3.18	2.36	3.6	2.29	3.53
ENSG00000006071.10	ENST00000302539.7,ENST00000389817.6,ENST00000524561.1,ENST00000525022.1,ENST00000526002.1,ENST00000526037.4,ENST00000526168.4,ENST00000526921.4,ENST00000527905.4,ENST00000528202.4,ENST00000528374.1,ENST00000529967.4,ENST00000530147.4,ENST00000531137.1,ENST00000531642.4,ENST00000531891.1,ENST00000531911.1,ENST00000532220.1,ENST00000532728.4,ENST00000612903.1	901.63	652.45	6	0.21	0.39	0.08	0.14	0.3	0.47	0.07	0.12	0.14	0.21	0.08	0.13
ENSG00000006116.3	ENST00000005284.3	3088	2838.71	0	0	0	0.03	0.06	0	0	0.01	0.01	0.01	0.01	0	0
ENSG00000006118.13	ENST00000005286.7,ENST00000453848.5,ENST00000534983.4,ENST00000535480.1,ENST00000536409.1,ENST00000536928.1,ENST00000537065.1,ENST00000537110.1,ENST00000538090.1,ENST00000540112.1,ENST00000540276.1,ENST00000543732.1,ENST00000544065.4,ENST00000544098.1	3329.22	3079.93	1070	7.88	14.7	8.29	13.61	11.12	17.5	2.61	4.16	2.59	3.96	3.59	5.53
ENSG00000006125.15	ENST00000587805.1,ENST00000588093.1,ENST00000588116.1,ENST00000589774.4,ENST00000590432.4,ENST00000590538.4,ENST00000591561.4,ENST00000591610.4,ENST00000592167.4,ENST00000593014.2,ENST00000610402.3,ENST00000612035.3,ENST00000612116.3,ENST00000614600.3,ENST00000616681.3,ENST00000616784.3,ENST00000618940.3,ENST00000619183.1,ENST00000620039.3,ENST00000621668.3,ENST00000621914.3,ENST00000628168.1	4664.79	4415.51	7092	36.45	67.97	41.21	67.66	45.26	71.25	47.64	76.14	53.79	82.11	48.76	75.14
ENSG00000006128.10	ENST00000319273.8,ENST00000346867.4,ENST00000350485.7,ENST00000491437.1,ENST00000495916.1	975	725.71	2	0.06	0.12	0	0	0.18	0.29	0.14	0.23	0.06	0.08	0.04	0.06
ENSG00000006194.9	ENST00000219069.5,ENST00000538765.2,ENST00000572748.1,ENST00000573578.1,ENST00000574253.1,ENST00000574674.1,ENST00000575332.1,ENST00000575823.1	2058.23	1808.94	326.96	4.1	7.65	3.81	6.26	4.81	7.57	4.36	6.96	4.68	7.14	3.9	6.01
ENSG00000006210.6	ENST00000006053.6,ENST00000563383.1,ENST00000564948.1,ENST00000565912.1	2445.59	2196.41	30	0.31	0.58	0.11	0.18	0.17	0.27	0.11	0.17	0.04	0.07	0.17	0.26
ENSG00000006282.18	ENST00000006658.9,ENST00000356488.7,ENST00000502911.4,ENST00000503063.4,ENST00000503127.4,ENST00000504265.4,ENST00000504271.1,ENST00000504334.4,ENST00000505085.4,ENST00000505336.1,ENST00000505456.5,ENST00000505559.4,ENST00000505656.4,ENST00000508528.1,ENST00000508598.4,ENST00000510917.4,ENST00000511347.4,ENST00000511605.1,ENST00000511845.4,ENST00000511937.4,ENST00000512181.4,ENST00000512416.4,ENS…	1585.52	1337.11	932	15.82	29.5	17.68	29.03	19.57	30.81	19.74	31.54	21.27	32.47	21.15	32.6
ENSG00000006283.16	ENST00000352832.8,ENST00000354983.7,ENST00000358244.8,ENST00000359106.8,ENST00000360761.7,ENST00000416767.7,ENST00000429973.5,ENST00000442258.5,ENST00000502264.4,ENST00000503436.4,ENST00000503485.4,ENST00000503607.4,ENST00000504076.4,ENST00000505165.4,ENST00000506406.4,ENST00000506520.1,ENST00000507336.4,ENST00000507510.5,ENST00000507609.4,ENST00000507896.4,ENST00000510115.4,ENST00000510366.4,ENS…	6634.88	6385.59	913	3.24	6.05	3.9	6.4	2.76	4.34	3.3	5.27	3.39	5.18	3.3	5.08
ENSG00000006327.12	ENST00000326577.7,ENST00000341627.5,ENST00000571351.1,ENST00000573001.4,ENST00000574699.1,ENST00000575124.1,ENST00000575836.1	1046.82	797.53	1518	43.19	80.55	54.48	89.45	48.24	75.95	9.94	15.89	7.65	11.68	11.5	17.73
ENSG00000006377.10	ENST00000493273.2,ENST00000518156.2,ENST00000555308.1	2304	2054.71	1	0.01	0.02	0.04	0.07	0	0	0.01	0.02	0	0	0	0
ENSG00000006432.14	ENST00000381250.7,ENST00000553414.4,ENST00000554024.1,ENST00000554146.1,ENST00000554752.5,ENST00000555993.5,ENST00000611979.3	9594.58	9345.31	556	1.35	2.52	1.33	2.19	1.58	2.49	0.81	1.29	1.15	1.75	1.11	1.71
ENSG00000006451.6	ENST00000005257.5,ENST00000434466.1,ENST00000436179.1,ENST00000466491.1,ENST00000468201.1	2850.85	2601.56	650	5.67	10.57	7.17	11.77	7.21	11.34	10.24	16.37	9.3	14.19	8.98	13.85
ENSG00000006453.12	ENST00000005260.8,ENST00000462558.4,ENST00000473569.1,ENST00000479789.1,ENST00000480580.1	2354.78	2105.5	128.95	1.39	2.59	2.14	3.51	1.2	1.88	1.4	2.24	1.36	2.08	1.64	2.53
ENSG00000006459.9	ENST00000397560.5,ENST00000472616.1,ENST00000478996.1	4658.82	4409.6	644	3.31	6.18	2.95	4.84	3.58	5.64	1.42	2.26	1.68	2.56	1.64	2.52
ENSG00000006468.12	ENST00000242066.8,ENST00000399357.6,ENST00000403527.4,ENST00000403685.4,ENST00000405192.5,ENST00000405218.5,ENST00000405358.7,ENST00000420159.5,ENST00000421381.4,ENST00000430479.4,ENST00000431887.4,ENST00000433547.1,ENST00000438956.4,ENST00000443137.4,ENST00000443608.4,ENST00000460438.4,ENST00000472931.5,ENST00000476355.4,ENST00000476720.5,ENST00000483075.1,ENST00000485475.1,ENST00000493831.1,ENS…	2190.3	1941.21	2865	33.49	62.46	45.65	74.95	51.26	80.7	115.81	185.07	134.93	205.99	72.8	112.18
ENSG00000006530.14	ENST00000355413.7,ENST00000465241.4,ENST00000473247.4,ENST00000473884.4,ENST00000492693.4,ENST00000494053.1,ENST00000494688.1,ENST00000495028.4,ENST00000496273.1,ENST00000496784.1,ENST00000629555.1	2844.83	2595.55	468	4.09	7.63	5.93	9.74	5.68	8.94	7.22	11.53	8.63	13.18	7.33	11.3
ENSG00000006534.14	ENST00000342456.9,ENST00000527514.1,ENST00000612297.3,ENST00000614849.3,ENST00000615368.3,ENST00000615463.3,ENST00000616697.1,ENST00000617288.3,ENST00000617449.3,ENST00000619675.3	2746.15	2496.86	20	0.18	0.34	0.22	0.35	0.33	0.53	0.41	0.66	0.27	0.41	0.44	0.68
ENSG00000006555.9	ENST00000371274.7,ENST00000371276.7,ENST00000448308.2,ENST00000474654.1,ENST00000488771.1	3345	3095.71	1	0.01	0.01	0	0	0	0	0	0	0	0	0	0
ENSG00000006576.15	ENST00000248550.7,ENST00000275575.10,ENST00000307305.11,ENST00000415251.5,ENST00000416283.5,ENST00000422959.5,ENST00000424760.4,ENST00000450574.4,ENST00000454592.4,ENST00000468351.1,ENST00000470215.1,ENST00000479515.1	4445.01	4195.72	2771	14.99	27.95	19.38	31.83	21.8	34.32	20.15	32.2	18.37	28.04	19.53	30.09
ENSG00000006606.7	ENST00000005180.7,ENST00000394905.2	526	277.34	2	0.16	0.31	0.09	0.14	0.1	0.15	0.19	0.3	0	0	0	0
ENSG00000006607.12	ENST00000264042.6,ENST00000373287.7,ENST00000412332.1,ENST00000413432.2,ENST00000418082.1,ENST00000422951.1,ENST00000444371.1,ENST00000445489.1,ENST00000464142.4,ENST00000467260.1,ENST00000470617.1,ENST00000471447.4,ENST00000473082.4,ENST00000473510.1,ENST00000476799.1,ENST00000478489.4,ENST00000479427.4,ENST00000485051.1,ENST00000486736.4,ENST00000491425.1,ENST00000492868.1,ENST00000496470.1,ENS…	3893.08	3643.8	1482.94	9.23	17.22	11.59	19.03	11.31	17.81	12.08	19.31	12.76	19.48	12.28	18.92
ENSG00000006611.14	ENST00000005226.10,ENST00000318024.7,ENST00000526181.1,ENST00000526313.4,ENST00000527020.4,ENST00000527551.1,ENST00000527720.4,ENST00000529563.4,ENST00000530700.1,ENST00000534556.1,ENST00000624811.1	1656.26	1406.97	44	0.71	1.32	0.55	0.9	0.37	0.58	0.5	0.81	0.45	0.68	0.48	0.74
ENSG00000006625.16	ENST00000005374.9,ENST00000275428.7,ENST00000409144.4,ENST00000409390.4,ENST00000409436.2,ENST00000426081.4,ENST00000440082.4,ENST00000447901.1	1099.08	849.79	221	5.9	11.01	8.27	13.57	8.08	12.71	9.89	15.8	10.84	16.55	11.34	17.47
ENSG00000006634.6	ENST00000265728.4,ENST00000413643.4,ENST00000430279.4,ENST00000431138.4,ENST00000486925.1,ENST00000495067.1,ENST00000498144.4,ENST00000498726.1	1469.24	1220.07	106	1.97	3.68	1.19	1.95	2.02	3.18	6.33	10.12	4.47	6.82	4.46	6.88
ENSG00000006638.10	ENST00000375190.7,ENST00000411851.3,ENST00000587717.1,ENST00000589966.1	1970.23	1721.34	37	0.49	0.91	0.6	0.98	0.67	1.05	0.12	0.2	0.07	0.11	0.36	0.56
ENSG00000006652.12	ENST00000005558.7,ENST00000403825.6,ENST00000417662.1,ENST00000421296.1,ENST00000429071.4,ENST00000432734.1,ENST00000440625.4,ENST00000443101.5,ENST00000445335.1,ENST00000462155.2,ENST00000466459.4,ENST00000470441.1,ENST00000476927.4,ENST00000486688.1,ENST00000489994.4,ENST00000535603.4,ENST00000621379.3	1669.86	1421.36	356	5.68	10.6	8.57	14.06	5.75	9.05	7.19	11.48	5.61	8.56	5.3	8.16
ENSG00000006659.11	ENST00000360675.6,ENST00000392052.6,ENST00000601802.1	672	423.24	0	0	0	0	0	0	0	0	0	0	0	0	0
ENSG00000006695.9	ENST00000261643.6,ENST00000429152.5,ENST00000580561.1,ENST00000581931.4	2568.92	2319.63	726	7.1	13.24	9.09	14.93	8.96	14.11	12.53	20.02	13.16	20.09	14.77	22.76
ENSG00000006704.9	ENST00000265755.6,ENST00000424337.5,ENST00000455841.5,ENST00000470715.1,ENST00000476977.4,ENST00000486086.1,ENST00000489094.1	2064.12	1815.59	559	6.99	13.03	8.95	14.7	8.69	13.68	11.65	18.62	7.5	11.45	7.58	11.68
ENSG00000006712.13	ENST00000221265.6,ENST00000416728.3,ENST00000595379.1,ENST00000595564.4,ENST00000595797.4,ENST00000597365.1,ENST00000598127.1,ENST00000598594.1	1911.92	1662.63	1332	18.18	33.9	21.04	34.55	20.58	32.4	34.44	55.04	37.9	57.86	30.79	47.45
ENSG00000006715.14	ENST00000265745.12,ENST00000310301.7,ENST00000395969.5,ENST00000413141.4,ENST00000414632.4,ENST00000418457.5,ENST00000439468.1,ENST00000448833.4,ENST00000457055.1,ENST00000462429.1,ENST00000466017.1,ENST00000482217.1,ENST00000485955.1,ENST00000490924.1	2099.05	1850.07	1633	20.03	37.35	22.94	37.67	27.61	43.46	25.86	41.32	23.79	36.32	20.93	32.25
ENSG00000006740.15	ENST00000262444.12,ENST00000340825.6,ENST00000379672.8,ENST00000538915.2,ENST00000544416.5,ENST00000578087.1,ENST00000578442.1,ENST00000580768.4,ENST00000581437.1,ENST00000583608.1,ENST00000584974.1,ENST00000616670.3	4209.92	3960.64	416	2.38	4.44	2.86	4.69	2.71	4.26	1.91	3.05	2.42	3.7	2.06	3.18
ENSG00000006744.17	ENST00000338034.7,ENST00000395962.5,ENST00000426905.6,ENST00000446899.4,ENST00000465825.4,ENST00000476042.1,ENST00000480891.4,ENST00000484122.4,ENST00000487229.5,ENST00000491478.4,ENST00000492559.4,ENST00000578071.1,ENST00000578104.1,ENST00000578991.4,ENST00000580504.4,ENST00000581499.5,ENST00000583371.4,ENST00000584650.4,ENST00000609101.4,ENST00000609345.1,ENST00000609757.4	2021.32	1772.12	1322	16.93	31.57	24.09	39.55	22.43	35.32	20.9	33.4	24.02	36.67	26.88	41.42
ENSG00000006747.13	ENST00000297029.8,ENST00000341757.8,ENST00000417018.1,ENST00000436854.1,ENST00000473722.4,ENST00000476649.1,ENST00000486980.4,ENST00000518849.1,ENST00000519209.4,ENST00000523729.4	2569	2319.71	3	0.03	0.05	0.04	0.07	0.04	0.07	0.19	0.31	0.34	0.52	0.23	0.35
ENSG00000006756.14	ENST00000217890.9,ENST00000381154.4,ENST00000458014.1,ENST00000481340.1,ENST00000494870.4,ENST00000495294.1,ENST00000559324.1	4464.46	4215.18	468	2.52	4.7	3.12	5.12	3.67	5.78	3.19	5.11	3.1	4.74	3.03	4.67
ENSG00000006757.10	ENST00000381042.7,ENST00000442940.1,ENST00000444736.4,ENST00000537427.4	1111.73	862.5	214	5.63	10.5	7.95	13.05	7.69	12.11	7.05	11.27	7.17	10.94	6.35	9.78
ENSG00000006788.11	ENST00000252172.7,ENST00000418404.6,ENST00000621918.1	6068	5818.71	0	0	0	0	0	0	0	0	0	0	0	0	0
ENSG00000006831.9	ENST00000357103.4,ENST00000535774.1,ENST00000537190.1,ENST00000537545.1,ENST00000540974.1,ENST00000543456.1,ENST00000544470.1	3650.24	3401.05	1348	8.99	16.77	11.86	19.47	11.28	17.76	21.08	33.69	22.66	34.6	22.47	34.63
ENSG00000006837.10	ENST00000265334.7,ENST00000518990.4,ENST00000519312.4,ENST00000520592.1,ENST00000520693.4,ENST00000521118.4,ENST00000521755.1,ENST00000522501.1,ENST00000523054.4,ENST00000523832.1	760.44	512.6	42.42	1.88	3.5	3.39	5.57	2.61	4.11	1.03	1.65	1.57	2.39	2.42	3.72
ENSG00000007001.11	ENST00000005756.4,ENST00000460456.1,ENST00000489438.1,ENST00000605860.4	1640.75	1391.46	0	0	0	0	0	0.04	0.06	0.04	0.06	0	0	0.02	0.02
ENSG00000007038.9	ENST00000005995.6,ENST00000450020.6,ENST00000570594.4,ENST00000570629.4,ENST00000571141.1,ENST00000574265.1,ENST00000574813.4,ENST00000575199.1,ENST00000575739.1,ENST00000577043.1	773	524.46	0	0	0	0	0	0	0	0	0	0	0	0	0
ENSG00000007047.13	ENST00000262891.7,ENST00000300843.7,ENST00000587566.4,ENST00000588533.4,ENST00000588621.4,ENST00000590897.1,ENST00000590909.1,ENST00000592207.4,ENST00000592762.4,ENST00000620044.3,ENST00000622871.1	2303.51	2054.27	1192	13.17	24.56	13.37	21.96	15.3	24.09	15.27	24.4	20.86	31.85	19.27	29.69
ENSG00000007062.10	ENST00000447510.5,ENST00000502501.1,ENST00000502943.1,ENST00000503884.4,ENST00000504842.4,ENST00000505450.4,ENST00000508167.4,ENST00000508322.1,ENST00000508940.1,ENST00000510224.4,ENST00000511153.4,ENST00000511270.1,ENST00000512304.2,ENST00000513108.1,ENST00000513448.4,ENST00000513946.1,ENST00000514693.4,ENST00000514967.4,ENST00000539194.4,ENST00000540805.4	3698.65	3449.36	8	0.05	0.1	0.09	0.15	0.12	0.19	0.06	0.1	0.08	0.13	0.06	0.09
ENSG00000007080.9	ENST00000445755.5,ENST00000596123.1,ENST00000597436.4,ENST00000602080.1	932.71	683.43	463	15.37	28.67	12.99	21.33	15.37	24.19	11.95	19.09	14.33	21.88	14.4	22.19
ENSG00000007129.16	ENST00000187608.12,ENST00000401445.2,ENST00000407170.5,ENST00000457737.4,ENST00000482870.5,ENST00000618577.3	1236.5	987.56	0	0	0	0	0	0	0	0	0	0.13	0.2	0	0
ENSG00000007168.11	ENST00000397193.6,ENST00000397195.8,ENST00000570400.1,ENST00000571289.1,ENST00000571495.1,ENST00000572915.5,ENST00000574213.1,ENST00000574468.1,ENST00000574816.4,ENST00000575477.4,ENST00000576586.4,ENST00000609078.1,ENST00000610190.1	5256.37	5007.09	5806	26.31	49.07	32.41	53.22	33.86	53.31	30.11	48.12	30.87	47.12	31.69	48.83
ENSG00000007171.15	ENST00000313735.9,ENST00000621962.1	3958.04	3708.75	6	0.04	0.07	0.02	0.04	0.05	0.08	0.01	0.01	0.02	0.03	0.02	0.03
ENSG00000007174.16	ENST00000262442.7,ENST00000396001.5,ENST00000454412.5,ENST00000578834.1,ENST00000579406.1,ENST00000579602.1,ENST00000579703.1,ENST00000579813.1,ENST00000579828.4,ENST00000580255.1,ENST00000581682.1,ENST00000583192.1,ENST00000584663.1,ENST00000585197.1,ENST00000608377.4	11762.4	11513.1	28	0.06	0.1	0.11	0.18	0.14	0.22	0.01	0.01	0.02	0.03	0.02	0.03
ENSG00000007202.13	ENST00000389003.6,ENST00000528896.5,ENST00000544884.4,ENST00000577261.1,ENST00000577417.4,ENST00000577580.1,ENST00000579253.1,ENST00000579924.5,ENST00000580395.1,ENST00000580882.4,ENST00000581064.1,ENST00000581267.1,ENST00000582417.1,ENST00000582901.1,ENST00000583403.4,ENST00000583860.1	2954.45	2705.57	4403.48	36.93	68.88	34.71	56.98	37.28	58.7	34.96	55.87	36.61	55.88	29.91	46.09
ENSG00000007216.13	ENST00000314669.8,ENST00000444914.6,ENST00000459818.2,ENST00000541739.5,ENST00000545060.2,ENST00000577903.4,ENST00000579281.4	2153.57	1904.28	0	0	0	0	0	0	0	0	0	0	0	0	0
ENSG00000007237.17	ENST00000323816.7,ENST00000396115.5,ENST00000432992.5,ENST00000437099.5,ENST00000542249.4,ENST00000578456.1,ENST00000578599.4,ENST00000578655.1,ENST00000579140.4,ENST00000579158.4,ENST00000580043.1,ENST00000580811.4,ENST00000580865.4,ENST00000581112.4,ENST00000581871.4,ENST00000583882.4,ENST00000584146.5,ENST00000584389.4,ENST00000585266.4	6809.83	6560.56	5178	17.91	33.4	21.77	35.74	23.44	36.9	8.76	13.99	11.51	17.57	11.34	17.47
ENSG00000007255.9	ENST00000006275.7,ENST00000585934.1,ENST00000587818.1,ENST00000588062.4,ENST00000592647.1	659.12	410.18	37	2.05	3.82	2.78	4.57	2.35	3.7	2.37	3.8	2.3	3.51	1.88	2.9
ENSG00000007264.12	ENST00000310132.9,ENST00000395040.5,ENST00000395045.5,ENST00000585778.4,ENST00000587180.1,ENST00000588983.4,ENST00000590028.4,ENST00000590493.4,ENST00000590821.1,ENST00000590849.1,ENST00000590980.1,ENST00000591059.1,ENST00000592300.1,ENST00000592612.1,ENST00000612526.3,ENST00000619596.3	1558.94	1309.66	3	0.05	0.1	0	0	0.06	0.09	0	0	0.16	0.25	0.06	0.09
ENSG00000007306.13	ENST00000006724.6,ENST00000401731.4,ENST00000599715.1,ENST00000602225.1	1197.75	948.75	0	0	0	0	0	0	0	0	0	0	0	0	0
ENSG00000007312.11	ENST00000006750.6,ENST00000349817.2,ENST00000392795.6,ENST00000558969.1,ENST00000559358.1,ENST00000583260.1	842.67	594.89	0	0	0	0	0	0.03	0.05	0.03	0.05	0	0	0	0
ENSG00000007314.10	ENST00000435607.3,ENST00000578147.4,ENST00000581514.1,ENST00000584310.1	4188.5	3939.36	0	0	0	0	0	0	0	0.01	0.02	0.01	0.01	0.01	0.02
ENSG00000007341.17	ENST00000343210.10,ENST00000358039.7,ENST00000360743.7,ENST00000361846.6,ENST00000369664.1,ENST00000369666.4,ENST00000369669.4,ENST00000418497.4,ENST00000459630.4,ENST00000463235.4,ENST00000466360.4,ENST00000467335.4,ENST00000470519.4,ENST00000470683.1,ENST00000473206.4,ENST00000477332.4,ENST00000477682.1,ENST00000479436.4,ENST00000480988.4,ENST00000485753.4,ENST00000490067.4,ENST00000490715.4,EN…	2227.96	1978.73	435.45	4.99	9.31	8.8	14.44	9.93	15.64	6.65	10.63	5.37	8.19	7.51	11.57
ENSG00000007350.15	ENST00000369912.2,ENST00000369915.6,ENST00000426203.4,ENST00000426989.4,ENST00000439635.4,ENST00000463884.1,ENST00000465168.1,ENST00000482044.1	1059.5	810.74	0	0	0	0	0	0	0	0	0	0	0	0	0
ENSG00000007372.19	ENST00000241001.11,ENST00000379107.5,ENST00000379109.5,ENST00000379111.5,ENST00000379115.7,ENST00000379123.8,ENST00000379129.5,ENST00000379132.6,ENST00000419022.4,ENST00000423822.5,ENST00000438681.4,ENST00000455099.4,ENST00000464174.4,ENST00000470027.5,ENST00000471303.4,ENST00000474783.1,ENST00000481563.4,ENST00000494377.5,ENST00000524853.4,ENST00000525535.1,ENST00000527769.4,ENST00000530373.4,EN…	3740.5	3491.22	63	0.41	0.76	0.86	1.41	1.04	1.63	0.44	0.7	0.53	0.81	0.47	0.73
ENSG00000007376.6	ENST00000007264.5,ENST00000561734.4,ENST00000562070.1,ENST00000563560.1,ENST00000565377.1,ENST00000565503.4,ENST00000565809.4,ENST00000567114.4,ENST00000567283.4,ENST00000569601.4	1853.21	1603.92	294	4.16	7.76	4.1	6.74	4.56	7.17	6.38	10.2	5.23	7.99	5.63	8.67
ENSG00000007384.14	ENST00000262316.9,ENST00000417043.4,ENST00000419764.1,ENST00000428730.4,ENST00000448893.1,ENST00000450643.4,ENST00000472390.1,ENST00000482904.1,ENST00000486045.1,ENST00000487201.1,ENST00000493647.1	2365.47	2116.23	383	4.11	7.66	4.35	7.14	4.46	7.01	2.17	3.46	2.44	3.73	2.55	3.92
ENSG00000007392.15	ENST00000293872.11,ENST00000337351.7,ENST00000397780.4,ENST00000397783.4,ENST00000418978.4,ENST00000419516.4,ENST00000426094.4,ENST00000428363.1,ENST00000429378.4,ENST00000430864.4,ENST00000442701.1,ENST00000443357.4,ENST00000464711.4,ENST00000467552.1,ENST00000468732.4,ENST00000469109.1,ENST00000490762.4,ENST00000494366.4,ENST00000494545.1,ENST00000495349.4,ENST00000629543.1	1673	1423.76	309	4.92	9.18	6.34	10.41	5.59	8.81	8.18	13.08	7.99	12.2	8.66	13.34
ENSG00000007402.10	ENST00000266039.6,ENST00000360963.6,ENST00000423994.5,ENST00000424201.5,ENST00000429770.4,ENST00000479441.1,ENST00000483620.1,ENST00000487413.1	4687.67	4438.38	227	1.16	2.16	1.36	2.23	1.24	1.95	0.35	0.55	0.56	0.86	0.49	0.76
ENSG00000007516.12	ENST00000324385.8,ENST00000397488.5,ENST00000421665.5,ENST00000426824.6,ENST00000561602.1,ENST00000561793.1,ENST00000562208.4,ENST00000564213.1,ENST00000565665.4,ENST00000566162.1,ENST00000566389.1,ENST00000567203.1,ENST00000567825.2,ENST00000568198.1,ENST00000568887.4,ENST00000628027.1	2151.46	1902.52	75.15	0.9	1.67	0.73	1.19	0.43	0.68	0.98	1.56	1.02	1.56	0.48	0.74
ENSG00000007520.3	ENST00000007390.2,ENST00000566296.1	1233.53	984.25	306.85	7.07	13.19	6.61	10.85	6.5	10.23	7.14	11.41	7.41	11.32	8.44	13
ENSG00000007541.13	ENST00000026218.8,ENST00000293874.2,ENST00000321878.8,ENST00000409439.5,ENST00000409527.5,ENST00000420990.5,ENST00000422307.4,ENST00000439574.1,ENST00000443147.4,ENST00000470411.2,ENST00000476438.1,ENST00000480424.5,ENST00000537901.1,ENST00000540241.1,ENST00000540548.1,ENST00000544860.1	2784.35	2535.1	513	4.59	8.56	5.64	9.26	5.12	8.07	8.02	12.81	8.2	12.51	7.42	11.44
ENSG00000007545.14	ENST00000293925.8,ENST00000397412.6,ENST00000415022.1,ENST00000466562.4,ENST00000467286.1,ENST00000468839.1,ENST00000492778.4,ENST00000498594.4	5526.55	5277.38	944.36	4.06	7.57	4.82	7.91	6.33	9.96	6.84	10.93	7.1	10.83	9.18	14.15
ENSG00000007866.17	ENST00000338863.10,ENST00000402886.6,ENST00000433586.1	1948.95	1699.7	2381	31.79	59.28	41.07	67.43	39.76	62.6	37.59	60.07	40.26	61.46	43.24	66.64
ENSG00000007908.14	ENST00000333360.10,ENST00000367774.1,ENST00000367775.4,ENST00000367776.4,ENST00000367777.4,ENST00000461085.1,ENST00000609271.1	3576	3326.71	3	0.02	0.04	0.09	0.15	0.09	0.14	0.02	0.03	0	0	0.02	0.03
ENSG00000007923.14	ENST00000294401.10,ENST00000377577.8,ENST00000426784.1,ENST00000451196.4,ENST00000460594.4,ENST00000465508.4,ENST00000465911.1,ENST00000469318.4,ENST00000472414.1,ENST00000473993.4,ENST00000485073.4	2913.46	2664.19	1027.6	8.75	16.32	9.2	15.11	10.67	16.81	9.26	14.79	11.1	16.94	11.98	18.46
ENSG00000007933.11	ENST00000367755.7,ENST00000472784.4,ENST00000478457.1,ENST00000479749.1,ENST00000530212.4,ENST00000534514.1	1012.5	763.26	0	0	0	0	0	0	0	0	0	0	0	0	0
ENSG00000007944.13	ENST00000349606.4,ENST00000356840.6	2388.2	2138.91	676	7.17	13.37	8.82	14.48	10.6	16.68	11.64	18.6	14.27	21.78	7.82	12.05
ENSG00000007952.16	ENST00000217885.5,ENST00000372960.7,ENST00000372964.4,ENST00000372966.6,ENST00000427768.4	1992.05	1742.78	66	0.86	1.6	0.63	1.03	1.2	1.89	0.06	0.1	0.13	0.2	0.07	0.1
ENSG00000007968.6	ENST00000361729.2,ENST00000487237.1	5191	4941.71	17	0.08	0.15	0.03	0.05	0.05	0.07	1.05	1.68	1	1.53	1.11	1.71
ENSG00000008018.8	ENST00000262193.6,ENST00000462957.1	940.27	690.99	750	24.63	45.93	31.75	52.13	32.31	50.88	36.56	58.42	38.53	58.83	42.48	65.45
ENSG00000008056.11	ENST00000295987.10,ENST00000340666.4	3183.93	2934.65	389	3.01	5.61	3.93	6.46	3.76	5.92	2.98	4.76	3.97	6.06	3.67	5.65
ENSG00000008083.12	ENST00000341776.5,ENST00000397311.4,ENST00000474854.1	5699.11	5449.82	455	1.89	3.53	2.35	3.85	2.6	4.09	3.21	5.13	3.41	5.2	2.93	4.52
ENSG00000008086.9	ENST00000379989.5,ENST00000379996.6,ENST00000463994.3,ENST00000623364.2,ENST00000623535.1,ENST00000623610.1,ENST00000624700.2,ENST00000624953.1	8057.16	7807.87	743	2.16	4.03	2.36	3.88	2.94	4.62	2.5	3.99	2.2	3.36	2.84	4.38
ENSG00000008118.8	ENST00000009105.4,ENST00000361322.2,ENST00000423146.4,ENST00000494990.1	2020.46	1771.24	5	0.06	0.12	0.07	0.11	0.05	0.07	0.41	0.66	0.62	0.95	0.22	0.34
ENSG00000008128.21	ENST00000356200.6,ENST00000356937.6,ENST00000357760.5,ENST00000358779.8,ENST00000378633.4,ENST00000378638.5,ENST00000401096.2,ENST00000404249.6,ENST00000460465.4,ENST00000463652.4,ENST00000464748.1,ENST00000468397.1,ENST00000468800.4,ENST00000474916.1,ENST00000478901.1,ENST00000479362.1,ENST00000487462.1,ENST00000489300.1,ENST00000491311.1,ENST00000492390.4,ENST00000495016.4,ENST00000498810.1,ENS…	1814.06	1564.97	108.28	1.57	2.93	1.99	3.27	2.11	3.33	2.5	4	2.45	3.74	3.49	5.37
ENSG00000008130.14	ENST00000341426.8,ENST00000341991.6,ENST00000342348.8,ENST00000378625.4,ENST00000460602.4,ENST00000464373.1,ENST00000469045.4,ENST00000477235.4,ENST00000480499.4,ENST00000480542.1,ENST00000489538.1,ENST00000492768.4,ENST00000492845.5,ENST00000497186.4,ENST00000497615.1,ENST00000497747.4,ENST00000498806.1	2306.37	2058.23	1050	11.58	21.59	14.33	23.53	11.92	18.77	15.03	24.02	14.59	22.27	15.8	24.34
ENSG00000008196.11	ENST00000344788.6,ENST00000393655.3,ENST00000489228.1	2468.33	2219.05	0	0	0	0.03	0.06	0.01	0.02	0	0	0	0	0	0
ENSG00000008197.4	ENST00000008391.3,ENST00000492804.1	1204	954.73	0	0	0	0	0	0	0	0	0	0	0	0	0
ENSG00000008226.18	ENST00000308059.9,ENST00000346219.6,ENST00000440294.5,ENST00000447130.1,ENST00000469151.1,ENST00000477260.1,ENST00000478428.1	3772.46	3523.17	12.82	0.08	0.15	0.01	0.01	0.16	0.25	0.14	0.23	0.32	0.49	0.1	0.15
ENSG00000008256.14	ENST00000350796.6,ENST00000396741.3,ENST00000461891.4,ENST00000465320.1,ENST00000466543.1,ENST00000478541.1,ENST00000481329.1,ENST00000482460.1,ENST00000488964.4,ENST00000491641.4,ENST00000495176.4	4290.41	4041.14	1146	6.43	12	7	11.5	8.38	13.19	5.04	8.05	5.52	8.43	5.09	7.84
ENSG00000008277.13	ENST00000265727.10,ENST00000398201.7,ENST00000398203.6,ENST00000398204.7,ENST00000398209.6,ENST00000412441.4,ENST00000413139.1,ENST00000426930.4,ENST00000439864.4,ENST00000476330.1,ENST00000478920.1	6282.18	6033.02	68	0.26	0.48	0.33	0.54	0.48	0.76	0.45	0.72	0.79	1.21	0.58	0.89
ENSG00000008282.6	ENST00000011473.5,ENST00000455385.5,ENST00000460770.1,ENST00000464029.4,ENST00000470347.1,ENST00000483448.1	2119.53	1870.24	2388	28.97	54.03	37.99	62.38	40.73	64.12	38.94	62.22	41.32	63.08	38.47	59.28
ENSG00000008283.14	ENST00000360793.6,ENST00000392975.5,ENST00000392976.4,ENST00000448884.5,ENST00000542042.4,ENST00000577368.4,ENST00000577989.4,ENST00000578016.1,ENST00000578072.1,ENST00000580592.1,ENST00000580691.4,ENST00000581163.4,ENST00000581573.4,ENST00000582034.4,ENST00000582143.1,ENST00000582297.4,ENST00000582997.4,ENST00000583478.1,ENST00000584031.4,ENST00000584291.4,ENST00000585153.1	2253.53	2004.42	126	1.43	2.66	1.88	3.08	1.68	2.64	1.19	1.91	1.22	1.86	1.22	1.88
ENSG00000008294.19	ENST00000262013.10,ENST00000357122.7,ENST00000502329.1,ENST00000505173.4,ENST00000505279.4,ENST00000506483.1,ENST00000506500.1,ENST00000509724.1,ENST00000510283.4,ENST00000510855.1,ENST00000511312.2,ENST00000511795.1,ENST00000511987.4,ENST00000513547.4,ENST00000513746.5,ENST00000513827.4,ENST00000513906.1,ENST00000514205.1,ENST00000514613.4,ENST00000515685.1,ENST00000576492.1,ENST00000618113.3	5484.44	5235.15	2689	11.66	21.74	13.11	21.53	13.94	21.94	15.02	24	14.17	21.63	14.07	21.68
ENSG00000008300.13	ENST00000164024.4,ENST00000461362.4,ENST00000470999.1,ENST00000498057.1	11349.5	11100.2	327	0.67	1.25	0.68	1.12	0.75	1.19	0.24	0.39	0.24	0.36	0.24	0.37
ENSG00000008311.13	ENST00000358954.5,ENST00000393376.4,ENST00000417368.5,ENST00000426162.1,ENST00000431170.4,ENST00000460376.4,ENST00000473553.4	3107.06	2857.77	600	4.76	8.88	7.18	11.79	6.43	10.12	23.57	37.66	21.86	33.37	22.87	35.25
ENSG00000008323.14	ENST00000011684.10,ENST00000304581.8,ENST00000396988.6,ENST00000449001.5,ENST00000535616.1,ENST00000536531.4,ENST00000538208.1,ENST00000543000.1,ENST00000544743.1	2881	2631.71	7	0.06	0.11	0.05	0.07	0.05	0.08	0.02	0.03	0.02	0.04	0.1	0.16
ENSG00000008324.9	ENST00000011691.4,ENST00000447630.4,ENST00000474941.1	815	565.72	83	3.33	6.21	4.96	8.14	4.42	6.96	6.41	10.25	6.83	10.43	6.94	10.69
ENSG00000008382.14	ENST00000262966.11,ENST00000359935.7,ENST00000594162.1,ENST00000594716.4,ENST00000596722.4,ENST00000597036.4,ENST00000599840.4,ENST00000601877.1	1588.65	1339.36	115	1.95	3.63	2.51	4.12	3.03	4.76	3.19	5.1	3.95	6.03	3.67	5.65
ENSG00000008394.11	ENST00000010404.5,ENST00000359720.3,ENST00000396207.1,ENST00000396209.4,ENST00000396210.6,ENST00000534835.4,ENST00000535309.4,ENST00000535624.1,ENST00000536371.4,ENST00000537878.4,ENST00000538857.1,ENST00000538885.4,ENST00000539036.4,ENST00000539708.4,ENST00000540056.4,ENST00000540126.4,ENST00000542256.4,ENST00000543076.4,ENST00000624056.1	904.08	654.84	976	33.82	63.07	42.67	70.06	47.42	74.66	28.83	46.08	26.87	41.02	32.34	49.83
ENSG00000008405.10	ENST00000008527.8,ENST00000546722.1,ENST00000549356.1,ENST00000550633.1,ENST00000552790.4	2771.54	2522.43	491	4.42	8.24	5.21	8.56	5.1	8.03	4.6	7.36	4.1	6.27	6.17	9.51
ENSG00000008438.4	ENST00000008938.4	720	470.74	0	0	0	0	0	0	0	0	0	0	0	0	0
ENSG00000008441.15	ENST00000358552.6,ENST00000360105.7,ENST00000397661.5,ENST00000585382.4,ENST00000585575.4,ENST00000586797.4,ENST00000586873.1,ENST00000587260.1,ENST00000587760.4,ENST00000588228.4,ENST00000588680.1,ENST00000590027.1,ENST00000591028.1,ENST00000592199.4	3991.67	3742.38	2107	12.78	23.83	12.91	21.2	15.41	24.27	4.34	6.94	7.01	10.71	5.26	8.11
ENSG00000008513.13	ENST00000399640.3,ENST00000517668.4,ENST00000518298.4,ENST00000519435.4,ENST00000519924.4,ENST00000520020.4,ENST00000521180.4,ENST00000521627.1,ENST00000522204.1,ENST00000522285.1,ENST00000522652.4,ENST00000522873.1,ENST00000523634.1,ENST00000523854.4,ENST00000523855.1	5897.17	5647.95	3946	15.85	29.57	18.34	30.11	19.69	31	18.65	29.81	20.16	30.78	17.76	27.37
ENSG00000008516.15	ENST00000336577.7,ENST00000570755.1,ENST00000575441.1,ENST00000612971.1	1515	1265.72	0	0	0	0.11	0.18	0	0	0.11	0.18	0.07	0.1	0.02	0.03
ENSG00000008517.15	ENST00000008180.12,ENST00000325568.8,ENST00000382213.6,ENST00000396887.6,ENST00000396890.5,ENST00000440815.6,ENST00000444393.6,ENST00000525003.1,ENST00000525228.4,ENST00000525377.5,ENST00000525643.5,ENST00000526464.5,ENST00000528163.5,ENST00000528652.2,ENST00000529550.4,ENST00000529699.4,ENST00000530538.5,ENST00000530890.4,ENST00000531965.4,ENST00000532086.1,ENST00000532247.4,ENST00000533097.5,EN…	873.98	624.7	368	13.37	24.93	15.04	24.7	19.16	30.16	1.46	2.33	1.37	2.08	2.48	3.83
ENSG00000008710.16	ENST00000262304.7,ENST00000415938.6,ENST00000423118.4,ENST00000468674.4,ENST00000469241.2,ENST00000469851.1,ENST00000471603.5,ENST00000472577.1,ENST00000472659.1,ENST00000473780.2,ENST00000474088.1,ENST00000475889.1,ENST00000480227.4,ENST00000483024.1,ENST00000483558.4,ENST00000483731.4,ENST00000483814.1,ENST00000485120.1,ENST00000486339.5,ENST00000487932.4,ENST00000488185.2,ENST00000496574.5,ENS…	5270.35	5021.72	5898.14	26.65	49.7	26.87	44.11	28.51	44.88	23.22	37.11	20.82	31.79	20.52	31.61
ENSG00000008735.13	ENST00000008876.7,ENST00000329492.5	4264.19	4014.9	47	0.27	0.5	0.39	0.64	0.44	0.7	0.21	0.33	0.28	0.43	0.16	0.25
ENSG00000008838.16	ENST00000356271.6,ENST00000394126.4,ENST00000394127.5,ENST00000394128.5,ENST00000422942.5,ENST00000428757.5,ENST00000470126.1,ENST00000479829.4,ENST00000491466.4,ENST00000492176.2,ENST00000495586.1,ENST00000501516.6,ENST00000535071.5,ENST00000535508.5,ENST00000537674.5,ENST00000543759.5,ENST00000577488.4,ENST00000578161.2,ENST00000578901.1,ENST00000579364.1,ENST00000580008.4,ENST00000580302.1,ENS…	1996.54	1747.42	1656	21.5	40.1	19.91	32.68	19.95	31.41	29.35	46.9	20.35	31.07	24.28	37.41
ENSG00000008853.15	ENST00000251822.6,ENST00000517528.1,ENST00000518534.1,ENST00000519210.1,ENST00000519685.4,ENST00000522948.4,ENST00000523918.1,ENST00000524077.4	4070.17	3820.99	1886.6	11.2	20.89	18.22	29.91	17.1	26.92	20.35	32.52	23.52	35.9	25.34	39.04
ENSG00000008869.10	ENST00000233099.5,ENST00000425467.4,ENST00000467978.1,ENST00000471051.1,ENST00000478810.1	6600.22	6350.94	1303	4.66	8.68	5.6	9.19	5.85	9.2	5.66	9.04	6.43	9.81	6.59	10.16
ENSG00000008952.15	ENST00000337002.7,ENST00000460513.4,ENST00000461933.1,ENST00000469515.5,ENST00000469890.1,ENST00000470355.1,ENST00000480708.4,ENST00000481435.4,ENST00000487736.4,ENST00000497277.1	3800.02	3553.39	1740	11.11	20.72	9.03	14.82	14.03	22.09	8.48	13.55	10.01	15.28	8.51	13.11
ENSG00000008988.8	ENST00000009589.6,ENST00000518875.4,ENST00000519369.1,ENST00000519606.4,ENST00000519807.4,ENST00000520490.1,ENST00000520627.1,ENST00000521262.4,ENST00000521289.4,ENST00000523936.4,ENST00000524349.4,ENST00000618656.1	659.4	410.22	4936	273.03	509.19	325.68	534.7	344.31	542.09	589.38	941.89	622.62	950.5	545.55	840.64
ENSG00000009307.14	ENST00000261443.8,ENST00000339438.9,ENST00000358528.7,ENST00000369530.4,ENST00000438362.5,ENST00000483030.1,ENST00000483407.1,ENST00000524652.1,ENST00000525132.1,ENST00000525878.4,ENST00000525970.4,ENST00000529046.4,ENST00000530784.1,ENST00000530886.4,ENST00000533818.4,ENST00000534389.2,ENST00000534699.4,ENST00000610726.3	3779.91	3530.63	12562	80.74	150.57	101.79	167.12	111.31	175.26	128.12	204.75	132.63	202.47	118.84	183.13
ENSG00000009335.16	ENST00000348165.8,ENST00000389103.4,ENST00000430750.1,ENST00000469336.1,ENST00000470408.4,ENST00000474153.1,ENST00000494532.1,ENST00000497368.1,ENST00000611269.3	5063.04	4813.78	2829	13.34	24.87	15.06	24.73	15.65	24.64	18.61	29.74	18.85	28.77	17.54	27.02
ENSG00000009413.14	ENST00000358835.6,ENST00000368802.6,ENST00000368805.4,ENST00000413831.1,ENST00000422377.4,ENST00000434009.4,ENST00000435970.4,ENST00000460981.1,ENST00000462119.4,ENST00000467500.1,ENST00000470871.1,ENST00000492520.1,ENST00000494858.1,ENST00000619481.1	8310.2	8065.17	2553.53	7.18	13.4	7.3	11.99	9.6	15.12	8.78	14.03	9.53	14.55	9.97	15.36
ENSG00000009694.12	ENST00000371130.6,ENST00000422452.2,ENST00000461429.1	12875	12625.7	11	0.02	0.04	0.03	0.04	0.04	0.06	0.05	0.08	0.15	0.22	0.04	0.07
ENSG00000009709.10	ENST00000375375.6,ENST00000400661.3,ENST00000420770.5	3166	2916.71	0	0	0	0	0	0	0	0	0	0	0	0	0
ENSG00000009724.15	ENST00000400897.6,ENST00000400898.3,ENST00000478645.1,ENST00000480221.1	2439	2189.71	13	0.13	0.25	0.28	0.46	0.24	0.37	0.76	1.22	0.45	0.69	1	1.53
ENSG00000009765.13	ENST00000229447.8,ENST00000344419.6,ENST00000367335.6,ENST00000392255.6,ENST00000392256.5,ENST00000422583.2,ENST00000425615.3,ENST00000500320.6,ENST00000546121.1	2567.11	2318.36	0	0	0	0	0	0	0	0	0	0	0	0	0
ENSG00000009780.14	ENST00000010299.9,ENST00000234549.10,ENST00000373949.4,ENST00000373954.9,ENST00000419687.5,ENST00000446647.1,ENST00000530324.4	2443.32	2194.03	154	1.59	2.97	2.27	3.72	1.75	2.75	3.35	5.36	3.34	5.1	3.07	4.74
ENSG00000009790.13	ENST00000367023.4,ENST00000367024.4,ENST00000367025.6,ENST00000367026.6,ENST00000400959.6,ENST00000460314.1,ENST00000467830.1,ENST00000468672.4,ENST00000471368.1,ENST00000474496.4,ENST00000476050.4,ENST00000477431.1,ENST00000478359.4,ENST00000479796.4,ENST00000487271.4,ENST00000488702.1	3066.11	2816.82	5.56	0.04	0.08	0.01	0.01	0.04	0.07	0.15	0.24	0.07	0.11	0.08	0.12
ENSG00000009830.10	ENST00000261534.7,ENST00000452340.6,ENST00000553863.4,ENST00000553880.4,ENST00000554564.1,ENST00000554767.4,ENST00000554884.4,ENST00000554948.1,ENST00000555134.1,ENST00000555675.4,ENST00000555710.1,ENST00000555788.4,ENST00000556171.1,ENST00000556326.4,ENST00000556394.1,ENST00000556404.1,ENST00000556446.1,ENST00000556851.1,ENST00000556880.4,ENST00000557289.1,ENST00000557525.1,ENST00000557675.4,ENS…	2501.08	2251.95	641	6.46	12.05	7.19	11.8	10.38	16.34	9.67	15.46	11.28	17.21	11.23	17.31
ENSG00000009844.14	ENST00000367621.1,ENST00000367630.7,ENST00000452973.5,ENST00000491881.1,ENST00000620996.3	1720.73	1471.44	1514	23.35	43.54	28.28	46.43	30.62	48.22	34.61	55.32	35.55	54.28	32	49.31
ENSG00000009950.14	ENST00000313375.6,ENST00000345114.8,ENST00000354613.4,ENST00000414749.5,ENST00000429400.5,ENST00000434326.4,ENST00000453275.1,ENST00000456640.1,ENST00000467221.1,ENST00000476404.4,ENST00000488212.1	2167.82	1918.59	0	0	0	0.05	0.09	0.05	0.08	0	0	0	0	0.02	0.03
ENSG00000009954.9	ENST00000339594.7,ENST00000404251.1,ENST00000466844.1	5795.85	5546.56	3159	12.92	24.1	15.03	24.68	16.16	25.44	19.3	30.84	19.82	30.26	18.45	28.43
ENSG00000010017.12	ENST00000011619.5,ENST00000469916.1	2262.18	2012.91	1582.84	17.84	33.28	21.64	35.53	21.09	33.2	25.28	40.41	30.91	47.18	27.9	42.99
ENSG00000010030.12	ENST00000339796.8,ENST00000340181.7,ENST00000373737.7,ENST00000373738.3,ENST00000538992.3,ENST00000615781.3,ENST00000620358.3,ENST00000627426.1	1285	1035.71	2	0.04	0.08	0.09	0.15	0.23	0.36	0	0	0	0	0	0
ENSG00000010072.14	ENST00000008440.9,ENST00000295050.10,ENST00000366644.3,ENST00000391858.7,ENST00000469904.1,ENST00000492437.1	2862.65	2613.39	340.61	2.96	5.52	3.6	5.91	3.68	5.8	3.06	4.88	3.02	4.61	3	4.63
ENSG00000010165.18	ENST00000361735.3,ENST00000362019.6,ENST00000367737.8,ENST00000466643.1,ENST00000476386.1,ENST00000478330.1,ENST00000485629.1	1758.06	1509.87	536	8.06	15.02	7.38	12.11	8.51	13.4	7.91	12.64	6.22	9.5	7.15	11.01
ENSG00000010219.12	ENST00000010132.6,ENST00000536137.1,ENST00000536157.4,ENST00000536645.1,ENST00000537719.4,ENST00000538520.4,ENST00000539309.4,ENST00000539490.1,ENST00000539701.4,ENST00000540644.1,ENST00000540757.5,ENST00000541024.1,ENST00000542905.1,ENST00000543431.4,ENST00000544050.1,ENST00000544671.1,ENST00000545571.4	656.11	407.35	193	10.75	20.05	15.58	25.58	13.04	20.53	17.09	27.31	23.09	35.25	16	24.65
ENSG00000010244.15	ENST00000321233.9,ENST00000342555.9,ENST00000394670.7,ENST00000394673.5,ENST00000394679.8,ENST00000577324.1,ENST00000577908.4,ENST00000578918.1,ENST00000579416.1,ENST00000579634.4,ENST00000579810.2,ENST00000580759.4,ENST00000581531.4,ENST00000582165.1,ENST00000582705.1,ENST00000584416.1,ENST00000584696.1	2167.05	1917.95	3096	36.63	68.31	41.93	68.84	42.71	67.24	64.67	103.35	61.64	94.09	56	86.29
ENSG00000010256.9	ENST00000203407.5,ENST00000412343.4,ENST00000415995.4,ENST00000460105.1,ENST00000463708.1,ENST00000467690.4,ENST00000471189.4,ENST00000472438.4,ENST00000480561.4,ENST00000493806.1	1072.57	823.91	3231	88.98	165.95	115.68	189.92	121.72	191.64	149.46	238.86	146.44	223.56	182.49	281.2
ENSG00000010270.12	ENST00000009041.10,ENST00000396013.4,ENST00000429075.1,ENST00000434197.4,ENST00000440144.4,ENST00000453225.4,ENST00000471550.1	1517.03	1267.74	867	15.52	28.94	18.53	30.43	18.32	28.84	22.3	35.64	23.15	35.35	21.65	33.37
ENSG00000010278.10	ENST00000009180.7,ENST00000382515.5,ENST00000382518.4,ENST00000382519.7,ENST00000481267.4,ENST00000536586.4,ENST00000538418.1,ENST00000538834.4,ENST00000540891.1,ENST00000543916.4,ENST00000546073.4,ENST00000610354.3,ENST00000617871.3	1144.6	895.31	260	6.59	12.29	6.96	11.43	8.9	14.02	2.96	4.73	2.12	3.24	2.59	3.98
ENSG00000010282.13	ENST00000310417.8,ENST00000416756.4,ENST00000417472.4,ENST00000426666.4,ENST00000441594.4,ENST00000442469.1,ENST00000455195.4,ENST00000457462.4,ENST00000466007.1,ENST00000480939.1,ENST00000490003.4,ENST00000497000.1	1707.7	1458.41	186	2.89	5.4	3.75	6.15	3.46	5.44	4.86	7.77	5.54	8.46	5.98	9.22
ENSG00000010292.11	ENST00000315579.8,ENST00000382457.7,ENST00000535804.1,ENST00000536090.1,ENST00000536538.1,ENST00000538600.1,ENST00000539084.4,ENST00000539714.4,ENST00000539885.1,ENST00000541399.1,ENST00000542472.1,ENST00000542492.1,ENST00000545732.1	4375.26	4126.1	946.88	5.21	9.71	6.13	10.07	6.96	10.97	20.25	32.36	15.3	23.36	15.43	23.78
ENSG00000010295.18	ENST00000336604.7,ENST00000356896.7,ENST00000396830.2,ENST00000396840.5,ENST00000436152.5,ENST00000465801.4,ENST00000471408.4,ENST00000472558.5,ENST00000487279.5,ENST00000488007.4,ENST00000615885.3,ENST00000619571.3	2601.36	2352.07	219	2.11	3.94	2.75	4.51	2.36	3.71	2.01	3.21	1.95	2.98	2.74	4.22
ENSG00000010310.7	ENST00000263281.6,ENST00000304207.11,ENST00000585889.1,ENST00000588816.1,ENST00000590918.4,ENST00000591224.1,ENST00000591322.1,ENST00000593127.1	822.02	573.02	10	0.4	0.74	0.45	0.73	0.26	0.41	0.38	0.61	0.23	0.35	1.09	1.69
ENSG00000010318.18	ENST00000327906.6,ENST00000347025.5,ENST00000459935.1,ENST00000461861.4,ENST00000465863.1,ENST00000472337.4,ENST00000473145.4,ENST00000482327.4,ENST00000498509.2,ENST00000614886.3,ENST00000615126.1,ENST00000620464.3	1203.91	954.74	56	1.33	2.48	1.8	2.96	1.38	2.17	2.82	4.5	2.73	4.17	2.89	4.46
ENSG00000010319.5	ENST00000231721.5,ENST00000465657.1,ENST00000475739.1	3652.09	3402.84	58	0.39	0.72	0.34	0.55	0.26	0.41	0.26	0.41	0.13	0.2	0.18	0.28
ENSG00000010322.14	ENST00000345716.7,ENST00000420808.2,ENST00000460759.1,ENST00000464280.4,ENST00000467594.1,ENST00000474188.1,ENST00000479054.4,ENST00000481211.1,ENST00000485765.4,ENST00000488157.4,ENST00000488243.1,ENST00000488380.4,ENST00000489895.4,ENST00000490425.1	4946.26	4696.98	5158	24.92	46.47	28.71	47.13	28.28	44.53	32.99	52.72	35.32	53.92	33.9	52.23
ENSG00000010327.9	ENST00000321725.9,ENST00000461325.1,ENST00000462681.1,ENST00000462741.4,ENST00000469989.1,ENST00000479355.1,ENST00000481607.1,ENST00000481626.4,ENST00000484850.1	6831.22	6582.02	82	0.28	0.53	0.26	0.43	0.52	0.82	0.43	0.7	0.15	0.22	0.46	0.7
ENSG00000010361.12	ENST00000313777.7,ENST00000377092.7,ENST00000525130.4,ENST00000525370.4,ENST00000525800.4,ENST00000526435.1,ENST00000526575.1,ENST00000527111.2,ENST00000527585.4,ENST00000527973.1,ENST00000528043.4,ENST00000528094.4,ENST00000529302.1,ENST00000529634.2,ENST00000531017.4,ENST00000533418.4,ENST00000534008.4,ENST00000534138.1	1189.22	939.97	145.56	3.51	6.55	4.73	7.77	4.45	7.01	6.32	10.1	5.88	8.98	8.06	12.42
ENSG00000010379.14	ENST00000343164.7,ENST00000436453.1,ENST00000445055.5,ENST00000534887.1,ENST00000536842.4,ENST00000539260.1,ENST00000539668.1,ENST00000542272.4,ENST00000542379.1,ENST00000542947.1,ENST00000543722.1,ENST00000546319.4	1130.04	880.82	9	0.23	0.43	0.56	0.92	0.27	0.42	0.28	0.45	0.04	0.06	0.26	0.4
ENSG00000010404.16	ENST00000340855.9,ENST00000370441.7,ENST00000428056.5,ENST00000464251.4,ENST00000466019.1,ENST00000466323.4,ENST00000490775.4,ENST00000521702.1	4635.62	4386.33	1979.73	10.24	19.1	13.96	22.93	13.73	21.62	10.26	16.4	11.9	18.16	10.96	16.89
ENSG00000010438.15	ENST00000342836.7,ENST00000361005.8,ENST00000379405.3,ENST00000429677.6,ENST00000457896.4,ENST00000468152.2,ENST00000477653.2,ENST00000495682.1	623	373.84	1	0.06	0.11	0	0	0	0	0.05	0.08	0.07	0.11	0	0
ENSG00000010539.10	ENST00000396868.6,ENST00000396870.7,ENST00000396871.7,ENST00000414144.5,ENST00000431561.6,ENST00000575285.1,ENST00000575617.1,ENST00000575630.1,ENST00000575948.1,ENST00000577015.1	2816.91	2567.62	211	1.86	3.48	1.99	3.27	2.02	3.19	2.5	3.99	2.92	4.46	2.71	4.17
ENSG00000010610.8	ENST00000011653.7,ENST00000437800.5,ENST00000535466.4,ENST00000535707.4,ENST00000536563.1,ENST00000536590.1,ENST00000536610.4,ENST00000538827.4,ENST00000539492.1,ENST00000541982.4,ENST00000543755.1,ENST00000544344.4	2328.27	2078.98	27	0.29	0.55	0.16	0.27	0.5	0.79	0.32	0.52	0.29	0.45	0.27	0.42
ENSG00000010626.13	ENST00000007969.11,ENST00000323702.8,ENST00000415834.4,ENST00000428946.4,ENST00000429740.1,ENST00000431207.4,ENST00000433346.4,ENST00000436789.4,ENST00000443597.5,ENST00000449039.4,ENST00000451681.4,ENST00000457146.4,ENST00000472633.1,ENST00000486401.1,ENST00000622489.3	1149.9	900.72	88.3	2.22	4.15	2.5	4.11	2.16	3.39	3.6	5.75	3.49	5.33	2.87	4.42
ENSG00000010671.14	ENST00000308731.7,ENST00000372880.4,ENST00000464006.1,ENST00000464567.1,ENST00000470069.1,ENST00000470329.1,ENST00000478995.1,ENST00000488970.1,ENST00000618050.3,ENST00000621635.3	2417	2167.71	3	0.03	0.06	0.07	0.11	0.05	0.08	0.09	0.14	0.21	0.31	0.06	0.1
ENSG00000010704.17	ENST00000309234.9,ENST00000317896.10,ENST00000336625.11,ENST00000349999.7,ENST00000352392.7,ENST00000353147.8,ENST00000357618.8,ENST00000397022.6,ENST00000461397.4,ENST00000470149.4,ENST00000483782.1,ENST00000485729.1,ENST00000486147.1,ENST00000488199.4	2456.46	2207.17	46	0.47	0.88	0.72	1.18	0.75	1.18	0.72	1.14	0.7	1.07	0.83	1.28
ENSG00000010803.15	ENST00000326197.10,ENST00000337495.8,ENST00000361191.8,ENST00000361705.6,ENST00000372595.4,ENST00000372596.4,ENST00000372597.4,ENST00000397171.5,ENST00000397174.5,ENST00000402904.5,ENST00000456518.3,ENST00000460215.4,ENST00000472037.4,ENST00000482530.1,ENST00000488592.1,ENST00000489421.1,ENST00000498793.4	3064.16	2814.91	1630	13.14	24.5	18.6	30.54	17.76	27.96	26.91	43	28.46	43.44	24.6	37.91
ENSG00000010810.16	ENST00000229471.7,ENST00000354650.6,ENST00000368667.5,ENST00000368678.7,ENST00000368682.6,ENST00000462598.6,ENST00000462856.5,ENST00000467899.4,ENST00000467921.5,ENST00000471959.2,ENST00000476769.5,ENST00000484067.5,ENST00000487824.2,ENST00000491885.5,ENST00000495927.4,ENST00000495935.1,ENST00000496864.5,ENST00000517419.4,ENST00000518295.4,ENST00000518630.4,ENST00000520518.4,ENST00000521062.4,ENS…	1282.36	1033.08	1649	36.22	67.55	42.68	70.07	47.31	74.48	23.17	37.03	25.75	39.31	23.7	36.52
ENSG00000010818.7	ENST00000012134.5,ENST00000367603.5,ENST00000367604.4,ENST00000474532.1	9638.82	9389.53	1579	3.82	7.12	4.93	8.09	4.87	7.66	4.91	7.84	5.47	8.35	5.28	8.14
ENSG00000010932.14	ENST00000354841.4,ENST00000367750.6,ENST00000402921.5,ENST00000433267.4,ENST00000459868.1,ENST00000469112.4,ENST00000469711.1,ENST00000472893.1,ENST00000617670.3	1550.22	1301.55	0	0	0	0	0	0	0	0	0	0	0	0	0
ENSG00000011007.11	ENST00000418390.5,ENST00000487554.1,ENST00000609199.1,ENST00000613537.3	4435.54	4186.25	1903.12	10.32	19.24	12.44	20.43	13.75	21.65	11.72	18.72	13.04	19.91	12.04	18.55
ENSG00000011009.9	ENST00000374501.1,ENST00000374502.6,ENST00000374503.6,ENST00000374505.5,ENST00000374514.6,ENST00000420982.4,ENST00000421070.1,ENST00000472213.1,ENST00000492577.1,ENST00000495365.4	1670.51	1421.22	675	10.78	20.1	13.7	22.5	13.04	20.54	12.96	20.71	14.06	21.47	11.81	18.2
ENSG00000011021.20	ENST00000312413.9,ENST00000346436.9,ENST00000376490.6,ENST00000376491.6,ENST00000376492.3,ENST00000376496.4,ENST00000376497.6,ENST00000494028.1	5428	5178.71	1124	4.92	9.18	6.15	10.1	5.97	9.4	9.76	15.6	10.03	15.31	9.86	15.19
ENSG00000011028.12	ENST00000303375.8,ENST00000446119.2,ENST00000579432.1,ENST00000580916.1,ENST00000583597.4,ENST00000584265.1,ENST00000584682.1	3815.74	3566.46	3192	20.31	37.88	20.39	33.47	25.56	40.24	9.01	14.4	11.15	17.03	10.91	16.81
ENSG00000011052.20	ENST00000376392.9,ENST00000393193.5,ENST00000555572.1	905.77	656.49	27.73	0.96	1.79	0.52	0.85	1.09	1.72	0.68	1.09	2.11	3.22	1.92	2.97
ENSG00000011083.7	ENST00000230671.5,ENST00000513403.1,ENST00000524041.1	2252.33	2003.12	0	0	0	0	0	0	0	0	0	0	0	0.01	0.02
ENSG00000011105.10	ENST00000011898.8,ENST00000407263.1,ENST00000431374.5,ENST00000444315.5,ENST00000492305.1,ENST00000537971.4,ENST00000539631.1	4289.91	4040.62	2657	14.92	27.83	17.12	28.1	15.97	25.14	23.65	37.8	24.24	37.01	25.69	39.58
ENSG00000011114.13	ENST00000298896.6,ENST00000334746.8,ENST00000355125.3,ENST00000553975.1,ENST00000554565.4,ENST00000554644.1,ENST00000554968.1,ENST00000555525.1	6752.97	6504.51	2511	8.76	16.34	9.06	14.87	10.48	16.49	9.97	15.93	10.49	16.01	9.37	14.44
ENSG00000011132.10	ENST00000316757.3,ENST00000586991.1,ENST00000588984.4,ENST00000589934.1,ENST00000590064.1,ENST00000590238.1,ENST00000591678.1,ENST00000592826.1	1452.11	1202.87	180	3.4	6.33	4.17	6.85	4.29	6.76	5.29	8.45	3.96	6.05	4.35	6.7
ENSG00000011143.15	ENST00000313863.9,ENST00000393119.5,ENST00000393120.5,ENST00000537529.5,ENST00000577315.4,ENST00000577824.4,ENST00000578789.1,ENST00000579358.1,ENST00000580127.4,ENST00000581180.1,ENST00000581761.4,ENST00000583577.1,ENST00000585134.1	1883.91	1634.66	169	2.35	4.38	2.86	4.7	2.84	4.47	4.26	6.81	3.86	5.9	3.92	6.04
ENSG00000011198.6	ENST00000013894.2,ENST00000413300.1,ENST00000454293.1,ENST00000456453.4,ENST00000458276.5,ENST00000463153.1,ENST00000486764.1	1618.36	1369.18	247	4.09	7.63	4.97	8.15	5.22	8.22	4.64	7.42	4.63	7.07	5.25	8.08
ENSG00000011201.9	ENST00000262648.6,ENST00000481896.1,ENST00000488294.1,ENST00000619786.1	5307.69	5058.4	2103	9.43	17.59	9.37	15.38	12.04	18.95	1.96	3.14	2.78	4.25	1.89	2.91
ENSG00000011243.16	ENST00000397410.8,ENST00000593845.4,ENST00000594594.5,ENST00000594893.4,ENST00000595067.1,ENST00000595087.4,ENST00000595136.4,ENST00000595465.5,ENST00000595879.4,ENST00000596195.4,ENST00000596213.4,ENST00000596750.2,ENST00000597994.4,ENST00000598292.1,ENST00000599137.4,ENST00000599488.4,ENST00000600065.4,ENST00000600247.4,ENST00000601147.2,ENST00000609519.4	1399.06	1149.86	1186.02	23.4	43.65	28.2	46.3	24.61	38.75	38.99	62.31	35.22	53.77	32.53	50.13
ENSG00000011258.14	ENST00000376381.3,ENST00000405860.6,ENST00000415868.4,ENST00000586178.4,ENST00000586898.1,ENST00000591270.1,ENST00000593259.1	3519.14	3269.88	638	4.43	8.26	5.67	9.31	5.61	8.84	5	8	3.91	5.98	3.66	5.64
ENSG00000011260.12	ENST00000225298.10,ENST00000508506.3,ENST00000579261.5,ENST00000582150.1,ENST00000582832.1,ENST00000583205.4,ENST00000583725.4	1735.42	1486.17	136	2.08	3.87	2.16	3.54	2.36	3.71	2.39	3.82	2.1	3.21	2.77	4.27
ENSG00000011275.17	ENST00000389900.7,ENST00000389902.6,ENST00000411812.1,ENST00000416985.4,ENST00000425013.5,ENST00000469375.1,ENST00000476345.1,ENST00000479541.1,ENST00000484458.2	4742.83	4493.54	1894	9.56	17.84	10.6	17.41	11.42	17.98	11.58	18.5	11.59	17.69	11.12	17.13
ENSG00000011295.14	ENST00000261647.8,ENST00000465567.1,ENST00000466729.4,ENST00000470399.1,ENST00000470649.1,ENST00000475723.4,ENST00000481107.1,ENST00000497842.5,ENST00000578103.1,ENST00000583704.1	2682.01	2432.72	676.29	6.31	11.76	8.28	13.6	7.23	11.39	10.28	16.42	9.47	14.46	10.66	16.42
ENSG00000011304.15	ENST00000349038.7,ENST00000350092.7,ENST00000356948.9,ENST00000394601.7,ENST00000585535.2,ENST00000585856.2,ENST00000585932.4,ENST00000585956.4,ENST00000586481.4,ENST00000586944.4,ENST00000587094.2,ENST00000587136.1,ENST00000587191.3,ENST00000589575.4,ENST00000589883.1,ENST00000590887.4,ENST00000592113.4,ENST00000592804.1,ENST00000621737.3,ENST00000627714.1	2554.14	2306.49	2825	27.79	51.83	28.26	46.39	38.68	60.9	38.22	61.08	48.39	73.87	36.2	55.78
ENSG00000011332.18	ENST00000355526.7,ENST00000412732.4,ENST00000414789.4,ENST00000416611.4,ENST00000418517.4,ENST00000420980.5,ENST00000438060.4,ENST00000438365.4,ENST00000456296.4,ENST00000471976.4,ENST00000472656.4,ENST00000473716.4,ENST00000475938.1,ENST00000488378.1,ENST00000494031.4,ENST00000586624.1,ENST00000614244.3	1194.11	945	28	0.67	1.25	1	1.65	0.63	1	2.3	3.68	3.54	5.4	3.25	5.01
ENSG00000011347.8	ENST00000263846.7,ENST00000535826.4,ENST00000539008.4,ENST00000539246.4,ENST00000539468.4,ENST00000540677.4,ENST00000540831.1,ENST00000542670.4,ENST00000542836.4,ENST00000545053.1	3812.66	3563.37	170	1.08	2.02	1.53	2.52	1.42	2.23	0.31	0.5	0.32	0.49	0.45	0.7
ENSG00000011376.8	ENST00000265537.6,ENST00000414984.4,ENST00000415258.4,ENST00000430399.1,ENST00000431023.4,ENST00000467936.4,ENST00000474585.1,ENST00000485461.1	3930.67	3681.41	707	4.36	8.13	4.46	7.33	5.13	8.07	6.98	11.15	6.04	9.22	7.81	12.04
ENSG00000011405.12	ENST00000265970.10,ENST00000503729.2,ENST00000531428.1,ENST00000532035.1,ENST00000533645.1	7656.94	7407.65	2635	8.07	15.05	9.5	15.6	10.28	16.18	11.73	18.74	12.71	19.41	12.74	19.63
ENSG00000011422.10	ENST00000221264.7,ENST00000339082.6,ENST00000340093.6,ENST00000593396.1,ENST00000593447.4,ENST00000593714.4,ENST00000593939.4,ENST00000594364.1,ENST00000595038.4,ENST00000597107.1,ENST00000598875.1,ENST00000599546.1,ENST00000599892.4,ENST00000601723.4,ENST00000601876.1,ENST00000602141.4	1191.73	942.47	89	2.14	4	1.66	2.73	2.54	4	1.37	2.19	1.92	2.93	1.78	2.75
ENSG00000011426.9	ENST00000265748.5,ENST00000396068.5,ENST00000418118.1,ENST00000424865.1,ENST00000428612.4,ENST00000429082.1,ENST00000441696.4,ENST00000446635.4,ENST00000452877.4,ENST00000457743.1,ENST00000460598.1,ENST00000491782.1,ENST00000495714.1	2929.66	2680.43	1020	8.63	16.1	7.65	12.56	8.74	13.76	42.68	68.21	38.66	59.02	43.9	67.64
ENSG00000011451.16	ENST00000263381.10,ENST00000389282.7,ENST00000545156.4,ENST00000595214.2,ENST00000596159.1,ENST00000599686.3,ENST00000599910.5,ENST00000600632.1	3641.57	3392.29	2104	14.07	26.25	15.64	25.68	16.53	26.03	20.23	32.33	24.1	36.79	19.19	29.58
ENSG00000011454.15	ENST00000317419.7,ENST00000373647.7,ENST00000402311.4,ENST00000426918.2,ENST00000456584.4,ENST00000459903.4,ENST00000468760.1,ENST00000474707.1,ENST00000475607.1,ENST00000480054.1,ENST00000485090.1,ENST00000493854.4,ENST00000616002.1	3229.46	2980.22	2138	16.28	30.36	19.32	31.71	18.37	28.92	29.84	47.68	27.9	42.59	22.03	33.95
ENSG00000011465.15	ENST00000052754.8,ENST00000393155.4,ENST00000420120.5,ENST00000425043.4,ENST00000441303.5,ENST00000456569.2,ENST00000546370.4,ENST00000546391.4,ENST00000546745.4,ENST00000547568.5,ENST00000547937.4,ENST00000548218.1,ENST00000548768.1,ENST00000549513.4,ENST00000550099.4,ENST00000550563.4,ENST00000550758.1,ENST00000551354.1,ENST00000552145.4,ENST00000552962.4	1623.08	1373.82	5205	85.97	160.33	90.19	148.07	111.93	176.22	41.41	66.18	68.2	104.11	47.78	73.63
ENSG00000011478.10	ENST00000012049.8,ENST00000366382.7,ENST00000591606.1,ENST00000592769.1	2116.8	1867.55	127	1.54	2.88	1.72	2.83	1.61	2.54	2.14	3.42	1.75	2.68	1.99	3.07
ENSG00000011485.13	ENST00000012443.7,ENST00000391919.1,ENST00000467502.5,ENST00000467902.2,ENST00000478046.4,ENST00000486994.4,ENST00000487483.5,ENST00000491003.4,ENST00000492109.5,ENST00000493347.4,ENST00000525507.4,ENST00000527193.1,ENST00000527623.1,ENST00000532058.1,ENST00000595055.1	1617.91	1369.36	969	16.06	29.95	18.83	30.91	18.8	29.61	36.72	58.69	35.4	54.04	35.62	54.89
ENSG00000011523.12	ENST00000260569.4,ENST00000377990.5,ENST00000475851.1,ENST00000497039.1,ENST00000537589.1	5644.9	5395.61	1012	4.26	7.94	5.43	8.91	5.58	8.79	6.7	10.71	6.92	10.57	6.19	9.54
ENSG00000011566.13	ENST00000263881.6,ENST00000341681.8,ENST00000414968.1,ENST00000429397.4,ENST00000437545.4,ENST00000437968.1,ENST00000465701.1,ENST00000474502.4,ENST00000475457.1,ENST00000479708.1,ENST00000484274.1,ENST00000495648.3,ENST00000497566.4	3922.47	3673.2	1630	10.07	18.78	13.48	22.13	13.15	20.71	12.47	19.93	12.47	19.04	14.46	22.29
ENSG00000011590.12	ENST00000262630.6,ENST00000392197.5,ENST00000426659.5,ENST00000442282.1,ENST00000451726.1,ENST00000481182.1	1135.64	886.37	7	0.18	0.33	0.19	0.31	0.49	0.78	0.06	0.09	0.06	0.08	0.06	0.09
ENSG00000011600.10	ENST00000262629.7,ENST00000424586.6,ENST00000544690.5,ENST00000585626.1,ENST00000585901.5,ENST00000586946.1,ENST00000587837.4,ENST00000588439.1,ENST00000589517.1	540.15	291.56	27	2.1	3.92	3.11	5.11	4.36	6.86	1.61	2.57	1.45	2.22	2.17	3.34
ENSG00000011638.9	ENST00000233047.7,ENST00000261388.6,ENST00000451578.5,ENST00000572258.4,ENST00000572599.4,ENST00000573487.4,ENST00000573688.1,ENST00000574092.1,ENST00000577162.1	1476.3	1227.03	1341	24.8	46.25	36.3	59.6	32.84	51.71	18.35	29.33	18.57	28.34	17.41	26.83
ENSG00000011677.11	ENST00000370314.7,ENST00000417858.1,ENST00000497894.1,ENST00000535043.1	3712	3462.71	6	0.04	0.07	0.03	0.06	0.01	0.01	0.04	0.06	0.07	0.11	0.07	0.11
ENSG00000012048.18	ENST00000352993.6,ENST00000354071.6,ENST00000357654.6,ENST00000412061.3,ENST00000461221.4,ENST00000461574.1,ENST00000461798.4,ENST00000468300.4,ENST00000470026.4,ENST00000471181.5,ENST00000472490.1,ENST00000473961.4,ENST00000476777.4,ENST00000477152.4,ENST00000478531.4,ENST00000484087.4,ENST00000487825.4,ENST00000489037.1,ENST00000491747.5,ENST00000492859.4,ENST00000493795.4,ENST00000493919.4,ENS…	2578.68	2329.55	173	1.69	3.14	1.92	3.15	2.36	3.71	5.51	8.8	6.12	9.35	6.26	9.65
ENSG00000012061.14	ENST00000013807.8,ENST00000300853.6,ENST00000340192.10,ENST00000423698.5,ENST00000587888.4,ENST00000588300.1,ENST00000588738.4,ENST00000589165.4,ENST00000589214.1,ENST00000589381.4,ENST00000590701.4,ENST00000591636.4,ENST00000592023.4,ENST00000592083.4,ENST00000592410.4,ENST00000592444.4,ENST00000592905.4	1696.38	1447.1	847.21	13.28	24.78	16.01	26.28	16.08	25.31	22.33	35.68	26.15	39.91	22.91	35.3
ENSG00000012124.13	ENST00000085219.8,ENST00000270311.9,ENST00000341773.9,ENST00000419549.5,ENST00000536635.5,ENST00000544992.5,ENST00000593704.1,ENST00000593867.4,ENST00000594125.1,ENST00000594250.4,ENST00000594349.1,ENST00000594954.4,ENST00000595419.4,ENST00000595780.4,ENST00000596492.4,ENST00000597433.1,ENST00000597916.4,ENST00000598028.4,ENST00000598138.4,ENST00000598537.4,ENST00000598815.4,ENST00000599717.4,ENS…	1084.17	835.08	7	0.19	0.35	0.28	0.45	0.08	0.13	0.08	0.12	0.01	0.02	0	0
ENSG00000012171.16	ENST00000416295.1,ENST00000418576.3,ENST00000419007.4,ENST00000433753.3,ENST00000434030.1,ENST00000439487.4,ENST00000441915.4,ENST00000456210.4,ENST00000456560.5,ENST00000611067.3,ENST00000611418.3,ENST00000612509.3,ENST00000616701.3,ENST00000618865.3,ENST00000619119.3,ENST00000621029.3	2454.5	2205.21	176	1.81	3.38	2.04	3.34	2.37	3.74	0.97	1.54	1.31	2	1.06	1.64
ENSG00000012174.10	ENST00000365779.2,ENST00000379484.8,ENST00000465888.1	4324.84	4075.55	1185.95	6.6	12.31	7.78	12.78	8.79	13.84	9.68	15.47	10.82	16.52	9.73	15
ENSG00000012211.11	ENST00000376310.6,ENST00000376317.4,ENST00000432913.4,ENST00000453382.4,ENST00000540849.4,ENST00000599218.4,ENST00000611313.1,ENST00000614014.1	1868.57	1619.33	139	1.95	3.63	2.41	3.96	2.03	3.19	1.35	2.15	1.64	2.51	2.24	3.45
ENSG00000012223.11	ENST00000231751.7,ENST00000417439.4,ENST00000426532.5,ENST00000431944.1,ENST00000443496.4,ENST00000462667.1,ENST00000478874.2,ENST00000493056.4,ENST00000498301.1	1421.56	1172.84	0	0	0	0	0	0	0	0.01	0.02	0	0	0	0
ENSG00000012232.7	ENST00000220562.7,ENST00000454906.5,ENST00000517738.1,ENST00000518223.1,ENST00000519288.4,ENST00000519886.4,ENST00000520679.1,ENST00000520940.1,ENST00000521473.4,ENST00000521532.4,ENST00000522698.1,ENST00000522725.4,ENST00000523149.4,ENST00000523271.1	4030.16	3780.94	3719	22.32	41.63	25.63	42.07	27.81	43.78	62.35	99.65	56.57	86.37	68.14	105
ENSG00000012504.12	ENST00000188403.7,ENST00000321046.8,ENST00000392986.6,ENST00000546380.1,ENST00000548621.1,ENST00000548884.4,ENST00000549996.4,ENST00000551184.1,ENST00000551379.4	2566.5	2317.21	102	1	1.86	1.42	2.32	1.29	2.03	0	0	0	0	0	0
ENSG00000012660.12	ENST00000304434.9,ENST00000370913.5,ENST00000370918.7,ENST00000465983.4,ENST00000485336.4,ENST00000486973.1,ENST00000542638.4	2724.87	2475.59	2918	26.75	49.88	30.72	50.44	35.29	55.57	42.71	68.26	43.26	66.05	43.44	66.93
ENSG00000012779.9	ENST00000374391.5,ENST00000475300.1,ENST00000481117.1,ENST00000483623.2,ENST00000493336.1,ENST00000498461.1,ENST00000542434.4,ENST00000612635.3	2390	2140.71	2	0.02	0.04	0.02	0.04	0.2	0.32	0.21	0.33	0	0	0.06	0.09
ENSG00000012817.14	ENST00000317961.7,ENST00000382806.5,ENST00000415360.1,ENST00000440077.4,ENST00000447300.1,ENST00000469599.5,ENST00000478891.1,ENST00000485154.1,ENST00000492117.1,ENST00000541639.4	4641.77	4392.48	1584	8.18	15.26	10.53	17.29	10.19	16.04	12.08	19.3	13.77	21.02	13.35	20.58
ENSG00000012822.14	ENST00000262059.7,ENST00000430117.5,ENST00000546443.4,ENST00000546619.4,ENST00000546774.1,ENST00000547885.4,ENST00000547949.5,ENST00000547988.4,ENST00000548177.4,ENST00000548263.4,ENST00000548431.1,ENST00000549173.4,ENST00000549349.4,ENST00000549613.1,ENST00000549688.1,ENST00000549784.4,ENST00000549935.5,ENST00000550804.4,ENST00000551900.4,ENST00000552282.1,ENST00000552623.4,ENST00000553154.4	1351.87	1102.72	1639	33.73	62.9	46.16	75.78	39.07	61.52	26.43	42.23	28.77	43.93	24.17	37.24
ENSG00000012963.12	ENST00000013070.9,ENST00000416753.4,ENST00000553674.1,ENST00000553857.4,ENST00000554232.4,ENST00000555113.4,ENST00000555329.1,ENST00000556871.4	3374.82	3125.57	867.86	6.3	11.75	7.61	12.49	7.37	11.61	14.31	22.87	14.46	22.08	14.15	21.8
ENSG00000012983.10	ENST00000013125.7,ENST00000554066.1,ENST00000554091.4,ENST00000554273.1,ENST00000554990.4,ENST00000555216.4,ENST00000557124.1,ENST00000557210.4,ENST00000557390.4,ENST00000557578.1	3495.84	3246.62	1015	7.09	13.23	8.75	14.37	8.67	13.65	8.82	14.1	7.76	11.85	9.57	14.75
ENSG00000013016.13	ENST00000322054.8,ENST00000541626.2	3690.86	3441.57	4426	29.18	54.42	34.24	56.21	33.2	52.27	6.91	11.04	7.94	12.11	8.24	12.7
ENSG00000013275.6	ENST00000157812.5,ENST00000455878.2,ENST00000593455.4,ENST00000596386.1,ENST00000601194.1,ENST00000601697.4	1586.94	1337.65	906	15.37	28.66	18.36	30.14	18.92	29.79	18.48	29.53	19.96	30.47	19.95	30.75
ENSG00000013288.7	ENST00000285599.6,ENST00000504248.4,ENST00000504960.1,ENST00000505907.1,ENST00000510427.1	5367.39	5118.1	803	3.56	6.64	3.89	6.39	4.45	7.01	1.41	2.25	1.78	2.71	1.69	2.61
ENSG00000013293.5	ENST00000231706.5,ENST00000466168.1	10103	9853.71	13	0.03	0.06	0.03	0.05	0.01	0.02	0.04	0.07	0.08	0.12	0.04	0.06
ENSG00000013297.9	ENST00000064724.6,ENST00000468358.4,ENST00000471373.4,ENST00000477531.3,ENST00000480067.1,ENST00000486429.1,ENST00000486975.1,ENST00000488989.1,ENST00000489485.4	2115.31	1866.02	231	2.81	5.24	3.33	5.46	3.77	5.94	4.85	7.76	5.39	8.22	4.89	7.54
ENSG00000013306.14	ENST00000225308.11,ENST00000377095.8,ENST00000537904.5,ENST00000585523.1,ENST00000585636.4,ENST00000585695.4,ENST00000586016.4,ENST00000586633.4,ENST00000588049.4,ENST00000588315.4,ENST00000588767.4,ENST00000590194.4,ENST00000591006.4,ENST00000591151.1,ENST00000592372.4,ENST00000592857.4,ENST00000593166.1	1527.07	1277.8	1416	25.15	46.9	28.13	46.19	29.77	46.87	29.88	47.75	29.44	44.95	29.86	46.01
ENSG00000013364.17	ENST00000357402.8,ENST00000395353.4,ENST00000562463.4,ENST00000563096.1,ENST00000563123.1,ENST00000563558.4,ENST00000563915.4,ENST00000565164.1,ENST00000565830.4,ENST00000566066.4,ENST00000566252.1,ENST00000566554.1,ENST00000566859.4,ENST00000568068.1,ENST00000569612.1,ENST00000569887.1,ENST00000570061.1,ENST00000570234.4,ENST00000629059.1	2202.4	1953.12	996	11.57	21.58	12.68	20.82	13.77	21.67	7.01	11.21	10.64	16.25	9.17	14.13
ENSG00000013374.14	ENST00000413040.5,ENST00000460712.1,ENST00000468404.4,ENST00000470229.4,ENST00000470316.4,ENST00000477666.1,ENST00000480714.1,ENST00000480907.4,ENST00000483358.4,ENST00000493588.4,ENST00000497987.1,ENST00000568733.4	2381.96	2132.68	1128.89	12.01	22.4	12.24	20.09	13.76	21.66	9.38	15	9.59	14.64	9.29	14.32
ENSG00000013375.14	ENST00000283977.7,ENST00000503094.1,ENST00000504780.4,ENST00000505470.4,ENST00000506587.4,ENST00000507404.1,ENST00000507554.1,ENST00000508748.4,ENST00000509219.1,ENST00000510258.1,ENST00000512866.4,ENST00000513973.4,ENST00000515333.1,ENST00000605602.1,ENST00000616566.3	3276.64	3027.45	1897.62	14.22	26.53	15.37	25.23	19.24	30.29	12.22	19.53	9.84	15.01	10.56	16.28
ENSG00000013392.7	ENST00000369724.4	3744	3494.71	346	2.25	4.19	2.51	4.12	2.66	4.19	1.97	3.16	1.96	2.99	1.75	2.7
ENSG00000013441.14	ENST00000321356.7,ENST00000409403.5,ENST00000409769.5,ENST00000432425.4,ENST00000434813.3,ENST00000461326.1,ENST00000461981.4,ENST00000464454.1,ENST00000472679.1,ENST00000473565.4,ENST00000481641.1,ENST00000482590.1,ENST00000492793.1,ENST00000496205.1,ENST00000621181.3	1784.54	1535.34	525	7.76	14.47	9.76	16.02	9.54	15.02	11.61	18.56	8.21	12.53	11.24	17.31
ENSG00000013503.8	ENST00000228347.7,ENST00000539066.4,ENST00000549195.1,ENST00000549569.1	4235.12	3985.83	610	3.47	6.48	3.85	6.32	4.44	6.99	3.51	5.61	3.99	6.08	3.61	5.56
ENSG00000013523.8	ENST00000251089.5,ENST00000554941.1,ENST00000555079.1,ENST00000556298.1,ENST00000557179.4,ENST00000557497.1	4104.23	3854.96	495.49	2.92	5.44	4.24	6.97	4.04	6.36	5.82	9.29	5.26	8.02	4.23	6.51
ENSG00000013561.16	ENST00000347642.6,ENST00000356143.4,ENST00000394514.5,ENST00000394519.4,ENST00000394520.5,ENST00000502341.4,ENST00000506004.4,ENST00000506822.4,ENST00000506938.4,ENST00000507163.4,ENST00000507291.1,ENST00000511961.4,ENST00000512565.4,ENST00000513019.4,ENST00000514620.4,ENST00000515613.4	1436.74	1187.56	1287	24.59	45.86	28.67	47.07	27.38	43.11	28.46	45.48	30.82	47.04	30.28	46.66
ENSG00000013563.12	ENST00000014935.6,ENST00000309585.8,ENST00000369807.4,ENST00000369808.6,ENST00000369809.4,ENST00000393638.4,ENST00000412184.1,ENST00000424626.4,ENST00000432135.1,ENST00000447892.1,ENST00000451865.4,ENST00000497242.1	1798.8	1549.51	510.67	7.48	13.95	8.84	14.51	7.37	11.6	6.33	10.12	6.53	9.97	7.08	10.91
ENSG00000013573.15	ENST00000228264.9,ENST00000350437.7,ENST00000415475.5,ENST00000435753.5,ENST00000438391.5,ENST00000535158.4,ENST00000535317.4,ENST00000536265.4,ENST00000536580.4,ENST00000537136.1,ENST00000538345.1,ENST00000538740.1,ENST00000539049.4,ENST00000539673.4,ENST00000539699.4,ENST00000539702.1,ENST00000540935.4,ENST00000542129.4,ENST00000542242.1,ENST00000542244.4,ENST00000542661.1,ENST00000542777.1,ENS…	1733.92	1484.81	43.47	0.66	1.24	0.65	1.06	0.62	0.97	2.24	3.58	2.96	4.52	2.68	4.14
ENSG00000013583.7	ENST00000014930.7,ENST00000535636.1,ENST00000536942.1,ENST00000540916.1	1188.44	939.15	630	15.22	28.39	19.62	32.21	21.5	33.85	13.21	21.11	13.6	20.75	14.08	21.7
ENSG00000013588.5	ENST00000014914.5,ENST00000534831.1,ENST00000537783.1,ENST00000540125.1,ENST00000542056.1	5192.79	4943.51	2251	10.33	19.27	10.72	17.6	14.91	23.48	0.42	0.67	1.06	1.62	0.8	1.23
[truncated: 60,233 more rows]

## Sheet: RNA_deseq2_results
	baseMean	log2FoldChange	lfcSE	stat	pvalue	padj	gene
[truncated: 23,226 more rows]
[truncated: 2 more columns]

[truncated: 11 more sheets: RNA_pos_GO_genes, gProfiler_pos_GO_results, RNA_neg_GO_genes, gProfiler_neg_GO_results, filtered_motifs_down_expressed, enhancer_motif_down, motif_frequency_down, filtered_motifs_up_expressed, enhancer_motif_up, motif_frequency_up, R3_motifs]
