# Supplementary material for: A gene regulatory element modulates myosin expression and controls cardiomyocyte response to stress
Source: HighWire-hosted journal article supplement (doi:10.1101/gr.280825.125), 2025-10-22
Supplement: Supplemental_Table_S4.xlsx [file Supplemental_Table_S4.xlsx]

## Sheet: Index
Tab	Species	Summary of contents
CRISPRi_r3_vs_NT_contact	Human	Contact matrix for CRISPRi HiCAR experiments.
CRISPRi_r3_vs_NT_deseq2	Human	DeSeq2 results for CRISPRi HiCAR experiments. A positive fold change would an increase in contacts following repression of region R3.
stim_vs_ctrl_NT_contact	Human	Contact matrix for CRISPRa HiCAR experiments comparing ET1 vs control media conditions in cells expressing the NT control gRNA.
stim_vs_ctrl_NT_deseq2	Human	DeSeq2 results for CRISPRa HiCAR experiments comparing ET1 vs control media conditions in cells expressing the NT control gRNA. A positive fold change would an increase in contacts following treatment with ET-1.
stim_vs_ctrl_TA448_contact	Human	Contact matrix for CRISPRa HiCAR experiments comparing ET1 vs control media conditions in cells expressing the region R3 gRNA.
stim_vs_ctrl_TA448_deseq2	Human	DeSeq2 results for CRISPRa HiCAR experiments comparing ET1 vs control media conditions in cells expressing the region R3 gRNA. A positive fold change would an increase in contacts following treatment with ET-1.
TA448_vs_NT_nostim_contact	Human	Contact matrix for CRISPRa HiCAR experiments comparing cells expressing region R3 targeting gRNA vs NT control gRNA in control media conditions.
TA448_vs_NT_nostim_deseq2	Human	DeSeq2 results for CRISPRa HiCAR experiments comparing cells expressing region R3 targeting gRNA vs NT control gRNA in control media conditions. A positive fold change would an increase in contacts following activation of region 3 in control media conditions.
TA448_vs_NT_stim_contact	Human	Contact matrix for CRISPRa HiCAR experiments comparing cells expressing region R3 targeting gRNA vs NT control gRNA in media with ET-1.
TA448_vs_NT_stim_deseq2	Human	DeSeq2 results for CRISPRa HiCAR experiments comparing cells expressing region R3 targeting gRNA vs NT control gRNA in media with ET-1. A positive fold change would an increase in contacts following activation of region 3 in ET-1 media conditions.
HL1_R3_vs_NT_contact	Mouse	Contact matrix for CRISPRa HiCAR experiments comparing cells expressing region R3 targeting gRNA vs NT control gRNA in control media conditions.
HL1_R3_vs_NT_deseq2	Mouse	DeSeq2 results for CRISPRa HiCAR experiments comparing cells expressing region R3 targeting gRNA vs NT control gRNA in control media conditions. A positive fold change would an increase in contacts following activation of region 3 in control media conditions.
hg38_probe_targets	Human	Probe tagets during enrichment of the HiCAR libraries for human samples
hg38_bases_covered	Human	Base coordinates covered by the probe library for human samples
mm39_probe_targets	Mouse	Probe tagets during enrichment of the HiCAR libraries for mouse samples
mm39_bases_covered	Mouse	Base coordinates covered by the probe library for mouse samples

## Sheet: CRISPRi_r3_vs_NT_contact
	region31	region32	nontarget1	nontarget2
chr14.23300000.23310000.chr14.23300000.23310000	123	95	112	93
chr14.23300000.23310000.chr14.23310000.23320000	91	117	84	50
chr14.23300000.23310000.chr14.23320000.23330000	381	417	294	158
chr14.23300000.23310000.chr14.23330000.23340000	11	7	7	8
chr14.23300000.23310000.chr14.23340000.23350000	9	5	7	3
chr14.23300000.23310000.chr14.23350000.23360000	2	12	9	4
chr14.23300000.23310000.chr14.23360000.23370000	4	3	5	2
chr14.23300000.23310000.chr14.23370000.23380000	6	1	4	3
chr14.23300000.23310000.chr14.23380000.23390000	8	10	11	9
chr14.23300000.23310000.chr14.23390000.23400000	49	34	31	31
chr14.23300000.23310000.chr14.23400000.23410000	52	50	31	24
chr14.23300000.23310000.chr14.23410000.23420000	1	0	1	3
chr14.23300000.23310000.chr14.23420000.23430000	2	7	3	0
chr14.23300000.23310000.chr14.23430000.23440000	35	31	39	30
chr14.23300000.23310000.chr14.23440000.23450000	13	15	11	7
chr14.23300000.23310000.chr14.23450000.23460000	3	7	11	3
chr14.23310000.23320000.chr14.23310000.23320000	187	192	137	112
chr14.23310000.23320000.chr14.23320000.23330000	997	1204	739	469
chr14.23310000.23320000.chr14.23330000.23340000	9	15	11	6
chr14.23310000.23320000.chr14.23340000.23350000	12	12	8	10
chr14.23310000.23320000.chr14.23350000.23360000	22	16	4	7
chr14.23310000.23320000.chr14.23360000.23370000	12	10	13	4
chr14.23310000.23320000.chr14.23370000.23380000	7	18	26	6
chr14.23310000.23320000.chr14.23380000.23390000	6	7	9	4
chr14.23310000.23320000.chr14.23390000.23400000	32	44	27	17
chr14.23310000.23320000.chr14.23400000.23410000	55	73	36	17
chr14.23310000.23320000.chr14.23410000.23420000	2	14	0	3
chr14.23310000.23320000.chr14.23420000.23430000	9	13	8	0
chr14.23310000.23320000.chr14.23430000.23440000	54	62	79	22
chr14.23310000.23320000.chr14.23440000.23450000	19	13	15	5
chr14.23310000.23320000.chr14.23450000.23460000	3	14	3	3
chr14.23320000.23330000.chr14.23320000.23330000	2274	2516	2048	1362
chr14.23320000.23330000.chr14.23330000.23340000	470	525	365	201
chr14.23320000.23330000.chr14.23340000.23350000	288	306	167	133
chr14.23320000.23330000.chr14.23350000.23360000	183	243	181	114
chr14.23320000.23330000.chr14.23360000.23370000	147	159	167	149
chr14.23320000.23330000.chr14.23370000.23380000	152	174	225	134
chr14.23320000.23330000.chr14.23380000.23390000	101	158	85	70
chr14.23320000.23330000.chr14.23390000.23400000	212	226	115	69
chr14.23320000.23330000.chr14.23400000.23410000	242	283	155	117
chr14.23320000.23330000.chr14.23410000.23420000	70	67	9	20
chr14.23320000.23330000.chr14.23420000.23430000	65	80	49	29
chr14.23320000.23330000.chr14.23430000.23440000	206	208	123	81
chr14.23320000.23330000.chr14.23440000.23450000	189	228	125	111
chr14.23320000.23330000.chr14.23450000.23460000	204	208	133	91
chr14.23330000.23340000.chr14.23330000.23340000	45	54	51	30
chr14.23330000.23340000.chr14.23340000.23350000	34	32	31	27
chr14.23330000.23340000.chr14.23350000.23360000	18	20	14	11
chr14.23330000.23340000.chr14.23360000.23370000	8	10	12	8
chr14.23330000.23340000.chr14.23370000.23380000	21	10	18	17
chr14.23330000.23340000.chr14.23380000.23390000	18	29	28	14
chr14.23330000.23340000.chr14.23390000.23400000	108	153	56	43
chr14.23330000.23340000.chr14.23400000.23410000	133	206	111	78
chr14.23330000.23340000.chr14.23410000.23420000	4	5	4	3
chr14.23330000.23340000.chr14.23420000.23430000	27	31	13	10
chr14.23330000.23340000.chr14.23430000.23440000	78	121	70	50
chr14.23330000.23340000.chr14.23440000.23450000	21	24	14	14
chr14.23330000.23340000.chr14.23450000.23460000	6	11	6	5
chr14.23340000.23350000.chr14.23340000.23350000	43	52	45	46
chr14.23340000.23350000.chr14.23350000.23360000	22	16	14	19
chr14.23340000.23350000.chr14.23360000.23370000	8	10	15	9
chr14.23340000.23350000.chr14.23370000.23380000	6	19	24	13
chr14.23340000.23350000.chr14.23380000.23390000	27	14	6	15
chr14.23340000.23350000.chr14.23390000.23400000	93	92	42	22
chr14.23340000.23350000.chr14.23400000.23410000	113	124	82	40
chr14.23340000.23350000.chr14.23410000.23420000	3	6	3	0
chr14.23340000.23350000.chr14.23420000.23430000	22	12	5	5
chr14.23340000.23350000.chr14.23430000.23440000	54	64	38	20
chr14.23340000.23350000.chr14.23440000.23450000	15	9	12	15
chr14.23340000.23350000.chr14.23450000.23460000	13	4	5	2
chr14.23350000.23360000.chr14.23350000.23360000	61	54	53	48
chr14.23350000.23360000.chr14.23360000.23370000	28	22	27	18
chr14.23350000.23360000.chr14.23370000.23380000	13	20	18	3
chr14.23350000.23360000.chr14.23380000.23390000	30	27	17	18
chr14.23350000.23360000.chr14.23390000.23400000	78	115	51	29
chr14.23350000.23360000.chr14.23400000.23410000	109	153	61	33
chr14.23350000.23360000.chr14.23410000.23420000	7	9	5	3
chr14.23350000.23360000.chr14.23420000.23430000	5	20	12	3
chr14.23350000.23360000.chr14.23430000.23440000	34	53	29	12
chr14.23350000.23360000.chr14.23440000.23450000	13	9	14	7
chr14.23350000.23360000.chr14.23450000.23460000	7	4	7	4
chr14.23360000.23370000.chr14.23360000.23370000	26	17	22	16
chr14.23360000.23370000.chr14.23370000.23380000	37	28	40	23
chr14.23360000.23370000.chr14.23380000.23390000	18	34	17	12
chr14.23360000.23370000.chr14.23390000.23400000	70	88	59	52
chr14.23360000.23370000.chr14.23400000.23410000	73	101	70	25
chr14.23360000.23370000.chr14.23410000.23420000	4	3	3	2
chr14.23360000.23370000.chr14.23420000.23430000	9	16	4	10
chr14.23360000.23370000.chr14.23430000.23440000	40	71	34	11
chr14.23360000.23370000.chr14.23440000.23450000	7	4	13	6
chr14.23360000.23370000.chr14.23450000.23460000	6	9	6	3
chr14.23370000.23380000.chr14.23370000.23380000	108	106	167	97
chr14.23370000.23380000.chr14.23380000.23390000	78	74	108	54
chr14.23370000.23380000.chr14.23390000.23400000	205	184	197	102
chr14.23370000.23380000.chr14.23400000.23410000	142	136	161	94
chr14.23370000.23380000.chr14.23410000.23420000	3	8	8	5
chr14.23370000.23380000.chr14.23420000.23430000	23	23	24	3
chr14.23370000.23380000.chr14.23430000.23440000	51	72	68	45
chr14.23370000.23380000.chr14.23440000.23450000	16	25	36	19
chr14.23370000.23380000.chr14.23450000.23460000	7	13	15	13
chr14.23380000.23390000.chr14.23380000.23390000	498	539	629	422
chr14.23380000.23390000.chr14.23390000.23400000	696	786	745	476
chr14.23380000.23390000.chr14.23400000.23410000	272	262	284	159
chr14.23380000.23390000.chr14.23410000.23420000	33	21	18	15
chr14.23380000.23390000.chr14.23420000.23430000	35	46	34	30
chr14.23380000.23390000.chr14.23430000.23440000	96	154	104	49
chr14.23380000.23390000.chr14.23440000.23450000	56	77	51	39
chr14.23380000.23390000.chr14.23450000.23460000	35	51	23	31
chr14.23390000.23400000.chr14.23390000.23400000	2168	2507	2491	1552
chr14.23390000.23400000.chr14.23400000.23410000	1488	1791	1639	980
chr14.23390000.23400000.chr14.23410000.23420000	119	168	208	108
chr14.23390000.23400000.chr14.23420000.23430000	190	193	220	130
chr14.23390000.23400000.chr14.23430000.23440000	361	386	364	217
chr14.23390000.23400000.chr14.23440000.23450000	304	375	325	188
chr14.23390000.23400000.chr14.23450000.23460000	209	257	220	101
chr14.23400000.23410000.chr14.23400000.23410000	2280	2650	3090	1955
chr14.23400000.23410000.chr14.23410000.23420000	402	533	509	378
chr14.23400000.23410000.chr14.23420000.23430000	360	357	323	183
chr14.23400000.23410000.chr14.23430000.23440000	429	439	516	247
chr14.23400000.23410000.chr14.23440000.23450000	601	772	611	379
chr14.23400000.23410000.chr14.23450000.23460000	517	615	639	303
chr14.23410000.23420000.chr14.23410000.23420000	281	310	373	270
chr14.23410000.23420000.chr14.23420000.23430000	209	242	216	123
chr14.23410000.23420000.chr14.23430000.23440000	156	219	196	126
chr14.23410000.23420000.chr14.23440000.23450000	56	58	73	50
chr14.23410000.23420000.chr14.23450000.23460000	40	36	40	18
chr14.23420000.23430000.chr14.23420000.23430000	735	894	682	457
chr14.23420000.23430000.chr14.23430000.23440000	686	746	682	472
chr14.23420000.23430000.chr14.23440000.23450000	217	240	196	96
chr14.23420000.23430000.chr14.23450000.23460000	161	155	162	89
chr14.23430000.23440000.chr14.23430000.23440000	1847	1955	1989	1396
chr14.23430000.23440000.chr14.23440000.23450000	1362	1454	1378	773
chr14.23430000.23440000.chr14.23450000.23460000	879	1018	844	468
chr14.23440000.23450000.chr14.23440000.23450000	784	663	732	468
chr14.23440000.23450000.chr14.23450000.23460000	242	234	208	195
chr14.23450000.23460000.chr14.23450000.23460000	244	198	228	146

## Sheet: CRISPRi_r3_vs_NT_deseq2
	baseMean	log2FoldChange	lfcSE	stat	pvalue	padj
chr14.23300000.23310000.chr14.23300000.23310000	105.793	-0.365039	0.281935	-1.29476	0.195402	0.489913
chr14.23300000.23310000.chr14.23310000.23320000	80.9076	0.206812	0.291714	0.708954	0.478353	0.717529
chr14.23300000.23310000.chr14.23320000.23330000	292.254	0.409477	0.174722	2.34359	0.0190991	0.0945406
chr14.23300000.23310000.chr14.23330000.23340000	8.35853	-0.219815	0.913695	-0.240578	0.809882	1
chr14.23300000.23310000.chr14.23340000.23350000	5.68423	0.109508	0.988833	0.110745	0.911819	1
chr14.23300000.23310000.chr14.23350000.23360000	6.34991	-0.321065	1.01421	-0.316568	0.751571	1
chr14.23300000.23310000.chr14.23360000.23370000	3.35703	-0.38883	1.07184	-0.362767	0.716779	1
chr14.23300000.23310000.chr14.23370000.23380000	3.54069	-0.413443	1.10478	-0.374231	0.708232	1
chr14.23300000.23310000.chr14.23380000.23390000	9.57166	-0.616198	0.861867	-0.714957	0.474636	1
chr14.23300000.23310000.chr14.23390000.23400000	36.0504	-0.0517008	0.487821	-0.105983	0.915596	0.947113
chr14.23300000.23310000.chr14.23400000.23410000	37.3231	0.443119	0.455714	0.972364	0.33087	0.606594
chr14.23300000.23310000.chr14.23410000.23420000	1.55052	-2.49332	1.71049	-1.45766	0.144934	1
chr14.23300000.23310000.chr14.23420000.23430000	2.51814	1.2082	1.23187	0.980787	0.326698	1
chr14.23300000.23310000.chr14.23430000.23440000	33.8187	-0.512016	0.47992	-1.06688	0.286027	0.57574
chr14.23300000.23310000.chr14.23440000.23450000	10.9368	0.205733	0.822503	0.25013	0.802487	1
chr14.23300000.23310000.chr14.23450000.23460000	5.66819	-0.848781	1.0054	-0.844223	0.398545	1
chr14.23310000.23320000.chr14.23310000.23320000	151.9	0.147719	0.234626	0.629596	0.528959	0.737562
chr14.23310000.23320000.chr14.23320000.23330000	800.619	0.432674	0.100637	4.29937	1.71288e-05	0.000423937
chr14.23310000.23320000.chr14.23330000.23340000	9.68506	0.0724209	0.860843	0.0841279	0.932955	1
chr14.23310000.23320000.chr14.23340000.23350000	10.5351	-0.0921032	0.849526	-0.108417	0.913665	1
chr14.23310000.23320000.chr14.23350000.23360000	11.5268	1.2723	0.876154	1.45215	0.146461	1
chr14.23310000.23320000.chr14.23360000.23370000	9.07883	0.0247655	0.887423	0.0279072	0.977736	1
chr14.23310000.23320000.chr14.23370000.23380000	13.266	-0.694347	0.829943	-0.83662	0.402806	0.645125
chr14.23310000.23320000.chr14.23380000.23390000	6.24175	-0.395209	0.954586	-0.41401	0.678867	1
chr14.23310000.23320000.chr14.23390000.23400000	28.2247	0.352655	0.526196	0.670197	0.502732	0.731919
chr14.23310000.23320000.chr14.23400000.23410000	41.1285	0.866124	0.439248	1.97183	0.0486285	0.209314
chr14.23310000.23320000.chr14.23410000.23420000	4.32364	1.62713	2.24545	0.724632	0.468678	1
chr14.23310000.23320000.chr14.23420000.23430000	6.40074	1.17958	1.06149	1.11125	0.266463	1
chr14.23310000.23320000.chr14.23430000.23440000	50.383	-0.138923	0.420252	-0.330571	0.740969	0.842412
chr14.23310000.23320000.chr14.23440000.23450000	12.047	0.330861	0.819713	0.40363	0.686485	1
chr14.23310000.23320000.chr14.23450000.23460000	5.23036	0.999768	1.08082	0.925005	0.354963	1
chr14.23320000.23330000.chr14.23320000.23330000	1970.45	0.0557668	0.0532408	1.04744	0.294895	0.57574
chr14.23320000.23330000.chr14.23330000.23340000	365.392	0.3999	0.156541	2.55461	0.0106308	0.0690084
chr14.23320000.23330000.chr14.23340000.23350000	211.443	0.52996	0.205848	2.57452	0.010038	0.0690084
chr14.23320000.23330000.chr14.23350000.23360000	171.931	0.0952547	0.217817	0.437315	0.661883	0.840082
chr14.23320000.23330000.chr14.23360000.23370000	156.929	-0.520624	0.239663	-2.17232	0.0298316	0.134242
chr14.23320000.23330000.chr14.23370000.23380000	168.763	-0.562661	0.21462	-2.62166	0.00875015	0.0666358
chr14.23320000.23330000.chr14.23380000.23390000	98.8295	0.269551	0.287062	0.938999	0.347731	0.625916
chr14.23320000.23330000.chr14.23390000.23400000	143.377	0.828165	0.233608	3.54511	0.000392453	0.00647548
chr14.23320000.23330000.chr14.23400000.23410000	188.087	0.496922	0.211776	2.34645	0.0189534	0.0945406
chr14.23320000.23330000.chr14.23410000.23420000	38.1862	1.69391	0.534301	3.17033	0.00152266	0.0167493
chr14.23320000.23330000.chr14.23420000.23430000	52.1046	0.468653	0.373116	1.25605	0.209098	0.493939
chr14.23320000.23330000.chr14.23430000.23440000	144.706	0.589807	0.232402	2.53787	0.0111529	0.0690084
chr14.23320000.23330000.chr14.23440000.23450000	156.383	0.347903	0.238831	1.45669	0.145202	0.461021
chr14.23320000.23330000.chr14.23450000.23460000	150.218	0.443149	0.22854	1.93904	0.0524962	0.216547
chr14.23330000.23340000.chr14.23330000.23340000	43.3407	-0.134314	0.411249	-0.326601	0.74397	0.842412
chr14.23330000.23340000.chr14.23340000.23350000	30.8673	-0.277961	0.505488	-0.549887	0.582397	0.789826
chr14.23330000.23340000.chr14.23350000.23360000	15.1892	0.148702	0.722323	0.205866	0.836896	0.890889
chr14.23330000.23340000.chr14.23360000.23370000	9.43322	-0.591408	0.862241	-0.685896	0.492779	1
chr14.23330000.23340000.chr14.23370000.23380000	16.9824	-0.634028	0.724067	-0.875649	0.381221	0.639676
chr14.23330000.23340000.chr14.23380000.23390000	21.2764	-0.25049	0.615616	-0.406893	0.684087	0.842412
chr14.23330000.23340000.chr14.23390000.23400000	82.8511	0.942005	0.303233	3.10654	0.00189292	0.0187399
chr14.23330000.23340000.chr14.23400000.23410000	124.318	0.390547	0.26011	1.50147	0.133235	0.454835
chr14.23330000.23340000.chr14.23410000.23420000	3.89267	-0.0829942	1.04341	-0.0795416	0.936602	1
chr14.23330000.23340000.chr14.23420000.23430000	18.7692	0.882858	0.662918	1.33177	0.182934	0.489473
chr14.23330000.23340000.chr14.23430000.23440000	75.6272	0.276483	0.313315	0.882443	0.377537	0.639676
chr14.23330000.23340000.chr14.23440000.23450000	17.748	0.199535	0.678479	0.294092	0.768687	0.842412
chr14.23330000.23340000.chr14.23450000.23460000	6.71757	0.156713	0.951262	0.164742	0.869147	1
chr14.23340000.23350000.chr14.23340000.23350000	47.001	-0.430187	0.412149	-1.04377	0.296593	0.57574
chr14.23340000.23350000.chr14.23350000.23360000	18.2151	-0.310405	0.696586	-0.445608	0.65588	0.840082
chr14.23340000.23350000.chr14.23360000.23370000	10.4857	-0.841777	0.837665	-1.00491	0.314941	1
chr14.23340000.23350000.chr14.23370000.23380000	15.3549	-1.0021	0.76334	-1.31278	0.189256	0.489913
chr14.23340000.23350000.chr14.23380000.23390000	15.6282	0.398505	0.811487	0.491079	0.62337	0.822849
chr14.23340000.23350000.chr14.23390000.23400000	56.5136	1.1229	0.367248	3.05761	0.00223112	0.0200801
chr14.23340000.23350000.chr14.23400000.23410000	83.038	0.554836	0.292617	1.89611	0.057945	0.229462
chr14.23340000.23350000.chr14.23410000.23420000	2.54075	1.21506	1.21907	0.996708	0.318906	1
chr14.23340000.23350000.chr14.23420000.23430000	10.227	1.31356	0.906359	1.44928	0.14726	1
chr14.23340000.23350000.chr14.23430000.23440000	40.6777	0.612099	0.433232	1.41287	0.157695	0.473084
chr14.23340000.23350000.chr14.23440000.23450000	13.3516	-0.670334	0.800611	-0.837278	0.402436	0.645125
chr14.23340000.23350000.chr14.23450000.23460000	5.54653	0.92131	1.05645	0.872081	0.383164	1
chr14.23350000.23360000.chr14.23350000.23360000	53.9419	-0.279744	0.37769	-0.740671	0.458893	0.716219
chr14.23350000.23360000.chr14.23360000.23370000	23.3376	-0.274365	0.583717	-0.470031	0.638333	0.831513
chr14.23350000.23360000.chr14.23370000.23380000	12.0616	0.339521	0.849621	0.399615	0.68944	1
chr14.23350000.23360000.chr14.23380000.23390000	22.4879	0.219044	0.607274	0.360701	0.718323	0.842412
chr14.23350000.23360000.chr14.23390000.23400000	62.3884	0.842835	0.348392	2.41921	0.015554	0.0855473
chr14.23350000.23360000.chr14.23400000.23410000	80.5455	1.05678	0.306326	3.44986	0.000560881	0.00793245
chr14.23350000.23360000.chr14.23410000.23420000	5.57921	0.571123	0.989297	0.577302	0.563735	1
chr14.23350000.23360000.chr14.23420000.23430000	8.92092	0.366349	0.957073	0.38278	0.701883	1
chr14.23350000.23360000.chr14.23430000.23440000	29.0768	0.689538	0.535593	1.28743	0.197945	0.489913
chr14.23350000.23360000.chr14.23440000.23450000	10.4307	-0.322275	0.843431	-0.3821	0.702387	1
chr14.23350000.23360000.chr14.23450000.23460000	5.41015	-0.404118	0.99155	-0.407562	0.683595	1
chr14.23360000.23370000.chr14.23360000.23370000	20.0257	-0.253516	0.642248	-0.394732	0.693041	0.842412
chr14.23360000.23370000.chr14.23370000.23380000	31.3253	-0.362378	0.502798	-0.720723	0.47108	0.717491
chr14.23360000.23370000.chr14.23380000.23390000	19.022	0.383798	0.663354	0.578571	0.562879	0.773958
chr14.23360000.23370000.chr14.23390000.23400000	65.524	0.0376206	0.335006	0.112298	0.910587	0.947113
chr14.23360000.23370000.chr14.23400000.23410000	61.3757	0.496379	0.363928	1.36395	0.172584	0.474605
chr14.23360000.23370000.chr14.23410000.23420000	2.90003	0.0600233	1.10792	0.0541766	0.956794	1
chr14.23360000.23370000.chr14.23420000.23430000	9.75188	0.241243	0.921611	0.261762	0.793505	1
chr14.23360000.23370000.chr14.23430000.23440000	34.7545	0.925725	0.513111	1.80414	0.0712089	0.271142
chr14.23360000.23370000.chr14.23440000.23450000	7.51504	-1.16653	0.944434	-1.23517	0.216768	1
chr14.23360000.23370000.chr14.23450000.23460000	5.5865	0.320492	0.983044	0.32602	0.744409	1
chr14.23370000.23380000.chr14.23370000.23380000	118.695	-0.719338	0.249148	-2.88719	0.00388696	0.0320674
chr14.23370000.23380000.chr14.23380000.23390000	76.4438	-0.490451	0.303939	-1.61365	0.106604	0.390882
chr14.23370000.23380000.chr14.23390000.23400000	164.333	-0.0199188	0.228485	-0.0871777	0.93053	0.949716
chr14.23370000.23380000.chr14.23400000.23410000	129.703	-0.291702	0.241124	-1.20976	0.226371	0.52118
chr14.23370000.23380000.chr14.23410000.23420000	5.91515	-0.688933	0.98478	-0.69958	0.48419	1
chr14.23370000.23380000.chr14.23420000.23430000	16.2406	0.490917	0.777446	0.631449	0.527747	0.737562
chr14.23370000.23380000.chr14.23430000.23440000	57.6314	-0.319613	0.352976	-0.905481	0.36521	0.639676
chr14.23370000.23380000.chr14.23440000.23450000	23.7023	-0.840596	0.582528	-1.44301	0.149017	0.461021
chr14.23370000.23380000.chr14.23450000.23460000	12.328	-0.969477	0.807212	-1.20102	0.229744	1
chr14.23380000.23390000.chr14.23380000.23390000	515.784	-0.456161	0.128622	-3.54653	0.000390341	0.00647548
chr14.23380000.23390000.chr14.23390000.23400000	654.96	-0.15225	0.110483	-1.37804	0.168191	0.474605
chr14.23380000.23390000.chr14.23400000.23410000	235.441	-0.141228	0.192435	-0.733899	0.46301	0.716219
chr14.23380000.23390000.chr14.23410000.23420000	21.0877	0.264716	0.634044	0.417504	0.676309	0.842412
chr14.23380000.23390000.chr14.23420000.23430000	35.6552	-0.135263	0.469361	-0.288185	0.773205	0.842412
chr14.23380000.23390000.chr14.23430000.23440000	93.565	0.300291	0.294359	1.02015	0.307657	0.585731
chr14.23380000.23390000.chr14.23440000.23450000	53.6442	0.10565	0.370692	0.285006	0.775639	0.842412
chr14.23380000.23390000.chr14.23450000.23460000	34.5016	0.140572	0.510038	0.275611	0.782847	0.842412
chr14.23390000.23400000.chr14.23390000.23400000	2116.16	-0.219649	0.0493588	-4.45004	8.58533e-06	0.000423937
chr14.23390000.23400000.chr14.23400000.23410000	1418.97	-0.101668	0.0690749	-1.47186	0.141059	0.461021
chr14.23390000.23400000.chr14.23410000.23420000	146.847	-0.551359	0.239061	-2.30636	0.0210907	0.0994275
chr14.23390000.23400000.chr14.23420000.23430000	178.332	-0.289235	0.210789	-1.37216	0.170014	0.474605
chr14.23390000.23400000.chr14.23430000.23440000	319.317	-0.0591179	0.163873	-0.360755	0.718282	0.842412
chr14.23390000.23400000.chr14.23440000.23450000	284.971	-0.0179401	0.17514	-0.102433	0.918413	0.947113
chr14.23390000.23400000.chr14.23450000.23460000	184.605	0.142508	0.221039	0.64472	0.519108	0.737562
chr14.23400000.23410000.chr14.23400000.23410000	2454.09	-0.463955	0.0444914	-10.428	1.848e-25	1.82952e-23
chr14.23400000.23410000.chr14.23410000.23420000	449.791	-0.38118	0.151714	-2.5125	0.011988	0.0698122
chr14.23400000.23410000.chr14.23420000.23430000	291.492	0.0896573	0.17495	0.512474	0.60832	0.813833
chr14.23400000.23410000.chr14.23430000.23440000	390.626	-0.205718	0.163944	-1.2548	0.20955	0.493939
chr14.23400000.23410000.chr14.23440000.23450000	564.952	0.0396536	0.126607	0.313202	0.754127	0.842412
chr14.23400000.23410000.chr14.23450000.23460000	493.701	-0.130144	0.148397	-0.876996	0.380489	0.639676
chr14.23410000.23420000.chr14.23410000.23420000	308.031	-0.569176	0.170976	-3.32899	0.000871617	0.0107863
chr14.23410000.23420000.chr14.23420000.23430000	188.784	-0.00705798	0.205734	-0.0343063	0.972633	0.982558
chr14.23410000.23420000.chr14.23430000.23440000	169.023	-0.21917	0.222307	-0.98589	0.324187	0.605557
chr14.23410000.23420000.chr14.23440000.23450000	58.9342	-0.547166	0.345055	-1.58574	0.112799	0.398826
chr14.23410000.23420000.chr14.23450000.23460000	31.743	0.00507831	0.498642	0.0101843	0.991874	0.991874
chr14.23420000.23430000.chr14.23420000.23430000	663.668	0.076423	0.113581	0.672849	0.501043	0.731919
chr14.23420000.23430000.chr14.23430000.23440000	628.94	-0.12914	0.116314	-1.11027	0.266884	0.566124
chr14.23420000.23430000.chr14.23440000.23450000	175.679	0.245739	0.218758	1.12334	0.261295	0.566124
chr14.23420000.23430000.chr14.23450000.23460000	136.073	-0.0771247	0.238326	-0.32361	0.746233	0.842412
chr14.23430000.23440000.chr14.23430000.23440000	1763.58	-0.273074	0.0631502	-4.32419	1.5309e-05	0.000423937
chr14.23430000.23440000.chr14.23440000.23450000	1188.57	-0.026422	0.0792836	-0.333259	0.738939	0.842412
chr14.23430000.23440000.chr14.23450000.23460000	761.203	0.116192	0.105064	1.10591	0.268766	0.566124
chr14.23440000.23450000.chr14.23440000.23450000	644.092	-0.152825	0.133134	-1.1479	0.25101	0.564773
chr14.23440000.23450000.chr14.23450000.23460000	219.087	-0.238645	0.22216	-1.0742	0.282732	0.57574
chr14.23450000.23460000.chr14.23450000.23460000	198.97	-0.181019	0.216927	-0.834467	0.404018	0.645125

## Sheet: stim_vs_ctrl_NT_contact
	stim_1	stim_3	ctrl_1	ctrl_3
chr14.23300000.23310000.chr14.23300000.23310000	40	43	37	21
chr14.23300000.23310000.chr14.23310000.23320000	127	135	116	56
chr14.23300000.23310000.chr14.23320000.23330000	747	921	646	237
chr14.23300000.23310000.chr14.23330000.23340000	3	2	3	1
chr14.23300000.23310000.chr14.23340000.23350000	9	5	5	3
chr14.23300000.23310000.chr14.23350000.23360000	5	7	4	3
chr14.23300000.23310000.chr14.23360000.23370000	3	5	2	1
chr14.23300000.23310000.chr14.23370000.23380000	5	1	1	0
chr14.23300000.23310000.chr14.23380000.23390000	29	19	15	6
chr14.23300000.23310000.chr14.23390000.23400000	109	112	98	33
chr14.23300000.23310000.chr14.23400000.23410000	100	109	129	42
chr14.23300000.23310000.chr14.23410000.23420000	4	11	3	0
chr14.23300000.23310000.chr14.23420000.23430000	17	19	10	3
chr14.23300000.23310000.chr14.23430000.23440000	35	47	38	11
chr14.23300000.23310000.chr14.23440000.23450000	4	7	2	2
chr14.23300000.23310000.chr14.23450000.23460000	4	5	1	1
chr14.23310000.23320000.chr14.23310000.23320000	235	250	176	107
chr14.23310000.23320000.chr14.23320000.23330000	1631	1803	1386	572
chr14.23310000.23320000.chr14.23330000.23340000	19	25	19	8
chr14.23310000.23320000.chr14.23340000.23350000	18	20	20	13
chr14.23310000.23320000.chr14.23350000.23360000	24	21	23	4
chr14.23310000.23320000.chr14.23360000.23370000	24	35	20	9
chr14.23310000.23320000.chr14.23370000.23380000	13	23	15	2
chr14.23310000.23320000.chr14.23380000.23390000	24	30	16	7
chr14.23310000.23320000.chr14.23390000.23400000	123	93	74	26
chr14.23310000.23320000.chr14.23400000.23410000	145	132	110	42
chr14.23310000.23320000.chr14.23410000.23420000	11	10	7	2
chr14.23310000.23320000.chr14.23420000.23430000	22	18	9	3
chr14.23310000.23320000.chr14.23430000.23440000	62	56	35	16
chr14.23310000.23320000.chr14.23440000.23450000	16	20	20	4
chr14.23310000.23320000.chr14.23450000.23460000	11	10	12	13
chr14.23320000.23330000.chr14.23320000.23330000	3409	3564	2655	1189
chr14.23320000.23330000.chr14.23330000.23340000	705	779	565	236
chr14.23320000.23330000.chr14.23340000.23350000	471	478	381	146
chr14.23320000.23330000.chr14.23350000.23360000	330	360	338	119
chr14.23320000.23330000.chr14.23360000.23370000	337	403	336	108
chr14.23320000.23330000.chr14.23370000.23380000	280	286	297	98
chr14.23320000.23330000.chr14.23380000.23390000	256	263	227	58
chr14.23320000.23330000.chr14.23390000.23400000	357	375	335	100
chr14.23320000.23330000.chr14.23400000.23410000	379	397	373	131
chr14.23320000.23330000.chr14.23410000.23420000	96	84	72	16
chr14.23320000.23330000.chr14.23420000.23430000	83	100	77	25
chr14.23320000.23330000.chr14.23430000.23440000	241	220	169	74
chr14.23320000.23330000.chr14.23440000.23450000	299	343	283	99
chr14.23320000.23330000.chr14.23450000.23460000	356	389	334	111
chr14.23330000.23340000.chr14.23330000.23340000	20	24	15	13
chr14.23330000.23340000.chr14.23340000.23350000	14	25	14	5
chr14.23330000.23340000.chr14.23350000.23360000	8	4	10	3
chr14.23330000.23340000.chr14.23360000.23370000	6	5	3	4
chr14.23330000.23340000.chr14.23370000.23380000	5	5	4	2
chr14.23330000.23340000.chr14.23380000.23390000	29	34	35	6
chr14.23330000.23340000.chr14.23390000.23400000	232	231	184	68
chr14.23330000.23340000.chr14.23400000.23410000	315	316	272	81
chr14.23330000.23340000.chr14.23410000.23420000	15	9	11	5
chr14.23330000.23340000.chr14.23420000.23430000	29	28	17	5
chr14.23330000.23340000.chr14.23430000.23440000	86	112	88	25
chr14.23330000.23340000.chr14.23440000.23450000	6	8	7	1
chr14.23330000.23340000.chr14.23450000.23460000	5	2	1	3
chr14.23340000.23350000.chr14.23340000.23350000	10	21	11	6
chr14.23340000.23350000.chr14.23350000.23360000	12	1	7	10
chr14.23340000.23350000.chr14.23360000.23370000	7	4	6	3
chr14.23340000.23350000.chr14.23370000.23380000	1	5	6	0
chr14.23340000.23350000.chr14.23380000.23390000	32	25	28	7
chr14.23340000.23350000.chr14.23390000.23400000	198	188	159	48
chr14.23340000.23350000.chr14.23400000.23410000	201	227	183	68
chr14.23340000.23350000.chr14.23410000.23420000	4	5	8	3
chr14.23340000.23350000.chr14.23420000.23430000	32	24	20	5
chr14.23340000.23350000.chr14.23430000.23440000	93	101	79	11
chr14.23340000.23350000.chr14.23440000.23450000	8	1	3	2
chr14.23340000.23350000.chr14.23450000.23460000	1	1	4	2
chr14.23350000.23360000.chr14.23350000.23360000	14	14	17	11
chr14.23350000.23360000.chr14.23360000.23370000	11	12	6	8
chr14.23350000.23360000.chr14.23370000.23380000	9	5	3	3
chr14.23350000.23360000.chr14.23380000.23390000	32	31	22	12
chr14.23350000.23360000.chr14.23390000.23400000	182	202	165	52
chr14.23350000.23360000.chr14.23400000.23410000	207	196	190	53
chr14.23350000.23360000.chr14.23410000.23420000	6	7	7	3
chr14.23350000.23360000.chr14.23420000.23430000	23	31	20	6
chr14.23350000.23360000.chr14.23430000.23440000	68	73	57	14
chr14.23350000.23360000.chr14.23440000.23450000	3	5	2	1
chr14.23350000.23360000.chr14.23450000.23460000	7	5	5	1
chr14.23360000.23370000.chr14.23360000.23370000	9	10	7	10
chr14.23360000.23370000.chr14.23370000.23380000	13	14	4	13
chr14.23360000.23370000.chr14.23380000.23390000	47	26	46	11
chr14.23360000.23370000.chr14.23390000.23400000	254	311	198	78
chr14.23360000.23370000.chr14.23400000.23410000	218	228	166	41
chr14.23360000.23370000.chr14.23410000.23420000	10	3	2	2
chr14.23360000.23370000.chr14.23420000.23430000	35	19	35	10
chr14.23360000.23370000.chr14.23430000.23440000	64	65	86	16
chr14.23360000.23370000.chr14.23440000.23450000	7	6	4	3
chr14.23360000.23370000.chr14.23450000.23460000	4	10	1	2
chr14.23370000.23380000.chr14.23370000.23380000	13	15	16	11
chr14.23370000.23380000.chr14.23380000.23390000	103	73	69	30
chr14.23370000.23380000.chr14.23390000.23400000	445	413	409	103
chr14.23370000.23380000.chr14.23400000.23410000	296	340	327	88
chr14.23370000.23380000.chr14.23410000.23420000	5	6	11	2
chr14.23370000.23380000.chr14.23420000.23430000	36	40	20	16
chr14.23370000.23380000.chr14.23430000.23440000	69	66	68	15
chr14.23370000.23380000.chr14.23440000.23450000	7	6	17	4
chr14.23370000.23380000.chr14.23450000.23460000	2	7	3	5
chr14.23380000.23390000.chr14.23380000.23390000	479	428	461	213
chr14.23380000.23390000.chr14.23390000.23400000	1275	1323	1240	402
chr14.23380000.23390000.chr14.23400000.23410000	611	578	541	174
chr14.23380000.23390000.chr14.23410000.23420000	43	47	53	10
chr14.23380000.23390000.chr14.23420000.23430000	73	55	54	14
chr14.23380000.23390000.chr14.23430000.23440000	121	161	116	46
chr14.23380000.23390000.chr14.23440000.23450000	79	89	65	22
chr14.23380000.23390000.chr14.23450000.23460000	67	55	66	32
chr14.23390000.23400000.chr14.23390000.23400000	2423	2426	2263	883
chr14.23390000.23400000.chr14.23400000.23410000	2036	1952	2036	639
chr14.23390000.23400000.chr14.23410000.23420000	355	354	293	66
chr14.23390000.23400000.chr14.23420000.23430000	320	289	294	76
chr14.23390000.23400000.chr14.23430000.23440000	495	585	493	150
chr14.23390000.23400000.chr14.23440000.23450000	571	487	672	229
chr14.23390000.23400000.chr14.23450000.23460000	444	471	416	165
chr14.23400000.23410000.chr14.23400000.23410000	2096	2152	2376	997
chr14.23400000.23410000.chr14.23410000.23420000	664	695	699	193
chr14.23400000.23410000.chr14.23420000.23430000	514	510	513	193
chr14.23400000.23410000.chr14.23430000.23440000	574	630	635	228
chr14.23400000.23410000.chr14.23440000.23450000	862	815	1196	473
chr14.23400000.23410000.chr14.23450000.23460000	932	887	1074	355
chr14.23410000.23420000.chr14.23410000.23420000	123	150	167	80
chr14.23410000.23420000.chr14.23420000.23430000	183	170	210	76
chr14.23410000.23420000.chr14.23430000.23440000	177	162	200	69
chr14.23410000.23420000.chr14.23440000.23450000	24	21	29	18
chr14.23410000.23420000.chr14.23450000.23460000	26	18	16	12
chr14.23420000.23430000.chr14.23420000.23430000	404	437	404	145
chr14.23420000.23430000.chr14.23430000.23440000	473	489	579	186
chr14.23420000.23430000.chr14.23440000.23450000	117	110	120	46
chr14.23420000.23430000.chr14.23450000.23460000	84	89	50	30
chr14.23430000.23440000.chr14.23430000.23440000	1172	1244	1144	522
chr14.23430000.23440000.chr14.23440000.23450000	590	569	523	179
chr14.23430000.23440000.chr14.23450000.23460000	372	403	311	126
chr14.23440000.23450000.chr14.23440000.23450000	73	86	78	47
chr14.23440000.23450000.chr14.23450000.23460000	39	41	25	19
chr14.23450000.23460000.chr14.23450000.23460000	11	30	20	13

## Sheet: stim_vs_ctrl_NT_deseq2
	baseMean	log2FoldChange	lfcSE	stat	pvalue	padj
chr14.23300000.23310000.chr14.23300000.23310000	34.4345	-0.267853	0.481406	-0.556398	0.577939	0.959235
chr14.23300000.23310000.chr14.23310000.23320000	102.888	-0.14006	0.285682	-0.490263	0.623948	0.959235
chr14.23300000.23310000.chr14.23320000.23330000	570.163	0.232182	0.145069	1.60049	0.109489	0.959235
chr14.23300000.23310000.chr14.23330000.23340000	2.08961	-0.339041	1.84208	-0.184054	0.853971	0.980293
chr14.23300000.23310000.chr14.23340000.23350000	5.26955	0.0210775	1.20003	0.0175641	0.985987	0.996836
chr14.23300000.23310000.chr14.23350000.23360000	4.67863	-0.0675138	1.26734	-0.0532721	0.957515	0.996836
chr14.23300000.23310000.chr14.23360000.23370000	2.43194	0.66778	1.75726	0.380012	0.703937	0.959235
chr14.23300000.23310000.chr14.23370000.23380000	1.32528	1.87925	2.50164	0.75121	0.452526	0.959235
chr14.23300000.23310000.chr14.23380000.23390000	15.2656	0.495033	0.720353	0.687209	0.491951	0.959235
chr14.23300000.23310000.chr14.23390000.23400000	79.0117	0.0880076	0.316466	0.278095	0.78094	0.959235
chr14.23300000.23310000.chr14.23400000.23410000	88.0496	-0.368951	0.30069	-1.22701	0.219817	0.959235
chr14.23300000.23310000.chr14.23410000.23420000	3.36806	1.85013	1.66663	1.1101	0.266955	0.959235
chr14.23300000.23310000.chr14.23420000.23430000	10.3438	0.819257	0.869413	0.942311	0.346033	0.959235
chr14.23300000.23310000.chr14.23430000.23440000	28.9376	0.103863	0.520688	0.199473	0.841893	0.978611
chr14.23300000.23310000.chr14.23440000.23450000	3.53322	0.565711	1.48691	0.380461	0.703604	0.959235
chr14.23300000.23310000.chr14.23450000.23460000	2.41543	1.31007	1.84014	0.711941	0.476501	0.959235
chr14.23310000.23320000.chr14.23310000.23320000	184.381	-0.0366098	0.246203	-0.148698	0.881792	0.982981
chr14.23310000.23320000.chr14.23320000.23330000	1231.96	0.0949189	0.11118	0.853742	0.393248	0.959235
chr14.23310000.23320000.chr14.23330000.23340000	16.3965	-0.010911	0.680299	-0.0160385	0.987204	0.996836
chr14.23310000.23320000.chr14.23340000.23350000	18.2476	-0.617407	0.657279	-0.939338	0.347557	0.959235
chr14.23310000.23320000.chr14.23350000.23360000	15.2272	0.188384	0.721873	0.260966	0.794119	0.959235
chr14.23310000.23320000.chr14.23360000.23370000	19.9107	0.295055	0.62796	0.469863	0.638453	0.959235
chr14.23310000.23320000.chr14.23370000.23380000	10.7938	0.557166	0.877167	0.635188	0.525306	0.959235
chr14.23310000.23320000.chr14.23380000.23390000	17.0844	0.510473	0.674475	0.756845	0.449143	0.959235
chr14.23310000.23320000.chr14.23390000.23400000	69.4323	0.438302	0.350001	1.25229	0.210465	0.959235
chr14.23310000.23320000.chr14.23400000.23410000	96.8084	0.174251	0.289585	0.601728	0.547355	0.959235
chr14.23310000.23320000.chr14.23410000.23420000	6.4155	0.583899	1.08807	0.536639	0.591517	0.959235
chr14.23310000.23320000.chr14.23420000.23430000	10.8961	1.07048	0.860307	1.2443	0.213389	0.959235
chr14.23310000.23320000.chr14.23430000.23440000	37.7797	0.482533	0.458914	1.05147	0.293044	0.959235
chr14.23310000.23320000.chr14.23440000.23450000	12.93	0.0130378	0.772513	0.0168772	0.986535	0.996836
chr14.23310000.23320000.chr14.23450000.23460000	13.4771	-1.21245	0.804226	-1.50759	0.131658	0.959235
chr14.23320000.23330000.chr14.23320000.23330000	2484.68	0.116623	0.104417	1.1169	0.264036	0.959235
chr14.23320000.23330000.chr14.23330000.23340000	519.31	0.17394	0.144227	1.20601	0.227812	0.959235
chr14.23320000.23330000.chr14.23340000.23350000	333.525	0.154944	0.166157	0.932516	0.35107	0.959235
chr14.23320000.23330000.chr14.23350000.23360000	261.941	-0.0808655	0.184115	-0.439212	0.660508	0.959235
chr14.23320000.23330000.chr14.23360000.23370000	264.641	0.0813262	0.190733	0.426386	0.669826	0.959235
chr14.23320000.23330000.chr14.23370000.23380000	219.164	-0.141434	0.199548	-0.708776	0.478464	0.959235
chr14.23320000.23330000.chr14.23380000.23390000	174.204	0.257339	0.236242	1.0893	0.27602	0.959235
chr14.23320000.23330000.chr14.23390000.23400000	258.698	0.112013	0.191912	0.583668	0.559444	0.959235
chr14.23320000.23330000.chr14.23400000.23410000	291.622	-0.0517138	0.175498	-0.294668	0.768247	0.959235
chr14.23320000.23330000.chr14.23410000.23420000	56.8232	0.444924	0.391245	1.1372	0.255454	0.959235
chr14.23320000.23330000.chr14.23420000.23430000	63.2609	0.182583	0.355586	0.51347	0.607622	0.959235
chr14.23320000.23330000.chr14.23430000.23440000	160.491	0.201585	0.233828	0.862105	0.38863	0.959235
chr14.23320000.23330000.chr14.23440000.23450000	230.806	0.0744731	0.196482	0.379032	0.704664	0.959235
chr14.23320000.23330000.chr14.23450000.23460000	266.897	0.0806671	0.18466	0.436841	0.662226	0.959235
chr14.23330000.23340000.chr14.23330000.23340000	18.3306	-0.237779	0.674824	-0.352357	0.72457	0.959235
chr14.23330000.23340000.chr14.23340000.23350000	12.789	0.35382	0.784556	0.450981	0.652004	0.959235
chr14.23330000.23340000.chr14.23350000.23360000	5.92094	-0.750283	1.1283	-0.664967	0.506071	0.959235
chr14.23330000.23340000.chr14.23360000.23370000	4.84684	-0.328092	1.2734	-0.25765	0.796677	0.959235
chr14.23330000.23340000.chr14.23370000.23380000	3.76512	-0.0124634	1.39186	-0.00895444	0.992855	0.996836
chr14.23330000.23340000.chr14.23380000.23390000	22.084	0.0752819	0.608369	0.123744	0.901518	0.996801
chr14.23330000.23340000.chr14.23390000.23400000	160.574	0.19214	0.227901	0.843086	0.39918	0.959235
chr14.23330000.23340000.chr14.23400000.23410000	216.76	0.198866	0.206246	0.964214	0.334939	0.959235
chr14.23330000.23340000.chr14.23410000.23420000	9.44877	-0.141485	0.898621	-0.157447	0.874892	0.982981
chr14.23330000.23340000.chr14.23420000.23430000	16.7649	0.72886	0.683949	1.06566	0.286576	0.959235
chr14.23330000.23340000.chr14.23430000.23440000	68.2575	0.175216	0.350515	0.499882	0.617158	0.959235
chr14.23330000.23340000.chr14.23440000.23450000	4.56318	0.276211	1.28583	0.214812	0.829914	0.978611
chr14.23330000.23340000.chr14.23450000.23460000	3.15482	-0.3235	1.62102	-0.199566	0.84182	0.978611
chr14.23340000.23350000.chr14.23340000.23350000	11.2455	0.0894137	0.843598	0.105991	0.91559	0.996836
chr14.23340000.23350000.chr14.23350000.23360000	9.35638	-1.4736	1.61569	-0.912056	0.361739	0.959235
chr14.23340000.23350000.chr14.23360000.23370000	4.9161	-0.459626	1.23	-0.37368	0.708642	0.959235
chr14.23340000.23350000.chr14.23370000.23380000	2.32438	-0.338012	1.8859	-0.179231	0.857757	0.980293
chr14.23340000.23350000.chr14.23380000.23390000	20.1267	0.0965431	0.622816	0.155011	0.876813	0.982981
chr14.23340000.23350000.chr14.23390000.23400000	130.267	0.255662	0.256323	0.997422	0.31856	0.959235
chr14.23340000.23350000.chr14.23400000.23410000	153.821	0.082224	0.233138	0.352684	0.724325	0.959235
chr14.23340000.23350000.chr14.23410000.23420000	4.94355	-0.979899	1.22063	-0.802784	0.4221	0.959235
chr14.23340000.23350000.chr14.23420000.23430000	17.2122	0.551488	0.679745	0.811316	0.417184	0.959235
chr14.23340000.23350000.chr14.23430000.23440000	58.0417	0.598033	0.420611	1.42182	0.155079	0.959235
chr14.23340000.23350000.chr14.23440000.23450000	3.39534	0.0414474	1.56044	0.0265614	0.97881	0.996836
chr14.23340000.23350000.chr14.23450000.23460000	2.28527	-2.34536	1.90626	-1.23034	0.218568	0.959235
chr14.23350000.23360000.chr14.23350000.23360000	14.6923	-0.820383	0.729331	-1.12484	0.260656	0.959235
chr14.23350000.23360000.chr14.23360000.23370000	9.87032	-0.273738	0.923556	-0.296396	0.766928	0.959235
chr14.23350000.23360000.chr14.23370000.23380000	4.86101	0.327917	1.27487	0.257217	0.797012	0.959235
chr14.23350000.23360000.chr14.23380000.23390000	22.7399	0.12039	0.585404	0.205653	0.837062	0.978611
chr14.23350000.23360000.chr14.23390000.23400000	133.236	0.170289	0.251552	0.676953	0.498436	0.959235
chr14.23350000.23360000.chr14.23400000.23410000	142.492	0.104508	0.25028	0.417562	0.676267	0.959235
chr14.23350000.23360000.chr14.23410000.23420000	5.4792	-0.340383	1.15494	-0.294718	0.768209	0.959235
chr14.23350000.23360000.chr14.23420000.23430000	17.3468	0.406081	0.669031	0.606969	0.543872	0.959235
chr14.23350000.23360000.chr14.23430000.23440000	45.3994	0.381274	0.423957	0.89932	0.368482	0.959235
chr14.23350000.23360000.chr14.23440000.23450000	2.43194	0.66778	1.75726	0.380012	0.703937	0.959235
chr14.23350000.23360000.chr14.23450000.23460000	3.7958	0.423012	1.40381	0.301331	0.763162	0.959235
chr14.23360000.23370000.chr14.23360000.23370000	10.4329	-0.862882	0.914029	-0.944043	0.345148	0.959235
chr14.23360000.23370000.chr14.23370000.23380000	12.9473	-0.53315	0.906244	-0.588307	0.556326	0.959235
chr14.23360000.23370000.chr14.23380000.23390000	28.9987	-0.23142	0.545787	-0.424011	0.671558	0.959235
chr14.23360000.23370000.chr14.23390000.23400000	187.632	0.332433	0.219208	1.51652	0.129388	0.959235
chr14.23360000.23370000.chr14.23400000.23410000	138.896	0.502411	0.261376	1.92218	0.0545837	0.959235
chr14.23360000.23370000.chr14.23410000.23420000	3.93099	0.823663	1.46113	0.563717	0.572947	0.959235
chr14.23360000.23370000.chr14.23420000.23430000	22.6741	-0.361597	0.602185	-0.600476	0.548189	0.959235
chr14.23360000.23370000.chr14.23430000.23440000	50.2128	-0.207462	0.420894	-0.492907	0.622078	0.959235
chr14.23360000.23370000.chr14.23440000.23450000	4.87196	0.0544643	1.24327	0.0438074	0.965058	0.996836
chr14.23360000.23370000.chr14.23450000.23460000	3.87555	1.22322	1.51171	0.80916	0.418423	0.959235
chr14.23370000.23380000.chr14.23370000.23380000	14.4825	-0.784232	0.737738	-1.06302	0.287772	0.959235
chr14.23370000.23380000.chr14.23380000.23390000	63.2082	0.111558	0.368323	0.302881	0.761981	0.959235
chr14.23370000.23380000.chr14.23390000.23400000	298.908	0.148676	0.199567	0.744993	0.456276	0.959235
chr14.23370000.23380000.chr14.23400000.23410000	232.644	0.000833203	0.210108	0.00396561	0.996836	0.996836
chr14.23370000.23380000.chr14.23410000.23420000	5.37721	-0.787763	1.17656	-0.669546	0.503147	0.959235
chr14.23370000.23380000.chr14.23420000.23430000	26.9187	0.215689	0.564277	0.38224	0.702283	0.959235
chr14.23370000.23380000.chr14.23430000.23440000	47.1079	0.118062	0.421145	0.280336	0.77922	0.959235
chr14.23370000.23380000.chr14.23440000.23450000	8.07658	-1.27855	0.972799	-1.3143	0.188745	0.959235
chr14.23370000.23380000.chr14.23450000.23460000	5.0093	-0.893946	1.31041	-0.682189	0.495119	0.959235
chr14.23380000.23390000.chr14.23380000.23390000	379.049	-0.313257	0.171512	-1.82645	0.0677825	0.959235
chr14.23380000.23390000.chr14.23390000.23400000	954.486	0.009566	0.119185	0.080262	0.936029	0.996836
chr14.23380000.23390000.chr14.23400000.23410000	426.09	0.0811161	0.156661	0.517782	0.60461	0.959235
chr14.23380000.23390000.chr14.23410000.23420000	32.9546	-0.0411625	0.502794	-0.0818675	0.934752	0.996836
chr14.23380000.23390000.chr14.23420000.23430000	42.4458	0.299288	0.443188	0.675307	0.499481	0.959235
chr14.23380000.23390000.chr14.23430000.23440000	101.008	0.0962967	0.290703	0.331254	0.740452	0.959235
chr14.23380000.23390000.chr14.23440000.23450000	56.4071	0.280427	0.373677	0.750453	0.452982	0.959235
chr14.23380000.23390000.chr14.23450000.23460000	53.6545	-0.431	0.3891	-1.10768	0.267998	0.959235
chr14.23390000.23400000.chr14.23390000.23400000	1844.1	-0.0758423	0.096282	-0.787711	0.430866	0.959235
chr14.23390000.23400000.chr14.23400000.23410000	1504.72	-0.063965	0.112603	-0.568059	0.569995	0.959235
chr14.23390000.23400000.chr14.23410000.23420000	227.247	0.404573	0.22768	1.77694	0.0755788	0.959235
chr14.23390000.23400000.chr14.23420000.23430000	214.528	0.114063	0.220929	0.516287	0.605654	0.959235
chr14.23390000.23400000.chr14.23430000.23440000	382.601	0.106583	0.169307	0.629524	0.529006	0.959235
chr14.23390000.23400000.chr14.23440000.23450000	458.96	-0.431722	0.156628	-2.75635	0.00584507	0.264977
chr14.23390000.23400000.chr14.23450000.23460000	344.763	-0.0470339	0.164266	-0.286328	0.774627	0.959235
chr14.23400000.23410000.chr14.23400000.23410000	1818.46	-0.388905	0.101469	-3.83272	0.000126732	0.0086178
chr14.23400000.23410000.chr14.23410000.23420000	500.067	-0.0073063	0.1602	-0.0456075	0.963623	0.996836
chr14.23400000.23410000.chr14.23420000.23430000	400.201	-0.152979	0.15402	-0.993239	0.320593	0.959235
chr14.23400000.23410000.chr14.23430000.23440000	477.471	-0.198845	0.144868	-1.3726	0.169876	0.959235
chr14.23400000.23410000.chr14.23440000.23450000	814.382	-0.695722	0.122591	-5.67517	1.38553e-08	1.88433e-06
chr14.23400000.23410000.chr14.23450000.23460000	750.927	-0.308281	0.128226	-2.40419	0.0162083	0.551083
chr14.23410000.23420000.chr14.23410000.23420000	128.467	-0.606044	0.262874	-2.30546	0.0211409	0.575032
chr14.23410000.23420000.chr14.23420000.23430000	149.964	-0.376394	0.235205	-1.60028	0.109536	0.959235
chr14.23410000.23420000.chr14.23430000.23440000	141.493	-0.335574	0.242539	-1.38359	0.166485	0.959235
chr14.23410000.23420000.chr14.23440000.23450000	24.1404	-0.873759	0.577697	-1.51249	0.13041	0.959235
chr14.23410000.23420000.chr14.23450000.23460000	18.0191	-0.196867	0.676999	-0.290794	0.771209	0.959235
chr14.23420000.23430000.chr14.23420000.23430000	317.624	-0.0641224	0.169556	-0.378177	0.705299	0.959235
chr14.23420000.23430000.chr14.23430000.23440000	398.315	-0.321789	0.158323	-2.03249	0.0421043	0.954364
chr14.23420000.23430000.chr14.23440000.23450000	91.7818	-0.241486	0.294248	-0.820687	0.411825	0.959235
chr14.23420000.23430000.chr14.23450000.23460000	58.6747	0.319044	0.383262	0.832446	0.405157	0.959235
chr14.23430000.23440000.chr14.23430000.23440000	967.036	-0.207686	0.126181	-1.64594	0.0997754	0.959235
chr14.23430000.23440000.chr14.23440000.23450000	419.576	0.0559857	0.15381	0.363993	0.715863	0.959235
chr14.23430000.23440000.chr14.23450000.23460000	275.99	0.119731	0.181257	0.660561	0.508894	0.959235
chr14.23440000.23450000.chr14.23440000.23450000	71.1172	-0.460259	0.354406	-1.29868	0.194054	0.959235
chr14.23440000.23450000.chr14.23450000.23460000	30.3328	0.00833835	0.530506	0.0157177	0.98746	0.996836
chr14.23450000.23460000.chr14.23450000.23460000	18.7553	-0.52101	0.692718	-0.752123	0.451977	0.959235

## Sheet: stim_vs_ctrl_TA448_contact
	stim_1	stim_2	stim_3	ctrl_1	ctrl_2	ctrl_3
chr14.23300000.23310000.chr14.23300000.23310000	35	47	28	29	39	31
chr14.23300000.23310000.chr14.23310000.23320000	120	76	46	97	85	52
chr14.23300000.23310000.chr14.23320000.23330000	666	372	280	490	458	353
chr14.23300000.23310000.chr14.23330000.23340000	5	2	3	4	2	8
chr14.23300000.23310000.chr14.23340000.23350000	7	2	1	0	3	2
chr14.23300000.23310000.chr14.23350000.23360000	5	4	1	1	3	4
chr14.23300000.23310000.chr14.23360000.23370000	2	0	3	1	3	3
chr14.23300000.23310000.chr14.23370000.23380000	1	0	0	1	1	1
chr14.23300000.23310000.chr14.23380000.23390000	11	11	4	8	1	11
chr14.23300000.23310000.chr14.23390000.23400000	73	44	31	67	59	45
chr14.23300000.23310000.chr14.23400000.23410000	90	57	60	51	82	58
chr14.23300000.23310000.chr14.23410000.23420000	3	1	2	1	2	1
chr14.23300000.23310000.chr14.23420000.23430000	8	6	8	8	12	8
chr14.23300000.23310000.chr14.23430000.23440000	29	27	16	20	27	17
chr14.23300000.23310000.chr14.23440000.23450000	1	0	2	1	1	2
chr14.23300000.23310000.chr14.23450000.23460000	3	1	6	3	2	0
chr14.23310000.23320000.chr14.23310000.23320000	256	157	138	184	157	128
chr14.23310000.23320000.chr14.23320000.23330000	1580	929	730	1133	1091	730
chr14.23310000.23320000.chr14.23330000.23340000	22	8	8	12	14	15
chr14.23310000.23320000.chr14.23340000.23350000	16	14	1	12	17	7
chr14.23310000.23320000.chr14.23350000.23360000	21	10	9	8	18	12
chr14.23310000.23320000.chr14.23360000.23370000	16	16	3	10	9	10
chr14.23310000.23320000.chr14.23370000.23380000	5	4	8	15	8	4
chr14.23310000.23320000.chr14.23380000.23390000	13	8	9	5	3	5
chr14.23310000.23320000.chr14.23390000.23400000	62	46	34	42	52	31
chr14.23310000.23320000.chr14.23400000.23410000	79	69	50	57	74	68
chr14.23310000.23320000.chr14.23410000.23420000	7	4	2	6	3	2
chr14.23310000.23320000.chr14.23420000.23430000	10	7	1	10	9	7
chr14.23310000.23320000.chr14.23430000.23440000	34	50	25	19	39	45
chr14.23310000.23320000.chr14.23440000.23450000	25	21	10	11	12	15
chr14.23310000.23320000.chr14.23450000.23460000	11	11	8	4	3	6
chr14.23320000.23330000.chr14.23320000.23330000	3187	1943	1483	2202	2265	1690
chr14.23320000.23330000.chr14.23330000.23340000	670	360	292	482	455	295
chr14.23320000.23330000.chr14.23340000.23350000	345	216	125	277	291	196
chr14.23320000.23330000.chr14.23350000.23360000	272	163	147	230	255	179
chr14.23320000.23330000.chr14.23360000.23370000	290	168	100	208	210	180
chr14.23320000.23330000.chr14.23370000.23380000	214	125	102	189	254	160
chr14.23320000.23330000.chr14.23380000.23390000	169	113	77	106	112	82
chr14.23320000.23330000.chr14.23390000.23400000	219	202	128	167	269	116
chr14.23320000.23330000.chr14.23400000.23410000	270	176	140	200	241	169
chr14.23320000.23330000.chr14.23410000.23420000	55	34	26	40	56	24
chr14.23320000.23330000.chr14.23420000.23430000	99	57	28	48	70	31
chr14.23320000.23330000.chr14.23430000.23440000	211	85	92	107	125	76
chr14.23320000.23330000.chr14.23440000.23450000	217	163	129	137	160	153
chr14.23320000.23330000.chr14.23450000.23460000	266	135	134	188	196	160
chr14.23330000.23340000.chr14.23330000.23340000	18	13	6	10	23	21
chr14.23330000.23340000.chr14.23340000.23350000	11	16	6	10	10	8
chr14.23330000.23340000.chr14.23350000.23360000	3	4	4	4	16	5
chr14.23330000.23340000.chr14.23360000.23370000	2	3	1	2	9	3
chr14.23330000.23340000.chr14.23370000.23380000	7	3	2	8	2	2
chr14.23330000.23340000.chr14.23380000.23390000	31	14	9	18	20	8
chr14.23330000.23340000.chr14.23390000.23400000	160	95	90	109	121	66
chr14.23330000.23340000.chr14.23400000.23410000	213	128	111	134	197	124
chr14.23330000.23340000.chr14.23410000.23420000	2	1	1	5	8	0
chr14.23330000.23340000.chr14.23420000.23430000	6	13	8	16	10	10
chr14.23330000.23340000.chr14.23430000.23440000	73	38	38	42	45	24
chr14.23330000.23340000.chr14.23440000.23450000	2	4	4	5	3	6
chr14.23340000.23350000.chr14.23340000.23350000	25	16	11	12	8	6
chr14.23340000.23350000.chr14.23350000.23360000	4	3	3	8	8	1
chr14.23340000.23350000.chr14.23360000.23370000	4	3	6	4	5	2
chr14.23340000.23350000.chr14.23370000.23380000	3	3	2	6	3	0
chr14.23340000.23350000.chr14.23380000.23390000	21	21	13	14	12	10
chr14.23340000.23350000.chr14.23390000.23400000	158	89	51	73	103	53
chr14.23340000.23350000.chr14.23400000.23410000	159	96	88	129	144	93
chr14.23340000.23350000.chr14.23410000.23420000	5	5	1	1	7	4
chr14.23340000.23350000.chr14.23420000.23430000	18	17	4	12	12	4
chr14.23340000.23350000.chr14.23430000.23440000	59	48	25	34	52	26
chr14.23340000.23350000.chr14.23440000.23450000	5	1	4	2	3	0
chr14.23340000.23350000.chr14.23450000.23460000	2	3	1	0	1	0
chr14.23350000.23360000.chr14.23350000.23360000	11	16	7	8	11	8
chr14.23350000.23360000.chr14.23360000.23370000	4	12	1	7	7	7
chr14.23350000.23360000.chr14.23370000.23380000	4	5	4	0	6	4
chr14.23350000.23360000.chr14.23380000.23390000	20	11	8	16	23	12
chr14.23350000.23360000.chr14.23390000.23400000	139	101	68	69	94	98
chr14.23350000.23360000.chr14.23400000.23410000	121	101	48	79	90	67
chr14.23350000.23360000.chr14.23410000.23420000	3	3	1	2	2	1
chr14.23350000.23360000.chr14.23420000.23430000	19	12	8	14	12	4
chr14.23350000.23360000.chr14.23430000.23440000	48	32	21	30	42	37
chr14.23350000.23360000.chr14.23440000.23450000	3	3	1	1	5	1
chr14.23350000.23360000.chr14.23450000.23460000	1	4	2	0	1	1
chr14.23360000.23370000.chr14.23360000.23370000	11	5	7	7	6	9
chr14.23360000.23370000.chr14.23370000.23380000	9	8	4	7	8	8
chr14.23360000.23370000.chr14.23380000.23390000	30	15	7	24	32	20
chr14.23360000.23370000.chr14.23390000.23400000	212	97	72	115	123	86
chr14.23360000.23370000.chr14.23400000.23410000	148	82	76	81	104	71
chr14.23360000.23370000.chr14.23410000.23420000	4	8	1	5	1	0
chr14.23360000.23370000.chr14.23420000.23430000	17	6	10	11	10	9
chr14.23360000.23370000.chr14.23430000.23440000	49	22	25	35	34	20
chr14.23360000.23370000.chr14.23440000.23450000	1	3	2	4	7	2
chr14.23360000.23370000.chr14.23450000.23460000	6	2	3	4	10	2
chr14.23370000.23380000.chr14.23370000.23380000	24	18	13	16	34	16
chr14.23370000.23380000.chr14.23380000.23390000	78	52	39	52	73	34
chr14.23370000.23380000.chr14.23390000.23400000	346	181	166	239	261	160
chr14.23370000.23380000.chr14.23400000.23410000	218	168	117	156	220	101
chr14.23370000.23380000.chr14.23410000.23420000	4	8	3	2	6	3
chr14.23370000.23380000.chr14.23420000.23430000	20	21	8	18	14	14
chr14.23370000.23380000.chr14.23430000.23440000	53	35	38	56	56	24
chr14.23370000.23380000.chr14.23440000.23450000	2	5	1	4	7	10
chr14.23370000.23380000.chr14.23450000.23460000	1	0	1	3	8	3
chr14.23380000.23390000.chr14.23380000.23390000	449	363	199	468	517	288
chr14.23380000.23390000.chr14.23390000.23400000	1103	591	475	800	987	565
chr14.23380000.23390000.chr14.23400000.23410000	431	259	170	280	366	258
chr14.23380000.23390000.chr14.23410000.23420000	28	16	16	30	25	24
chr14.23380000.23390000.chr14.23420000.23430000	37	39	10	28	25	19
chr14.23380000.23390000.chr14.23430000.23440000	82	69	62	79	88	71
chr14.23380000.23390000.chr14.23440000.23450000	48	32	27	55	66	33
chr14.23380000.23390000.chr14.23450000.23460000	42	35	14	41	49	21
chr14.23390000.23400000.chr14.23390000.23400000	2055	1474	1055	1875	2270	1508
chr14.23390000.23400000.chr14.23400000.23410000	1629	985	778	1358	1732	1001
chr14.23390000.23400000.chr14.23410000.23420000	208	110	70	162	192	93
chr14.23390000.23400000.chr14.23420000.23430000	214	133	82	200	167	106
chr14.23390000.23400000.chr14.23430000.23440000	419	212	152	268	341	239
chr14.23390000.23400000.chr14.23440000.23450000	435	268	210	386	452	315
chr14.23390000.23400000.chr14.23450000.23460000	373	224	165	359	388	222
chr14.23400000.23410000.chr14.23400000.23410000	1993	1393	1008	1834	2094	1424
chr14.23400000.23410000.chr14.23410000.23420000	525	314	229	432	486	322
chr14.23400000.23410000.chr14.23420000.23430000	393	264	188	322	396	236
chr14.23400000.23410000.chr14.23430000.23440000	434	315	235	386	559	327
chr14.23400000.23410000.chr14.23440000.23450000	756	492	406	799	1149	671
chr14.23400000.23410000.chr14.23450000.23460000	699	438	415	731	992	581
chr14.23410000.23420000.chr14.23410000.23420000	82	61	42	93	108	75
chr14.23410000.23420000.chr14.23420000.23430000	131	83	66	114	133	103
chr14.23410000.23420000.chr14.23430000.23440000	134	70	60	147	156	109
chr14.23410000.23420000.chr14.23440000.23450000	20	13	10	20	17	12
chr14.23410000.23420000.chr14.23450000.23460000	17	6	7	17	15	12
chr14.23420000.23430000.chr14.23420000.23430000	346	233	138	320	251	210
chr14.23420000.23430000.chr14.23430000.23440000	396	222	199	332	353	335
chr14.23420000.23430000.chr14.23440000.23450000	85	43	61	88	93	72
chr14.23420000.23430000.chr14.23450000.23460000	71	65	36	73	62	57
chr14.23430000.23440000.chr14.23430000.23440000	1131	774	664	1011	1086	792
chr14.23430000.23440000.chr14.23440000.23450000	539	315	288	455	497	385
chr14.23430000.23440000.chr14.23450000.23460000	345	242	199	323	293	224
chr14.23440000.23450000.chr14.23440000.23450000	47	55	58	64	86	95
chr14.23440000.23450000.chr14.23450000.23460000	30	22	24	32	41	29
chr14.23450000.23460000.chr14.23450000.23460000	22	22	13	24	38	28

## Sheet: stim_vs_ctrl_TA448_deseq2
	baseMean	log2FoldChange	lfcSE	stat	pvalue	padj
chr14.23300000.23310000.chr14.23300000.23310000	35.1737	0.297857	0.346949	0.858504	0.390614	0.878882
chr14.23300000.23310000.chr14.23310000.23320000	75.3727	0.120247	0.231007	0.520533	0.602692	0.89369
chr14.23300000.23310000.chr14.23320000.23330000	418.823	0.0770265	0.117029	0.658182	0.510421	0.89369
chr14.23300000.23310000.chr14.23330000.23340000	4.1238	-0.494301	0.966005	-0.511696	0.608864	0.89369
chr14.23300000.23310000.chr14.23340000.23350000	2.22174	0.932331	1.3063	0.713721	0.4754	0.89369
chr14.23300000.23310000.chr14.23350000.23360000	2.89125	0.303742	1.10897	0.273895	0.784165	0.921026
chr14.23300000.23310000.chr14.23360000.23370000	2.1126	-0.311111	1.34827	-0.230748	0.817511	0.927428
chr14.23300000.23310000.chr14.23370000.23380000	0.597764	-1.36651	2.32869	-0.586813	0.557329	0.89369
chr14.23300000.23310000.chr14.23380000.23390000	7.76081	0.350837	0.761484	0.460728	0.644994	0.907023
chr14.23300000.23310000.chr14.23390000.23400000	50.9871	-0.140358	0.26723	-0.525231	0.599422	0.89369
chr14.23300000.23310000.chr14.23400000.23410000	65.6764	0.232681	0.253719	0.917079	0.359101	0.833334
chr14.23300000.23310000.chr14.23410000.23420000	1.63994	0.704843	1.43595	0.490855	0.623529	0.895494
chr14.23300000.23310000.chr14.23420000.23430000	8.37425	-0.188197	0.651253	-0.288977	0.772599	0.921026
chr14.23300000.23310000.chr14.23430000.23440000	22.1905	0.283914	0.399606	0.710486	0.477403	0.89369
chr14.23300000.23310000.chr14.23440000.23450000	1.28597	-0.240652	1.68968	-0.142424	0.886745	0.950084
chr14.23300000.23310000.chr14.23450000.23460000	2.7326	1.33458	1.25826	1.06065	0.288847	0.779886
chr14.23310000.23320000.chr14.23310000.23320000	166.301	0.321221	0.164735	1.94993	0.0511845	0.433957
chr14.23310000.23320000.chr14.23320000.23330000	993.354	0.213532	0.09355	2.28255	0.022457	0.378962
chr14.23310000.23320000.chr14.23330000.23340000	12.6193	-0.0992057	0.535085	-0.185402	0.852914	0.947597
chr14.23310000.23320000.chr14.23340000.23350000	10.1145	-0.182414	0.636952	-0.286386	0.774582	0.921026
chr14.23310000.23320000.chr14.23350000.23360000	12.454	0.13563	0.537572	0.252302	0.800808	0.926431
chr14.23310000.23320000.chr14.23360000.23370000	10.1831	0.289787	0.612331	0.473252	0.636033	0.903837
chr14.23310000.23320000.chr14.23370000.23380000	7.40246	-0.430297	0.741224	-0.580523	0.561562	0.89369
chr14.23310000.23320000.chr14.23380000.23390000	7.32547	1.29733	0.722059	1.79671	0.0723812	0.447347
chr14.23310000.23320000.chr14.23390000.23400000	43.3438	0.29359	0.28645	1.02493	0.305398	0.79286
chr14.23310000.23320000.chr14.23400000.23410000	65.886	0.0945841	0.252697	0.374299	0.708182	0.918853
chr14.23310000.23320000.chr14.23410000.23420000	3.73776	0.285075	0.957886	0.297608	0.766002	0.921026
chr14.23310000.23320000.chr14.23420000.23430000	6.77105	-0.528438	0.732758	-0.721162	0.47081	0.89369
chr14.23310000.23320000.chr14.23430000.23440000	36.0835	0.187521	0.556905	0.33672	0.736328	0.920964
chr14.23310000.23320000.chr14.23440000.23450000	15.3984	0.604504	0.490974	1.23123	0.218236	0.710371
chr14.23310000.23320000.chr14.23450000.23460000	7.43162	1.29969	0.724689	1.79345	0.072901	0.447347
chr14.23320000.23330000.chr14.23320000.23330000	2057.3	0.176462	0.0735948	2.39775	0.0164961	0.371161
chr14.23320000.23330000.chr14.23330000.23340000	407.131	0.174055	0.123082	1.41413	0.157323	0.701112
chr14.23320000.23330000.chr14.23340000.23350000	229.497	-0.0970721	0.143392	-0.676972	0.498424	0.89369
chr14.23320000.23330000.chr14.23350000.23360000	201.513	-0.0962365	0.144844	-0.664414	0.506425	0.89369
chr14.23320000.23330000.chr14.23360000.23370000	183.799	-0.0666995	0.162539	-0.410361	0.681541	0.918853
chr14.23320000.23330000.chr14.23370000.23380000	166.694	-0.365803	0.157974	-2.31559	0.0205808	0.378962
chr14.23320000.23330000.chr14.23380000.23390000	106.292	0.33758	0.187346	1.80191	0.07156	0.447347
chr14.23320000.23330000.chr14.23390000.23400000	177.704	0.143951	0.187729	0.766803	0.443199	0.893013
chr14.23320000.23330000.chr14.23400000.23410000	193.542	0.0336707	0.144756	0.232604	0.816069	0.927428
chr14.23320000.23330000.chr14.23410000.23420000	37.2438	0.0460523	0.314789	0.146296	0.883688	0.950084
chr14.23320000.23330000.chr14.23420000.23430000	51.5124	0.359097	0.28604	1.25541	0.20933	0.710371
chr14.23320000.23330000.chr14.23430000.23440000	110.565	0.39774	0.205749	1.93313	0.0532196	0.433957
chr14.23320000.23330000.chr14.23440000.23450000	158.771	0.268617	0.177725	1.51142	0.130681	0.653406
chr14.23320000.23330000.chr14.23450000.23460000	174.581	0.0477345	0.162582	0.293603	0.769062	0.921026
chr14.23330000.23340000.chr14.23330000.23340000	14.6361	-0.512006	0.519502	-0.985571	0.324344	0.826159
chr14.23330000.23340000.chr14.23340000.23350000	10.0786	0.354744	0.601677	0.589593	0.555463	0.89369
chr14.23330000.23340000.chr14.23350000.23360000	5.78368	-0.950816	0.834784	-1.139	0.254704	0.731597
chr14.23330000.23340000.chr14.23360000.23370000	3.11658	-1.06151	1.10439	-0.961176	0.336464	0.833334
chr14.23330000.23340000.chr14.23370000.23380000	3.72555	0.022615	0.987578	0.0228995	0.98173	0.986662
chr14.23330000.23340000.chr14.23380000.23390000	15.3497	0.28288	0.487109	0.580733	0.56142	0.89369
chr14.23330000.23340000.chr14.23390000.23400000	103.712	0.333959	0.198659	1.68107	0.0927502	0.490066
chr14.23330000.23340000.chr14.23400000.23410000	146.359	0.0858353	0.17098	0.502021	0.615653	0.89369
chr14.23330000.23340000.chr14.23410000.23420000	2.48833	-1.50974	1.30889	-1.15345	0.248725	0.729954
chr14.23330000.23340000.chr14.23420000.23430000	10.7402	-0.233407	0.609667	-0.382843	0.701836	0.918853
chr14.23330000.23340000.chr14.23430000.23440000	41.8676	0.524802	0.298582	1.75764	0.0788081	0.462569
chr14.23330000.23340000.chr14.23440000.23450000	4.27439	-0.319527	0.938803	-0.340356	0.733589	0.920964
chr14.23340000.23350000.chr14.23340000.23350000	12.5972	1.07599	0.538767	1.99714	0.04581	0.433957
chr14.23340000.23350000.chr14.23350000.23360000	4.22701	-0.571312	0.937637	-0.609311	0.542319	0.89369
chr14.23340000.23350000.chr14.23360000.23370000	4.1553	0.481965	0.934483	0.515756	0.606025	0.89369
chr14.23340000.23350000.chr14.23370000.23380000	2.69661	0.0196714	1.17669	0.0167176	0.986662	0.986662
chr14.23340000.23350000.chr14.23380000.23390000	15.145	0.727571	0.488342	1.48988	0.136256	0.656948
chr14.23340000.23350000.chr14.23390000.23400000	82.3883	0.436091	0.226933	1.92168	0.0546465	0.433957
chr14.23340000.23350000.chr14.23400000.23410000	114.661	0.00761926	0.184073	0.0413925	0.966983	0.981524
chr14.23340000.23350000.chr14.23410000.23420000	3.60723	-0.0691049	1.01397	-0.0681531	0.945664	0.974539
chr14.23340000.23350000.chr14.23420000.23430000	10.3763	0.558637	0.610841	0.914536	0.360435	0.833334
chr14.23340000.23350000.chr14.23430000.23440000	38.9491	0.33664	0.310868	1.0829	0.278852	0.779886
chr14.23340000.23350000.chr14.23440000.23450000	2.45694	1.20501	1.26492	0.952637	0.340774	0.833334
chr14.23340000.23350000.chr14.23450000.23460000	1.1578	2.58682	1.90009	1.36142	0.17338	0.701112
chr14.23350000.23360000.chr14.23350000.23360000	10.1562	0.464584	0.600114	0.774159	0.438837	0.893013
chr14.23350000.23360000.chr14.23360000.23370000	6.25087	-0.202972	0.813231	-0.249587	0.802907	0.926431
chr14.23350000.23360000.chr14.23370000.23380000	3.94407	0.547436	1.00865	0.542743	0.587307	0.89369
chr14.23350000.23360000.chr14.23380000.23390000	14.1502	-0.307875	0.493998	-0.623231	0.533133	0.89369
chr14.23350000.23360000.chr14.23390000.23400000	93.5056	0.298492	0.227242	1.31354	0.189001	0.710371
chr14.23350000.23360000.chr14.23400000.23410000	81.3854	0.267762	0.2238	1.19643	0.231528	0.710371
chr14.23350000.23360000.chr14.23410000.23420000	1.90683	0.576926	1.32044	0.436919	0.66217	0.914526
chr14.23350000.23360000.chr14.23420000.23430000	10.8767	0.481777	0.576164	0.836182	0.403053	0.892002
chr14.23350000.23360000.chr14.23430000.23440000	33.9841	-0.0496887	0.329152	-0.15096	0.880007	0.950084
chr14.23350000.23360000.chr14.23440000.23450000	2.15679	0.141678	1.26712	0.111811	0.910973	0.960792
chr14.23350000.23360000.chr14.23450000.23460000	1.66331	2.02106	1.63117	1.23902	0.215336	0.710371
chr14.23360000.23370000.chr14.23360000.23370000	7.54052	0.124802	0.689411	0.181027	0.856347	0.947597
chr14.23360000.23370000.chr14.23370000.23380000	7.18179	-0.0633323	0.69054	-0.0917141	0.926925	0.962576
chr14.23360000.23370000.chr14.23380000.23390000	19.7783	-0.521495	0.431049	-1.20983	0.226346	0.710371
chr14.23360000.23370000.chr14.23390000.23400000	110.823	0.268427	0.198633	1.35137	0.176576	0.701112
chr14.23360000.23370000.chr14.23400000.23410000	90.9695	0.344131	0.205732	1.67272	0.094383	0.490066
chr14.23360000.23370000.chr14.23410000.23420000	3.05383	1.25194	1.19967	1.04357	0.296684	0.78534
chr14.23360000.23370000.chr14.23420000.23430000	10.3047	0.21528	0.58884	0.3656	0.714663	0.918853
chr14.23360000.23370000.chr14.23430000.23440000	29.6409	0.198758	0.352331	0.564124	0.57267	0.89369
chr14.23360000.23370000.chr14.23440000.23450000	3.08527	-0.861759	1.09745	-0.785237	0.432315	0.893013
chr14.23360000.23370000.chr14.23450000.23460000	4.13848	-0.405508	0.933136	-0.434565	0.663878	0.914526
chr14.23370000.23380000.chr14.23370000.23380000	19.3714	-0.141463	0.436068	-0.324407	0.74563	0.921026
chr14.23370000.23380000.chr14.23380000.23390000	52.4466	0.198911	0.267111	0.744674	0.456469	0.89369
chr14.23370000.23380000.chr14.23390000.23400000	216.585	0.155751	0.146186	1.06543	0.28668	0.779886
chr14.23370000.23380000.chr14.23400000.23410000	157.573	0.204733	0.175664	1.16548	0.243824	0.729954
chr14.23370000.23380000.chr14.23410000.23420000	4.34781	0.61943	0.920739	0.672753	0.501105	0.89369
chr14.23370000.23380000.chr14.23420000.23430000	15.45	0.163898	0.487601	0.336132	0.736771	0.920964
chr14.23370000.23380000.chr14.23430000.23440000	42.5671	0.0458664	0.313154	0.146466	0.883553	0.950084
chr14.23370000.23380000.chr14.23440000.23450000	4.88166	-1.3247	0.928765	-1.4263	0.153783	0.701112
chr14.23370000.23380000.chr14.23450000.23460000	2.47376	-2.66446	1.43322	-1.85908	0.0630162	0.447347
chr14.23380000.23390000.chr14.23380000.23390000	363.638	-0.23098	0.13405	-1.72309	0.0848715	0.477402
chr14.23380000.23390000.chr14.23390000.23400000	716.854	-0.0394795	0.103658	-0.380861	0.703306	0.918853
chr14.23380000.23390000.chr14.23400000.23410000	281.059	-0.013235	0.132208	-0.100107	0.920259	0.962576
chr14.23380000.23390000.chr14.23410000.23420000	22.6953	-0.316329	0.397992	-0.794813	0.426722	0.893013
chr14.23380000.23390000.chr14.23420000.23430000	25.1564	0.317296	0.406738	0.780099	0.435333	0.893013
chr14.23380000.23390000.chr14.23430000.23440000	74.9813	-0.0307718	0.235965	-0.130409	0.896243	0.952699
chr14.23380000.23390000.chr14.23440000.23450000	41.6723	-0.406892	0.297296	-1.36864	0.171111	0.701112
chr14.23380000.23390000.chr14.23450000.23460000	31.5717	-0.193139	0.352618	-0.54773	0.583877	0.89369
chr14.23390000.23400000.chr14.23390000.23400000	1649.78	-0.20219	0.0765784	-2.64029	0.00828342	0.279566
chr14.23390000.23400000.chr14.23400000.23410000	1193.79	-0.175332	0.0875619	-2.00237	0.0452445	0.433957
chr14.23390000.23400000.chr14.23410000.23420000	129.92	-0.141085	0.192977	-0.731095	0.464721	0.89369
chr14.23390000.23400000.chr14.23420000.23430000	142.689	-0.0722523	0.184118	-0.392423	0.694746	0.918853
chr14.23390000.23400000.chr14.23430000.23440000	257.837	-0.0728121	0.143024	-0.50909	0.610689	0.89369
chr14.23390000.23400000.chr14.23440000.23450000	331.689	-0.253754	0.116089	-2.18586	0.0288258	0.407978
chr14.23390000.23400000.chr14.23450000.23460000	274.545	-0.260083	0.132722	-1.95962	0.0500408	0.433957
chr14.23400000.23410000.chr14.23400000.23410000	1570.11	-0.188698	0.0738514	-2.5551	0.0106157	0.286625
chr14.23400000.23410000.chr14.23410000.23420000	368.13	-0.140358	0.112317	-1.24966	0.211425	0.710371
chr14.23400000.23410000.chr14.23420000.23430000	288.007	-0.0799835	0.12451	-0.642387	0.520622	0.89369
chr14.23400000.23410000.chr14.23430000.23440000	362.895	-0.257473	0.125736	-2.04773	0.0405863	0.433957
chr14.23400000.23410000.chr14.23440000.23450000	683.454	-0.55262	0.107755	-5.12848	2.92098e-07	3.94332e-05	0.681781	0.318219
chr14.23400000.23410000.chr14.23450000.23460000	620.337	-0.446976	0.114711	-3.89655	9.75725e-05	0.00658614
chr14.23410000.23420000.chr14.23410000.23420000	74.1798	-0.482772	0.222764	-2.16719	0.0302206	0.407978
chr14.23410000.23420000.chr14.23420000.23430000	101.816	-0.2407	0.192923	-1.24765	0.212158	0.710371
chr14.23410000.23420000.chr14.23430000.23440000	107.577	-0.570644	0.190768	-2.99129	0.00277798	0.125009
chr14.23410000.23420000.chr14.23440000.23450000	14.8076	-0.0986892	0.481687	-0.204882	0.837664	0.942372
chr14.23410000.23420000.chr14.23450000.23460000	11.7281	-0.506272	0.550464	-0.919718	0.35772	0.833334
chr14.23420000.23430000.chr14.23420000.23430000	239.786	-0.065517	0.154465	-0.424155	0.671453	0.915618
chr14.23420000.23430000.chr14.23430000.23440000	298.576	-0.259045	0.143219	-1.80873	0.0704933	0.447347
chr14.23420000.23430000.chr14.23440000.23450000	72.6062	-0.304035	0.248224	-1.22484	0.220635	0.710371
chr14.23420000.23430000.chr14.23450000.23460000	59.4396	-0.0710134	0.259782	-0.273358	0.784578	0.921026
chr14.23430000.23440000.chr14.23430000.23440000	889.353	-0.0596926	0.0952631	-0.626607	0.530917	0.89369
chr14.23430000.23440000.chr14.23440000.23450000	401.752	-0.141417	0.116897	-1.20976	0.226373	0.710371
chr14.23430000.23440000.chr14.23450000.23460000	265.134	0.00799926	0.13764	0.058117	0.953655	0.975329
chr14.23440000.23450000.chr14.23440000.23450000	69.5092	-0.430044	0.473933	-0.907395	0.364198	0.833334
chr14.23440000.23450000.chr14.23450000.23460000	29.4067	-0.289831	0.356018	-0.814091	0.415593	0.893013
chr14.23450000.23460000.chr14.23450000.23460000	23.9511	-0.550757	0.39628	-1.38982	0.164584	0.701112

## Sheet: TA448_vs_NT_nostim_contact
	TA448_1	TA448_2	TA448_3	NT_1	NT_3	22616	25946	17362	32078	11896
chr14.23300000.23310000.chr14.23300000.23310000	29	39	31	37	21
chr14.23300000.23310000.chr14.23310000.23320000	97	85	52	116	56
chr14.23300000.23310000.chr14.23320000.23330000	490	458	353	646	237
chr14.23300000.23310000.chr14.23330000.23340000	4	2	8	3	1
chr14.23300000.23310000.chr14.23340000.23350000	0	3	2	5	3
chr14.23300000.23310000.chr14.23350000.23360000	1	3	4	4	3
chr14.23300000.23310000.chr14.23360000.23370000	1	3	3	2	1
chr14.23300000.23310000.chr14.23370000.23380000	1	1	1	1	0
chr14.23300000.23310000.chr14.23380000.23390000	8	1	11	15	6
chr14.23300000.23310000.chr14.23390000.23400000	67	59	45	98	33
chr14.23300000.23310000.chr14.23400000.23410000	51	82	58	129	42
chr14.23300000.23310000.chr14.23410000.23420000	1	2	1	3	0
chr14.23300000.23310000.chr14.23420000.23430000	8	12	8	10	3
chr14.23300000.23310000.chr14.23430000.23440000	20	27	17	38	11
chr14.23300000.23310000.chr14.23440000.23450000	1	1	2	2	2
chr14.23300000.23310000.chr14.23450000.23460000	3	2	0	1	1
chr14.23310000.23320000.chr14.23310000.23320000	184	157	128	176	107
chr14.23310000.23320000.chr14.23320000.23330000	1133	1091	730	1386	572
chr14.23310000.23320000.chr14.23330000.23340000	12	14	15	19	8
chr14.23310000.23320000.chr14.23340000.23350000	12	17	7	20	13
chr14.23310000.23320000.chr14.23350000.23360000	8	18	12	23	4
chr14.23310000.23320000.chr14.23360000.23370000	10	9	10	20	9
chr14.23310000.23320000.chr14.23370000.23380000	15	8	4	15	2
chr14.23310000.23320000.chr14.23380000.23390000	5	3	5	16	7
chr14.23310000.23320000.chr14.23390000.23400000	42	52	31	74	26
chr14.23310000.23320000.chr14.23400000.23410000	57	74	68	110	42
chr14.23310000.23320000.chr14.23410000.23420000	6	3	2	7	2
chr14.23310000.23320000.chr14.23420000.23430000	10	9	7	9	3
chr14.23310000.23320000.chr14.23430000.23440000	19	39	45	35	16
chr14.23310000.23320000.chr14.23440000.23450000	11	12	15	20	4
chr14.23310000.23320000.chr14.23450000.23460000	4	3	6	12	13
chr14.23320000.23330000.chr14.23320000.23330000	2202	2265	1690	2655	1189
chr14.23320000.23330000.chr14.23330000.23340000	482	455	295	565	236
chr14.23320000.23330000.chr14.23340000.23350000	277	291	196	381	146
chr14.23320000.23330000.chr14.23350000.23360000	230	255	179	338	119
chr14.23320000.23330000.chr14.23360000.23370000	208	210	180	336	108
chr14.23320000.23330000.chr14.23370000.23380000	189	254	160	297	98
chr14.23320000.23330000.chr14.23380000.23390000	106	112	82	227	58
chr14.23320000.23330000.chr14.23390000.23400000	167	269	116	335	100
chr14.23320000.23330000.chr14.23400000.23410000	200	241	169	373	131
chr14.23320000.23330000.chr14.23410000.23420000	40	56	24	72	16
chr14.23320000.23330000.chr14.23420000.23430000	48	70	31	77	25
chr14.23320000.23330000.chr14.23430000.23440000	107	125	76	169	74
chr14.23320000.23330000.chr14.23440000.23450000	137	160	153	283	99
chr14.23320000.23330000.chr14.23450000.23460000	188	196	160	334	111
chr14.23330000.23340000.chr14.23330000.23340000	10	23	21	15	13
chr14.23330000.23340000.chr14.23340000.23350000	10	10	8	14	5
chr14.23330000.23340000.chr14.23350000.23360000	4	16	5	10	3
chr14.23330000.23340000.chr14.23360000.23370000	2	9	3	3	4
chr14.23330000.23340000.chr14.23370000.23380000	8	2	2	4	2
chr14.23330000.23340000.chr14.23380000.23390000	18	20	8	35	6
chr14.23330000.23340000.chr14.23390000.23400000	109	121	66	184	68
chr14.23330000.23340000.chr14.23400000.23410000	134	197	124	272	81
chr14.23330000.23340000.chr14.23410000.23420000	5	8	0	11	5
chr14.23330000.23340000.chr14.23420000.23430000	16	10	10	17	5
chr14.23330000.23340000.chr14.23430000.23440000	42	45	24	88	25
chr14.23330000.23340000.chr14.23440000.23450000	5	3	6	7	1
chr14.23330000.23340000.chr14.23450000.23460000	2	2	0	1	3
chr14.23340000.23350000.chr14.23340000.23350000	12	8	6	11	6
chr14.23340000.23350000.chr14.23350000.23360000	8	8	1	7	10
chr14.23340000.23350000.chr14.23360000.23370000	4	5	2	6	3
chr14.23340000.23350000.chr14.23380000.23390000	14	12	10	28	7
chr14.23340000.23350000.chr14.23390000.23400000	73	103	53	159	48
chr14.23340000.23350000.chr14.23400000.23410000	129	144	93	183	68
chr14.23340000.23350000.chr14.23410000.23420000	1	7	4	8	3
chr14.23340000.23350000.chr14.23420000.23430000	12	12	4	20	5
chr14.23340000.23350000.chr14.23430000.23440000	34	52	26	79	11
chr14.23340000.23350000.chr14.23440000.23450000	2	3	0	3	2
chr14.23340000.23350000.chr14.23450000.23460000	0	1	0	4	2
chr14.23350000.23360000.chr14.23350000.23360000	8	11	8	17	11
chr14.23350000.23360000.chr14.23360000.23370000	7	7	7	6	8
chr14.23350000.23360000.chr14.23370000.23380000	0	6	4	3	3
chr14.23350000.23360000.chr14.23380000.23390000	16	23	12	22	12
chr14.23350000.23360000.chr14.23390000.23400000	69	94	98	165	52
chr14.23350000.23360000.chr14.23400000.23410000	79	90	67	190	53
chr14.23350000.23360000.chr14.23410000.23420000	2	2	1	7	3
chr14.23350000.23360000.chr14.23420000.23430000	14	12	4	20	6
chr14.23350000.23360000.chr14.23430000.23440000	30	42	37	57	14
chr14.23350000.23360000.chr14.23440000.23450000	1	5	1	2	1
chr14.23350000.23360000.chr14.23450000.23460000	0	1	1	5	1
chr14.23360000.23370000.chr14.23360000.23370000	7	6	9	7	10
chr14.23360000.23370000.chr14.23370000.23380000	7	8	8	4	13
chr14.23360000.23370000.chr14.23380000.23390000	24	32	20	46	11
chr14.23360000.23370000.chr14.23390000.23400000	115	123	86	198	78
chr14.23360000.23370000.chr14.23400000.23410000	81	104	71	166	41
chr14.23360000.23370000.chr14.23410000.23420000	5	1	0	2	2
chr14.23360000.23370000.chr14.23420000.23430000	11	10	9	35	10
chr14.23360000.23370000.chr14.23430000.23440000	35	34	20	86	16
chr14.23360000.23370000.chr14.23440000.23450000	4	7	2	4	3
chr14.23360000.23370000.chr14.23450000.23460000	4	10	2	1	2
chr14.23370000.23380000.chr14.23370000.23380000	16	34	16	16	11
chr14.23370000.23380000.chr14.23380000.23390000	52	73	34	69	30
chr14.23370000.23380000.chr14.23390000.23400000	239	261	160	409	103
chr14.23370000.23380000.chr14.23400000.23410000	156	220	101	327	88
chr14.23370000.23380000.chr14.23410000.23420000	2	6	3	11	2
chr14.23370000.23380000.chr14.23420000.23430000	18	14	14	20	16
chr14.23370000.23380000.chr14.23430000.23440000	56	56	24	68	15
chr14.23370000.23380000.chr14.23440000.23450000	4	7	10	17	4
chr14.23370000.23380000.chr14.23450000.23460000	3	8	3	3	5
chr14.23380000.23390000.chr14.23380000.23390000	468	517	288	461	213
chr14.23380000.23390000.chr14.23390000.23400000	800	987	565	1240	402
chr14.23380000.23390000.chr14.23400000.23410000	280	366	258	541	174
chr14.23380000.23390000.chr14.23410000.23420000	30	25	24	53	10
chr14.23380000.23390000.chr14.23420000.23430000	28	25	19	54	14
chr14.23380000.23390000.chr14.23430000.23440000	79	88	71	116	46
chr14.23380000.23390000.chr14.23440000.23450000	55	66	33	65	22
chr14.23380000.23390000.chr14.23450000.23460000	41	49	21	66	32
chr14.23390000.23400000.chr14.23390000.23400000	1875	2270	1508	2263	883
chr14.23390000.23400000.chr14.23400000.23410000	1358	1732	1001	2036	639
chr14.23390000.23400000.chr14.23410000.23420000	162	192	93	293	66
chr14.23390000.23400000.chr14.23420000.23430000	200	167	106	294	76
chr14.23390000.23400000.chr14.23430000.23440000	268	341	239	493	150
chr14.23390000.23400000.chr14.23440000.23450000	386	452	315	672	229
chr14.23390000.23400000.chr14.23450000.23460000	359	388	222	416	165
chr14.23400000.23410000.chr14.23400000.23410000	1834	2094	1424	2376	997
chr14.23400000.23410000.chr14.23410000.23420000	432	486	322	699	193
chr14.23400000.23410000.chr14.23420000.23430000	322	396	236	513	193
chr14.23400000.23410000.chr14.23430000.23440000	386	559	327	635	228
chr14.23400000.23410000.chr14.23440000.23450000	799	1149	671	1196	473
chr14.23400000.23410000.chr14.23450000.23460000	731	992	581	1074	355
chr14.23410000.23420000.chr14.23410000.23420000	93	108	75	167	80
chr14.23410000.23420000.chr14.23420000.23430000	114	133	103	210	76
chr14.23410000.23420000.chr14.23430000.23440000	147	156	109	200	69
chr14.23410000.23420000.chr14.23440000.23450000	20	17	12	29	18
chr14.23410000.23420000.chr14.23450000.23460000	17	15	12	16	12
chr14.23420000.23430000.chr14.23420000.23430000	320	251	210	404	145
chr14.23420000.23430000.chr14.23430000.23440000	332	353	335	579	186
chr14.23420000.23430000.chr14.23440000.23450000	88	93	72	120	46
chr14.23420000.23430000.chr14.23450000.23460000	73	62	57	50	30
chr14.23430000.23440000.chr14.23430000.23440000	1011	1086	792	1144	522
chr14.23430000.23440000.chr14.23440000.23450000	455	497	385	523	179
chr14.23430000.23440000.chr14.23450000.23460000	323	293	224	311	126
chr14.23440000.23450000.chr14.23440000.23450000	64	86	95	78	47
chr14.23440000.23450000.chr14.23450000.23460000	32	41	29	25	19
chr14.23450000.23460000.chr14.23450000.23460000	24	38	28	20	13

## Sheet: TA448_vs_NT_nostim_deseq2
	baseMean	log2FoldChange	lfcSE	stat	pvalue	padj
chr14.23300000.23310000.chr14.23300000.23310000	31.2488	0.192847	0.425639	0.453077	0.650493	0.985424
chr14.23300000.23310000.chr14.23310000.23320000	78.6341	-0.123615	0.283781	-0.435602	0.663126	0.985424
chr14.23300000.23310000.chr14.23320000.23330000	415.675	0.0740252	0.144113	0.513662	0.607489	0.985424
chr14.23300000.23310000.chr14.23330000.23340000	3.74907	1.44644	1.31332	1.10136	0.270739	0.985424
chr14.23300000.23310000.chr14.23340000.23350000	2.62614	-1.29581	1.44487	-0.896837	0.369806	0.985424
chr14.23300000.23310000.chr14.23350000.23360000	3.17835	-0.415961	1.2873	-0.323127	0.746599	0.988146
chr14.23300000.23310000.chr14.23360000.23370000	2.00402	0.707984	1.6275	0.435014	0.663553	0.985424
chr14.23300000.23310000.chr14.23370000.23380000	0.722345	1.08844	2.56881	0.423712	0.671776	0.985424
chr14.23300000.23310000.chr14.23380000.23390000	8.27106	-0.467583	0.89245	-0.523932	0.600326	0.985424
chr14.23300000.23310000.chr14.23390000.23400000	56.848	-0.0836938	0.311884	-0.268349	0.788431	0.994478
chr14.23300000.23310000.chr14.23400000.23410000	67.6796	-0.301104	0.294339	-1.02298	0.306316	0.985424
chr14.23300000.23310000.chr14.23410000.23420000	1.13553	0.215455	2.0909	0.103044	0.917928	0.995559
chr14.23300000.23310000.chr14.23420000.23430000	7.71143	0.650432	0.826796	0.78669	0.431463	0.985424
chr14.23300000.23310000.chr14.23430000.23440000	20.8633	-0.0626055	0.496556	-0.12608	0.899669	0.995559
chr14.23300000.23310000.chr14.23440000.23450000	1.77256	-0.6682	1.68433	-0.396716	0.691577	0.985424
chr14.23300000.23310000.chr14.23450000.23460000	1.36622	0.547134	2.00611	0.272734	0.785058	0.994478
chr14.23310000.23320000.chr14.23310000.23320000	150.397	0.110252	0.23984	0.459692	0.645737	0.985424
chr14.23310000.23320000.chr14.23320000.23330000	940.292	0.0628319	0.124278	0.505576	0.613154	0.985424
chr14.23310000.23320000.chr14.23330000.23340000	13.3282	0.112158	0.629335	0.178216	0.858553	0.995559
chr14.23310000.23320000.chr14.23340000.23350000	13.7105	-0.5352	0.62599	-0.854966	0.39257	0.985424
chr14.23310000.23320000.chr14.23350000.23360000	11.6284	0.141078	0.69127	0.204086	0.838286	0.995559
chr14.23310000.23320000.chr14.23360000.23370000	11.3733	-0.511944	0.670737	-0.763256	0.445311	0.985424
chr14.23310000.23320000.chr14.23370000.23380000	7.68987	0.331576	0.867327	0.382296	0.702242	0.985424
chr14.23310000.23320000.chr14.23380000.23390000	7.03767	-1.31862	0.864719	-1.52491	0.127282	0.985424
chr14.23310000.23320000.chr14.23390000.23400000	42.1658	-0.168805	0.352362	-0.479066	0.631892	0.985424
chr14.23310000.23320000.chr14.23400000.23410000	67.5736	-0.0908211	0.297509	-0.305272	0.760159	0.994478
chr14.23310000.23320000.chr14.23410000.23420000	3.67412	-0.155971	1.17118	-0.133174	0.894055	0.995559
chr14.23310000.23320000.chr14.23420000.23430000	7.2298	0.647641	0.852357	0.759824	0.44736	0.985424
chr14.23310000.23320000.chr14.23430000.23440000	30.7935	0.521127	0.482745	1.07951	0.280361	0.985424
chr14.23310000.23320000.chr14.23440000.23450000	11.5661	0.325257	0.691629	0.470276	0.638158	0.985424
chr14.23310000.23320000.chr14.23450000.23460000	8.64326	-1.67977	0.846824	-1.98361	0.0472997	0.955692
chr14.23320000.23330000.chr14.23320000.23330000	1938.85	0.130646	0.112076	1.16569	0.243739	0.985424
chr14.23320000.23330000.chr14.23330000.23340000	389.167	0.0887069	0.154934	0.572546	0.566952	0.985424
chr14.23320000.23330000.chr14.23340000.23350000	245.482	0.0316254	0.164879	0.191809	0.847891	0.995559
chr14.23320000.23330000.chr14.23350000.23360000	211.913	0.0578702	0.172486	0.335506	0.737244	0.985424
chr14.23320000.23330000.chr14.23360000.23370000	196.543	-0.0161476	0.187103	-0.0863029	0.931226	0.996986
chr14.23320000.23330000.chr14.23370000.23380000	187.071	0.137261	0.186078	0.737653	0.460725	0.985424
chr14.23320000.23330000.chr14.23380000.23390000	106.551	-0.331506	0.242332	-1.36798	0.171318	0.985424
chr14.23320000.23330000.chr14.23390000.23400000	180.066	-0.128581	0.217632	-0.590817	0.554643	0.985424
chr14.23320000.23330000.chr14.23400000.23410000	209.909	-0.204519	0.172962	-1.18246	0.237025	0.985424
chr14.23320000.23330000.chr14.23410000.23420000	37.0804	0.0303797	0.399475	0.0760491	0.93938	0.996986
chr14.23320000.23330000.chr14.23420000.23430000	46.3073	0.0545375	0.350535	0.155584	0.876361	0.995559
chr14.23320000.23330000.chr14.23430000.23440000	105.694	-0.199516	0.235163	-0.848413	0.396208	0.985424
chr14.23320000.23330000.chr14.23440000.23450000	158.575	-0.218769	0.213296	-1.02566	0.305052	0.985424
chr14.23320000.23330000.chr14.23450000.23460000	186.345	-0.167441	0.186362	-0.898471	0.368934	0.985424
chr14.23330000.23340000.chr14.23330000.23340000	17.102	0.276919	0.615801	0.449689	0.652934	0.985424
chr14.23330000.23340000.chr14.23340000.23350000	8.94142	0.0818242	0.750283	0.109058	0.913157	0.995559
chr14.23330000.23340000.chr14.23350000.23360000	6.88129	0.437283	0.90784	0.481674	0.630037	0.985424
chr14.23330000.23340000.chr14.23360000.23370000	4.33275	0.162592	1.14904	0.141503	0.887473	0.995559
chr14.23330000.23340000.chr14.23370000.23380000	3.51726	0.448728	1.25733	0.356889	0.721175	0.985424
chr14.23330000.23340000.chr14.23380000.23390000	15.0606	-0.205829	0.606991	-0.339097	0.734536	0.985424
chr14.23330000.23340000.chr14.23390000.23400000	102.796	-0.275649	0.239243	-1.15217	0.249251	0.985424
chr14.23330000.23340000.chr14.23400000.23410000	149.547	-0.0821318	0.21062	-0.389952	0.696572	0.985424
chr14.23330000.23340000.chr14.23410000.23420000	5.34366	-0.941668	1.04394	-0.902035	0.367039	0.985424
chr14.23330000.23340000.chr14.23420000.23430000	10.9411	0.279873	0.697484	0.401261	0.688228	0.985424
chr14.23330000.23340000.chr14.23430000.23440000	40.7056	-0.47508	0.365381	-1.30023	0.193522	0.985424
chr14.23330000.23340000.chr14.23440000.23450000	4.11458	0.53075	1.14959	0.461688	0.644305	0.985424
chr14.23330000.23340000.chr14.23450000.23460000	1.85907	-1.06638	1.74366	-0.611576	0.540819	0.985424
chr14.23340000.23350000.chr14.23340000.23350000	8.47502	0.0355929	0.785532	0.0453106	0.96386	0.996986
chr14.23340000.23350000.chr14.23350000.23360000	7.36858	-0.917735	0.925405	-0.991712	0.321338	0.985424
chr14.23340000.23350000.chr14.23360000.23370000	3.84105	-0.300177	1.13242	-0.265076	0.790951	0.994478
chr14.23340000.23350000.chr14.23380000.23390000	12.9389	-0.361584	0.627892	-0.57587	0.564703	0.985424
chr14.23340000.23350000.chr14.23390000.23400000	79.8858	-0.319201	0.270686	-1.17923	0.238306	0.985424
chr14.23340000.23350000.chr14.23400000.23410000	116.833	0.0454367	0.221734	0.204916	0.837638	0.995559
chr14.23340000.23350000.chr14.23410000.23420000	4.33465	-0.381126	1.1098	-0.34342	0.731283	0.985424
chr14.23340000.23350000.chr14.23420000.23430000	9.42422	-0.283626	0.746307	-0.380039	0.703916	0.985424
chr14.23340000.23350000.chr14.23430000.23440000	34.9264	-0.00671395	0.434217	-0.0154622	0.987663	0.996986
chr14.23340000.23350000.chr14.23440000.23450000	1.93072	-0.729569	1.63941	-0.445018	0.656307	0.985424
chr14.23340000.23350000.chr14.23450000.23460000	1.34446	-3.04155	2.10498	-1.44493	0.148477	0.985424
chr14.23350000.23360000.chr14.23350000.23360000	11.1475	-0.6796	0.684092	-0.993433	0.320499	0.985424
chr14.23350000.23360000.chr14.23360000.23370000	7.66454	-0.192411	0.859744	-0.2238	0.822913	0.995559
chr14.23350000.23360000.chr14.23370000.23380000	3.35893	0.00619288	1.34441	0.00460641	0.996325	0.996986
chr14.23350000.23360000.chr14.23380000.23390000	16.5831	-0.0118419	0.563794	-0.021004	0.983242	0.996986
chr14.23350000.23360000.chr14.23390000.23400000	90.6884	-0.154167	0.282742	-0.545257	0.585576	0.985424
chr14.23350000.23360000.chr14.23400000.23410000	87.8402	-0.466389	0.256773	-1.81635	0.0693172	0.985424
chr14.23350000.23360000.chr14.23410000.23420000	2.84676	-1.5443	1.33224	-1.15917	0.246386	0.985424
chr14.23350000.23360000.chr14.23420000.23430000	10.1462	-0.27608	0.724627	-0.380997	0.703206	0.985424
chr14.23350000.23360000.chr14.23430000.23440000	33.4836	0.22654	0.41511	0.545734	0.585249	0.985424
chr14.23350000.23360000.chr14.23440000.23450000	1.84786	0.5912	1.69242	0.349323	0.726847	0.985424
chr14.23350000.23360000.chr14.23450000.23460000	1.37009	-1.91117	1.97976	-0.965355	0.334367	0.985424
chr14.23360000.23370000.chr14.23360000.23370000	8.79284	-0.410999	0.828478	-0.496089	0.619831	0.985424
chr14.23360000.23370000.chr14.23370000.23380000	9.532	-0.559071	0.856267	-0.652916	0.51381	0.985424
chr14.23360000.23370000.chr14.23380000.23390000	24.171	0.00321575	0.46837	0.00686583	0.994522	0.996986
chr14.23360000.23370000.chr14.23390000.23400000	114.281	-0.276467	0.223378	-1.23766	0.215842	0.985424
chr14.23360000.23370000.chr14.23400000.23410000	84.4255	-0.0988426	0.268792	-0.367729	0.713075	0.985424
chr14.23360000.23370000.chr14.23410000.23420000	2.04732	-0.190821	1.6779	-0.113726	0.909455	0.995559
chr14.23360000.23370000.chr14.23420000.23430000	13.6886	-1.00634	0.610803	-1.64757	0.0994402	0.985424
chr14.23360000.23370000.chr14.23430000.23440000	33.2653	-0.552379	0.421138	-1.31164	0.189643	0.985424
chr14.23360000.23370000.chr14.23440000.23450000	3.92277	0.19618	1.1526	0.170206	0.864848	0.995559
chr14.23360000.23370000.chr14.23450000.23460000	3.70382	1.56611	1.33833	1.1702	0.241922	0.985424
chr14.23370000.23380000.chr14.23370000.23380000	18.2838	0.638194	0.573916	1.112	0.266139	0.985424
chr14.23370000.23380000.chr14.23380000.23390000	49.007	0.129972	0.341489	0.380603	0.703498	0.985424
chr14.23370000.23380000.chr14.23390000.23400000	213.344	-0.0437265	0.192964	-0.226604	0.820731	0.995559
chr14.23370000.23380000.chr14.23400000.23410000	161.153	-0.241831	0.220737	-1.09556	0.27327	0.985424
chr14.23370000.23380000.chr14.23410000.23420000	4.14764	-0.610043	1.10504	-0.552053	0.580912	0.985424
chr14.23370000.23380000.chr14.23420000.23430000	17.0828	-0.310744	0.579197	-0.536508	0.591608	0.985424
chr14.23370000.23380000.chr14.23430000.23440000	39.2859	0.295627	0.401348	0.736584	0.461375	0.985424
chr14.23370000.23380000.chr14.23440000.23450000	7.82211	-0.340729	0.835254	-0.407935	0.683322	0.985424
chr14.23370000.23380000.chr14.23450000.23460000	4.69952	-0.0748987	1.09588	-0.0683457	0.94551	0.996986
chr14.23380000.23390000.chr14.23380000.23390000	374.268	0.347766	0.162187	2.14423	0.0320146	0.955692
chr14.23380000.23390000.chr14.23390000.23400000	743.51	0.0460835	0.123756	0.372374	0.709614	0.985424
chr14.23380000.23390000.chr14.23400000.23410000	302.915	-0.118311	0.157273	-0.752266	0.451891	0.985424
chr14.23380000.23390000.chr14.23410000.23420000	25.6569	-0.0143501	0.472408	-0.0303766	0.975767	0.996986
chr14.23380000.23390000.chr14.23420000.23430000	25.5515	-0.330917	0.454248	-0.728494	0.466311	0.985424
chr14.23380000.23390000.chr14.23430000.23440000	76.9079	0.0565314	0.270344	0.209109	0.834363	0.995559
chr14.23380000.23390000.chr14.23440000.23450000	44.9512	0.329168	0.352235	0.934512	0.35004	0.985424
chr14.23380000.23390000.chr14.23450000.23460000	40.1065	-0.406974	0.377636	-1.07769	0.281172	0.985424
chr14.23390000.23400000.chr14.23390000.23400000	1680.08	0.332922	0.0969191	3.43504	0.000592457	0.0799817
chr14.23390000.23400000.chr14.23400000.23410000	1258.25	0.151732	0.114732	1.32249	0.186006	0.985424
chr14.23390000.23400000.chr14.23410000.23420000	143.997	-0.0831403	0.240005	-0.346411	0.729034	0.985424
chr14.23390000.23400000.chr14.23420000.23430000	153.8	-0.0596999	0.230441	-0.259068	0.795583	0.994478
chr14.23390000.23400000.chr14.23430000.23440000	277.736	-0.0453091	0.162965	-0.27803	0.780989	0.994478
chr14.23390000.23400000.chr14.23440000.23450000	386.161	-0.116706	0.138282	-0.843966	0.398688	0.985424
chr14.23390000.23400000.chr14.23450000.23460000	294.234	0.213411	0.163386	1.30618	0.191491	0.985424
chr14.23400000.23410000.chr14.23400000.23410000	1675.79	0.132398	0.101644	1.30257	0.192723	0.985424
chr14.23400000.23410000.chr14.23410000.23420000	393.277	0.0515921	0.151317	0.340954	0.733138	0.985424
chr14.23400000.23410000.chr14.23420000.23430000	313.52	-0.0734846	0.151055	-0.486476	0.62663	0.985424
chr14.23400000.23410000.chr14.23430000.23440000	401.796	0.0620732	0.147528	0.420755	0.673934	0.985424
chr14.23400000.23410000.chr14.23440000.23450000	814.596	0.124193	0.126483	0.981894	0.326152	0.985424
chr14.23400000.23410000.chr14.23450000.23460000	698.445	0.213144	0.126138	1.68976	0.0910733	0.985424
chr14.23410000.23420000.chr14.23410000.23420000	101.784	-0.397015	0.242171	-1.6394	0.101131	0.985424
chr14.23410000.23420000.chr14.23420000.23430000	120.679	-0.189333	0.219635	-0.862034	0.388669	0.985424
chr14.23410000.23420000.chr14.23430000.23440000	128.577	0.137383	0.213563	0.643288	0.520037	0.985424
chr14.23410000.23420000.chr14.23440000.23450000	19.2721	-0.561396	0.530734	-1.05777	0.290159	0.985424
chr14.23410000.23420000.chr14.23450000.23460000	14.7089	0.00230983	0.61144	0.00377769	0.996986	0.996986
chr14.23420000.23430000.chr14.23420000.23430000	252.979	0.0330837	0.184821	0.179004	0.857934	0.995559
chr14.23420000.23430000.chr14.23430000.23440000	338.191	-0.0165667	0.168791	-0.0981491	0.921814	0.995559
chr14.23420000.23430000.chr14.23440000.23450000	80.1841	0.114012	0.263975	0.431906	0.66581	0.985424
chr14.23420000.23430000.chr14.23450000.23460000	54.4191	0.681403	0.346107	1.96877	0.04898	0.955692
chr14.23430000.23440000.chr14.23430000.23440000	884.219	0.243126	0.123804	1.96379	0.0495544	0.955692
chr14.23430000.23440000.chr14.23440000.23450000	388.155	0.462808	0.143202	3.23186	0.00122987	0.0830159
chr14.23430000.23440000.chr14.23450000.23460000	245.85	0.433176	0.175925	2.46228	0.0138056	0.621253
chr14.23440000.23450000.chr14.23440000.23450000	75.1834	0.393508	0.329968	1.19257	0.233039	0.985424
chr14.23440000.23450000.chr14.23450000.23460000	29.4909	0.56394	0.454539	1.24068	0.214722	0.985424
chr14.23450000.23460000.chr14.23450000.23460000	24.5615	0.847417	0.496554	1.7066	0.0878972	0.985424

## Sheet: TA448_vs_NT_stim_contact
	TA448_1	TA448_2	TA448_3	NT_1	NT_3
chr14.23300000.23310000.chr14.23300000.23310000	35	47	28	40	43
chr14.23300000.23310000.chr14.23310000.23320000	120	76	46	127	135
chr14.23300000.23310000.chr14.23320000.23330000	666	372	280	747	921
chr14.23300000.23310000.chr14.23330000.23340000	5	2	3	3	2
chr14.23300000.23310000.chr14.23340000.23350000	7	2	1	9	5
chr14.23300000.23310000.chr14.23350000.23360000	5	4	1	5	7
chr14.23300000.23310000.chr14.23360000.23370000	2	0	3	3	5
chr14.23300000.23310000.chr14.23370000.23380000	1	0	0	5	1
chr14.23300000.23310000.chr14.23380000.23390000	11	11	4	29	19
chr14.23300000.23310000.chr14.23390000.23400000	73	44	31	109	112
chr14.23300000.23310000.chr14.23400000.23410000	90	57	60	100	109
chr14.23300000.23310000.chr14.23410000.23420000	3	1	2	4	11
chr14.23300000.23310000.chr14.23420000.23430000	8	6	8	17	19
chr14.23300000.23310000.chr14.23430000.23440000	29	27	16	35	47
chr14.23300000.23310000.chr14.23440000.23450000	1	0	2	4	7
chr14.23300000.23310000.chr14.23450000.23460000	3	1	6	4	5
chr14.23310000.23320000.chr14.23310000.23320000	256	157	138	235	250
chr14.23310000.23320000.chr14.23320000.23330000	1580	929	730	1631	1803
chr14.23310000.23320000.chr14.23330000.23340000	22	8	8	19	25
chr14.23310000.23320000.chr14.23340000.23350000	16	14	1	18	20
chr14.23310000.23320000.chr14.23350000.23360000	21	10	9	24	21
chr14.23310000.23320000.chr14.23360000.23370000	16	16	3	24	35
chr14.23310000.23320000.chr14.23370000.23380000	5	4	8	13	23
chr14.23310000.23320000.chr14.23380000.23390000	13	8	9	24	30
chr14.23310000.23320000.chr14.23390000.23400000	62	46	34	123	93
chr14.23310000.23320000.chr14.23400000.23410000	79	69	50	145	132
chr14.23310000.23320000.chr14.23410000.23420000	7	4	2	11	10
chr14.23310000.23320000.chr14.23420000.23430000	10	7	1	22	18
chr14.23310000.23320000.chr14.23430000.23440000	34	50	25	62	56
chr14.23310000.23320000.chr14.23440000.23450000	25	21	10	16	20
chr14.23310000.23320000.chr14.23450000.23460000	11	11	8	11	10
chr14.23320000.23330000.chr14.23320000.23330000	3187	1943	1483	3409	3564
chr14.23320000.23330000.chr14.23330000.23340000	670	360	292	705	779
chr14.23320000.23330000.chr14.23340000.23350000	345	216	125	471	478
chr14.23320000.23330000.chr14.23350000.23360000	272	163	147	330	360
chr14.23320000.23330000.chr14.23360000.23370000	290	168	100	337	403
chr14.23320000.23330000.chr14.23370000.23380000	214	125	102	280	286
chr14.23320000.23330000.chr14.23380000.23390000	169	113	77	256	263
chr14.23320000.23330000.chr14.23390000.23400000	219	202	128	357	375
chr14.23320000.23330000.chr14.23400000.23410000	270	176	140	379	397
chr14.23320000.23330000.chr14.23410000.23420000	55	34	26	96	84
chr14.23320000.23330000.chr14.23420000.23430000	99	57	28	83	100
chr14.23320000.23330000.chr14.23430000.23440000	211	85	92	241	220
chr14.23320000.23330000.chr14.23440000.23450000	217	163	129	299	343
chr14.23320000.23330000.chr14.23450000.23460000	266	135	134	356	389
chr14.23330000.23340000.chr14.23330000.23340000	18	13	6	20	24
chr14.23330000.23340000.chr14.23340000.23350000	11	16	6	14	25
chr14.23330000.23340000.chr14.23350000.23360000	3	4	4	8	4
chr14.23330000.23340000.chr14.23360000.23370000	2	3	1	6	5
chr14.23330000.23340000.chr14.23370000.23380000	7	3	2	5	5
chr14.23330000.23340000.chr14.23380000.23390000	31	14	9	29	34
chr14.23330000.23340000.chr14.23390000.23400000	160	95	90	232	231
chr14.23330000.23340000.chr14.23400000.23410000	213	128	111	315	316
chr14.23330000.23340000.chr14.23410000.23420000	2	1	1	15	9
chr14.23330000.23340000.chr14.23420000.23430000	6	13	8	29	28
chr14.23330000.23340000.chr14.23430000.23440000	73	38	38	86	112
chr14.23330000.23340000.chr14.23440000.23450000	2	4	4	6	8
chr14.23330000.23340000.chr14.23450000.23460000	6	0	5	5	2
chr14.23340000.23350000.chr14.23340000.23350000	25	16	11	10	21
chr14.23340000.23350000.chr14.23350000.23360000	4	3	3	12	1
chr14.23340000.23350000.chr14.23360000.23370000	4	3	6	7	4
chr14.23340000.23350000.chr14.23370000.23380000	3	3	2	1	5
chr14.23340000.23350000.chr14.23380000.23390000	21	21	13	32	25
chr14.23340000.23350000.chr14.23390000.23400000	158	89	51	198	188
chr14.23340000.23350000.chr14.23400000.23410000	159	96	88	201	227
chr14.23340000.23350000.chr14.23410000.23420000	5	5	1	4	5
chr14.23340000.23350000.chr14.23420000.23430000	18	17	4	32	24
chr14.23340000.23350000.chr14.23430000.23440000	59	48	25	93	101
chr14.23340000.23350000.chr14.23440000.23450000	5	1	4	8	1
chr14.23340000.23350000.chr14.23450000.23460000	2	3	1	1	1
chr14.23350000.23360000.chr14.23350000.23360000	11	16	7	14	14
chr14.23350000.23360000.chr14.23360000.23370000	4	12	1	11	12
chr14.23350000.23360000.chr14.23370000.23380000	4	5	4	9	5
chr14.23350000.23360000.chr14.23380000.23390000	20	11	8	32	31
chr14.23350000.23360000.chr14.23390000.23400000	139	101	68	182	202
chr14.23350000.23360000.chr14.23400000.23410000	121	101	48	207	196
chr14.23350000.23360000.chr14.23410000.23420000	3	3	1	6	7
chr14.23350000.23360000.chr14.23420000.23430000	19	12	8	23	31
chr14.23350000.23360000.chr14.23430000.23440000	48	32	21	68	73
chr14.23350000.23360000.chr14.23440000.23450000	3	3	1	3	5
chr14.23350000.23360000.chr14.23450000.23460000	1	4	2	7	5
chr14.23360000.23370000.chr14.23360000.23370000	11	5	7	9	10
chr14.23360000.23370000.chr14.23370000.23380000	9	8	4	13	14
chr14.23360000.23370000.chr14.23380000.23390000	30	15	7	47	26
chr14.23360000.23370000.chr14.23390000.23400000	212	97	72	254	311
chr14.23360000.23370000.chr14.23400000.23410000	148	82	76	218	228
chr14.23360000.23370000.chr14.23410000.23420000	4	8	1	10	3
chr14.23360000.23370000.chr14.23420000.23430000	17	6	10	35	19
chr14.23360000.23370000.chr14.23430000.23440000	49	22	25	64	65
chr14.23360000.23370000.chr14.23440000.23450000	1	3	2	7	6
chr14.23360000.23370000.chr14.23450000.23460000	6	2	3	4	10
chr14.23370000.23380000.chr14.23370000.23380000	24	18	13	13	15
chr14.23370000.23380000.chr14.23380000.23390000	78	52	39	103	73
chr14.23370000.23380000.chr14.23390000.23400000	346	181	166	445	413
chr14.23370000.23380000.chr14.23400000.23410000	218	168	117	296	340
chr14.23370000.23380000.chr14.23410000.23420000	4	8	3	5	6
chr14.23370000.23380000.chr14.23420000.23430000	20	21	8	36	40
chr14.23370000.23380000.chr14.23430000.23440000	53	35	38	69	66
chr14.23370000.23380000.chr14.23440000.23450000	2	5	1	7	6
chr14.23370000.23380000.chr14.23450000.23460000	1	0	1	2	7
chr14.23380000.23390000.chr14.23380000.23390000	449	363	199	479	428
chr14.23380000.23390000.chr14.23390000.23400000	1103	591	475	1275	1323
chr14.23380000.23390000.chr14.23400000.23410000	431	259	170	611	578
chr14.23380000.23390000.chr14.23410000.23420000	28	16	16	43	47
chr14.23380000.23390000.chr14.23420000.23430000	37	39	10	73	55
chr14.23380000.23390000.chr14.23430000.23440000	82	69	62	121	161
chr14.23380000.23390000.chr14.23440000.23450000	48	32	27	79	89
chr14.23380000.23390000.chr14.23450000.23460000	42	35	14	67	55
chr14.23390000.23400000.chr14.23390000.23400000	2055	1474	1055	2423	2426
chr14.23390000.23400000.chr14.23400000.23410000	1629	985	778	2036	1952
chr14.23390000.23400000.chr14.23410000.23420000	208	110	70	355	354
chr14.23390000.23400000.chr14.23420000.23430000	214	133	82	320	289
chr14.23390000.23400000.chr14.23430000.23440000	419	212	152	495	585
chr14.23390000.23400000.chr14.23440000.23450000	435	268	210	571	487
chr14.23390000.23400000.chr14.23450000.23460000	373	224	165	444	471
chr14.23400000.23410000.chr14.23400000.23410000	1993	1393	1008	2096	2152
chr14.23400000.23410000.chr14.23410000.23420000	525	314	229	664	695
chr14.23400000.23410000.chr14.23420000.23430000	393	264	188	514	510
chr14.23400000.23410000.chr14.23430000.23440000	434	315	235	574	630
chr14.23400000.23410000.chr14.23440000.23450000	756	492	406	862	815
chr14.23400000.23410000.chr14.23450000.23460000	699	438	415	932	887
chr14.23410000.23420000.chr14.23410000.23420000	82	61	42	123	150
chr14.23410000.23420000.chr14.23420000.23430000	131	83	66	183	170
chr14.23410000.23420000.chr14.23430000.23440000	134	70	60	177	162
chr14.23410000.23420000.chr14.23440000.23450000	20	13	10	24	21
chr14.23410000.23420000.chr14.23450000.23460000	17	6	7	26	18
chr14.23420000.23430000.chr14.23420000.23430000	346	233	138	404	437
chr14.23420000.23430000.chr14.23430000.23440000	396	222	199	473	489
chr14.23420000.23430000.chr14.23440000.23450000	85	43	61	117	110
chr14.23420000.23430000.chr14.23450000.23460000	71	65	36	84	89
chr14.23430000.23440000.chr14.23430000.23440000	1131	774	664	1172	1244
chr14.23430000.23440000.chr14.23440000.23450000	539	315	288	590	569
chr14.23430000.23440000.chr14.23450000.23460000	345	242	199	372	403
chr14.23440000.23450000.chr14.23440000.23450000	47	55	58	73	86
chr14.23440000.23450000.chr14.23450000.23460000	30	22	24	39	41
chr14.23450000.23460000.chr14.23450000.23460000	22	22	13	11	30

[truncated: 7 more sheets: TA448_vs_NT_stim_deseq2, HL1_R3_vs_NT_contact, HL1_R3_vs_NT_deseq2, hg38_probe_targets, hg38_bases_covered, mm39_probe_targets, mm39_bases_covered]
