# Supplementary material for: A gene regulatory element modulates myosin expression and controls cardiomyocyte response to stress
Source: HighWire-hosted journal article supplement (doi:10.1101/gr.280825.125), 2025-10-22
Supplement: Supplemental_Table_S6.xlsx [file Supplemental_Table_S6.xlsx]

## Sheet: Summary
Tab	Summary of contents
gRNA	gRNA sequences with overhangs to allow for cloning into vectors containing an Esp3I site
gRNA off target analysis	Results for gRNA off target analysis from Cas-OFFinder
Next gene sequencing primers	Primers use for generation of ATAC-seq and HiCAR libraries
Antibodies	Primary and secondary antibodies used in the creation of Figure 1
Accession numbers	Information about data use in visualization of browser tracks
qPCR primers	Primer sequences used for the analysis of gene expression shown in Figure 4

## Sheet: gRNA
gRNA target	T4 cloning sequence
Human Control NT Sense	CACCGGTATCGGCAACATACTGCGT
Human Control NT Antisense	AAACACGCAGTATGTTGCCGATACC
Human Region 1a CRISPRi Sense	CACCGTTCTTGGACGTGCTGAGAAG
Human Region 1a CRISPRi Antisense	AAACCTTCTCAGCACGTCCAAGAAC
Human Region 1b CRISPRi Sense	CACCGTGCCGGTCAAGGGCAGTCTC
Human Region 1b CRISPRi Antisense	AAACGAGACTGCCCTTGACCGGCAC
Human Region 2 CRISPRi Sense	CACCGTCCTGTTAACCCTGCACCCC
Human Region 2 CRISPRi Antisense	AAACGGGGTGCAGGGTTAACAGGAC
Human Region 3 CRISPRi Sense	CACCGGAGAGCCGTTGATTATCAGC
Human Region 3 CRISPRi Antisense	AAACGCTGATAATCAACGGCTCTCC
Human Region 3 CRISPRa Sense gRNA-1	CACCGACACGCCCCAGGCGAGCGCC
Human Region 3 CRISPRa Antisense gRNA-1	AAACGGCGCTCGCCTGGGGCGTGTC
Human Region 3 CRISPRa Sense gRNA-2	CACCGAGAGCTCCCCCTTGTGGTGT
Human Region 3 CRISPRa Antisense gRNA-2	AAACACACCACAAGGGGGAGCTCTC
Mouse Control NT Sense	CACCGGCACTACCAGAGCTAACTCA
Mouse Control NT Antisense	AAACTGAGTTAGCTCTGGTAGTGCC
Mouse Region 3 CRISPRa Sense gRNA-1	CACCGTTGTGTAGAGCTCCCCCTTG
Mouse Region 3 CRISPRa Antisense gRNA-1	AAACCAAGGGGGAGCTCTACACAAC
Mouse Region 3 CRISPRa Sense gRNA-2	CACCGATCAAGACAGTACTGTTCCA
Mouse Region 3 CRISPRa Antisense gRNA-2	AAACTGGAACAGTACTGTCTTGATC

## Sheet: gRNA off target analysis
CRISPR R3 gRNA-1 Human
crRNA	DNA	Chromosome	Position	Direction	Mismatches	Bulge Size	Target classification
ACACGCCCCAGGCGAGCGCCNGG	ACACGCCCCAGGCGAGCGCCTGG	chr14	23380086	-	0	0	on target
ACACGCCCCAGGCGAGCGCCNGG	cCACGCCCCAGGCGgGCtCCGGG	chr1	36323364	+	3	0
ACACGCCCCAGGCGAGCGCCNGG	ACtCGCCCCAGGCcAGtGCCAGG	chr15	27350756	-	3	0			2289223
ACACGCCCCAGGCGAGCGCCNGG	gCACGCCCaAGcCGAGCGCCTGG	chr19	5905000	+	3	0
ACACGCCCCAGGCGAGCGCCNGG	ACcCtCCCCAGGCGgGCGCCCGG	chr3	126270374	+	3	0
ACACGCCCCAGGCGAGCGCCNGG	ACACGCCCCAGGatAGaGCCAGG	chr4	5615100	+	3	0
CRISPRa R3 gRNA-2 Human
crRNA	DNA	Chromosome	Position	Direction	Mismatches	Bulge Size	Target classification
AGAGCTCCCCCTTGTGGTGTNGG	AGAGCTCCCCCTTGTGGTGTGGG	chr14	23380111	+	0	0	on target
AGAGCTCCCCCTTGTGGTGTNGG	AGAGCTCCCaCTgGTGGTGgAGG	chr13	104571822	-	3	0
AGAGCTCCCCCTTGTGGTGTNGG	AGAaCTgCCCaTTGTGGTGTTGG	chr15	25061533	+	3	0
AGAGCTCCCCCTTGTGGTGTNGG	AGAGCTCCtCCTgGTGGgGTGGG	chr17	82093066	-	3	0
AGAGCTCCCCCTTGTGGTGTNGG	AGAGCTCCCCtcTGTGGTGgAGG	chr2	30670699	-	3	0
AGAGCTCCCCCTTGTGGTGTNGG	AGAGCTCCCCCTgGcaGTGTTGG	chr3	38726779	+	3	0
AGAGCTCCCCCTTGTGGTGTNGG	AGAtCTtaCCCTTGTGGTGTAGG	chr4	65351379	+	3	0			-87543595
AGAGCTCCCCCTTGTGGTGTNGG	AGAGCTggCCCTgGTGGTGTAGG	chr6	126559033	-	3	0			59736279
AGAGCTCCCCCTTGTGGTGTNGG	AGAGCTgCCaCTTtTGGTGTTGG	chr6	134423095	+	3	0
AGAGCTCCCCCTTGTGGTGTNGG	tGAGaTCCCCCaTGTGGTGTTGG	chr6	170018414	+	3	0
AGAGCTCCCCCTTGTGGTGTNGG	AGAGCaCCCtCTTGTGGTGaAGG	chr7	73734866	+	3	0
AGAGCTCCCCCTTGTGGTGTNGG	tGAGCTCCCCCTTcTGGTGgGGG	chr8	140200335	-	3	0
AGAGCTCCCCCTTGTGGTGTNGG	AGgGCTgCCCCTTGTGGTGgGGG	chr9	127978087	-	3	0
AGAGCTCCCCCTTGTGGTGTNGG	AGAGCTCCaCCTTGTGaTcTTGG	chrX	124018230	+	3	0
CRSIPRi R1 gRNA Human
crRNA	DNA	Chromosome	Position	Direction	Mismatches	Bulge Size	Target classification
TTCTTGGACGTGCTGAGAAGNGG	TTCTTGGACGTGCTGAGAAGTGG	chr14	23377683	-	0	0	on target
TTCTTGGACGTGCTGAGAAGNGG	aTCTTGGACGTGCaGAGcAGTGG	chr10	60625221	+	3	0
TTCTTGGACGTGCTGAGAAGNGG	TTCTTtGgtGTGCTGAGAAGAGG	chr11	37823949	+	3	0
TTCTTGGACGTGCTGAGAAGNGG	TTCcTGGAgGaGCTGAGAAGAGG	chr11	46700986	+	3	0
TTCTTGGACGTGCTGAGAAGNGG	TcCTTGcAgGTGCTGAGAAGTGG	chr15	77504314	+	3	0
TTCTTGGACGTGCTGAGAAGNGG	TTCaTGGAgGTGaTGAGAAGAGG	chr16	63723870	+	3	0
TTCTTGGACGTGCTGAGAAGNGG	TcgaTGGACGTGCTGAGAAGTGG	chr2	10738919	-	3	0
TTCTTGGACGTGCTGAGAAGNGG	TTCTTGtAaGTGCTGgGAAGTGG	chr2	68458193	+	3	0
TTCTTGGACGTGCTGAGAAGNGG	TTCTTGGAaaTGCTGAGAAaTGG	chr20	25052282	-	3	0
TTCTTGGACGTGCTGAGAAGNGG	TTCaTGGcCaTGCTGAGAAGGGG	chr9	135219041	-	3	0
TTCTTGGACGTGCTGAGAAGNGG	TcCTTGGtCGgGCTGAGAAGGGG	chrX	129756472	-	3	0
CRSIPRi R2 gRNA Human
crRNA	DNA	Chromosome	Position	Direction	Mismatches	Bulge Size	Target classification
TCCTGTTAACCCTGCACCCCNGG	TCCTGTTAACCCTGCACCCCTGG	chr14	23379000	+	0	0	on target
TCCTGTTAACCCTGCACCCCNGG	TCCTGTTtcCCCTGCAtCCCTGG	chr12	105862471	-	3	0
TCCTGTTAACCCTGCACCCCNGG	TtCTGTTAAaCCTGCACCCtTGG	chr16	79228822	-	3	0
TCCTGTTAACCCTGCACCCCNGG	TCCTGTTttCCCTGCAtCCCAGG	chr20	47923217	-	3	0
TCCTGTTAACCCTGCACCCCNGG	cCCTGTTcACaCTGCACCCCTGG	chr20	61855109	-	3	0
TCCTGTTAACCCTGCACCCCNGG	cCCTGTTcACaCTGCACCCCTGG	chr20	61854512	-	3	0
TCCTGTTAACCCTGCACCCCNGG	TCCTGTTcACaCTGCAgCCCTGG	chr20	61854420	-	3	0
TCCTGTTAACCCTGCACCCCNGG	cCCTGTTcACaCTGCACCCCTGG	chr20	61854971	-	3	0
TCCTGTTAACCCTGCACCCCNGG	cCCTGTTcACaCTGCACCCCTGG	chr20	61854925	-	3	0
TCCTGTTAACCCTGCACCCCNGG	TCCaGgTcACCCTGCACCCCTGG	chr21	41727779	+	3	0
TCCTGTTAACCCTGCACCCCNGG	TCCTGTgAtCCCTGCACaCCTGG	chr21	41950311	+	3	0
TCCTGTTAACCCTGCACCCCNGG	TCCTGTTcACtCTGCtCCCCGGG	chr22	48353146	+	3	0
TCCTGTTAACCCTGCACCCCNGG	TCCTGTTggCCCTGCtCCCCTGG	chr6	15944038	-	3	0
TCCTGTTAACCCTGCACCCCNGG	TCCTGTTAACCCTGCcCttCTGG	chr6	128437871	-	3	0
TCCTGTTAACCCTGCACCCCNGG	TCCTGTgAACCCTGCAtaCCAGG	chr7	2442852	+	3	0
TCCTGTTAACCCTGCACCCCNGG	TCCTtTTAACCaTGgACCCCAGG	chr7	28677586	-	3	0
TCCTGTTAACCCTGCACCCCNGG	TCCTGTcAgCCCTGCAaCCCTGG	chr9	93028770	-	3	0
CRSIPRi R3 gRNA Human
crRNA	DNA	Chromosome	Position	Direction	Mismatches	Bulge Size	Target classification
GAGAGCCGTTGATTATCAGCNGG	GAGAGCCGTTGATTATCAGCTGG	chr14	23380216	+	0	0	on target
GAGAGCCGTTGATTATCAGCNGG	GAGAGCCaTTGATTtTCAGCAGG	chr6	167697661	+	2	0	noncoding / no expressed gene within 100kb			chr6	167697661	167597661	167797661
GAGAGCCGTTGATTATCAGCNGG	GAGAGaCGTTcATTcTCAGCCGG	chr16	63082482	+	3	0					chr6	167597661	167797661
GAGAGCCGTTGATTATCAGCNGG	GAGAGaCGTgGATTcTCAGCTGG	chr3	46460263	-	3	0
CRISPRa R3 gRNA-1 Mouse
crRNA	DNA	Chromosome	Position	Direction	Mismatches	Bulge Size	Target classification
TTGTGTAGAGCTCCCCCTTGNGG	TTGTGTAGAGCTCCCCCTTGTGG	chr14	54939555	+	0	0	on target
TTGTGTAGAGCTCCCCCTTGNGG	TTGTGTAGAGCcCCgCCaTGTGG	chr1	152982438	+	3	0
TTGTGTAGAGCTCCCCCTTGNGG	TTGTGcAGAGCTCtCCtTTGTGG	chr10	70925902	-	3	0
TTGTGTAGAGCTCCCCCTTGNGG	TgcTGgAGAGCTCCCCCTTGTGG	chr15	29234813	-	3	0
TTGTGTAGAGCTCCCCCTTGNGG	TTGTGTAGAttTtCCCCTTGGGG	chr15	68620876	-	3	0
TTGTGTAGAGCTCCCCCTTGNGG	TTGTGTgGAGtTCCCCCgTGCGG	chr15	76522731	+	3	0
TTGTGTAGAGCTCCCCCTTGNGG	TTGTGTAGAtgTCCCaCTTGAGG	chr3	111992543	+	3	0		-8420357
TTGTGTAGAGCTCCCCCTTGNGG	TgcTGTAGAGCTCCCCCTgGTGG	chr6	146430144	+	3	0
TTGTGTAGAGCTCCCCCTTGNGG	TTGgGcAGAGCaCCCCCTTGGGG	chr7	95722166	-	3	0
CRISPRa R3 gRNA-2 Mouse
crRNA	DNA	Chromosome	Position	Direction	Mismatches	Bulge Size	Target classification
ATCAAGACAGTACTGTTCCANGG	ATCAAGACAGTACTGTTCCAAGG	chr14	54939778	-	0	0	on target
ATCAAGACAGTACTGTTCCANGG	ATCAAGAaAaTACTGTTCCACGG	chr12	63879114	+	2	0	noncoding / no gene within 250kb of the target			chr12	63879114	63629114	64129114
ATCAAGACAGTACTGTTCCANGG	ATCAAGACAGTACTGTgCCtCGG	chr5	69784963	-	2	0	noncoding / no gene within 100kb of the target				chr12	63629114	64129114
ATCAAGACAGTACTGTTCCANGG	gTCAAGACAGTACaGcTCCAGGG	chr1	181427813	+	3	0				chr5	69784963	69684963	69884963
ATCAAGACAGTACTGTTCCANGG	ATCAAGtCAGTACaGTTgCAAGG	chr17	76628809	+	3	0					chr5	69684963	69884963
ATCAAGACAGTACTGTTCCANGG	ATCAtGACAGTgCTcTTCCATGG	chr17	89098958	-	3	0
ATCAAGACAGTACTGTTCCANGG	ATCAAGACtGaACTaTTCCAGGG	chr2	169966733	-	3	0
ATCAAGACAGTACTGTTCCANGG	AcCcAGcCAGTACTGTTCCAGGG	chr3	65164419	-	3	0
ATCAAGACAGTACTGTTCCANGG	AaCAAGcCAGTACTcTTCCATGG	chr3	120412900	+	3	0
ATCAAGACAGTACTGTTCCANGG	ATCcAGAaAGTACTGTTtCAGGG	chr3	137061934	-	3	0
ATCAAGACAGTACTGTTCCANGG	ATCAAGtCAGcACTcTTCCAGGG	chr9	49905951	-	3	0
ATCAAGACAGTACTGTTCCANGG	ATCAAacCAGTgCTGTTCCACGG	chr9	96504334	-	3	0
ATCAAGACAGTACTGTTCCANGG	ATCAAGAaAaTACTGgTCCATGG	chrX	6315201	-	3	0
ATCAAGACAGTACTGTTCCANGG	ATCtAGACAGTtCTtTTCCAAGG	chrX	154329716	+	3	0

## Sheet: Next gene sequencing primers
ATAC-seq Primers
TA01-N701-ATACseq	CAAGCAGAAGACGGCATACGAGATTCGCCTTAGTCTCGTGGGCTCGG
TA02-N702-ATACseq	CAAGCAGAAGACGGCATACGAGATCTAGTACGGTCTCGTGGGCTCGG
TA03-N703-ATACseq	CAAGCAGAAGACGGCATACGAGATTTCTGCCTGTCTCGTGGGCTCGG
TA04-N704-ATACseq	CAAGCAGAAGACGGCATACGAGATGCTCAGGAGTCTCGTGGGCTCGG
TA05-N705-ATACseq	CAAGCAGAAGACGGCATACGAGATAGGAGTCCGTCTCGTGGGCTCGG
TA06-N706-ATACseq	CAAGCAGAAGACGGCATACGAGATCATGCCTAGTCTCGTGGGCTCGG
TA07-N707-ATACseq	CAAGCAGAAGACGGCATACGAGATGTAGAGAGGTCTCGTGGGCTCGG
TA08-N708-ATACseq	CAAGCAGAAGACGGCATACGAGATCCTCTCTGGTCTCGTGGGCTCGG
TA09-N709-ATACseq	CAAGCAGAAGACGGCATACGAGATAGCGTAGCGTCTCGTGGGCTCGG
TA10-N710-ATACseq	CAAGCAGAAGACGGCATACGAGATCAGCCTCGGTCTCGTGGGCTCGG
TA11-Nxt_i5_N501-ATACseq	AATGATACGGCGACCACCGAGATCTACACTAGATCGCTCGTCGGCAGCGT*C
TA12-Nxt_i5_S502-ATACseq	AATGATACGGCGACCACCGAGATCTACACCTCTCTATTCGTCGGCAGCGT*C
HiCAR Primers
i5-primer	i5 seq.
NEB i501	AATGATACGGCGACCACCGAGATCTACACTATAGCCTACACTCTTTCCCTACACGACGCTCTTCCGATCT
NEB i502	AATGATACGGCGACCACCGAGATCTACACATAGAGGCACACTCTTTCCCTACACGACGCTCTTCCGATCT
NEB i503	AATGATACGGCGACCACCGAGATCTACACCCTATCCTACACTCTTTCCCTACACGACGCTCTTCCGATCT
NEB i504	AATGATACGGCGACCACCGAGATCTACACCCTATCCTACACTCTTTCCCTACACGACGCTCTTCCGATCT
NEB i505	AATGATACGGCGACCACCGAGATCTACACCCTATCCTACACTCTTTCCCTACACGACGCTCTTCCGATCT
NEB i506	AATGATACGGCGACCACCGAGATCTACACCCTATCCTACACTCTTTCCCTACACGACGCTCTTCCGATCT
NEB i507	AATGATACGGCGACCACCGAGATCTACACCCTATCCTACACTCTTTCCCTACACGACGCTCTTCCGATCT
NEB i508	AATGATACGGCGACCACCGAGATCTACACCCTATCCTACACTCTTTCCCTACACGACGCTCTTCCGATCT
NEB i509	AATGATACGGCGACCACCGAGATCTACACCCTATCCTACACTCTTTCCCTACACGACGCTCTTCCGATCT
NEB i510	AATGATACGGCGACCACCGAGATCTACACCCTATCCTACACTCTTTCCCTACACGACGCTCTTCCGATCT
NEB i511	AATGATACGGCGACCACCGAGATCTACACCCTATCCTACACTCTTTCCCTACACGACGCTCTTCCGATCT
NEB i512	AATGATACGGCGACCACCGAGATCTACACCCTATCCTACACTCTTTCCCTACACGACGCTCTTCCGATCT
NEB i513	AATGATACGGCGACCACCGAGATCTACACCCTATCCTACACTCTTTCCCTACACGACGCTCTTCCGATCT
NEB i514	AATGATACGGCGACCACCGAGATCTACACCCTATCCTACACTCTTTCCCTACACGACGCTCTTCCGATCT
i7 primer	i7 seq
Nextera-pcr-i7-2-L	CAAGCAGAAGACGGCATACGAGATCTAGTACGGTCTCGTGGGCTCGGAGATGTGTATAAGAGACAG
Nextera-pcr-i7-3-L	CAAGCAGAAGACGGCATACGAGATTTCTGCCTGTCTCGTGGGCTCGGAGATGTGTATAAGAGACAG
Nextera-pcr-i7-4-L	CAAGCAGAAGACGGCATACGAGATGCTCAGGAGTCTCGTGGGCTCGGAGATGTGTATAAGAGACAG
Nextera-pcr-i7-5-L	CAAGCAGAAGACGGCATACGAGATAGGAGTCCGTCTCGTGGGCTCGGAGATGTGTATAAGAGACAG
Nextera-pcr-i7-6-L	CAAGCAGAAGACGGCATACGAGATCATGCCTAGTCTCGTGGGCTCGGAGATGTGTATAAGAGACAG
Nextera-pcr-i7-7-L	CAAGCAGAAGACGGCATACGAGATGTAGAGAGGTCTCGTGGGCTCGGAGATGTGTATAAGAGACAG
Nextera-pcr-i7-10-L	CAAGCAGAAGACGGCATACGAGATCAGCCTCGGTCTCGTGGGCTCGGAGATGTGTATAAGAGACAG
Nextera-pcr-i7-11-L	CAAGCAGAAGACGGCATACGAGATTGCCTCTTGTCTCGTGGGCTCGGAGATGTGTATAAGAGACAG
Nextera-pcr-i7-12-L	CAAGCAGAAGACGGCATACGAGATTCCTCTACGTCTCGTGGGCTCGGAGATGTGTATAAGAGACAG
Nextera-pcr-i7-14-L	CAAGCAGAAGACGGCATACGAGATTCATGAGCGTCTCGTGGGCTCGGAGATGTGTATAAGAGACAG
Nextera-pcr-i7-15-L	CAAGCAGAAGACGGCATACGAGATCCTGAGATGTCTCGTGGGCTCGGAGATGTGTATAAGAGACAG
Nextera-pcr-i7-16-L	CAAGCAGAAGACGGCATACGAGATTAGCGAGTGTCTCGTGGGCTCGGAGATGTGTATAAGAGACAG

## Sheet: Antibodies
Company	Target	catalog #	Dilution
Sigma	anti-alpha-Actinin	A7811-100UL	1:500
Cell Signaling	Phospho-Histone H3 (Ser10) Antibody	9701S	1:800
ThermoFisher	Donkey anti-Mouse IgG (H+L) Highly Cross-Adsorbed Secondary Antibody, Alexa Fluor 647	A-31571	1:1000
ThermoFisher	Goat anti-Rabbit IgG (H+L) Highly Cross-Adsorbed Secondary Antibody, Alexa Fluor 488	A-11034	1:1000
ThermoFisher	DAPI Solution	62248	1:1000
abcam	TNNT2	ab45932	1:500
ThermoFisher	F-actin	A22287	1:400

## Sheet: Accession numbers
Sample	Accession#	Publication
HumanMaleheartRVCTCFChIP-seq	ENCFF505OIJ	PMID:22955616
HumanMaleheartLVCTCFChIP-seq	ENCFF915AST	PMID:22955616
HumanMaleheartRVH3K27me3ChIP-seq	ENCFF703WUP	PMID:22955616
MousefemaleheartCTCFChIP-seq	ENCFF155GHM	PMID:22955616
MousepostnatalheartCTCFChIP-seq	ENCFF055IZM	PMID:22955616
HumanmaleheartRAH3K27me3ChIP-seq	ENCFF980FUE	PMID:32728046
HumanmaleheartRVH3K27acChIP-seq	ENCFF012XMZ	PMID: 22955616
HumanmaleheartLVH3K27me3ChIP-seq	ENCFF718XVH	PMID: 22955616
HumanfemaleheartRACTCFChIP-seq	ENCFF259AZZ	PMID: 22955616
HumanfemaleRVCTCFChIP-seq	ENCFF257ODJ	PMID: 22955616
MouseheartTEAD1andNKX25TFChIP-seq	GSE124008	PMID:31659164
Mousejeartp300ChIP-seq	GSE195905	PMID:37071996
HL-1celltranscriptionfactorChIP-seq	GSE21529	PMID:21415370
HumanchamberspecificsinglenucleiATAC-seq	GSE165839	PMID: 33990324
Supplementary Figure S2a	ENCFF495UDL, ENCFF763TYO, ENCFF058GEM, ENCFF476MBG, ENCFF984DOS, ENCFF969BAO, ENCFF318ILJ, ENCFF499ZEJ, ENCFF955MQX, ENCFF275OLK, ENCFF375UAV, ENCFF980FUE, ENCFF983HIO, ENCFF007ZXP, ENCFF310VRG, ENCFF116TJK, ENCFF066DSD, ENCFF066DSD, ENCFF573DJV, and ENCFF054VRQ	PMID: 32728046, PMID: 32728249, PMID: 22955616
Supplementary Figure S2b	ENCSR899NLW, ENCSR239GFM, ENCSR714QAF, ENCSR265NZF, ENCSR549DVY, ENCSR859KGW, ENCSR675YAS, ENCSR969JYY, ENCSR634LOX, ENCSR357XTU, ENCSR561WEX, ENCSR176WMG, ENCSR160UAZ, ENCSR531RKI, ENCSR688YOZ, ENCSR448DCX, ENCSR755LFM, ENCSR175CNQ, ENCSR999CPT, ENCSR995BHD, ENCSR022MON, ENCSR718CDN, ENCSR993QGR, ENCSR085HNI, ENCSR001UXR, ENCSR224HFZ, ENCSR000COY, ENCSR654UPQ, and ENCSR433YBD	PMID: 32728046, PMID: 32728249, PMID: 22955616
Supplementary Figure S2c	ENCFF053FMQ, ENCFF033OVU, ENCFF357DTZ, ENCFF064KBT, ENCFF069RMH, ENCFF592FPI, ENCFF069ZID, ENCFF611FWS, ENCFF072UOA, ENCFF168YVD, ENCFF185JEB, ENCFF194NPN, ENCFF209YFM, ENCFF259CAK, ENCFF630HIW, ENCFF351UQV, ENCFF402HML, ENCFF682YSX, ENCFF498ECZ, ENCFF509TTX, ENCFF604EJP, ENCFF751LRX, ENCFF797WZE, ENCFF284EJX, ENCFF851MCI, ENCFF915OOI, ENCFF920CTO, ENCFF942LPA, ENCFF958IXF, ENCFF983HIO, ENCFF966I…
Figure 3 and Supplementary Figure S3 to S4	ENCFF505OIJ, ENCFF915AST, ENCFF703WUP, ENCFF155GHM, ENCFF055IZM, ENCFF297LKI, ENCFF012XMZ, ENCFF718XVH, ENCFF259AZZ, ENCFF257ODJ, GSE124008, GSE195905, GSE21529	PMID: 32728046, PMID: 32728249, PMID: 22955616, PMID: 31659164, PMID: 37071996, PMID: 21415370
ATAC-seq on human iPSC-CMs +/- GSK3i	GSE283424
RNA-seq on human iPSC-CMs +/- GSK3i	GSE283426
Human CRISPRa HiCAR	GSE283427
Human CRISPRi HiCAR	GSE283430
Mouse CRISPRa HiCAR	GSE283432
Human Heart ATAC	ENCSR117PYB, ENCSR745CGG, ENCSR053SGP, ENCSR133CMC
Mouse organ H3K27ac P0	ENCSR094TTT, ENCSR675HDX, ENCSR642VYW, ENCSR140YPL, ENCSR616TJM, ENCSR884MYD, ENCSR346FJG
Mouse heart ChIP histone modifications P0	ENCSR675HDX, ENCSR790LOX, ENCSR235JCY, ENCSR488OCA, ENCSR373OCX, ENCSR875ZAO, ENCSR519DNE, ENCSR965JWF
Mouse organ ATAC-seq P0	ENCSR310MLB, ENCSR451NAE, ENCSR079GOY, ENCSR389CLN, ENCSR609OHJ, ENCSR102NGD, ENCSR597BGP
Mouse heart ChIP histone modifications and ATAC-seq through development	ENCSR068YGC, ENCSR371KFW, ENCSR451NAE, ENCSR552ABC, ENCSR603MWL, ENCSR652CNN, ENCSR820ACB
Mouse heart ChIP histone modifications through development	ENCSR000CDF, ENCSR123MLY, ENCSR222IHX, ENCSR360ANE, ENCSR574VME, ENCSR582SPN, ENCSR675HDX, ENCSR699XHY, ENCSR846PJO, ENCSR000CEJ, ENCSR122HLY, ENCSR266JQW, ENCSR357OED, ENCSR380BBL, ENCSR437NPG, ENCSR781ORQ, ENCSR790LOX, ENCSR963OLG

## Sheet: qPCR primers
Oligo ID	sequence
F.TBP.human	tcttggcgtgtgaagataacccaagga
R.TBP.human	ccttgcgctggaactcgtctcactattc
F.MYH6.human	cttctcctcctacgcaactgccgatac
R.MYH6.human	ccgacaccgtctggaaggatgagc
F.MYH7.human	ggaagaccagatgaatgagcaccggag
R.MYH7.human	tttgcaacttggcccgctggc
F.CMTM5.human	cctgaccctcatcatcttcatctgcttcacg
R.CMTM5.human	gcgctggtagtactgggtggcataga
F.TNNT2.human	GGCAGCGGAAGAGGATGCTGAA
R.TNNT2.human	GAGGCACCAAGTTGGGCATGAACGA
F.NPPA.human	Hs.PT.58.4259173
R.NPPA.human	Hs.PT.58.4259173
F.NPPB.human	Hs.PT.58.19450190
R.NPPB.human	Hs.PT.58.19450190
F.ATP2A2.human	CTTGCTGGAACTTGTGATTGAG
R.ATP2A2.human	ATTACAAAAGGTTCTACAAAGGCTG
F.enhancer.RNA.region1a.human	ggcaatgacagcctctaacatggcca
R.enhancer.RNA.region1a.human	ggcagcagaccacagataaagtgcagt
F.enhancer.RNA.region1b.human	gttgctgggtgagcagagtggga
R.enhancer.RNA.region1b.human	actctggcacatctccctatcccct
F.enhancer.RNA.region2.human	ctgtgtcagtgccatcatcatcttcctgg
R.enhancer.RNA.region2.human	gcagggctgaactcacaaaagcagc
F.enhancer.RNA.region3.human	ctgggagagccgttgattatcagctgg
R.enhancer.RNA.region3.human	ccctagctctgtcacaaatgagttcacctcc
F.Tbp.mouse	Mm.PT.39a.22214839
R.Tbp.mouse	Mm.PT.39a.22214839
F.Myh6.mouse	Mm.PT.58.31314128
R.Myh6.mouse	Mm.PT.58.31314128
F.Myh7.mouse	Mm.PT.58.17465550
R.Myh7.mouse	Mm.PT.58.17465550
F.Nppa.mouse	TTCCTCGTCTTGGCCTTTTG
R.Nppa.mouse	CCTCATCTTCTACCGGCATC
F.Nppb.mouse	GTCCAGCAGAGACCTCAAAA
R.Nppb.mouse	AGGCAGAGTCAGAAACTGGA
F.Atp2a2.mouse	TCGACCAGTCAATTCTTACAGG
R.Atp2a2.mouse	CAGGGACAGGGTCAGTATGC
F.Tnnt2.mouse	TACAGACTCTGATCGAGGCTCACTTC
R.Tnnt2.mouse	TCATTGCGAATACGCTGCTGCTC
